# Supplementary material for: Association Between Obesity and Incident Colorectal Cancer: An Analysis Based on Colorectal Cancer Database in the Cancer Genome Atlas
Source: Research Square preprint supplement (doi:10.21203/rs.3.rs-200275/v1), 2021-02-17
Supplement: Supplementary file 1 [file 4b253a76a92e8fa2805b09b7.xlsx]

## Sheet: obese
Tag	logFC	AveExpr	t	P.Value	adj.P.Val	B
MS4A12	-26535.5	1158.61	-43.2654	1.98482e-56	1.15888e-51	111.685
TMIGD1	-6631.17	290.5	-40.5488	2.56861e-54	7.49866e-50	107.747
CA2	-72696	4212.4	-29.41	4.53901e-44	8.83397e-40	87.4348
GBA3	-1343.28	78.7625	-28.6434	3.0174e-43	4.40442e-39	85.7322
RP1-35C21.1	-92.3247	6.1375	-28.2136	8.89012e-43	1.03813e-38	84.7569
SLC51B	-4338.56	355.8	-26.552	6.60703e-41	6.42942e-37	80.8409
PKIB	-6541.48	555.163	-25.3161	1.87799e-39	1.56643e-35	77.7699
XXyac-YM21GA2.7	-90.3636	4.025	-24.5546	1.57572e-38	1.15002e-34	75.8063
SLC51A	-7444.84	464.012	-24.4854	1.91656e-38	1.16254e-34	75.6251
CDKN2B-AS1	-2160.26	110.412	-24.472	1.9911e-38	1.16254e-34	75.5898
TEX11	-284.792	23.8875	-23.9632	8.51857e-38	4.52158e-34	74.2421
CEACAM7	-194609	12906.5	-22.9577	1.61674e-36	7.8664e-33	71.5012
UGT1A8	-962.987	65.125	-22.8857	2.00359e-36	8.99875e-33	71.3009
RP11-678G14.3	-56.1991	3.575	-22.7313	3.17845e-36	1.32557e-32	70.8695
SLC4A4	-15083.9	950.763	-20.9968	6.68806e-34	2.6033e-30	65.844
BMP3	-4326.11	241.45	-20.3591	5.17326e-33	1.88782e-29	63.91
CA4	-23904.7	1082.71	-20.168	9.63246e-33	3.3083e-29	63.3212
DUSP21	-3.25541	0.2	-19.5337	7.8057e-32	2.53195e-28	61.3352
AMPD1	-265.727	22.2375	-19.4329	1.09288e-31	3.35841e-28	61.0152
LINC00974	-73.0693	4.3375	-19.0413	4.08775e-31	1.19336e-27	59.7593
SLC26A2	-124977	9509.92	-18.9499	5.57488e-31	1.55e-27	59.4636
SULT1A2	-1095.61	94.8125	-18.4104	3.5527e-30	9.4287e-27	57.6961
USP2	-3066.5	194.162	-18.2262	6.73812e-30	1.71052e-26	57.0842
GPR119	-5.47186	0.4	-17.2213	2.38061e-28	5.79153e-25	53.6677
WSCD1	-2766.44	328.637	-17.1781	2.78318e-28	6.50006e-25	53.5176
ADH1C	-22476.2	1844.35	-17.1457	3.12905e-28	7.02675e-25	53.4051
CA7	-3566.8	175.287	-17.0765	4.02086e-28	8.53301e-25	53.1641
BEST4	-3946.97	189.713	-17.0716	4.09208e-28	8.53301e-25	53.1473
SLC17A8	-125.749	6.3	-17.042	4.55655e-28	9.17391e-25	53.0439
RP11-807H22.5	-44.7706	2.575	-16.8827	8.13888e-28	1.58402e-24	52.4862
GUCA2A	-22947.4	1240.16	-16.7513	1.31621e-27	2.47902e-24	52.0238
UGT1A10	-2974.65	293.9	-16.6591	1.84653e-27	3.36916e-24	51.698
FAM135B	-111.788	8.7375	-16.5621	2.64007e-27	4.67109e-24	51.3538
SLC17A4	-3373.61	341.9	-16.3432	5.93923e-27	1.01992e-23	50.5727
SPIB	-2401.63	175.762	-16.2667	7.89716e-27	1.3174e-23	50.2981
SGK1	-30649.7	2992	-16.2517	8.35046e-27	1.35433e-23	50.2443
RP11-396O20.1	-22.4286	1.4125	-16.0967	1.49122e-26	2.35319e-23	49.6851
VSTM2A	-199.688	12.8	-16.0039	2.11276e-26	3.24626e-23	49.3489
RP11-169K16.6	-164.247	22.9125	-15.9247	2.84689e-26	4.26209e-23	49.0611
SLC25A34	-931.216	78.0375	-15.8435	3.86825e-26	5.64639e-23	48.7651
RP4-659I19.1	-17.1602	1.15	-15.5313	1.26753e-25	1.80505e-22	47.6185
MT1F	-3623.04	407.825	-15.4076	2.03542e-25	2.82958e-22	47.1606
CD177	-37287.3	1572.26	-15.3967	2.12216e-25	2.88155e-22	47.1202
OTOP2	-5595.19	219.3	-15.3823	2.24291e-25	2.97629e-22	47.0667
CDKN2B-AS	-18.5195	1.175	-15.0289	8.78423e-25	1.13974e-21	45.7456
RP11-396O20.2	-630.359	41.6125	-14.9605	1.14621e-24	1.45486e-21	45.4879
AHCYL2	-30175.8	4475.45	-14.8884	1.5182e-24	1.88602e-21	45.2156
CHP2	-17838.7	1489.92	-14.8515	1.75369e-24	2.13319e-21	45.0759
LRRN2	-1896.28	206.5	-14.7498	2.61041e-24	3.11049e-21	44.6904
OTOP3	-159.429	7.55	-14.6124	4.48014e-24	5.23164e-21	44.1668
PHLPP2	-6604.05	1187.6	-14.529	6.2238e-24	7.12528e-21	43.848
FIGF	-146.563	12.6	-14.457	8.27311e-24	9.28927e-21	43.5719
RP11-521D12.4	-33.4199	1.5	-14.3687	1.17422e-23	1.29357e-20	43.2321
AQP8	-116735	4759.38	-14.2282	2.05348e-23	2.22031e-20	42.6896
CA1	-55390.6	2251.89	-14.1571	2.72722e-23	2.89517e-20	42.4141
AP001627.1	-211.732	14.875	-14.1223	3.13411e-23	3.2677e-20	42.2791
TMEM37	-7205.38	899.487	-14.0735	3.81001e-23	3.90272e-20	42.0894
GCNT2	-1208	133.3	-14.0628	3.97826e-23	4.0048e-20	42.0474
C2orf88	-4228.49	526.413	-14.0398	4.36148e-23	4.31616e-20	41.9581
SLC30A10	-2416.53	100.088	-14.0049	5.01788e-23	4.88298e-20	41.8219
TMEM236	-6029.28	708.15	-13.9851	5.4333e-23	5.20056e-20	41.7446
SLC22A5	-3980.68	1178.92	-13.973	5.70461e-23	5.34216e-20	41.6973
MT1G	-14142.7	1351.65	-13.9704	5.76423e-23	5.34216e-20	41.6872
DAO	-177.42	10.9	-13.9628	5.94207e-23	5.42094e-20	41.6577
SLC23A1	-815.368	118.875	-13.8984	7.70179e-23	6.91822e-20	41.4056
LDHD	-4436.55	584.825	-13.8582	9.05685e-23	8.01216e-20	41.2481
AC104024.1	-34.1385	3.475	-13.8539	9.21337e-23	8.02897e-20	41.2315
TSPAN7	-4784.35	762.062	-13.8143	1.08091e-22	9.28107e-20	41.0762
PDE9A	-10576.6	1429.03	-13.7147	1.61764e-22	1.36883e-19	40.6843
CDKN2B	-7521.47	981.587	-13.7022	1.70145e-22	1.41918e-19	40.6352
NR1H4	-1168.26	97.8875	-13.6834	1.83604e-22	1.50987e-19	40.5611
EPB41L3	-4330.63	686.438	-13.6123	2.45078e-22	1.98742e-19	40.2803
TMCC3	-7003.65	1408.99	-13.6011	2.56529e-22	2.05178e-19	40.2359
DHRS11	-7307.53	1647.5	-13.5966	2.61196e-22	2.06088e-19	40.2183
ZG16	-46769.1	2500.06	-13.5504	3.15303e-22	2.45461e-19	40.0352
HPSE2	-275.996	34.6875	-13.4417	4.91163e-22	3.77336e-19	39.604
IL6R	-4098.65	648.388	-13.3998	5.82854e-22	4.41962e-19	39.4374
AC007182.6	-317.29	20.275	-13.3846	6.203e-22	4.61641e-19	39.3768
MEP1B	-1922.66	109.775	-13.3829	6.2462e-22	4.61641e-19	39.3701
SLC25A47P1	-9.68831	0.675	-13.3765	6.41363e-22	4.68091e-19	39.3443
CWH43	-1789.93	156.863	-13.3069	8.5303e-22	6.14888e-19	39.0667
TAT	-244.372	16.125	-13.2854	9.31621e-22	6.63348e-19	38.9809
MT1H	-2448.91	153.588	-13.2757	9.69343e-22	6.81892e-19	38.9423
TUBAL3	-1976.34	273.775	-13.2009	1.31849e-21	9.16458e-19	38.6428
HPGDS	-212.866	41.45	-12.9993	3.03021e-21	2.08147e-18	37.8323
RN7SKP127	-74.5758	3.8875	-12.9887	3.16644e-21	2.14976e-18	37.7895
IGHV1-58	-1073.68	84.9125	-12.9647	3.49631e-21	2.34643e-18	37.6929
MT1M	-3032.03	221.675	-12.8579	5.44677e-21	3.61387e-18	37.261
UGP2	-14524.6	4970.02	-12.7925	7.15077e-21	4.69115e-18	36.9957
RP11-319C21.1	-7.58874	0.3625	-12.7351	9.0817e-21	5.8917e-18	36.7627
SCARA5	-4032.87	282.363	-12.7258	9.43999e-21	6.05684e-18	36.7249
SLAMF6P1	-87.5714	10.7125	-12.6909	1.09234e-20	6.93246e-18	36.5826
CTD-2385L22.2	-122.965	9.3125	-12.6446	1.32541e-20	8.32118e-18	36.3941
CTC-490G23.2	-451.264	41.325	-12.6294	1.41227e-20	8.77213e-18	36.3322
HSD3BP2	-72.6883	3.0375	-12.6231	1.44988e-20	8.91099e-18	36.3066
CTSLP8	-4.56277	0.275	-12.5434	2.02518e-20	1.23171e-17	35.9807
HSD3B2	-3265.65	133.812	-12.5258	2.17974e-20	1.31205e-17	35.9089
ENTPD5	-16513.6	3261.62	-12.437	3.16559e-20	1.88601e-17	35.545
ABCG2	-8897.29	474.363	-12.3913	3.83701e-20	2.26294e-17	35.3573
SLC26A3	-254664	17338.4	-12.2266	7.6903e-20	4.49013e-17	34.6789
KRTAP13-2	-178.156	7.525	-12.1878	9.06176e-20	5.23851e-17	34.5187
UGT2B17	-35673.8	2337.65	-12.1819	9.28881e-20	5.31712e-17	34.4945
SLC20A1	-14224.1	3277.3	-12.1655	9.96029e-20	5.61326e-17	34.4264
TNFRSF17	-529.753	75.1125	-12.1646	9.99844e-20	5.61326e-17	34.4227
DHRS7C	-7.68831	0.6	-12.1451	1.08557e-19	6.03652e-17	34.3424
IGJ	-161771	16521.7	-12.0708	1.48847e-19	8.19879e-17	34.0342
CD177P1	-348.394	14.3375	-11.9479	2.51048e-19	1.3699e-16	33.5238
CLCA4	-81557	4237.7	-11.9028	3.04185e-19	1.64449e-16	33.3363
ABCB11	-693.623	33.3875	-11.8984	3.10027e-19	1.66069e-16	33.3177
TINCR	-412.749	44.0625	-11.871	3.4838e-19	1.84917e-16	33.2038
CD163L1	-2431.77	284.75	-11.8585	3.67483e-19	1.93299e-16	33.1517
RP11-747D18.1	-160.082	13.5875	-11.8122	4.47909e-19	2.33501e-16	32.9583
GCG	-711.359	36.65	-11.7943	4.83663e-19	2.49908e-16	32.8833
SCGN	-642.251	49.5	-11.7523	5.78687e-19	2.94136e-16	32.7081
LRRC19	-6965.47	1355.4	-11.7521	5.79336e-19	2.94136e-16	32.707
RNF152	-2968.38	404.6	-11.7001	7.23963e-19	3.64397e-16	32.4893
RP11-202A13.1	-19.6364	2.1	-11.6902	7.5538e-19	3.7696e-16	32.4478
RP11-671J11.4	-4.07359	0.4125	-11.6691	8.26951e-19	4.0918e-16	32.3593
MOGAT2	-6311.8	930.225	-11.6313	9.72288e-19	4.7705e-16	32.2011
RP11-62C3.10	-0.666667	0.025	-11.599	1.11723e-18	5.436e-16	32.0653
PYY	-2431.87	101.987	-11.5328	1.48506e-18	7.16595e-16	31.7872
HSD17B2	-10541.1	1104.24	-11.5216	1.55863e-18	7.45932e-16	31.7399
FABP2	-2709.54	385.4	-11.4778	1.88214e-18	8.93433e-16	31.5556
SLC16A9	-4583.35	748.525	-11.4624	2.01172e-18	9.47242e-16	31.4905
AC106869.2	-52.8398	4.475	-11.3967	2.67067e-18	1.24746e-15	31.2135
CLEC3B	-1177.12	150.688	-11.3792	2.88017e-18	1.33464e-15	31.1397
GPT	-3504.45	444.3	-11.3592	3.1404e-18	1.43404e-15	31.0551
ENPP6	-82.9957	13.45	-11.3589	3.1438e-18	1.43404e-15	31.054
PDCD4	-15943.4	4696.8	-11.1705	7.10881e-18	3.21753e-15	30.2562
C1orf115	-7102.79	1657.56	-11.1586	7.48819e-18	3.36318e-15	30.2054
PDE6A	-589.234	61.8625	-11.1348	8.30338e-18	3.70083e-15	30.1043
NPY2R	-62.6234	4.725	-11.0769	1.06781e-17	4.72322e-15	29.8583
KCNE2	-32.9481	5.2875	-11.0725	1.08828e-17	4.77756e-15	29.8397
PADI2	-28429	3854.75	-11.0691	1.10462e-17	4.81308e-15	29.8252
IGLV5-37	-271.463	22.05	-11.0136	1.40638e-17	6.08254e-15	29.5889
RP11-209E8.1	-40.658	3.2	-10.9913	1.55021e-17	6.6553e-15	29.4937
RP11-1090M7.1	-55.5152	4.9	-10.9604	1.77353e-17	7.55848e-15	29.362
AC103563.5	-54.5022	5.875	-10.9417	1.92393e-17	8.14004e-15	29.2824
SEMA6D	-1954.93	372.05	-10.9371	1.96306e-17	8.24584e-15	29.2627
GUCA2B	-3997.31	178.925	-10.8541	2.81976e-17	1.17377e-14	28.9084
TMEM72	-1061.37	86.7625	-10.8529	2.83455e-17	1.17377e-14	28.9032
NR3C2	-5459.36	1064.36	-10.8334	3.08755e-17	1.26952e-14	28.8196
APPL2	-8198.74	2907.71	-10.831	3.11902e-17	1.2735e-14	28.8097
PDK4	-8404.3	1394.86	-10.7655	4.15528e-17	1.68482e-14	28.529
MS4A10	-134.61	7.4375	-10.7477	4.4901e-17	1.80802e-14	28.4531
SLC6A19	-2285.93	122.463	-10.7411	4.62191e-17	1.84835e-14	28.4248
PRKG2	-1308.81	92.9375	-10.7171	5.13432e-17	2.0393e-14	28.3219
TRPM6	-7957.9	673.85	-10.6877	5.84044e-17	2.30409e-14	28.1958
SCNN1G	-1370.19	79.1875	-10.663	6.50858e-17	2.55045e-14	28.0898
ZNF575	-655.472	155.775	-10.6463	7.00463e-17	2.72653e-14	28.0179
G6PC	-77.9091	4.0125	-10.6432	7.10019e-17	2.74542e-14	28.0047
RP11-2I17.4	-27.4286	3.6	-10.5751	9.57513e-17	3.67805e-14	27.712
KCNG3	-80.9264	11.775	-10.5712	9.73815e-17	3.71622e-14	27.6954
PCSK5	-2964.25	587.913	-10.568	9.87488e-17	3.74393e-14	27.6818
OR2S1P	-40.4632	8.3875	-10.5536	1.05212e-16	3.96324e-14	27.6197
MT1CP	-10.5498	0.5125	-10.5356	1.13895e-16	4.26281e-14	27.5421
ASPA	-206.316	29.0875	-10.4951	1.36079e-16	5.06067e-14	27.3679
DNASE1L3	-874.325	105.463	-10.423	1.86859e-16	6.90514e-14	27.0575
RETSAT	-17772.7	5205.74	-10.42	1.89385e-16	6.95449e-14	27.0443
P2RX2	-72.4026	5.3125	-10.3976	2.09033e-16	7.628e-14	26.9477
TMEM100	-435.485	51.5125	-10.3665	2.39771e-16	8.69535e-14	26.8134
ARHGAP20	-195.978	44.0375	-10.2741	3.60308e-16	1.2986e-13	26.4146
SCNN1B	-9648.37	562.112	-10.234	4.30221e-16	1.54106e-13	26.241
UGT2B15	-2445.96	211.762	-10.2289	4.39924e-16	1.56621e-13	26.2192
KHDRBS2	-29.2597	2.8375	-10.1444	6.39427e-16	2.26268e-13	25.853
TMEM82	-803.589	99.2125	-10.113	7.34508e-16	2.58348e-13	25.7172
PCSK2	-190.074	14.3875	-10.0929	8.03098e-16	2.80436e-13	25.6298
RP11-420K14.1	-4.81818	0.3625	-10.0918	8.06913e-16	2.80436e-13	25.6251
IGHA2	-230318	25286.6	-10.0655	9.0639e-16	3.13144e-13	25.5113
CNTFR	-1016.75	96.375	-10.0429	1.00183e-15	3.44082e-13	25.4132
ETFDH	-2683.77	938.2	-10.039	1.01954e-15	3.48118e-13	25.3961
CHAT	-26.9091	2.1	-10.0142	1.13805e-15	3.86322e-13	25.2884
PEX26	-9084.27	3266.72	-9.99716	1.22721e-15	4.14181e-13	25.2145
MT1HL1	-1.88312	0.1875	-9.99314	1.2493e-15	4.19212e-13	25.197
APOBEC3A	-636.784	54.7625	-9.94848	1.52295e-15	5.08116e-13	25.0031
CLDN23	-6294.15	922.55	-9.93857	1.59138e-15	5.25926e-13	24.96
RP11-349K16.1	-365.688	80.025	-9.93815	1.59434e-15	5.25926e-13	24.9582
SH2D7	-306.152	30.6625	-9.93014	1.65208e-15	5.41909e-13	24.9233
ADAMDEC1	-13892.5	1506.42	-9.92166	1.71537e-15	5.57887e-13	24.8865
RP11-406A20.1	-2.92208	0.1875	-9.92107	1.7199e-15	5.57887e-13	24.8839
SLCO4C1	-191.355	25.4875	-9.89451	1.93511e-15	6.24228e-13	24.7685
XXbac-B476C20.9	-332.498	83.6375	-9.88371	2.03022e-15	6.5131e-13	24.7215
SGCG	-28.342	3.3875	-9.85571	2.29906e-15	7.33525e-13	24.5997
HHLA2	-9547.21	1738.47	-9.82917	2.58676e-15	8.20834e-13	24.4842
CHAD	-395.121	60.3625	-9.81878	2.70897e-15	8.54967e-13	24.439
CEACAM1	-47577.5	10557.7	-9.78787	3.10794e-15	9.75608e-13	24.3044
ACADS	-8637	2168.22	-9.77347	3.31348e-15	1.03457e-12	24.2417
CDH10	-13.4502	1.3875	-9.76765	3.40023e-15	1.05601e-12	24.2163
ACKR2	-205.641	40.7375	-9.74244	3.80379e-15	1.17509e-12	24.1065
OR8D1	-3.88312	0.2625	-9.72734	4.06808e-15	1.25012e-12	24.0407
SLC17A1	-38.5065	5.9375	-9.60015	7.16674e-15	2.19081e-12	23.486
BEST2	-1504.38	115.037	-9.58217	7.76454e-15	2.358e-12	23.4075
SLC36A1	-3245.64	1224.74	-9.58131	7.79446e-15	2.358e-12	23.4037
RSPO2	-238.961	25	-9.5728	8.09542e-15	2.43643e-12	23.3666
RP11-467J12.4	-33.0087	4.5625	-9.54883	9.00845e-15	2.69732e-12	23.2619
SST	-481.372	29.0125	-9.47574	1.24796e-14	3.71759e-12	22.9426
CDC14A	-1088.85	357.312	-9.46698	1.2977e-14	3.84613e-12	22.9043
EDN2	-317.524	48.05	-9.44815	1.41142e-14	4.16206e-12	22.822
RP11-1151B14.4	-6.38961	0.85	-9.40321	1.72489e-14	5.06086e-12	22.6255
ACOX1	-14391.7	5280.35	-9.39191	1.81411e-14	5.29602e-12	22.5761
FABP1	-149073	24814.5	-9.35944	2.09715e-14	6.09184e-12	22.4341
RP11-325F22.2	-85.7143	16.5	-9.35793	2.11131e-14	6.10264e-12	22.4275
ELANE	-36.6104	3.7625	-9.35516	2.13759e-14	6.14815e-12	22.4154
CHGA	-13580.6	642.975	-9.33759	2.31217e-14	6.61768e-12	22.3385
TP53INP2	-10776.8	2356.7	-9.33352	2.35455e-14	6.70609e-12	22.3207
AVPR1B	-11.0433	1.0375	-9.32876	2.40509e-14	6.81681e-12	22.2999
RP11-407N17.3	-27.4502	2.9125	-9.32605	2.43446e-14	6.86672e-12	22.288
RP11-781P6.1	-1.92208	0.15	-9.32146	2.48483e-14	6.97507e-12	22.2679
AC116035.1	-6.61905	0.9625	-9.30254	2.70398e-14	7.55393e-12	22.1851
RP11-296E3.2	-40.6234	10.9	-9.29742	2.76654e-14	7.69191e-12	22.1627
NAAA	-5301.59	1559.89	-9.26274	3.23027e-14	8.93867e-12	22.0109
FUCA1	-9665.01	3590.43	-9.2278	3.77622e-14	1.04001e-11	21.8579
MT1X	-4209	872.175	-9.21917	3.92471e-14	1.07168e-11	21.8201
ANO5	-434.372	73.25	-9.21896	3.92844e-14	1.07168e-11	21.8192
NR5A2	-2020.56	591.875	-9.21795	3.94627e-14	1.07168e-11	21.8147
MIA2	-57.8398	7.6625	-9.21141	4.06333e-14	1.09836e-11	21.7861
RP4-811M8.1	-39.2208	4.25	-9.19506	4.37134e-14	1.17617e-11	21.7145
TDP2	-11684.8	4448.05	-9.17763	4.72573e-14	1.26569e-11	21.6381
BTNL8	-4420.98	558.138	-9.14003	5.59116e-14	1.49064e-11	21.4734
PLCD1	-3668.28	902.612	-9.12766	5.90907e-14	1.56824e-11	21.4192
RP11-317J10.2	-105.978	16.6625	-9.12657	5.93812e-14	1.56882e-11	21.4144
RP11-646E18.2	-6.18615	0.7125	-9.12234	6.05138e-14	1.58636e-11	21.3959
AL928768.3	-124.152	13.8375	-9.12207	6.05884e-14	1.58636e-11	21.3947
SLC5A11	-84.7792	14.4	-9.09901	6.71714e-14	1.75087e-11	21.2936
TMEM253	-309.004	57.25	-9.07877	7.35366e-14	1.90826e-11	21.2049
RBKS	-412.052	204.4	-9.07169	7.59022e-14	1.96093e-11	21.1739
WDR78	-749.182	188.912	-9.04885	8.40713e-14	2.16241e-11	21.0737
HS3ST6	-21.1775	1.95	-9.04681	8.48408e-14	2.17263e-11	21.0648
GRAMD3	-2316.01	1060.84	-9.03735	8.85107e-14	2.25671e-11	21.0233
HIGD1A	-6908.32	2800.07	-9.03436	8.97011e-14	2.27086e-11	21.0102
IGHV3-36	-21.4329	2.0375	-9.03401	8.98433e-14	2.27086e-11	21.0087
RP11-779O18.3	-5.91342	0.975	-9.0252	9.3455e-14	2.35196e-11	20.9701
MXI1	-5177.18	2077.3	-9.01118	9.95071e-14	2.49353e-11	20.9086
SMPDL3A	-4746.42	1002.9	-9.00119	1.04057e-13	2.59641e-11	20.8648
RERGL	-182.152	15.0125	-8.98122	1.13787e-13	2.8271e-11	20.7772
GFRA2	-318.654	36.9625	-8.96432	1.22728e-13	3.03633e-11	20.7031
UGT2A3	-5060.8	652.312	-8.9483	1.31853e-13	3.24832e-11	20.6328
SECTM1	-8707.23	1280.96	-8.9373	1.38511e-13	3.398e-11	20.5846
RMDN2	-714.312	269.475	-8.9207	1.49194e-13	3.64477e-11	20.5118
METTL7A	-9703.03	2402.84	-8.89201	1.69648e-13	4.12719e-11	20.3859
FLVCR2	-1124.01	266.137	-8.87921	1.79654e-13	4.34492e-11	20.3298
RP11-249C24.11	-3.22944	0.225	-8.87794	1.80675e-13	4.34492e-11	20.3242
SLC9A3	-32039.1	2205.05	-8.87775	1.80831e-13	4.34492e-11	20.3234
FAM180B	-43.303	2.9875	-8.87481	1.83232e-13	4.38458e-11	20.3105
CYP2B7P	-668.056	53.6625	-8.85998	1.95805e-13	4.66631e-11	20.2454
SLC17A7	-85.8745	15.0125	-8.8449	2.09487e-13	4.97209e-11	20.1793
CHP1	-16232.4	6415.64	-8.83056	2.23386e-13	5.2805e-11	20.1163
SGK2	-4493.42	1259.75	-8.82269	2.31399e-13	5.44787e-11	20.0818
RP4-651E10.4	-39.4286	5.05	-8.74213	3.3193e-13	7.78329e-11	19.7284
SLC52A1	-233.307	48.775	-8.73676	3.40014e-13	7.94095e-11	19.7048
IGHV3-38	-83.2684	13.1875	-8.7171	3.71323e-13	8.60802e-11	19.6185
ADTRP	-5576.78	830.013	-8.71698	3.71525e-13	8.60802e-11	19.618
RP11-640L9.2	-119.281	22.525	-8.71316	3.77923e-13	8.72166e-11	19.6012
HSD3BP1	-3.48485	0.3125	-8.70876	3.85453e-13	8.86041e-11	19.5819
KLF4	-17817.5	3720.69	-8.7063	3.89715e-13	8.92324e-11	19.5711
HTR7	-46.9827	10.1125	-8.68361	4.31409e-13	9.83933e-11	19.4716
FAM47E-STBD1	-319.405	94.9062	-8.68198	4.34582e-13	9.87314e-11	19.4644
GLP2R	-428.887	60.8625	-8.67914	4.40139e-13	9.96061e-11	19.4519
MOBP	-54.1948	6.8375	-8.66296	4.7322e-13	1.06679e-10	19.3809
IGLC4	-2.77922	0.325	-8.65225	4.96477e-13	1.11491e-10	19.3339
TPH1	-481.264	42.45	-8.61676	5.82017e-13	1.302e-10	19.1782
PBLD	-5109.09	1318.5	-8.59703	6.3581e-13	1.41691e-10	19.0916
RP11-96D1.6	-76.3939	13.1375	-8.58937	6.57992e-13	1.45958e-10	19.058
TNXB	-4704.23	544.513	-8.58871	6.59956e-13	1.45958e-10	19.0551
ASPG	-452.571	58.4	-8.58061	6.84342e-13	1.5078e-10	19.0196
WARSP1	-4.11255	0.375	-8.57574	6.9942e-13	1.53523e-10	18.9982
PP7080	-26502.1	2456.44	-8.53021	8.57675e-13	1.87296e-10	18.7984
RP11-467L13.4	-50.3593	2.8625	-8.52968	8.59701e-13	1.87296e-10	18.7961
BLOC1S5-TXNDC5	-21.6277	5.85	-8.51186	9.31146e-13	2.02107e-10	18.7179
RXRG	-57.2857	6.8625	-8.4922	1.01682e-12	2.19886e-10	18.6317
TMEM220	-520.524	142.662	-8.47822	1.08256e-12	2.33238e-10	18.5703
RNU6-132P	-0.987013	0.05	-8.47394	1.10348e-12	2.3687e-10	18.5516
CTD-2588E21.1	-25.6407	6.9875	-8.46832	1.13162e-12	2.42022e-10	18.5269
LIFR	-1203.97	224.175	-8.45016	1.22753e-12	2.61575e-10	18.4472
SRI	-21732.6	8156.34	-8.43366	1.32166e-12	2.80609e-10	18.3749
NAP1L2	-137.922	23.25	-8.43001	1.34342e-12	2.84197e-10	18.3589
GPR15	-243.571	35.5625	-8.41185	1.45721e-12	3.07157e-10	18.2792
SLC25A20	-1907.5	899.7	-8.38834	1.61904e-12	3.4004e-10	18.1761
RNU6-140P	-20.2294	2.8625	-8.38504	1.64314e-12	3.43864e-10	18.1616
ABCA8	-1630.75	149.738	-8.38058	1.67624e-12	3.49539e-10	18.1421
HSD11B2	-23493.1	5680.52	-8.36428	1.80316e-12	3.74665e-10	18.0706
AKR1B10	-6911.65	974.2	-8.35438	1.88486e-12	3.90252e-10	18.0272
BMP2	-3325.14	824.55	-8.34063	2.00458e-12	4.13575e-10	17.9669
ABHD3	-5884.98	1669.04	-8.33635	2.04335e-12	4.19806e-10	17.9481
ABCC13	-375.805	58.2875	-8.33571	2.04917e-12	4.19806e-10	17.9453
TMEM171	-3837.64	804.938	-8.33376	2.06722e-12	4.22024e-10	17.9367
TNFRSF13B	-168.221	26.0875	-8.31489	2.24942e-12	4.57619e-10	17.854
DNAJC19P3	-1.61472	0.1125	-8.30857	2.3139e-12	4.69103e-10	17.8263
EDN3	-2701.71	407.938	-8.29899	2.41534e-12	4.87974e-10	17.7843
MIER3	-6865.05	2105.39	-8.29657	2.44164e-12	4.89996e-10	17.7737
LGI1	-115.156	8.1625	-8.29652	2.44213e-12	4.89996e-10	17.7735
LILRB5	-683.147	117.138	-8.28658	2.55329e-12	5.10544e-10	17.7299
PCDH20	-18.7338	4.46875	-8.27273	2.71657e-12	5.41339e-10	17.6692
RP11-654D12.2	-10.7359	1	-8.26724	2.78411e-12	5.52911e-10	17.6452
IGHV3-7	-439.338	65.1375	-8.26229	2.84648e-12	5.63381e-10	17.6235
SPPL2A	-5523.96	2906.19	-8.25362	2.95908e-12	5.83689e-10	17.5855
ACAA2	-13315.6	5320.69	-8.22457	3.36986e-12	6.62479e-10	17.4582
SPOCK3	-32.5498	4.3375	-8.19732	3.80678e-12	7.45861e-10	17.3388
TLR3	-1331.91	452.038	-8.18149	4.08621e-12	7.97932e-10	17.2694
IGHV3-35	-106.797	15.875	-8.15776	4.54384e-12	8.84337e-10	17.1655
B3GALT1	-635.078	92.7375	-8.14817	4.74285e-12	9.20002e-10	17.1235
TMEM151B	-47.8009	8.325	-8.08239	6.36468e-12	1.23051e-09	16.8355
MT1JP	-12.5931	1.2125	-8.06257	6.95425e-12	1.34006e-09	16.7488
PAPSS2	-13458.7	4065.35	-8.0586	7.07886e-12	1.35958e-09	16.7314
RP11-432I5.8	-8.78788	1.875	-8.04392	7.55876e-12	1.44699e-09	16.6672
OPN3	-1023.07	371.625	-8.02911	8.07608e-12	1.54097e-09	16.6024
RP11-855A2.5	-11.6407	1.4625	-8.01667	8.53778e-12	1.62376e-09	16.5479
FAM43A	-1761.71	560.35	-8.01457	8.61802e-12	1.6337e-09	16.5388
C15orf48	-20182.9	5617.25	-7.99778	9.28955e-12	1.7553e-09	16.4653
CNGB1	-29.7922	5.325	-7.99066	9.5896e-12	1.80615e-09	16.4342
LINC00682	-11.961	1.4875	-7.98759	9.7219e-12	1.82519e-09	16.4208
KIAA1683	-547.03	107.15	-7.98588	9.79652e-12	1.82994e-09	16.4133
CNTN4	-519.84	125.987	-7.98557	9.8099e-12	1.82994e-09	16.412
AC073283.4	-165.221	53.975	-7.97828	1.01345e-11	1.88447e-09	16.3801
RP11-528A4.2	-174.139	54.725	-7.96614	1.06992e-11	1.98315e-09	16.327
GAPDHP74	-8.89177	0.775	-7.96534	1.07379e-11	1.98402e-09	16.3235
LYVE1	-1592.51	172.875	-7.95628	1.11808e-11	2.05936e-09	16.2839
SLC22A4	-355.242	133.412	-7.94634	1.16884e-11	2.14607e-09	16.2404
GPR37L1	-349.606	99.8375	-7.9364	1.2219e-11	2.23614e-09	16.197
PAQR5	-3313.84	968.425	-7.93573	1.22556e-11	2.23614e-09	16.194
CTC-428G20.6	-30.5584	11.5875	-7.93497	1.22971e-11	2.23673e-09	16.1907
ENHO	-100.165	17.925	-7.92593	1.28037e-11	2.32165e-09	16.1512
ETHE1	-12768.2	5122.29	-7.91555	1.34109e-11	2.42422e-09	16.1059
GDPD2	-1277.38	156.188	-7.9103	1.37283e-11	2.47394e-09	16.083
IGLV4-69	-2785.17	423.938	-7.90548	1.40274e-11	2.52006e-09	16.0619
SULT1B1	-17249.5	3759.97	-7.89582	1.46454e-11	2.623e-09	16.0197
CTB-118N6.2	-9.80087	1.9	-7.87804	1.58547e-11	2.83091e-09	15.942
PTGDR2	-786.312	74.175	-7.86377	1.68967e-11	3.00776e-09	15.8797
PLCL2	-1395.73	359.275	-7.86292	1.6961e-11	3.01003e-09	15.876
RP11-356O9.2	-76.3074	9.8875	-7.83944	1.88336e-11	3.33224e-09	15.7735
XXyac-YM21GA2.3	-3.57576	0.225	-7.83329	1.93568e-11	3.41445e-09	15.7467
ITM2C	-80503.6	22695.3	-7.82465	2.0117e-11	3.53786e-09	15.709
HHATL-AS1	-4.91775	0.6	-7.81836	2.06893e-11	3.62758e-09	15.6815
MIR22HG	-1474	502.938	-7.81512	2.09905e-11	3.65861e-09	15.6674
TMEM220-AS1	-151.121	33.2125	-7.81511	2.09916e-11	3.65861e-09	15.6673
RDH5	-320.407	95.275	-7.80432	2.20261e-11	3.82553e-09	15.6202
PLCE1	-4539.32	1494.24	-7.80377	2.20803e-11	3.82553e-09	15.6178
SLC38A4	-1433.14	258.938	-7.79149	2.33224e-11	4.02877e-09	15.5643
ADORA3	-656.515	106.438	-7.78357	2.41598e-11	4.16111e-09	15.5297
CLDN8	-1799.45	91.025	-7.77061	2.55966e-11	4.39561e-09	15.4732
MALL	-1841.67	463.725	-7.7667	2.60467e-11	4.45979e-09	15.4561
HTR4	-210.922	35.9875	-7.7571	2.7185e-11	4.63548e-09	15.4143
TRIM9	-333.732	55.45	-7.75671	2.72316e-11	4.63548e-09	15.4126
RUNDC3B	-498.545	110.15	-7.73801	2.95974e-11	5.02355e-09	15.3311
CNNM4	-9280.03	3823.64	-7.72011	3.20545e-11	5.42483e-09	15.253
ANPEP	-67452.4	5793.11	-7.71427	3.28977e-11	5.55144e-09	15.2276
FAM46C	-3937.61	1044.71	-7.7103	3.34858e-11	5.6344e-09	15.2103
ZBTB7B	-8563.64	3684.16	-7.67891	3.8506e-11	6.46048e-09	15.0736
IGKV2-30	-310.814	55.175	-7.67401	3.93556e-11	6.58412e-09	15.0522
GRIN3A	-97.0043	38.3	-7.67285	3.95601e-11	6.59942e-09	15.0472
RP11-527L4.6	-2.39394	0.3625	-7.67085	3.99126e-11	6.63926e-09	15.0385
DPEP3	-11.0736	2.675	-7.66759	4.04961e-11	6.71718e-09	15.0243
PPAP2A	-3060.78	1200.66	-7.65549	4.27364e-11	7.06869e-09	14.9716
RP11-725G5.2	-17.6926	4.6375	-7.6519	4.34235e-11	7.16206e-09	14.956
GNA11	-14522	5922.94	-7.65119	4.35619e-11	7.16464e-09	14.9529
SEMA6A	-5055.68	1290.58	-7.64892	4.40029e-11	7.21685e-09	14.943
IGHV3-22	-21.5281	3.6125	-7.61946	5.01643e-11	8.20432e-09	14.8148
PKHD1L1	-127.97	19.1625	-7.59132	5.68486e-11	9.27157e-09	14.6924
ALPI	-1388.08	139.637	-7.59034	5.70981e-11	9.28631e-09	14.6882
MUSK	-87.342	11.6	-7.56165	6.48609e-11	1.05195e-08	14.5634
SLC3A1	-2622.58	690.1	-7.53407	7.33125e-11	1.18573e-08	14.4436
SLC22A18AS	-1051.17	312.25	-7.51607	7.94103e-11	1.28081e-08	14.3655
KRT20	-67474.4	14943.2	-7.49153	8.85499e-11	1.42429e-08	14.2589
PI16	-944.095	88.975	-7.47835	9.38801e-11	1.50587e-08	14.2018
CYP2C18	-606.563	116.85	-7.4777	9.41518e-11	1.50609e-08	14.1989
SLC1A1	-4065.34	1003.11	-7.47349	9.59275e-11	1.53031e-08	14.1807
AC073834.3	-0.65368	0.0375	-7.46431	9.99137e-11	1.58523e-08	14.1408
AC092684.1	-0.65368	0.0375	-7.46431	9.99137e-11	1.58523e-08	14.1408
AC007556.3	-16.1905	1.75	-7.46257	1.0069e-10	1.59322e-08	14.1333
CTD-2023N9.1	-3.74026	0.4	-7.45653	1.03423e-10	1.63204e-08	14.1071
KRT12	-97.5628	25.7625	-7.44604	1.08343e-10	1.70508e-08	14.0616
RP13-672B3.2	-9.48052	1.875	-7.438	1.12276e-10	1.76221e-08	14.0267
PIGZ	-5651.47	1541.12	-7.42937	1.16656e-10	1.82606e-08	13.9893
SLC35G1	-1032.16	474.212	-7.42445	1.19228e-10	1.86133e-08	13.968
PTPRR	-2186.33	497.325	-7.42256	1.20231e-10	1.87198e-08	13.9598
SSTR2	-154.758	48.7125	-7.41424	1.24745e-10	1.9371e-08	13.9238
IGHV3-37	-18.7273	2.975	-7.4118	1.26102e-10	1.95298e-08	13.9132
FAM151A	-221.19	66.4375	-7.41014	1.27031e-10	1.96216e-08	13.906
FEV	-85.4935	6.7125	-7.39945	1.33194e-10	2.05193e-08	13.8597
IGLV3-17	-9.81385	0.8875	-7.39692	1.34693e-10	2.06956e-08	13.8487
ITGA8	-649.139	229.537	-7.3875	1.40429e-10	2.15203e-08	13.8079
IGKV6-21	-383.238	65.8	-7.38249	1.43583e-10	2.19461e-08	13.7862
NDRG1	-47712.9	15612.6	-7.37679	1.47249e-10	2.24476e-08	13.7616
CTC-297N7.9	-49.8528	8.35	-7.3539	1.62953e-10	2.47768e-08	13.6625
CNNM2	-1805.97	774.087	-7.34778	1.6743e-10	2.53915e-08	13.636
IGKV1OR2-108	-358.511	58.6	-7.33001	1.81124e-10	2.73971e-08	13.5591
UBE2FP1	-69.6623	24.95	-7.32334	1.86545e-10	2.81442e-08	13.5303
VIP	-1751.25	328.087	-7.31185	1.96265e-10	2.95344e-08	13.4806
ISX	-4934.5	1274.21	-7.30288	2.04204e-10	3.065e-08	13.4419
RP11-7F17.3	-14.3896	3.15	-7.30029	2.06559e-10	3.0924e-08	13.4307
CH507-210P18.4	-0.974026	0.0625	-7.29704	2.09543e-10	3.11276e-08	13.4166
RNU6-1022P	-0.974026	0.0625	-7.29704	2.09543e-10	3.11276e-08	13.4166
SNORA5	-0.974026	0.0625	-7.29704	2.09543e-10	3.11276e-08	13.4166
AC009133.17	-19.5844	4.15	-7.2965	2.10051e-10	3.11276e-08	13.4143
ASAP3	-1530.19	594.862	-7.29227	2.14014e-10	3.15746e-08	13.396
DDX60	-5917.99	1719.94	-7.29213	2.1415e-10	3.15746e-08	13.3954
ZZEF1	-8212.71	3393.6	-7.28181	2.24141e-10	3.29645e-08	13.3508
CTD-2184D3.3	-3.51082	0.2875	-7.25958	2.47263e-10	3.62653e-08	13.2548
SCUBE1	-511.229	140.275	-7.25907	2.47826e-10	3.62653e-08	13.2526
CASR	-28.3636	2.7	-7.25675	2.50373e-10	3.65464e-08	13.2426
LGALS4	-145885	48746.5	-7.24955	2.58468e-10	3.76339e-08	13.2115
UGDH	-9992.69	3607.7	-7.24864	2.59505e-10	3.76908e-08	13.2076
KIAA1211	-1907.71	520.825	-7.24555	2.63072e-10	3.81142e-08	13.1942
RP11-567C2.1	-43.9307	5.05	-7.23683	2.734e-10	3.95124e-08	13.1566
PLP1	-705.896	76.575	-7.21822	2.96794e-10	4.27875e-08	13.0763
EIF4E3	-2126.72	1053.36	-7.21723	2.98096e-10	4.28693e-08	13.0721
ATP6V0D2	-279.602	60.55	-7.21577	3.00031e-10	4.30416e-08	13.0657
LYPD8	-18955.9	2083.32	-7.21482	3.01287e-10	4.30945e-08	13.0617
CTD-2256P15.5	-15.645	3.275	-7.21424	3.02063e-10	4.30945e-08	13.0591
IGHV3-75	-22.5541	3.625	-7.21382	3.02615e-10	4.30945e-08	13.0574
RP11-94C24.13	-40.7446	9.45	-7.20689	3.12015e-10	4.43251e-08	13.0275
SUGCT	-423.701	134.188	-7.20342	3.16823e-10	4.4899e-08	13.0125
SLC13A1	-63.4892	3.225	-7.20216	3.18588e-10	4.50396e-08	13.0071
ANK3	-3158.98	1318.81	-7.20086	3.20428e-10	4.51904e-08	13.0015
ARHGAP44	-3727.29	927.487	-7.18435	3.44628e-10	4.84863e-08	12.9303
AC144831.1	-140.303	36.625	-7.18018	3.51024e-10	4.92674e-08	12.9123
APOBEC3B	-1327.52	441.6	-7.15184	3.97713e-10	5.56778e-08	12.7903
P2RX4	-3592.35	1671.36	-7.15133	3.98604e-10	5.56778e-08	12.7881
CNGA1	-681.338	175.213	-7.14189	4.15538e-10	5.79046e-08	12.7475
ABHD5	-962.056	563.688	-7.13804	4.22632e-10	5.87529e-08	12.7309
IGHV3-72	-2289.5	300.688	-7.1302	4.37489e-10	6.06738e-08	12.6971
RPL10L	-55.5411	12.875	-7.12261	4.52349e-10	6.2586e-08	12.6645
IGHJ3P	-65.5887	12.5375	-7.11908	4.59436e-10	6.34163e-08	12.6493
FGL2	-3320.07	934.1	-7.11306	4.71774e-10	6.49657e-08	12.6234
AC005626.3	-1.57576	0.15	-7.10817	4.82043e-10	6.62237e-08	12.6024
DPF3	-262.732	72.7875	-7.09156	5.18588e-10	7.1077e-08	12.531
C1orf177	-38.1212	8.975	-7.07818	5.50017e-10	7.52081e-08	12.4735
P2RY1	-1222.64	395.212	-7.07442	5.59196e-10	7.62845e-08	12.4573
PHGR1	-16334	4182.16	-7.06919	5.72182e-10	7.78741e-08	12.4349
MAMDC2	-1339.06	120.487	-7.06577	5.80853e-10	7.88704e-08	12.4202
CELA3B	-28.5584	3.5125	-7.04319	6.41453e-10	8.68967e-08	12.3233
CDHR5	-23636.6	5851.81	-7.0389	6.53658e-10	8.83453e-08	12.3048
LINC00507	-27.0519	1.9625	-7.03832	6.55338e-10	8.83677e-08	12.3023
IGKV1OR10-1	-13.2338	2.2625	-7.03572	6.62867e-10	8.9177e-08	12.2912
PLAC8	-13124.8	2188.36	-7.03267	6.718e-10	9.0171e-08	12.2781
PAG1	-4223.42	1523.29	-7.02942	6.81438e-10	9.12549e-08	12.2642
CASP7	-7275.2	3161.29	-7.01322	7.31705e-10	9.77622e-08	12.1947
AC245028.1	-4.64502	0.8625	-7.01006	7.41902e-10	9.88982e-08	12.1811
LINC01399	-11.9481	2.5	-7.00425	7.61082e-10	1.01224e-07	12.1562
RP1-117B12.4	-21.1082	4.35	-6.99668	7.86763e-10	1.04402e-07	12.1238
FMO4	-417.312	195.338	-6.98761	8.18733e-10	1.08398e-07	12.0849
NANOGP9	-3.30736	0.15	-6.98448	8.30022e-10	1.09644e-07	12.0715
HMOX1	-3421.13	1150.16	-6.97432	8.67848e-10	1.14382e-07	12.028
CIPC	-2182.55	1374.3	-6.97288	8.73361e-10	1.14849e-07	12.0218
SLC41A2	-2375.52	963.225	-6.96898	8.88403e-10	1.16564e-07	12.0051
RP11-350E12.4	-9.04329	1.9625	-6.96785	8.92815e-10	1.16881e-07	12.0003
IGLV1-50	-75.7576	13.75	-6.95075	9.62325e-10	1.25699e-07	11.9271
RP5-894D12.5	-6.19481	1.0375	-6.93962	1.0104e-09	1.31683e-07	11.8795
CCL8	-309.957	62	-6.92961	1.05568e-09	1.37278e-07	11.8367
MT1DP	-38.961	7.5	-6.91312	1.13472e-09	1.47228e-07	11.7662
IGKV3OR2-5	-14.5801	1.3	-6.9014	1.19447e-09	1.54637e-07	11.716
DEFB1	-517.61	111.8	-6.89773	1.2138e-09	1.56792e-07	11.7004
NMRK2	-6.18615	0.7125	-6.89538	1.22633e-09	1.58061e-07	11.6903
ADRA2A	-2045.3	541.062	-6.89382	1.23471e-09	1.58791e-07	11.6837
RP11-798K3.2	-42.0216	6.8875	-6.89262	1.24125e-09	1.59281e-07	11.6785
CA12	-24960.8	6203.86	-6.87491	1.3412e-09	1.7173e-07	11.6029
AC144831.3	-54.4199	16.2875	-6.86984	1.37123e-09	1.75191e-07	11.5813
RP11-35P15.1	-35.9827	5.7	-6.86883	1.3773e-09	1.75581e-07	11.577
CRHBP	-17.5931	5.4	-6.8633	1.41102e-09	1.79489e-07	11.5534
MEP1A	-23321.9	5765.69	-6.85928	1.43603e-09	1.82273e-07	11.5362
CHCHD4P2	-2.22944	0.1875	-6.85471	1.46502e-09	1.8555e-07	11.5167
IGHA1	-329143	50515.8	-6.84382	1.53635e-09	1.94162e-07	11.4703
CDCA4P2	-11.8571	0.5875	-6.8394	1.56636e-09	1.97528e-07	11.4514
HSD17B11	-8539.91	4998	-6.83843	1.57296e-09	1.97932e-07	11.4473
IGHV3OR16-6	-52.5022	8.8	-6.8371	1.58213e-09	1.98658e-07	11.4416
IGKV2-29	-431.805	56.3875	-6.82906	1.63868e-09	2.05317e-07	11.4074
FAM107A	-1460.77	206.338	-6.82005	1.70445e-09	2.131e-07	11.3689
RP11-473E2.4	-3.329	0.4625	-6.8137	1.75234e-09	2.18619e-07	11.3419
RP11-314A15.2	-2.74026	0.3625	-6.78422	1.9928e-09	2.48089e-07	11.2164
RP11-380P13.1	-17.9913	2.35	-6.77649	2.06103e-09	2.56037e-07	11.1835
NAALADL1	-1119.48	248.162	-6.75389	2.2743e-09	2.81931e-07	11.0874
MAL	-155.745	25.7625	-6.74579	2.35605e-09	2.91446e-07	11.053
RP11-554D14.4	-8.16017	1.8125	-6.73395	2.48065e-09	3.06211e-07	11.0027
DMRTA1	-111.429	15.75	-6.68424	3.07928e-09	3.79304e-07	10.7918
ZNF536	-96.8139	20.15	-6.67894	3.15094e-09	3.86904e-07	10.7693
MT1E	-7838.09	1408.84	-6.6787	3.15423e-09	3.86904e-07	10.7683
LRRC3B	-6.12987	1.1	-6.67296	3.23395e-09	3.9585e-07	10.7439
IGHD6-6	-1.88312	0.1875	-6.66861	3.29553e-09	4.02544e-07	10.7255
RP11-677M14.3	-111.16	36.675	-6.66744	3.3123e-09	4.03748e-07	10.7206
RIMKLA	-1415.94	524.163	-6.66448	3.35522e-09	4.08128e-07	10.708
RP11-92A5.2	-10.2727	1.1125	-6.66333	3.37206e-09	4.09323e-07	10.7032
GNG7	-525.286	129.412	-6.66088	3.40813e-09	4.12844e-07	10.6928
FAM107B	-3865.8	2044.5	-6.65775	3.45474e-09	4.17623e-07	10.6795
CLIC5	-7070.15	2621.31	-6.64925	3.58461e-09	4.32427e-07	10.6435
ETNK1	-9572.61	4237.36	-6.64543	3.64447e-09	4.38741e-07	10.6274
TMEFF2	-41.0866	5.7875	-6.63207	3.86196e-09	4.63967e-07	10.5708
AC079776.2	-4.77489	0.7375	-6.6168	4.12626e-09	4.94702e-07	10.5063
ABI3BP	-1528.52	401.137	-6.60753	4.29531e-09	5.13915e-07	10.4671
RP11-542M13.2	-80.4113	11.9375	-6.60643	4.31596e-09	5.14509e-07	10.4624
FAM187B2P	-8.7013	2.625	-6.60632	4.3179e-09	5.14509e-07	10.462
CTD-3193O13.1	-9.80087	1.9	-6.591	4.61427e-09	5.47797e-07	10.3972
ADH1B	-4703.63	458.087	-6.59091	4.61603e-09	5.47797e-07	10.3969
IGHV3-47	-52.4416	11.525	-6.58905	4.6533e-09	5.51099e-07	10.389
IGHV3OR16-13	-159.524	21.125	-6.58176	4.80269e-09	5.67641e-07	10.3582
SCN9A	-619.19	115.362	-6.57417	4.96306e-09	5.8541e-07	10.3262
ENAM	-46.2294	7.8375	-6.5729	4.9904e-09	5.87449e-07	10.3208
AL901608.1	-1.22944	0.15	-6.57047	5.043e-09	5.92431e-07	10.3106
ADHFE1	-114.528	30.1	-6.57002	5.05302e-09	5.92431e-07	10.3087
PDE8A	-3493.95	1902.74	-6.5688	5.07974e-09	5.9437e-07	10.3035
TLCD2	-1598.63	793.987	-6.56559	5.15064e-09	6.01461e-07	10.29
AC073900.4	-5.19913	0.6625	-6.56222	5.22629e-09	6.09076e-07	10.2758
MOCS1	-1160.73	412.8	-6.55488	5.39482e-09	6.26683e-07	10.2448
RP11-170L3.7	-62.5455	10.8	-6.55471	5.39883e-09	6.26683e-07	10.2441
SYT10	-21.1905	2.9375	-6.55294	5.44044e-09	6.3026e-07	10.2366
AC093642.1	-32.4502	5.1	-6.54199	5.70403e-09	6.59487e-07	10.1905
CADM3	-869.615	106.662	-6.5209	6.24829e-09	7.20986e-07	10.1017
IGHV3-50	-11.0909	1.325	-6.51878	6.30588e-09	7.26196e-07	10.0927
CTC-391G2.1	-1.8961	0.175	-6.4982	6.89177e-09	7.91361e-07	10.0061
AC092071.1	-1.84416	0.225	-6.49796	6.89885e-09	7.91361e-07	10.0051
CMBL	-9068.51	3372.22	-6.49727	6.91948e-09	7.92172e-07	10.0022
KLF9	-3258	1355.17	-6.49664	6.93813e-09	7.92753e-07	9.99956
LINC00836	-13.5758	0.6	-6.49048	7.12504e-09	8.12519e-07	9.97365
RP11-329N22.1	-0.961039	0.075	-6.48619	7.25805e-09	8.26073e-07	9.95562
P2RY4	-41.29	5.925	-6.45631	8.25589e-09	9.37815e-07	9.83006
BMP6	-270.541	81.9375	-6.45155	8.42676e-09	9.55366e-07	9.8101
LRRC66	-944.117	312.288	-6.45006	8.48094e-09	9.59597e-07	9.80385
LTK	-1275.85	249.662	-6.44963	8.49695e-09	9.59597e-07	9.80201
GDPD3	-2063	493.025	-6.44894	8.52213e-09	9.60582e-07	9.79913
SFRP1	-1466.58	180.088	-6.43573	9.02098e-09	1.01485e-06	9.74369
IGKV1D-32	-2.84416	0.2625	-6.43173	9.17737e-09	1.03046e-06	9.72694
CADM2	-91.1126	12.6375	-6.41945	9.67534e-09	1.08429e-06	9.67545
SEPP1	-19901.4	4025.61	-6.40381	1.03485e-08	1.1575e-06	9.60991
SIGLEC8	-290.416	38.475	-6.40144	1.04542e-08	1.16709e-06	9.60001
CPNE8	-864.126	277.613	-6.39557	1.07212e-08	1.19462e-06	9.57544
TRHDE	-432.675	111.55	-6.39407	1.07907e-08	1.20007e-06	9.56914
MIER1	-2881.17	2119.54	-6.39058	1.09539e-08	1.21591e-06	9.55451
HTR3E	-91.7229	11.05	-6.38408	1.12637e-08	1.24792e-06	9.52735
SULT1A1	-2618.42	908.1	-6.38006	1.14599e-08	1.26725e-06	9.51052
CD209	-1063.21	234.662	-6.36493	1.2229e-08	1.34975e-06	9.44724
IGLV2-34	-57.2294	10.25	-6.35829	1.25825e-08	1.38614e-06	9.41948
MYH15	-224.455	73.9625	-6.35763	1.26182e-08	1.38745e-06	9.41672
CTNND2	-52.9134	10.7375	-6.35229	1.29106e-08	1.41694e-06	9.3944
C4orf19	-1911.74	816.612	-6.33325	1.40088e-08	1.53458e-06	9.31488
KIAA0513	-2180.09	744.663	-6.33101	1.41436e-08	1.54645e-06	9.30556
EPB41L4B	-9681.84	4869.56	-6.33025	1.419e-08	1.54862e-06	9.30237
CFD	-4437.09	804.638	-6.32857	1.42921e-08	1.55685e-06	9.29539
IGKV3OR2-268	-93.8615	22.325	-6.32304	1.46351e-08	1.59125e-06	9.27228
SCIN	-4396.55	967.325	-6.31866	1.49119e-08	1.61832e-06	9.25404
AL365331.2	-6.60173	1.3125	-6.31064	1.54328e-08	1.67176e-06	9.22059
IGKV1-33	-237.584	16.325	-6.30789	1.56158e-08	1.68845e-06	9.20911
CES3	-7471.57	1811.61	-6.30538	1.57843e-08	1.70351e-06	9.19866
GFI1B	-54.5195	10.525	-6.30449	1.5845e-08	1.70691e-06	9.19492
HAPLN1	-266.519	98.475	-6.30205	1.60115e-08	1.72166e-06	9.18475
HMGCS2	-57682.1	12031	-6.29626	1.64125e-08	1.76154e-06	9.16066
RP3-400B16.1	-18.7316	5.6375	-6.29565	1.64555e-08	1.76291e-06	9.15811
LRRC1	-2800.24	1952.44	-6.29154	1.67474e-08	1.79089e-06	9.14099
IGHV4-39	-7014.32	1390.71	-6.2895	1.68942e-08	1.80329e-06	9.13249
MAS1L	-6.99134	0.9375	-6.28643	1.71178e-08	1.82383e-06	9.11968
CCDC158	-47.7359	16.3875	-6.27945	1.76363e-08	1.87565e-06	9.09062
SPATA31E1	-5.21212	0.65	-6.27788	1.77546e-08	1.8848e-06	9.08412
LITAF	-11005	6752.38	-6.27578	1.79149e-08	1.89837e-06	9.07536
CCDC13	-47.9524	16.5125	-6.24861	2.01196e-08	2.12812e-06	8.96236
SLC25A42	-706.909	332.6	-6.23956	2.09124e-08	2.20798e-06	8.92474
SMIM14	-7382.38	3527.46	-6.2337	2.14418e-08	2.25979e-06	8.9004
NRXN1	-272.71	35.85	-6.2261	2.21481e-08	2.33002e-06	8.86885
CES2	-32196	9879.64	-6.22054	2.26795e-08	2.38163e-06	8.84577
P2RY14	-617.571	127.588	-6.22007	2.27248e-08	2.38211e-06	8.84383
IGHV6-1	-221.814	37.8375	-6.21764	2.29619e-08	2.40265e-06	8.83372
SCTR	-70.0649	13.5625	-6.20086	2.46634e-08	2.57239e-06	8.76414
AKR1B10P1	-36.8831	5.5	-6.20036	2.47158e-08	2.57239e-06	8.76208
RP11-733O18.1	-16.0476	3.8875	-6.20036	2.47163e-08	2.57239e-06	8.76206
SLC9A1	-6519.73	2940.76	-6.17574	2.74468e-08	2.85148e-06	8.66008
RHOU	-3420.14	1630.11	-6.17252	2.78261e-08	2.88575e-06	8.64672
MT2A	-9542.94	2449.93	-6.16755	2.84203e-08	2.94215e-06	8.62616
MPEG1	-3507.25	1023.27	-6.1522	3.03365e-08	3.13497e-06	8.56266
RP11-452D12.1	-28.4805	5.5875	-6.15082	3.05145e-08	3.1478e-06	8.55697
HHIP	-734.446	187.762	-6.14412	3.13955e-08	3.23296e-06	8.52928
MGAM	-284.732	64.6125	-6.14295	3.15517e-08	3.24333e-06	8.52445
IGKV3D-7	-21.8139	3.3375	-6.1332	3.28862e-08	3.37456e-06	8.48414
LAMA1	-552.087	122.95	-6.12894	3.34857e-08	3.42659e-06	8.46657
FCRL4	-36.8831	7.5	-6.12877	3.35106e-08	3.42659e-06	8.46584
UNC5C	-426.299	144.688	-6.12232	3.44407e-08	3.51554e-06	8.43921
GSTA1	-286.701	60.05	-6.12029	3.47375e-08	3.53965e-06	8.43086
ITPKA	-1363.48	471.65	-6.11911	3.49132e-08	3.55135e-06	8.42595
CCL23	-65.8139	14.9875	-6.10668	3.68018e-08	3.73695e-06	8.3747
IGHV3-6	-13.2511	2.9125	-6.10408	3.72099e-08	3.77183e-06	8.36398
CABP2	-1.57576	0.15	-6.09516	3.86441e-08	3.91042e-06	8.32719
SIAE	-6876.12	3822.4	-6.09098	3.93347e-08	3.97342e-06	8.30996
SYNDIG1L	-16.8052	3.825	-6.08895	3.96745e-08	4.00082e-06	8.30159
PPARD	-5339.45	2650.45	-6.08465	4.04033e-08	4.06729e-06	8.28389
BTNL3	-3415.73	686.362	-6.08337	4.06224e-08	4.08231e-06	8.27862
P2RX1	-263.281	82.925	-6.08295	4.06958e-08	4.08266e-06	8.27687
NXPE4	-7891.41	1642.85	-6.07837	4.14923e-08	4.15542e-06	8.25802
TESK2	-578.489	331.538	-6.07594	4.19214e-08	4.19121e-06	8.24801
B4GALT1-AS1	-88.9827	43.6875	-6.06831	4.32972e-08	4.32135e-06	8.21661
MYOC	-420.654	37.7875	-6.06196	4.44751e-08	4.43135e-06	8.1905
IGKV1OR9-1	-3.38095	0.4125	-6.05619	4.55751e-08	4.53321e-06	8.16674
CYP4B1	-254.286	24.25	-6.05179	4.64309e-08	4.61047e-06	8.14865
RP11-476H24.1	-0.666667	0.025	-6.04818	4.71452e-08	4.66553e-06	8.1338
RP11-603B24.6	-0.666667	0.025	-6.04818	4.71452e-08	4.66553e-06	8.1338
AC005220.3	-5.64502	0.9	-6.0433	4.81267e-08	4.75461e-06	8.11377
RP11-135D11.2	-3.11255	0.3375	-6.04226	4.83387e-08	4.76749e-06	8.10949
KLB	-137.81	36.025	-6.02741	5.14674e-08	5.0675e-06	8.04851
TRPV3	-502.918	82.275	-6.02649	5.16678e-08	5.07867e-06	8.04473
LILRA4	-61.7273	10.5875	-6.02162	5.27424e-08	5.17558e-06	8.02472
SCN7A	-612.108	98.5125	-6.01682	5.38204e-08	5.27093e-06	8.00505
CTD-2269F5.1	-24.7403	8.1875	-6.0165	5.38946e-08	5.27093e-06	8.00371
CPT2	-2933.02	1603.64	-6.01455	5.43398e-08	5.30558e-06	7.99571
PTPRH	-6591.78	2141.41	-6.01324	5.46397e-08	5.32596e-06	7.99036
RP11-536C5.2	-8.05628	1.9125	-6.00401	5.6811e-08	5.52838e-06	7.95247
B3GNT7	-5058.79	920.913	-5.99971	5.78488e-08	5.62e-06	7.93487
GLTP	-2850.16	1824.39	-5.99807	5.82516e-08	5.64973e-06	7.92813
MARVELD3	-3137.87	1689.46	-5.99696	5.85231e-08	5.66665e-06	7.92361
DCAF12L1	-3.12554	0.325	-5.9965	5.86382e-08	5.66839e-06	7.9217
SLC32A1	-9.329	0.6875	-5.99229	5.9687e-08	5.76024e-06	7.90446
RP3-407E4.3	-7.92641	1.0375	-5.97743	6.35436e-08	6.12231e-06	7.8436
RBM47	-12027.1	7292.91	-5.96267	6.76172e-08	6.50406e-06	7.78321
SLCO2A1	-3917.87	1281.39	-5.95859	6.87888e-08	6.60587e-06	7.76651
ATP8B1	-16099.6	8705.44	-5.95515	6.97908e-08	6.69109e-06	7.75246
ARL14	-1693.41	497.762	-5.94955	7.14535e-08	6.83927e-06	7.72958
TM6SF2	-300.853	51.7625	-5.94648	7.23805e-08	6.91666e-06	7.71705
RP11-317J10.4	-1.28139	0.1	-5.9349	7.59911e-08	7.24983e-06	7.66975
UGT2B29P	-8.7619	0.9	-5.92986	7.7618e-08	7.39295e-06	7.64916
B3GALT5	-7701.81	1250.67	-5.92906	7.78791e-08	7.40575e-06	7.6459
COL6A5	-124.1	16.8875	-5.92475	7.93e-08	7.5286e-06	7.62833
SCUBE2	-1235.35	262.975	-5.9217	8.03247e-08	7.6135e-06	7.61586
TMEM56	-3666.15	1553.66	-5.91627	8.21747e-08	7.77623e-06	7.59373
IGHVII-60-1	-1.79221	0.275	-5.91503	8.26056e-08	7.80436e-06	7.58865
SDCBP2	-10591.7	2455.2	-5.9142	8.28936e-08	7.81891e-06	7.58527
IGLV2-14	-8676.84	1848.88	-5.91141	8.38667e-08	7.89794e-06	7.57393
AC012507.3	-7.02165	1.575	-5.90878	8.48005e-08	7.97303e-06	7.56317
NAT2	-649.965	238.075	-5.90809	8.50461e-08	7.98326e-06	7.56036
DSC2	-11938.1	5936.21	-5.89758	8.88776e-08	8.32953e-06	7.51755
STAB2	-115.091	36.225	-5.8934	9.04475e-08	8.46308e-06	7.50054
PPP2R3A	-1045.86	448.363	-5.88907	9.21039e-08	8.60427e-06	7.48291
AC066692.1	-0.948052	0.0875	-5.88246	9.46912e-08	8.83185e-06	7.456
RP11-1036E20.9	-11.2511	1.8375	-5.88111	9.52291e-08	8.86785e-06	7.4505
LPAR1	-1021.32	422.65	-5.87165	9.90777e-08	9.21155e-06	7.41201
IGHVIII-44	-0.640693	0.05	-5.86829	1.0048e-07	9.3001e-06	7.39837
RP11-232A1.2	-0.640693	0.05	-5.86829	1.0048e-07	9.3001e-06	7.39837
CLEC9A	-36.2381	8.7875	-5.86822	1.00508e-07	9.3001e-06	7.39809
CCL13	-780.883	113.4	-5.85733	1.05196e-07	9.71844e-06	7.35382
B4GALNT2	-11079.1	1034.69	-5.85017	1.08394e-07	9.99808e-06	7.32473
IGHV1OR15-2	-130.693	26.875	-5.84071	1.12764e-07	1.03848e-05	7.28635
IGKV1OR-3	-6.54978	1.3625	-5.83677	1.14638e-07	1.05407e-05	7.27035
LINC01135	-16.1212	6.15	-5.83489	1.15538e-07	1.06068e-05	7.26275
PTGER4	-2502.82	1052.04	-5.83038	1.17737e-07	1.07917e-05	7.24444
EYA2	-1137.67	194.325	-5.82968	1.18082e-07	1.08064e-05	7.2416
C5orf30	-2150.97	1334.36	-5.81868	1.23629e-07	1.12963e-05	7.19703
ZBTB7C	-3412.41	885.888	-5.81814	1.23911e-07	1.13043e-05	7.19482
F13A1	-2115.89	535.125	-5.81581	1.25117e-07	1.13966e-05	7.18541
AC006377.1	-0.333333	0.0125	-5.79949	1.3393e-07	1.15166e-05	7.11932
AC027612.2	-0.333333	0.0125	-5.79949	1.3393e-07	1.15166e-05	7.11932
AC079127.1	-0.333333	0.0125	-5.79949	1.3393e-07	1.15166e-05	7.11932
ACTR3BP3	-0.333333	0.0125	-5.79949	1.3393e-07	1.15166e-05	7.11932
ANKRD20A3	-0.333333	0.0125	-5.79949	1.3393e-07	1.15166e-05	7.11932
CH507-396I9.7	-0.333333	0.0125	-5.79949	1.3393e-07	1.15166e-05	7.11932
CLUHP2	-0.333333	0.0125	-5.79949	1.3393e-07	1.15166e-05	7.11932
CXorf51B	-0.333333	0.0125	-5.79949	1.3393e-07	1.15166e-05	7.11932
IGHVII-46-1	-0.333333	0.0125	-5.79949	1.3393e-07	1.15166e-05	7.11932
IGKV2-38	-0.333333	0.0125	-5.79949	1.3393e-07	1.15166e-05	7.11932
MIR1238	-0.333333	0.0125	-5.79949	1.3393e-07	1.15166e-05	7.11932
MIR320B1	-0.333333	0.0125	-5.79949	1.3393e-07	1.15166e-05	7.11932
MIR4739	-0.333333	0.0125	-5.79949	1.3393e-07	1.15166e-05	7.11932
OR4F16	-0.333333	0.0125	-5.79949	1.3393e-07	1.15166e-05	7.11932
OR8K5	-0.333333	0.0125	-5.79949	1.3393e-07	1.15166e-05	7.11932
PRY	-0.333333	0.0125	-5.79949	1.3393e-07	1.15166e-05	7.11932
RNA5SP76	-0.333333	0.0125	-5.79949	1.3393e-07	1.15166e-05	7.11932
RNU6-1331P	-0.333333	0.0125	-5.79949	1.3393e-07	1.15166e-05	7.11932
RNU6-441P	-0.333333	0.0125	-5.79949	1.3393e-07	1.15166e-05	7.11932
RNU6ATAC36P	-0.333333	0.0125	-5.79949	1.3393e-07	1.15166e-05	7.11932
RP1-37N7.6	-0.333333	0.0125	-5.79949	1.3393e-07	1.15166e-05	7.11932
RP1-93L7.4	-0.333333	0.0125	-5.79949	1.3393e-07	1.15166e-05	7.11932
RP11-1360M22.10	-0.333333	0.0125	-5.79949	1.3393e-07	1.15166e-05	7.11932
RP11-343J18.2	-0.333333	0.0125	-5.79949	1.3393e-07	1.15166e-05	7.11932
RP11-361A23.3	-0.333333	0.0125	-5.79949	1.3393e-07	1.15166e-05	7.11932
RP11-403N16.2	-0.333333	0.0125	-5.79949	1.3393e-07	1.15166e-05	7.11932
RP11-495K9.7	-0.333333	0.0125	-5.79949	1.3393e-07	1.15166e-05	7.11932
RP11-566F5.2	-0.333333	0.0125	-5.79949	1.3393e-07	1.15166e-05	7.11932
RP11-586K12.1	-0.333333	0.0125	-5.79949	1.3393e-07	1.15166e-05	7.11932
RP11-640I2.1	-0.333333	0.0125	-5.79949	1.3393e-07	1.15166e-05	7.11932
RP11-664I21.6	-0.333333	0.0125	-5.79949	1.3393e-07	1.15166e-05	7.11932
RP11-680G24.7	-0.333333	0.0125	-5.79949	1.3393e-07	1.15166e-05	7.11932
RP11-94C24.11	-0.333333	0.0125	-5.79949	1.3393e-07	1.15166e-05	7.11932
RP13-577H12.3	-0.333333	0.0125	-5.79949	1.3393e-07	1.15166e-05	7.11932
RP4-539M6.19	-0.333333	0.0125	-5.79949	1.3393e-07	1.15166e-05	7.11932
RP5-965K10.3	-0.333333	0.0125	-5.79949	1.3393e-07	1.15166e-05	7.11932
SNX3P1Y	-0.333333	0.0125	-5.79949	1.3393e-07	1.15166e-05	7.11932
TRDD1	-0.333333	0.0125	-5.79949	1.3393e-07	1.15166e-05	7.11932
CTD-2026C7.1	-31.8442	5.35	-5.79359	1.37266e-07	1.17861e-05	7.09544
AOC1	-25155.4	9924.64	-5.78694	1.41123e-07	1.20995e-05	7.06854
SELENBP1	-59442.8	14504.3	-5.78002	1.45252e-07	1.24352e-05	7.04055
KRT25	-2.74026	0.3625	-5.77604	1.47675e-07	1.26242e-05	7.02449
PXMP2	-1201.41	655.312	-5.77388	1.49007e-07	1.27194e-05	7.01577
RPL15P21	-20.2554	4.8375	-5.77191	1.50234e-07	1.28054e-05	7.00781
IGKV2D-24	-71.4589	13.8875	-5.76856	1.52343e-07	1.29662e-05	6.99429
HRASLS2	-395.693	59.8125	-5.76768	1.52906e-07	1.29952e-05	6.9907
INSL5	-77.4199	6.15	-5.76587	1.54058e-07	1.30741e-05	6.98342
RIOK3	-7585.16	3667.29	-5.76189	1.5663e-07	1.32731e-05	6.96735
PGM1	-5541.53	2905.61	-5.75816	1.59081e-07	1.34613e-05	6.95228
IGKV1D-12	-73.8788	12.225	-5.75547	1.60867e-07	1.35927e-05	6.94144
RP11-232L2.2	-6.92641	1	-5.75444	1.61561e-07	1.3617e-05	6.93727
IGLJCOR18	-3.03463	0.4125	-5.75435	1.61621e-07	1.3617e-05	6.9369
IGHV1-18	-5119.35	1117.62	-5.74936	1.65011e-07	1.38826e-05	6.91676
IGHJ2P	-5.12121	0.7375	-5.74206	1.70092e-07	1.42894e-05	6.88733
C10orf54	-3793.64	1645.62	-5.73396	1.75909e-07	1.47569e-05	6.8547
TTC22	-2854.61	1381.44	-5.73126	1.77895e-07	1.49021e-05	6.84381
LL22NC03-23C6.15	-1.64069	0.0875	-5.70559	1.97878e-07	1.65523e-05	6.74052
MGLL	-16267.8	7945.95	-5.69399	2.0762e-07	1.73423e-05	6.6939
CNR1	-210.009	40.2	-5.69245	2.08951e-07	1.74286e-05	6.6877
IGLV2-8	-2160.06	493.613	-5.6874	2.13368e-07	1.77716e-05	6.66741
BCAS1	-8351.82	2098.04	-5.68441	2.16023e-07	1.79672e-05	6.65541
PTPN21	-1344.94	788.825	-5.67691	2.22828e-07	1.85068e-05	6.62533
AQPEP	-49.7403	10.125	-5.66641	2.32718e-07	1.93007e-05	6.58321
RP11-290F5.1	-168.623	54.7	-5.6646	2.34471e-07	1.94185e-05	6.57593
IQGAP2	-5417.31	2184.84	-5.65858	2.40378e-07	1.98796e-05	6.5518
CBLN2	-57.6753	16.4875	-5.65022	2.48818e-07	2.05484e-05	6.51834
RP11-1166P10.8	-74.2554	15.8625	-5.6457	2.53508e-07	2.09062e-05	6.50023
C16orf89	-298.165	56.35	-5.63921	2.60391e-07	2.14435e-05	6.47426
HMGN2P47	-3.33766	0.7875	-5.63558	2.64326e-07	2.17369e-05	6.45971
MOB3B	-2501.15	1405.31	-5.6331	2.67034e-07	2.19287e-05	6.44983
IGLV5-45	-829.844	142.275	-5.62667	2.74217e-07	2.24869e-05	6.4241
SLC4A9	-34.8312	9.475	-5.62629	2.74651e-07	2.24909e-05	6.42256
TMPRSS2	-19745.8	9441.96	-5.62212	2.7941e-07	2.28486e-05	6.40591
CGN	-10811.6	6202.16	-5.61799	2.84208e-07	2.32085e-05	6.3894
HIGD1AP1	-6.05628	1.8375	-5.61455	2.88267e-07	2.35071e-05	6.37565
AMN	-4728.03	1757.28	-5.60634	2.98175e-07	2.42811e-05	6.34289
ENDOD1	-4179.18	2388.54	-5.60564	2.99039e-07	2.43175e-05	6.34009
AP3S2	-1601.97	1080.1	-5.59918	3.07099e-07	2.49382e-05	6.31431
RP11-90P13.1	-12.9913	3.1625	-5.59798	3.08617e-07	2.50267e-05	6.30953
RP11-483I13.6	-20.1385	6.95	-5.59521	3.12161e-07	2.5279e-05	6.29846
XKR4	-84.5584	14.6125	-5.59136	3.17147e-07	2.56471e-05	6.2831
HRCT1	-833.143	250.1	-5.5898	3.19189e-07	2.57766e-05	6.27688
AC009014.3	-437.511	115.562	-5.58402	3.26868e-07	2.63603e-05	6.25384
HMGCLL1	-21.2641	6.2	-5.57314	3.4181e-07	2.75273e-05	6.21052
XXbac-BPG13B8.10	-19.1558	2.5625	-5.57187	3.43596e-07	2.7633e-05	6.20547
WISP2	-545.364	72.0875	-5.56905	3.47607e-07	2.79171e-05	6.19422
RP11-532F6.3	-101.961	34.8625	-5.56329	3.55931e-07	2.85463e-05	6.1713
TSC22D3	-6609.48	2714.38	-5.56243	3.57179e-07	2.86071e-05	6.1679
RP11-245G13.2	-17.8355	3.5	-5.55867	3.62743e-07	2.9013e-05	6.15292
STYK1	-1085.6	503.113	-5.55641	3.66114e-07	2.92425e-05	6.14396
PMP2	-29.5022	4.9375	-5.55385	3.69991e-07	2.95118e-05	6.13376
CLMN	-4757.55	2627.86	-5.55009	3.75744e-07	2.99298e-05	6.11881
CITED2	-2025.81	1212.49	-5.54954	3.76588e-07	2.99562e-05	6.11663
AC246787.4	-28.1212	5.6	-5.54833	3.78468e-07	3.00648e-05	6.11181
PEX11A	-1108.47	609.1	-5.54372	3.85683e-07	3.05963e-05	6.09351
EFHC2	-72.0563	18.3125	-5.5407	3.90488e-07	3.09355e-05	6.08151
GREM2	-1348.05	254.838	-5.53433	4.00826e-07	3.17114e-05	6.0562
RP11-567M21.3	-1.51082	0.2125	-5.52973	4.08439e-07	3.227e-05	6.03797
KCTD9	-1669.67	1151.28	-5.52387	4.18374e-07	3.30102e-05	6.01469
UGT1A9	-15.29	2.95	-5.51336	4.3677e-07	3.44152e-05	5.97301
RP11-39H3.2	-8.79221	2.5375	-5.50475	4.52427e-07	3.56009e-05	5.93889
RP11-430C7.4	-8.56277	2.425	-5.49037	4.79813e-07	3.7705e-05	5.88198
NKX2-3	-532.892	161.425	-5.48361	4.93247e-07	3.87086e-05	5.85524
KCNS2	-52.7922	7.1875	-5.47028	5.20828e-07	4.08182e-05	5.80255
PDZK1	-242.342	66.4125	-5.46991	5.21607e-07	4.08245e-05	5.80111
RP11-459C13.1	-11.0909	2.325	-5.4671	5.27614e-07	4.12394e-05	5.79002
TST	-11950.8	6234.38	-5.46341	5.35621e-07	4.18092e-05	5.77544
TMEM132D	-25.0173	5.5875	-5.45778	5.48047e-07	4.27221e-05	5.75323
B3GNT8	-1997.22	1029.01	-5.45715	5.49454e-07	4.27746e-05	5.75075
IGHV1OR16-4	-2.93074	0.5125	-5.45465	5.55083e-07	4.31553e-05	5.74088
SLC16A12	-24.0087	5.225	-5.45114	5.63095e-07	4.372e-05	5.72701
ADH7	-10.9827	0.7625	-5.4495	5.66874e-07	4.39549e-05	5.72054
MIR4537	-6.65368	1.2625	-5.4439	5.79951e-07	4.49093e-05	5.69846
SVOPL	-167.857	25.4375	-5.44173	5.85082e-07	4.52466e-05	5.68993
AC092421.1	-1.28139	0.1	-5.44104	5.86728e-07	4.53139e-05	5.68721
LOR	-2.02165	0.3875	-5.43628	5.98221e-07	4.61246e-05	5.66843
RP11-268P4.4	-6.33766	1.9	-5.43604	5.98805e-07	4.61246e-05	5.66749
SCN11A	-65.7143	14.75	-5.4271	6.20979e-07	4.77696e-05	5.6323
THRB	-1506.28	441.875	-5.42551	6.2499e-07	4.80149e-05	5.62606
AP000295.10	-12.8658	5.95	-5.42429	6.28112e-07	4.81913e-05	5.62124
OTUD7A	-226.147	93	-5.42323	6.30815e-07	4.83351e-05	5.61709
MAS1LP1	-1.79221	0.275	-5.41611	6.49349e-07	4.96901e-05	5.58906
IGHV3-16	-9.58442	1.775	-5.41308	6.57384e-07	5.02391e-05	5.57716
PER1	-3383.16	1441.04	-5.40899	6.68408e-07	5.10148e-05	5.56107
PCK1	-9739.92	2607.32	-5.40049	6.9187e-07	5.27365e-05	5.52768
RP11-812E19.10	-1.54978	0.175	-5.38945	7.23574e-07	5.50812e-05	5.48433
CPT1A	-12298.7	6595.16	-5.37691	7.61308e-07	5.78783e-05	5.43515
RP11-452I5.2	-168.065	70.2375	-5.375	7.67232e-07	5.82528e-05	5.42765
MAOA	-16929.6	5642.3	-5.37359	7.71614e-07	5.85094e-05	5.42214
SIGLEC11	-43.8139	11.1625	-5.36614	7.95261e-07	6.02242e-05	5.39294
IGHV3OR16-16	-11.5411	2.225	-5.35174	8.42971e-07	6.37546e-05	5.33659
SLC25A23	-5995.74	3370.1	-5.34778	8.56576e-07	6.46997e-05	5.3211
LINC00675	-1583.12	830.25	-5.34611	8.62384e-07	6.50542e-05	5.31457
PCNAP4	-2.49784	0.2625	-5.33541	9.0046e-07	6.78389e-05	5.27279
RP11-350G8.5	-10.8961	3.5125	-5.32885	9.24656e-07	6.9572e-05	5.24714
MPZ	-180.502	55.6	-5.32831	9.26666e-07	6.96335e-05	5.24504
IGLJ1	-10.4892	2.2375	-5.32608	9.3506e-07	7.0174e-05	5.23633
LGALS9C	-1090.96	222.95	-5.32259	9.48296e-07	7.1076e-05	5.22273
RP11-249C24.12	-5.05195	1.1375	-5.32004	9.58118e-07	7.172e-05	5.21277
XXyac-YM21GA2.4	-11.1861	1.9	-5.3136	9.83327e-07	7.35128e-05	5.18766
KBTBD11-OT1	-47.2727	21.5	-5.30426	1.02106e-06	7.62362e-05	5.15126
IGHV3OR15-7	-87.3939	15.55	-5.2844	1.10605e-06	8.24765e-05	5.07397
IGHV3-52	-65.0476	13.725	-5.28285	1.11296e-06	8.28855e-05	5.06795
SPHKAP	-9.13853	1.5375	-5.27391	1.15372e-06	8.58119e-05	5.03319
LIMA1	-13685.8	7399.09	-5.26519	1.19487e-06	8.87596e-05	4.99932
IGKV1OR2-9	-13.8225	2.3625	-5.264	1.20056e-06	8.90518e-05	4.99473
PCOLCE2	-311.753	58.9375	-5.26374	1.20186e-06	8.90518e-05	4.99369
RP11-284H19.1	-2.35498	0.4	-5.26301	1.20536e-06	8.91566e-05	4.99087
LPCAT3	-1630.81	955.013	-5.26281	1.20632e-06	8.91566e-05	4.9901
IGKV1D-37	-6.671	0.9125	-5.25768	1.23143e-06	9.08968e-05	4.9702
PRDX6	-14636.8	9100.08	-5.25505	1.24451e-06	9.17465e-05	4.95999
ANGPTL5	-8.7619	1.9	-5.25049	1.26749e-06	9.3323e-05	4.94231
NUPR1L	-10.5628	1.5	-5.2479	1.28076e-06	9.41809e-05	4.93225
IRF4	-764.667	215.675	-5.24127	1.31525e-06	9.65957e-05	4.90657
IGLV6-57	-2897.04	609.6	-5.24018	1.32102e-06	9.68972e-05	4.90235
IGKV1-39	-145.831	27.6375	-5.2397	1.32354e-06	9.69608e-05	4.9005
PAQR8	-8063.09	3784.61	-5.23809	1.33211e-06	9.74661e-05	4.89427
C1orf210	-1907.32	1100.88	-5.23516	1.34787e-06	9.84152e-05	4.8829
SLC9A2	-3709.27	1134.83	-5.23505	1.34845e-06	9.84152e-05	4.88249
IGKV1-16	-2034.29	437	-5.22667	1.39448e-06	0.000101595	4.85006
RP11-115J16.2	-10.6147	1.45	-5.22649	1.3955e-06	0.000101595	4.84936
RP5-965F6.2	-6.19481	2.0375	-5.22205	1.42051e-06	0.000103287	4.8322
FAM47DP	-3.09524	0.6875	-5.21629	1.45366e-06	0.000105566	4.80992
KAT2B	-837.303	570.763	-5.21456	1.46374e-06	0.000106165	4.80325
TRANK1	-5543.2	1803	-5.21121	1.48352e-06	0.000107467	4.79028
AC034236.2	-1.60173	0.125	-5.20347	1.53015e-06	0.000110708	4.76039
DHRS9	-9357.78	1130.8	-5.1995	1.55463e-06	0.00011234	4.74506
FBLIM1	-5883.32	3977.64	-5.19757	1.56662e-06	0.000113066	4.73764
CNGA3	-52.6623	13.3125	-5.19583	1.5776e-06	0.000113718	4.7309
CLEC4M	-9	1.3375	-5.18917	1.62012e-06	0.000116639	4.70522
IGLV3-15	-2.30303	0.45	-5.18726	1.63253e-06	0.000117388	4.69785
AC099539.1	-2.55844	0.5375	-5.18399	1.65395e-06	0.000118781	4.68526
MESP1	-160.645	64.7125	-5.18069	1.67589e-06	0.000120209	4.67254
IGLV1-36	-306.905	58.9375	-5.17788	1.6948e-06	0.000121416	4.66171
BARX2	-960.459	245.225	-5.17439	1.71851e-06	0.000122892	4.64829
RILP	-786.433	424.725	-5.17423	1.71961e-06	0.000122892	4.64767
TGFBR3L	-29.8658	7.5875	-5.17299	1.72817e-06	0.000123353	4.64288
FAM150B	-80.0173	25.65	-5.16072	1.81475e-06	0.000129374	4.59569
AC093642.4	-1.72727	0.3375	-5.15801	1.83446e-06	0.00013062	4.58526
RP11-720L2.4	-1.57576	0.15	-5.15674	1.84374e-06	0.000131121	4.58039
RP11-51F16.9	-24.5108	14.075	-5.15621	1.84766e-06	0.00013124	4.57834
AL117187.1	-3.04329	0.7375	-5.15403	1.86373e-06	0.000132221	4.56998
RP11-307N16.7	-11.5281	2.2375	-5.14553	1.92788e-06	0.000136606	4.53732
GGTA1P	-300.641	103.3	-5.14021	1.96911e-06	0.000139358	4.5169
RP1-278O22.1	-161.043	46.6625	-5.13938	1.97564e-06	0.000139651	4.5137
RELL1	-447.615	167.838	-5.12974	2.0528e-06	0.000144929	4.47673
CTD-2001J20.1	-11.4156	2.0125	-5.12711	2.0743e-06	0.000146271	4.46667
MMRN1	-770.03	162.512	-5.12199	2.11691e-06	0.000149095	4.44706
STMN4	-42.6017	6.6625	-5.12084	2.12664e-06	0.0001496	4.44263
PPARGC1A	-1788.89	711.525	-5.11774	2.15294e-06	0.00015115	4.43077
ZNF725P	-1.77922	0.2875	-5.11764	2.15384e-06	0.00015115	4.43037
CYP2C8	-41.8355	11.4	-5.11678	2.16116e-06	0.000151481	4.42709
ARRDC4	-2894.04	1473.49	-5.11617	2.16645e-06	0.000151588	4.42474
C7orf31	-585.628	293	-5.116	2.16788e-06	0.000151588	4.4241
BCL2L11	-1798.24	1205.53	-5.09326	2.37239e-06	0.000165585	4.33713
LINC01133	-1649.98	638.225	-5.09312	2.37372e-06	0.000165585	4.33659
RP11-467I17.1	-2.41991	0.3375	-5.09214	2.38289e-06	0.000166026	4.33287
HPGD	-9148.97	2150.11	-5.08815	2.42084e-06	0.000168469	4.31763
AL157823.1	-0.65368	0.0375	-5.08651	2.43669e-06	0.000169169	4.31134
AL356135.1	-0.65368	0.0375	-5.08651	2.43669e-06	0.000169169	4.31134
RP11-342A1.1	-2.62338	0.475	-5.08568	2.44471e-06	0.000169524	4.30817
DISP2	-1294.68	274.2	-5.08387	2.46226e-06	0.000170539	4.30127
ACSF2	-3410.32	1601.56	-5.08293	2.47143e-06	0.00017094	4.29768
RP1-161P9.5	-8.36797	1.6125	-5.0824	2.47665e-06	0.00017094	4.29565
ADCY9	-2021.5	1203.97	-5.08238	2.47684e-06	0.00017094	4.29557
IGLV2-11	-3497.05	831.087	-5.07641	2.53599e-06	0.000174816	4.27281
IGHV3-32	-1.71429	0.35	-5.07522	2.54795e-06	0.000175433	4.26828
CLDN7	-19451.3	13513.5	-5.07405	2.55981e-06	0.000176042	4.2638
PTGDR	-437.736	95.0125	-5.07235	2.57703e-06	0.000177018	4.25733
PIRT	-165.732	28.15	-5.06433	2.66001e-06	0.000182503	4.22677
TMEM255A	-156.714	48.1625	-5.05981	2.70794e-06	0.000185573	4.20955
SLC22A23	-3611.81	1799.3	-5.0548	2.76201e-06	0.000189057	4.19049
BTBD3	-2820.84	1823.61	-5.04841	2.83254e-06	0.000193658	4.16618
BMP5	-491.277	136.812	-5.04266	2.89755e-06	0.000197836	4.1443
IGHV3-60	-51.0649	11.85	-5.04241	2.90043e-06	0.000197836	4.14334
PCAT18	-11.8918	1.8875	-5.04182	2.90714e-06	0.000198062	4.14112
GPA33	-28351.5	10429.7	-5.04102	2.91636e-06	0.000198459	4.13806
IGHV1-14	-37.658	7.0875	-5.03606	2.97391e-06	0.000202139	4.11923
RP11-5O23.1	-1.93074	0.475	-5.03333	3.00608e-06	0.000204088	4.10885
NEU4	-1891.84	429.775	-5.0255	3.1002e-06	0.000210181	4.07914
RP11-268P4.5	-0.922078	0.1125	-5.02498	3.10661e-06	0.000210181	4.07715
RP11-507J18.1	-0.922078	0.1125	-5.02498	3.10661e-06	0.000210181	4.07715
FMO5	-2708.55	996.025	-5.0244	3.11372e-06	0.000210418	4.07494
GDNF	-133.701	50.3125	-5.01631	3.21444e-06	0.000216973	4.04426
CPEB3	-440.026	269.475	-5.01551	3.22454e-06	0.000217403	4.04124
SLC23A3	-258.805	99.9	-5.00701	3.33409e-06	0.00022453	4.00904
IGHV3OR16-7	-7.13853	1.4625	-5.00007	3.42635e-06	0.000230477	3.98274
RP11-20J15.5	-3.35065	0.775	-4.99793	3.45524e-06	0.000232153	3.97465
PROB1	-385.208	216.238	-4.994	3.50891e-06	0.000235307	3.9598
IGKV1-12	-102.273	31.5625	-4.99382	3.51148e-06	0.000235307	3.9591
RP11-285G1.9	-14.2424	2.625	-4.99362	3.51427e-06	0.000235307	3.95833
IGHV4-59	-3788.79	983.288	-4.98436	3.64432e-06	0.000243736	3.92332
CTD-2195M15.1	-1.45887	0.2625	-4.97742	3.74488e-06	0.000250174	3.8971
RP11-284N8.3	-180.753	58.025	-4.97649	3.75843e-06	0.000250793	3.89362
RP11-321G12.1	-331.913	69.2	-4.97441	3.78932e-06	0.000252565	3.88574
IGKV1OR1-1	-7.36797	1.575	-4.97002	3.85495e-06	0.000256647	3.86919
IGHV1OR15-1	-15.026	1.5375	-4.96581	3.91917e-06	0.000260625	3.85328
OPN4	-8.65801	2	-4.9645	3.93921e-06	0.000261659	3.84837
IGLV1-40	-4897.98	1384.03	-4.96063	3.99943e-06	0.000265357	3.83376
IGLV7-43	-1153.87	164.738	-4.95688	4.05849e-06	0.000268971	3.81964
LINC01507	-1.22944	0.15	-4.95552	4.08023e-06	0.000270105	3.8145
IGHV1OR16-1	-15.9264	3.3375	-4.95517	4.08583e-06	0.000270169	3.81318
CCDC68	-1853.46	652.712	-4.95424	4.10063e-06	0.000270392	3.80969
AC139099.6	-0.627706	0.0625	-4.9538	4.10773e-06	0.000270392	3.80803
RNU6-1248P	-0.627706	0.0625	-4.9538	4.10773e-06	0.000270392	3.80803
RP11-567C20.2	-0.627706	0.0625	-4.9538	4.10773e-06	0.000270392	3.80803
RCAN2	-1109.6	408.675	-4.94853	4.19325e-06	0.000275711	3.78818
AGFG2	-3382.61	1970.9	-4.94743	4.21137e-06	0.000276591	3.78403
OR7E94P	-2.8658	0.575	-4.94556	4.24225e-06	0.000278306	3.777
STAB1	-4711.93	1812.44	-4.9444	4.26144e-06	0.000279251	3.77265
ZP1	-12.368	3.7625	-4.94395	4.269e-06	0.000279433	3.77095
CELA3A	-14.1645	2.7	-4.94158	4.3087e-06	0.000281715	3.76203
IGKV1OR2-11	-19.8745	3.5375	-4.93862	4.35885e-06	0.000284676	3.75089
RP11-238K6.1	-4.82684	0.6875	-4.9383	4.36427e-06	0.000284712	3.74969
FLT3	-74.8961	22.9125	-4.93794	4.37045e-06	0.000284796	3.74833
AC096579.13	-11.9654	4.15	-4.93536	4.41469e-06	0.000287358	3.73863
IGKV2OR22-4	-141.965	22.025	-4.93394	4.43926e-06	0.000288636	3.73329
IGHV4-34	-1974.91	508.812	-4.91292	4.81856e-06	0.000312949	3.65436
IGKV1D-17	-205.762	38.2875	-4.91098	4.85506e-06	0.000314969	3.6471
GRIK3	-200.351	48.1625	-4.90759	4.91966e-06	0.000318806	3.63438
IGHV3-41	-61.5498	13.425	-4.9063	4.94438e-06	0.000320053	3.62956
AC103563.3	-2.90476	0.5375	-4.89529	5.16102e-06	0.000333706	3.58829
RP1-269M15.3	-1.84416	0.225	-4.88581	5.35471e-06	0.000345847	3.55284
PLSCR4	-1206.32	788.25	-4.88353	5.40255e-06	0.000348551	3.54428
SQRDL	-6166.96	3948.3	-4.87729	5.53506e-06	0.000356706	3.52097
IGHV4-28	-570.71	127.025	-4.87625	5.55741e-06	0.000357752	3.51709
ASB11	-8	1.3	-4.87003	5.69324e-06	0.000366092	3.49386
NAT1	-862.333	430.337	-4.86837	5.73014e-06	0.000368059	3.48764
TMEM131	-4354.03	3930.91	-4.86425	5.82231e-06	0.000373568	3.47229
MCHR2	-3.02165	0.425	-4.86357	5.83775e-06	0.000374148	3.46974
MXD1	-7484.94	3114.07	-4.86164	5.88162e-06	0.000376546	3.46254
WI2-2118C23.2	-5.66667	1.2125	-4.8491	6.17442e-06	0.000394859	3.41582
IGHV2OR16-5	-4.84848	1	-4.84723	6.21944e-06	0.000397302	3.40883
IGKV3-20	-10429.1	3291.69	-4.84182	6.35097e-06	0.000405261	3.3887
MYO1A	-9261.26	3676.04	-4.84123	6.36569e-06	0.000405696	3.38648
CLEC10A	-469.455	120.15	-4.84098	6.37169e-06	0.000405696	3.38557
RP11-310P5.2	-46.316	6.0875	-4.82872	6.68125e-06	0.000424943	3.33996
CTSG	-214.42	40.2875	-4.82163	6.86686e-06	0.000436274	3.31361
PLS1	-15465.7	9702.29	-4.8199	6.91269e-06	0.000438708	3.30722
RP11-867O8.5	-7.92641	2.0375	-4.81156	7.13904e-06	0.000452518	3.27624
IGHV3OR16-9	-58.039	14.1375	-4.81131	7.1458e-06	0.000452518	3.27533
DIRAS2	-22	5.825	-4.80773	7.24531e-06	0.000458323	3.26204
AC006076.1	-1.24242	0.1375	-4.8058	7.2995e-06	0.000461251	3.25488
NBPF1	-1034.55	688.575	-4.80543	7.30999e-06	0.000461414	3.2535
ENTPD8	-3790.9	865.263	-4.80109	7.43319e-06	0.000468684	3.23743
RP11-468E2.6	-3.88312	1.2625	-4.79892	7.49573e-06	0.000472118	3.22938
SYNPO	-5772.99	3232.16	-4.79364	7.64964e-06	0.000481293	3.20985
IGHJ1P	-1.80519	0.2625	-4.78645	7.8644e-06	0.000494272	3.18324
HEATR5A	-1324.98	1076.38	-4.78572	7.88668e-06	0.000495139	3.18052
ADAMTS1	-3603.29	1311.84	-4.78462	7.92025e-06	0.000496713	3.17644
CD1D	-223.948	96.45	-4.7827	7.97888e-06	0.000499732	3.16935
CAPN2	-15079.9	10704.2	-4.78248	7.98551e-06	0.000499732	3.16856
CLCN2	-3143.12	1732.75	-4.78161	8.0124e-06	0.000500878	3.16533
LINC00955	-46.8528	8.2375	-4.78081	8.03716e-06	0.000501889	3.16236
NHSL1	-3250.33	2326.22	-4.77889	8.09663e-06	0.000505062	3.15528
KBTBD11	-2420.69	1452.09	-4.76774	8.45133e-06	0.000526625	3.11408
NEURL1B	-5805.24	3017.79	-4.7664	8.49482e-06	0.000528771	3.10915
TSPAN1	-56988.8	15489.6	-4.76588	8.51188e-06	0.000529268	3.10723
CTSS	-13381.9	10597.6	-4.75469	8.88563e-06	0.000551921	3.06595
IGHVIII-76-1	-1.19048	0.1875	-4.75431	8.89856e-06	0.000552136	3.06455
VIPR1	-3569.29	1754.89	-4.75372	8.91889e-06	0.00055281	3.06236
IGKV2OR2-1	-24.0823	3.4875	-4.74588	9.19101e-06	0.000569073	3.03349
RP11-400G3.5	-6.09091	1.1375	-4.74555	9.20251e-06	0.000569181	3.03229
CCDC152	-247.433	74.5125	-4.74485	9.2273e-06	0.00057011	3.02971
LDHAL6EP	-3.09957	0.35	-4.74334	9.28079e-06	0.000572809	3.02416
IGKV2D-30	-50.2424	8.975	-4.74151	9.34643e-06	0.000576251	3.01739
UGT1A5	-11.6667	1.4375	-4.73809	9.46953e-06	0.000583225	3.00482
IGHV1-2	-3574.74	684.65	-4.7335	9.63755e-06	0.000592948	2.98794
VDR	-6941.02	4676.6	-4.73251	9.67414e-06	0.000594573	2.9843
KCNA5	-55.2554	21.15	-4.73205	9.6911e-06	0.000594989	2.98262
LINC00940	-45.0173	11.3375	-4.73146	9.713e-06	0.000595707	2.98045
SIGLEC6	-40.4372	13.4125	-4.72627	9.90787e-06	0.000607021	2.96138
ARC	-115.584	26.75	-4.72303	1.00315e-05	0.000613952	2.94947
RP11-779O18.1	-1.95671	0.45	-4.72179	1.0079e-05	0.000616215	2.94493
VSTM2A-OT1	-4.9697	0.55	-4.72068	1.0122e-05	0.000618191	2.94085
LINC00996	-61.329	28.6375	-4.71603	1.03037e-05	0.000628634	2.92377
MT1XP1	-6.96104	3.3	-4.71413	1.03786e-05	0.00063254	2.91682
AGPAT9	-1298.61	389.425	-4.70492	1.07503e-05	0.000653942	2.88303
IGSF10	-229.268	66.6625	-4.70488	1.07521e-05	0.000653942	2.88287
OR2AT1P	-0.909091	0.125	-4.70406	1.07859e-05	0.000655315	2.87986
KB-1517D11.4	-16.9394	2.3625	-4.6974	1.10632e-05	0.000671462	2.8555
PIGCP1	-108.978	70.775	-4.6903	1.1367e-05	0.000689183	2.8295
CHODL	-65.6926	22.4375	-4.68999	1.13803e-05	0.000689274	2.82838
CTA-150C2.13	-19.4113	3.65	-4.68793	1.14701e-05	0.000693743	2.82084
FXYD3	-49876.8	22344.6	-4.68776	1.14778e-05	0.000693743	2.82019
DNM1P17	-1.39394	0.325	-4.68437	1.16268e-05	0.000702018	2.80782
SFTA1P	-35.4416	7.8875	-4.67944	1.18474e-05	0.000714599	2.78979
C9orf135-AS1	-1.25541	0.125	-4.67846	1.18916e-05	0.000716527	2.78621
DPT	-1906.31	415.175	-4.6771	1.19532e-05	0.000719498	2.78125
LINC00582	-18.4156	5.275	-4.66396	1.25661e-05	0.000755609	2.73328
AKR1C2	-451.628	172.975	-4.66328	1.25986e-05	0.000756783	2.73081
CPM	-3223.44	907.438	-4.66207	1.26568e-05	0.0007595	2.72638
IGHV3-76	-22.8571	5	-4.66162	1.26782e-05	0.00076	2.72477
AC074363.1	-9.99134	2.05	-4.65929	1.27911e-05	0.000765249	2.71626
P2RY12	-51.1861	14.4	-4.65927	1.27919e-05	0.000765249	2.7162
MATN2	-4458.06	2035.79	-4.65383	1.3059e-05	0.000780424	2.69638
COL23A1	-94.7359	41.15	-4.65293	1.3104e-05	0.000782125	2.69308
ZFYVE28	-802.602	515.163	-4.65272	1.31142e-05	0.000782125	2.69233
OAF	-4620.11	3381.47	-4.65133	1.31834e-05	0.000785448	2.68728
EPAS1	-9345.05	6689.39	-4.64884	1.3309e-05	0.000792126	2.67819
FRMD1	-1537.95	552.388	-4.64783	1.33599e-05	0.000794344	2.67453
IGHV3OR16-10	-22.4675	5.375	-4.63982	1.3772e-05	0.000818011	2.6454
DHDDS	-1912.48	1627.9	-4.6391	1.38097e-05	0.000819417	2.64278
RPS17P1	-3.82684	0.65	-4.63686	1.39275e-05	0.000825571	2.63463
LANCL3	-278.55	123.562	-4.63574	1.39867e-05	0.000828238	2.63056
TEF	-1616.49	865.125	-4.63504	1.40239e-05	0.0008296	2.62801
SLC46A1	-701.437	338.2	-4.63422	1.40676e-05	0.000831342	2.62503
RP11-848P1.9	-76.0909	50.7625	-4.63258	1.41554e-05	0.000835685	2.61907
RP11-527L4.2	-1.99567	0.4125	-4.63198	1.41875e-05	0.000836734	2.61689
ATP1B3	-8880.14	7851.86	-4.62944	1.43247e-05	0.000843972	2.60767
EDIL3	-2309.83	1233.12	-4.62769	1.44201e-05	0.000848736	2.6013
HRK	-53.0173	7.6375	-4.62534	1.45491e-05	0.000855464	2.59277
VWA3B	-70.7662	26.8875	-4.61645	1.50467e-05	0.000883832	2.56053
RP11-434H14.1	-13.7143	1.8	-4.61584	1.50816e-05	0.000884997	2.5583
CCNJL	-1122.9	466.212	-4.61061	1.53828e-05	0.000901761	2.53935
KRT24	-85.645	7.9	-4.60489	1.57188e-05	0.000920535	2.51864
NDRG2	-5112.68	2972.05	-4.60383	1.5782e-05	0.000923308	2.5148
AKR1C3	-4989.69	2767.09	-4.60342	1.58065e-05	0.000923816	2.51331
RP11-100L22.1	-4.06494	1.0875	-4.59729	1.61762e-05	0.000944482	2.49115
EPHA10	-1375.25	727.325	-4.59642	1.62294e-05	0.000946642	2.488
LINC00092	-22.2641	8.2375	-4.59433	1.6358e-05	0.00095319	2.48044
TNFSF10	-4280.68	3166.51	-4.58981	1.66394e-05	0.000968621	2.4641
SNX24	-396.71	274.5	-4.58309	1.70665e-05	0.000992493	2.43982
KLHL34	-102.667	25.85	-4.58207	1.71324e-05	0.000995335	2.43612
IGHV4OR15-8	-11.1126	2.6375	-4.58168	1.71578e-05	0.000995816	2.43471
PAFAH2	-1666.7	1354.8	-4.5809	1.7208e-05	0.000997742	2.4319
CREB3L3	-499.965	84.45	-4.57948	1.73003e-05	0.0010021	2.42678
IGKV1D-35	-4.72294	0.7875	-4.5739	1.76677e-05	0.00102146	2.40665
GNG12	-7628.76	6764.99	-4.57387	1.76696e-05	0.00102146	2.40655
LINC00483	-1228.63	548.775	-4.56809	1.80581e-05	0.00104289	2.38571
FLJ38122	-9.46753	2.8875	-4.5678	1.80783e-05	0.00104297	2.38464
FCRL2	-138.342	40.5125	-4.56755	1.80952e-05	0.00104297	2.38375
GABRG1	-4.83983	0.675	-4.56619	1.81882e-05	0.00104729	2.37884
ANKRD33B	-198.13	78.3	-4.56526	1.82516e-05	0.00104963	2.37551
SUCLG2	-8171.6	5950.5	-4.56507	1.82647e-05	0.00104963	2.37482
RP11-685G9.2	-7.41558	1.8625	-4.56429	1.83186e-05	0.00105169	2.372
MGAT4A	-4583.1	3093.76	-4.56318	1.83949e-05	0.00105503	2.36802
IGHV3-21	-2267.32	673.7	-4.56048	1.85826e-05	0.00106475	2.35829
LARGE	-1395.28	1074.38	-4.55885	1.86967e-05	0.00107024	2.35243
PACSIN2	-4690.96	4174.29	-4.55626	1.88798e-05	0.00107966	2.3431
TMEM30B	-3765.02	2837.5	-4.55254	1.91454e-05	0.00109378	2.32972
MEI1	-264.753	111.175	-4.53859	2.01745e-05	0.00115145	2.27958
RP11-679B19.2	-1.4329	0.2875	-4.53819	2.02046e-05	0.00115204	2.27815
2021-03-08	-2287.21	1596.56	-4.5344	2.04943e-05	0.00116742	2.26452
MBOAT1	-883.264	585.525	-4.53259	2.06334e-05	0.00117419	2.25805
CTD-2022H16.2	-2.09957	0.3125	-4.53126	2.07366e-05	0.00117806	2.25327
ACO2	-6443.8	4878.18	-4.53111	2.07488e-05	0.00117806	2.25271
ASXL3	-170.645	53.0875	-4.53094	2.07619e-05	0.00117806	2.25211
IGHV4-4	-138.494	34.7	-4.52973	2.08559e-05	0.00118159	2.24778
FXYD1	-85.1385	21.3875	-4.52962	2.08646e-05	0.00118159	2.24739
KIAA1161	-5502.63	3639.05	-4.52236	2.14396e-05	0.00121208	2.22136
RP11-384J4.2	-2.329	0.425	-4.52217	2.14549e-05	0.00121208	2.22068
HCN4	-9.41991	2.6	-4.52204	2.14652e-05	0.00121208	2.22022
IGLV3-2	-1.24242	0.1375	-4.5162	2.19393e-05	0.00123701	2.19931
ATP6V0D1	-5364.61	4777.23	-4.51609	2.19491e-05	0.00123701	2.19888
CHL1	-491.065	169.35	-4.51557	2.19918e-05	0.00123822	2.19702
ZC3H12C	-1009.48	531.712	-4.51059	2.2405e-05	0.00126027	2.17921
GPR142	-7.8961	2.4	-4.50924	2.25182e-05	0.00126542	2.17439
PLCG2	-1086.12	494.275	-4.50894	2.25436e-05	0.00126563	2.17331
SOS2	-2113.95	1797.99	-4.50747	2.26676e-05	0.00127137	2.16805
RP11-963H4.3	-30.4848	11.325	-4.50465	2.29079e-05	0.00128361	2.15796
GRIN2A	-70.7056	14.6125	-4.50394	2.29684e-05	0.00128577	2.15544
CHL1-AS2	-5.02597	1.1625	-4.49996	2.33122e-05	0.00130377	2.14122
RP11-295M18.6	-6.38961	1.85	-4.49718	2.35556e-05	0.00131612	2.13129
FOSL2	-9403.78	6931.86	-4.49628	2.36355e-05	0.00131932	2.12805
IGFBP6	-1023.42	407.962	-4.49594	2.36647e-05	0.00131969	2.12686
STMN2	-751.615	167.238	-4.49443	2.37987e-05	0.00132517	2.12147
MICALCL	-308.208	172.35	-4.49432	2.38085e-05	0.00132517	2.12107
NEGR1	-633.528	224.562	-4.488	2.43764e-05	0.00135549	2.09852
RAB27A	-1566.38	1109.36	-4.48476	2.46726e-05	0.00137066	2.08696
RAVER2	-3024.9	2195.2	-4.48315	2.48218e-05	0.00137763	2.0812
NTN1	-990.446	297.363	-4.47738	2.53612e-05	0.00140623	2.06064
NCAM1	-783.143	250.225	-4.47636	2.54578e-05	0.00141025	2.057
PLCD3	-10417.5	5113.52	-4.47523	2.55645e-05	0.00141482	2.053
SRPX	-704.784	235.312	-4.47442	2.56416e-05	0.00141774	2.05012
LEAP2	-108.965	69.7875	-4.47402	2.568e-05	0.00141852	2.04869
PINK1	-1427.07	1044.78	-4.47321	2.57575e-05	0.00142146	2.0458
AQP4	-16.4113	2.5375	-4.4694	2.61253e-05	0.00144039	2.03225
HADHB	-5060.93	4801.52	-4.46572	2.64856e-05	0.00145888	2.01915
ABCD3	-3954.81	3291.82	-4.46547	2.65106e-05	0.00145888	2.01824
PRSS36	-168.238	104.737	-4.46373	2.66828e-05	0.00146697	2.01206
IGHV3-71	-60.3593	16.2375	-4.46107	2.69483e-05	0.00148018	2.00259
AC104984.4	-2.27706	0.475	-4.4552	2.75418e-05	0.00151136	1.98176
TRIM40	-208.346	67.8	-4.45456	2.76079e-05	0.00151238	1.97947
CPNE5	-540.818	256.462	-4.45452	2.76122e-05	0.00151238	1.97932
CACNG7	-8.58009	2.075	-4.4538	2.76857e-05	0.00151498	1.97677
BMX	-269.532	85.575	-4.45035	2.80426e-05	0.00153307	1.96453
VLDLR-AS1	-42.8528	13.0875	-4.44827	2.82598e-05	0.0015435	1.95715
AC068643.1	-0.640693	0.05	-4.44601	2.84981e-05	0.00155361	1.94913
AL080243.1	-0.640693	0.05	-4.44601	2.84981e-05	0.00155361	1.94913
STK17B	-2490.65	1893.75	-4.4436	2.87544e-05	0.00156612	1.94057
FLJ31104	-10.342	6.7125	-4.44181	2.89461e-05	0.00157509	1.93421
RCAN1	-2380.28	1857.31	-4.43656	2.95143e-05	0.00160452	1.91563
VWA5A	-3135.86	1757.4	-4.43491	2.9696e-05	0.0016129	1.90977
C11orf86	-1424.66	171.762	-4.43412	2.97825e-05	0.00161609	1.90699
KIR3DL3	-3.40693	0.3875	-4.43274	2.99352e-05	0.00162287	1.9021
MYZAP	-340.039	212.713	-4.42693	3.05868e-05	0.00165665	1.88152
CDHR2	-8271.38	1957.46	-4.42629	3.06599e-05	0.00165908	1.87924
AC131263.1	-27.658	13.7125	-4.42523	3.07803e-05	0.00166404	1.8755
PQLC1	-2254.01	1751.85	-4.42395	3.09259e-05	0.00167037	1.87099
C1QTNF9	-20.013	6.7375	-4.41806	3.16075e-05	0.00170498	1.85015
PLOD2	-6264.01	3774.22	-4.41791	3.1625e-05	0.00170498	1.84962
CUX2	-9.75758	3.275	-4.41741	3.16839e-05	0.00170658	1.84785
MTND4P20	-40.2727	9.2375	-4.41482	3.19886e-05	0.0017214	1.8387
RIMS4	-60.9177	10.7	-4.41443	3.20344e-05	0.00172228	1.83734
CAPN5	-11088.2	6720.25	-4.41216	3.23054e-05	0.00173525	1.82929
PPY	-3.18615	0.6	-4.41082	3.2465e-05	0.00174222	1.82458
FAM189A2	-131.442	42.4875	-4.40744	3.2873e-05	0.0017625	1.81265
IGHVIII-51-1	-16.5498	2.7375	-4.40678	3.2954e-05	0.00176521	1.8103
PPAP2B	-2437.53	1586.88	-4.40569	3.30859e-05	0.00177066	1.80648
HEPACAM2	-3552.28	703.6	-4.40237	3.34952e-05	0.00179092	1.79473
IGLV2-5	-21.9394	5.55	-4.39726	3.41326e-05	0.00182333	1.77673
IGSF3	-1903.8	1435.26	-4.39165	3.48462e-05	0.00185975	1.75697
GCOM1	-93.8268	49.025	-4.3865	3.55142e-05	0.00189367	1.73883
TPPP2	-5.88745	2	-4.38264	3.60232e-05	0.00191906	1.72524
FCGBP	-171468	35908.8	-4.38188	3.61241e-05	0.00192268	1.72257
RP11-33I11.3	-4.71429	1.4625	-4.38098	3.62442e-05	0.00192732	1.7194
IGKV1OR2-3	-26.7706	4.9	-4.37581	3.69403e-05	0.00196254	1.70124
APOBR	-5176.32	2294.12	-4.37024	3.77044e-05	0.00200132	1.68169
GALNT15	-595.312	150.012	-4.36308	3.87113e-05	0.0020529	1.65653
TPSD1	-184.567	38.6875	-4.36218	3.88395e-05	0.00205782	1.65338
IGHV1-17	-13.1991	3.9625	-4.35798	3.94431e-05	0.00208791	1.63866
IGHV3-19	-55.8745	15.8875	-4.35616	3.97075e-05	0.0021	1.63228
MCOLN2	-1731.09	579.163	-4.35214	4.02971e-05	0.00212926	1.61821
IGSF9	-2462.94	1131.42	-4.3507	4.05115e-05	0.00213576	1.61315
SMIM6	-321.861	121.875	-4.35065	4.05186e-05	0.00213576	1.61298
IGLVI-56	-1.45887	0.2625	-4.35057	4.053e-05	0.00213576	1.61271
RP1-247F3.1	-3.91775	1.5625	-4.34926	4.07263e-05	0.00214417	1.6081
RP4-798A17.5	-10.5152	4.2125	-4.34812	4.0896e-05	0.00215117	1.60413
ADCYAP1R1	-104.368	20.2125	-4.34136	4.19222e-05	0.00220316	1.58048
FTMT	-0.614719	0.075	-4.33838	4.23834e-05	0.0022214	1.57004
RP11-495K9.10	-0.614719	0.075	-4.33838	4.23834e-05	0.0022214	1.57004
RP11-495K9.9	-0.614719	0.075	-4.33838	4.23834e-05	0.0022214	1.57004
TEX33	-1.20346	0.175	-4.33205	4.33781e-05	0.0022715	1.54791
PCDH11X	-6.4632	1.1125	-4.33117	4.35168e-05	0.00227672	1.54487
MAB21L1	-21.684	6.4625	-4.32832	4.39745e-05	0.0022986	1.53488
CCDC129	-41.9091	12.6625	-4.32682	4.42162e-05	0.00230917	1.52965
PDCD4-AS1	-89.0087	60.6625	-4.32346	4.47631e-05	0.00233564	1.51793
IGKV3D-11	-185.545	51.4125	-4.32089	4.51854e-05	0.00235557	1.50897
RP11-160O5.1	-79.8225	50.8375	-4.31062	4.69126e-05	0.00244343	1.47319
PROKR1	-7.77922	2.5125	-4.30766	4.74231e-05	0.00246782	1.46287
AMICA1	-702.511	335.5	-4.30369	4.81141e-05	0.00250155	1.44908
IGHV4-55	-299.896	69.35	-4.30283	4.82658e-05	0.0025072	1.44608
IGHV3-23	-7847.7	1972.92	-4.3024	4.83416e-05	0.00250891	1.44458
CLDN5	-875.329	303.163	-4.29949	4.88573e-05	0.00253342	1.43446
JPH4	-66.697	18.1375	-4.29703	4.92979e-05	0.002554	1.4259
IGHV3OR16-8	-61.6364	14.675	-4.29429	4.97923e-05	0.00257732	1.41639
FZD5	-4991.59	4118.93	-4.29231	5.01537e-05	0.00259373	1.40949
PLAC9	-221.905	90.75	-4.29104	5.03852e-05	0.0026034	1.4051
ANO10	-2508.16	1999.9	-4.29065	5.04582e-05	0.00260486	1.40372
FOLR2	-628.567	200.338	-4.28785	5.09751e-05	0.00262923	1.39401
C2orf40	-112.701	24.525	-4.28681	5.11677e-05	0.00263683	1.39041
RP5-1148A21.3	-124.883	59.8	-4.28365	5.17596e-05	0.00266498	1.37945
PIP5K1B	-3125.76	2228.79	-4.28209	5.20547e-05	0.00267781	1.37403
KIAA2022	-82.1861	19.5625	-4.28155	5.21571e-05	0.00268072	1.37216
RP11-449D8.5	-3.19481	0.925	-4.27683	5.30602e-05	0.00272474	1.3558
KRT9	-9.11688	2.225	-4.27542	5.33324e-05	0.00273631	1.35092
GSTM5	-225.32	69.4625	-4.27422	5.35658e-05	0.00274587	1.34676
LY9	-166.281	65.2875	-4.27361	5.36841e-05	0.00274952	1.34466
IGHV1OR16-2	-1.47186	0.25	-4.27301	5.38022e-05	0.00275315	1.34256
RP11-334E6.3	-2.58442	0.5125	-4.27101	5.41941e-05	0.00277078	1.33565
HERPUD1	-4579.96	4848.79	-4.26901	5.45908e-05	0.00278862	1.3287
ARHGEF37	-1152.23	646.312	-4.26617	5.51567e-05	0.00281507	1.31887
C1orf186	-85.2727	26.925	-4.26586	5.52175e-05	0.00281571	1.31782
CASP5	-558.212	219.387	-4.26405	5.55813e-05	0.00283178	1.31156
RP11-174B4.2	-7.92641	2.0375	-4.25773	5.68726e-05	0.00289505	1.28968
KIF13B	-6224.56	3974.86	-4.25719	5.6983e-05	0.00289814	1.28783
SOWAHA	-1174.54	676.837	-4.25634	5.71585e-05	0.00290454	1.2849
HMP19	-149.329	29.9375	-4.25523	5.73899e-05	0.00291376	1.28105
IGKV1OR2-2	-3.48052	0.65	-4.2546	5.75217e-05	0.00291679	1.27887
IGLV5-48	-15.645	4.275	-4.25446	5.75496e-05	0.00291679	1.27841
CCR10	-44.9264	21.425	-4.25018	5.8451e-05	0.00295991	1.2636
LETM1	-4800.59	3629.76	-4.24762	5.89943e-05	0.00298432	1.25479
RP3-368B9.2	-3.05628	0.725	-4.24743	5.90352e-05	0.00298432	1.25413
CKMT1A	-878.853	543.438	-4.24686	5.91569e-05	0.00298788	1.25217
COL4A6	-171.043	52.0375	-4.24652	5.92303e-05	0.002989	1.25099
C10orf105	-5.12554	1.4	-4.24618	5.93031e-05	0.0029901	1.24982
BEND4	-33.1342	9.775	-4.24444	5.96792e-05	0.00300646	1.24379
ACAA1	-2950.08	2312.55	-4.24277	6.004e-05	0.00302203	1.23805
HMCN2	-1566.16	597.237	-4.23795	6.10972e-05	0.00307259	1.22143
MYO1D	-29365.5	20059.7	-4.23568	6.15998e-05	0.00309521	1.21363
CTD-2507G9.1	-0.909091	0.125	-4.22973	6.29412e-05	0.00315735	1.19311
VIT	-66.684	18.15	-4.22971	6.29449e-05	0.00315735	1.19306
RP11-296O14.3	-51.7835	28.825	-4.22935	6.30262e-05	0.00315872	1.19183
SLC6A9	-1436.75	867.462	-4.22694	6.35777e-05	0.00318363	1.18353
GGT6	-5529.93	2966.11	-4.22212	6.46943e-05	0.00323677	1.16696
B3GALT5-AS1	-187.199	30.4875	-4.21929	6.53591e-05	0.00326723	1.15723
NEFM	-56.3723	12.075	-4.20731	6.82468e-05	0.00340827	1.11607
RCSD1	-815.338	385.238	-4.2071	6.82972e-05	0.00340827	1.11537
EHHADH	-1308.88	986.538	-4.20631	6.84916e-05	0.00341504	1.11266
LPHN3	-348.615	130.125	-4.20446	6.895e-05	0.00343497	1.10632
CROT	-1106.01	733.8	-4.20265	6.94011e-05	0.00345379	1.10011
ELMSAN1	-2176.2	1803.74	-4.20247	6.94461e-05	0.00345379	1.09949
RP11-482M8.3	-1.45887	0.2625	-4.18892	7.29171e-05	0.00362333	1.05308
RNU6-1065P	-5.91342	1.975	-4.18656	7.35379e-05	0.00365107	1.04502
ATG4D	-1135.59	1012.33	-4.18332	7.43998e-05	0.00369072	1.03393
IGLV3-12	-53.9957	11.3625	-4.18275	7.4552e-05	0.00369513	1.03199
IGLL3P	-6.20779	2.025	-4.17954	7.54166e-05	0.00373482	1.02102
PRIMA1	-531.078	90.8375	-4.1775	7.59721e-05	0.00375914	1.01404
RP11-640L9.1	-21.1775	4.95	-4.17723	7.60436e-05	0.00375949	1.01314
COL19A1	-31.1126	7.3875	-4.17622	7.63201e-05	0.00376997	1.00969
IGLV2-33	-27.6407	5.0625	-4.17392	7.69528e-05	0.00379801	1.00184
AC114973.1	-1.52381	0.2	-4.17099	7.77673e-05	0.00383497	0.991826
SIDT2	-2130.63	1762.94	-4.16933	7.82316e-05	0.00385461	0.986164
IGLV5-52	-10.7229	3.0125	-4.16706	7.88706e-05	0.00388282	0.978428
EGLN1	-2598.22	2499.55	-4.1631	7.99978e-05	0.00393499	0.964933
LINC00908	-6.98268	2.6125	-4.1623	8.02272e-05	0.00394295	0.96221
C5orf66-AS1	-21.8095	8.675	-4.16063	8.07083e-05	0.00396326	0.956525
CYP4F12	-1888.82	1039.67	-4.15925	8.11087e-05	0.00397957	0.95182
DNAJC28	-57.987	34.1875	-4.15845	8.13413e-05	0.00398764	0.949097
CTC-436P18.3	-43.3377	12.2875	-4.15791	8.14999e-05	0.00399206	0.947244
STOX2	-216.134	59.6375	-4.15647	8.19197e-05	0.00400926	0.94236
CCL15	-394.394	236.062	-4.15482	8.24052e-05	0.00402725	0.936742
PLD1	-2226.59	1519.24	-4.15476	8.24253e-05	0.00402725	0.93651
B4GALT1	-7595.42	7080.07	-4.15398	8.2654e-05	0.00403505	0.933875
SUSD6	-4065.57	3211.89	-4.15185	8.32856e-05	0.00406054	0.926639
IGHM	-49142.7	9974.81	-4.15175	8.33153e-05	0.00406054	0.926299
RP11-613F22.7	-2.35498	0.4	-4.13685	8.78747e-05	0.00427918	0.875654
GLRA4	-87.2727	18	-4.12236	9.25366e-05	0.00450245	0.826534
KCNA3	-84.9351	30.25	-4.12191	9.26859e-05	0.00450595	0.825002
MAN1A1	-4277.17	3069.89	-4.12003	9.33089e-05	0.00453247	0.818637
LRRC75A	-1254.03	1061.66	-4.11589	9.46935e-05	0.0045959	0.804644
RP11-1260E13.2	-47.29	28.15	-4.11306	9.56542e-05	0.00463867	0.795055
KIAA0125	-252.32	79.475	-4.11262	9.58054e-05	0.00464215	0.793554
CCL16	-6.68831	2.5625	-4.11039	9.65661e-05	0.00467513	0.786042
TOM1L2	-2745.57	2151.39	-4.1087	9.71488e-05	0.00469944	0.780327
TUBB4A	-110.398	23.075	-4.10736	9.76147e-05	0.00471807	0.775783
RP11-255G12.3	-1.20346	0.175	-4.10326	9.90492e-05	0.00478345	0.761928
RP11-1090M7.3	-13.9827	3.875	-4.10256	9.92934e-05	0.00479128	0.759589
TAT-AS1	-3.94372	1.5375	-4.10117	9.97869e-05	0.00481111	0.754881
IGLV2-28	-39.0996	8.7	-4.10006	0.000100182	0.00482617	0.751129
CTC-558O2.1	-44.0043	12.3125	-4.09962	0.000100337	0.00482967	0.749657
ACVRL1	-3586.92	2523.93	-4.09872	0.000100659	0.00484118	0.746615
GCNT3	-19409.1	4668.43	-4.093	0.000102725	0.00493647	0.727325
CD163	-3671.33	1113.01	-4.08566	0.000105437	0.00506262	0.702585
RP11-367J11.3	-14.368	8.8375	-4.08502	0.000105676	0.00506995	0.700431
NUGGC	-156.061	44.125	-4.08303	0.000106425	0.00510168	0.693729
ABCB5	-35.8268	7.85	-4.08267	0.000106559	0.0051039	0.692536
AC244250.2	-188.554	36.85	-4.08221	0.000106733	0.00510804	0.690989
TMEM45B	-8097.48	5860.18	-4.07907	0.000107928	0.00516099	0.68042
EBI3	-145.082	63.025	-4.074	0.000109884	0.00525024	0.66337
PRKACB	-5580.25	2625.68	-4.07359	0.000110042	0.00525349	0.662007
VLDLR	-720.32	322.025	-4.07246	0.000110483	0.00527024	0.658209
AC092667.2	-3.10823	0.675	-4.07192	0.000110697	0.00527613	0.656373
UGT1A1	-317.671	43.575	-4.06889	0.000111891	0.00532868	0.646194
CYSLTR1	-120.844	66.6875	-4.06834	0.000112106	0.00533432	0.644366
IGHV3-33	-1490.68	508.55	-4.06813	0.000112192	0.00533432	0.643644
ANKRD9	-2679.92	1730.91	-4.06759	0.000112406	0.00534015	0.641834
MMP28	-1524.43	382.4	-4.06699	0.000112645	0.00534717	0.639815
ZER1	-2710.83	2437.82	-4.06619	0.000112962	0.00535785	0.637151
MPI	-1610.9	1376.51	-4.06492	0.000113471	0.0053749	0.632882
CTD-2562J17.6	-762.532	430.062	-4.06484	0.000113506	0.0053749	0.632596
ACAT1	-3840.25	2514.76	-4.06371	0.000113957	0.0053919	0.628829
ADH6	-768.394	323.087	-4.06336	0.000114101	0.00539436	0.627628
SFXN1	-2669.81	2524.31	-4.05981	0.000115541	0.00545801	0.615729
FAM95B1	-4.32684	1.16875	-4.05436	0.000117785	0.00555675	0.597482
ATP2B1	-3606.39	3011.51	-4.05428	0.000117822	0.00555675	0.597184
PTPRF	-24238.5	19810.4	-4.05245	0.000118584	0.00558818	0.591068
C10orf99	-6651	3107.75	-4.04528	0.000121623	0.00572675	0.567066
TLR7	-183.84	87.3875	-4.04493	0.000121773	0.00572924	0.56589
TCEAL5	-20.368	4.0625	-4.04268	0.000122742	0.00577018	0.558372
IGHV3-63	-70.1212	18.175	-4.03963	0.00012407	0.0058279	0.54817
hsa-mir-4538	-6.58442	1.6625	-4.03919	0.000124262	0.00583224	0.5467
TCP11L1	-409.091	349.25	-4.03843	0.000124594	0.0058431	0.544173
TRPC7-AS1	-31.658	10.8625	-4.03812	0.000124729	0.00584477	0.543142
MAPK6	-2843.26	2532.7	-4.03651	0.000125442	0.00587345	0.537739
TCN2	-1600.24	953.1	-4.03566	0.000125817	0.00588629	0.534907
RP11-123J14.4	-6.79654	3.125	-4.03499	0.000126116	0.00589554	0.532659
BMF	-1385.8	899.837	-4.03341	0.000126818	0.00592361	0.527396
VSIG4	-1723.06	506.55	-4.03283	0.000127077	0.00593098	0.525458
RAB6B	-465.113	213.662	-4.03231	0.000127309	0.00593705	0.52373
MAFA	-11.5628	3.5375	-4.03135	0.000127741	0.00595246	0.520516
STAP2	-4744.5	3994.75	-4.02531	0.000130486	0.00607553	0.500356
SLC2A13	-1398.38	747.725	-4.02188	0.00013207	0.00614437	0.488918
CDH19	-197.121	41.9375	-4.0212	0.000132387	0.0061542	0.486648
ADAMTSL1	-540.623	232.65	-4.02042	0.000132747	0.00616605	0.484069
RP11-227H15.4	-74.2857	19.5	-4.01933	0.000133258	0.00618482	0.480433
RP5-857K21.7	-7746.17	965.312	-4.01763	0.000134056	0.00621692	0.474773
FLNB	-32839.5	22461	-4.01712	0.000134297	0.00622315	0.47307
FKBP5	-3476.71	2389.34	-4.0152	0.000135207	0.00626038	0.466665
RP11-514F3.5	-20.7576	5.6875	-4.01496	0.000135318	0.00626054	0.465889
PTK2B	-3292.28	2376.85	-4.01439	0.000135589	0.00626812	0.463991
SLC9A9	-321.212	147.5	-4.01367	0.000135935	0.00627915	0.461575
STIM1	-2574.21	2412.32	-4.00768	0.000138824	0.00640752	0.441644
IGLV2-23	-4670.74	1513.41	-4.005	0.000140133	0.00646284	0.432748
TP53I3	-1819.62	1379.61	-4	0.000142611	0.00657191	0.416141
RP1-148H17.1	-2.78788	0.65	-3.99975	0.000142735	0.00657245	0.415316
ERBB4	-17.961	3.7125	-3.998	0.000143613	0.00660767	0.409505
TJP3	-6230.29	4243.35	-3.99675	0.000144246	0.00663158	0.405337
OASL	-2533.26	743.737	-3.99437	0.000145455	0.00668189	0.39743
BCL2	-796.472	460.062	-3.99404	0.000145623	0.00668435	0.396336
RP11-756A22.7	-20.3247	8.4375	-3.99253	0.000146392	0.00671088	0.391349
SPINK2	-37.0952	9.9625	-3.99246	0.000146431	0.00671088	0.391096
MYT1L	-12.6104	2.8625	-3.98815	0.000148653	0.00680659	0.376829
PDLIM2	-835.026	580.288	-3.98784	0.000148814	0.00680659	0.3758
F2RL1	-6012.58	4600.56	-3.98774	0.000148869	0.00680659	0.375452
CKMT1B	-1088.69	716.8	-3.98529	0.00015015	0.00685979	0.367336
PRKCB	-683.398	290.562	-3.98403	0.000150813	0.00688467	0.363165
SLC31A2	-89.1948	49.15	-3.97882	0.000153582	0.00700561	0.34593
IGKV2D-36	-0.627706	0.0625	-3.97775	0.00015416	0.00702101	0.342373
RP11-575G13.3	-0.627706	0.0625	-3.97775	0.00015416	0.00702101	0.342373
RPH3A	-11.974	4.475	-3.97645	0.000154861	0.00704332	0.338074
TRGV3	-5.94805	2.275	-3.97639	0.000154891	0.00704332	0.337892
IGHV1-12	-51.2771	15.3125	-3.976	0.000155103	0.00704747	0.336597
CNTN1	-195.303	64.6875	-3.97434	0.000156006	0.00708298	0.3311
RP11-34D15.2	-1.5974	0.4625	-3.97019	0.000158285	0.00717085	0.317365
AC004947.2	-17.7446	4.5875	-3.97018	0.000158286	0.00717085	0.317361
TTLL6	-259.433	91.9625	-3.97014	0.00015831	0.00717085	0.317218
NRG2	-25.7143	9.25	-3.96733	0.000159871	0.00723595	0.307927
SHISA3	-155.398	54.7625	-3.9648	0.000161285	0.00729429	0.29959
RP11-70C1.3	-3.671	0.8	-3.96328	0.000162147	0.00732394	0.294545
RP11-266I3.9	-2.81385	0.625	-3.9632	0.000162191	0.00732394	0.294284
CCR2	-226.39	87.1	-3.96239	0.000162647	0.00733886	0.291626
MFAP5	-950.104	336.525	-3.95962	0.000164228	0.00740444	0.282472
NWD2	-164.827	29.6875	-3.95628	0.000166146	0.00748515	0.271478
SPATA24	-138.987	122.225	-3.94795	0.000171038	0.00769962	0.24401
MAST2	-4825.91	4030.72	-3.93981	0.000175945	0.00791439	0.217247
RP11-598D12.1	-3.18615	0.6	-3.93838	0.000176823	0.00794778	0.212534
CH17-52D20.1	-0.935065	0.1	-3.93666	0.000177884	0.00798933	0.206873
JOSD1	-4034.44	3706.85	-3.93444	0.000179262	0.00804501	0.199574
GSN	-26057.1	14851.1	-3.93317	0.000180051	0.00807183	0.195416
RP11-812E19.9	-45.7229	12.325	-3.93303	0.000180136	0.00807183	0.194971
RNASEL	-779.931	666.65	-3.9316	0.000181035	0.00810588	0.190264
ENPP2	-1361.21	717.5	-3.9289	0.00018274	0.00817599	0.181391
PCP4L1	-55.7489	17.675	-3.92737	0.000183714	0.00821326	0.176365
KLRB1	-188.584	103.487	-3.92593	0.000184631	0.00824792	0.171657
RP11-800A3.4	-422.061	201.1	-3.91998	0.000188477	0.0084133	0.152157
RP11-1399P15.1	-35.7403	9.6	-3.91863	0.000189362	0.00844634	0.147726
LINC00294	-405.017	401.837	-3.91586	0.000191191	0.00852142	0.138635
AC002511.2	-19.632	7.4375	-3.91164	0.000194005	0.00864025	0.124818
OR2T8	-3.41558	0.7125	-3.90707	0.000197091	0.00877099	0.109897
GINM1	-1240.81	1486.72	-3.90531	0.000198293	0.00881778	0.104147
CASC18	-8.35931	3.2875	-3.90373	0.000199381	0.00885941	0.0989743
RP11-148L24.1	-7.38095	1.5625	-3.90317	0.000199765	0.00886973	0.0971539
RP11-526A4.1	-27.2857	7.7375	-3.90119	0.000201141	0.00892403	0.0906659
STX12	-1597.25	2084.31	-3.89975	0.000202147	0.00896183	0.085952
HSPB3	-243.156	33.9625	-3.8955	0.000205131	0.00908723	0.0720996
CASC16	-14.7489	7.1375	-3.89156	0.000207938	0.00920459	0.0592545
PTP4A1	-9986	9778.81	-3.89082	0.000208472	0.00922123	0.0568311
SLC9A3R1	-6517.7	4642.71	-3.89041	0.000208768	0.00922369	0.0554874
IGKV2D-18	-4.74459	1.1	-3.89031	0.000208843	0.00922369	0.0551484
AC246787.3	-8.75758	2.2375	-3.88791	0.000210574	0.0092931	0.0473487
TCF21	-373.848	179.838	-3.88694	0.000211283	0.00931737	0.0441694
IGLJ7	-0.601732	0.0875	-3.88553	0.00021231	0.0093556	0.0395868
KCTD9P6	-1.82684	0.575	-3.88489	0.000212782	0.00936931	0.0374903
PHOX2A	-20.6926	4.75	-3.88354	0.000213772	0.00940581	0.0331038
ARPP21	-11.4372	2.325	-3.88254	0.00021451	0.00943119	0.0298463
PIGR	-322870	115758	-3.88152	0.000215264	0.0094511	0.0265312
CCNYL1	-1323.36	1159.6	-3.88142	0.000215343	0.0094511	0.0261864
DAAM2	-1089.43	447.425	-3.88127	0.000215449	0.0094511	0.025721
PRSS12	-973.74	673.775	-3.88029	0.000216181	0.0094761	0.0225155
IGHV4-31	-1130.06	301.65	-3.87851	0.000217505	0.009527	0.016745
MPP5	-1670.26	1589.04	-3.87186	0.000222546	0.0097405	-0.00490059
GNG8	-9.92208	3.45	-3.87066	0.000223465	0.00977337	-0.0087913
MIPOL1	-465.221	253.225	-3.86916	0.000224618	0.00981646	-0.0136544
VSIG2	-4762.81	1403.46	-3.86763	0.000225805	0.00986096	-0.0186326
EFCAB5	-60.4719	40.4625	-3.86661	0.000226597	0.00988815	-0.0219399
REP15	-246.385	66.1875	-3.86348	0.000229046	0.00998754	-0.0320919
RP11-832A4.7	-40.5281	15.325	-3.85557	0.000235357	0.0102551	-0.0577607
FHL1	-4532.51	1461.46	-3.85489	0.000235907	0.0102714	-0.0599647
SIGLEC1	-968.372	328.275	-3.8528	0.000237602	0.0103375	-0.0667232
IGKV1OR9-2	-8.0303	1.9375	-3.852	0.000238256	0.0103574	-0.0693168
SSBP2	-447.81	284.65	-3.85181	0.000238416	0.0103574	-0.0699525
DYRK2	-3862.24	3442.93	-3.84986	0.000240012	0.010419	-0.0762509
CMA1	-81.1732	13.5375	-3.84701	0.000242367	0.0105134	-0.0854701
RP11-710C12.1	-15.4719	7.775	-3.84598	0.000243226	0.0105391	-0.0888102
SMIM2	-14.0736	4.7875	-3.84587	0.000243319	0.0105391	-0.0891706
DPP6	-152.312	30.4	-3.84481	0.000244202	0.0105695	-0.0925888
RP11-416N2.3	-2.22511	0.525	-3.84451	0.000244452	0.0105725	-0.0935572
ZNF229	-46.6147	20.8	-3.84251	0.000246132	0.0106373	-0.100023
CXCL12	-2716.55	1173.99	-3.84009	0.000248185	0.010718	-0.10786
TMEM59	-11003.1	12988.2	-3.83787	0.000250079	0.0107918	-0.115036
MTRNR2L13	-3.31169	0.8125	-3.83492	0.000252614	0.0108932	-0.124555
SLC47A1	-124.71	49.3	-3.82841	0.000258298	0.0111301	-0.145556
IGKV1D-42	-60.013	15.2375	-3.82641	0.000260067	0.011198	-0.151996
NLRP7	-16.7619	7.2	-3.82414	0.000262099	0.0112772	-0.159337
EPHX2	-3130.1	1871.61	-3.82215	0.000263882	0.0113456	-0.165734
PPP1R36	-316.346	178.85	-3.82031	0.000265549	0.0114088	-0.171676
RP11-707F2.1	-2.36797	0.3875	-3.81996	0.000265864	0.011414	-0.172794
SMIM2-AS1	-513.316	207.6	-3.81714	0.000268435	0.0115159	-0.181872
PTGS1	-1600.27	784.075	-3.81246	0.000272756	0.0116926	-0.196934
RP11-102N12.3	-17.645	9.35	-3.80995	0.000275097	0.0117844	-0.204996
CMAHP	-432.771	232.125	-3.80859	0.00027638	0.0118307	-0.209386
NIPAL1	-1789.34	1380.42	-3.80836	0.000276596	0.0118312	-0.210122
RHBDL2	-819.082	397.3	-3.80672	0.000278141	0.0118886	-0.215376
TMEM63C	-887.416	384.863	-3.80329	0.000281407	0.0120194	-0.226384
SMPD1	-2593.84	1289.42	-3.80046	0.000284137	0.0121271	-0.235488
RP11-5G18.2	-0.857143	0.175	-3.79904	0.000285512	0.0121769	-0.240037
RXRA	-3934.04	3408.15	-3.79817	0.000286355	0.0122039	-0.242819
EMP1	-18097.3	6805.04	-3.79294	0.000291498	0.0124141	-0.2596
ACADM	-2538.14	1985.38	-3.78983	0.000294593	0.0125367	-0.269556
RP11-543C4.1	-4.30736	2.1875	-3.78563	0.000298821	0.0127074	-0.28299
MAPK3	-6093.31	5460.52	-3.78219	0.000302336	0.0128475	-0.29401
C19orf35	-40.3636	24.15	-3.77789	0.00030678	0.0130269	-0.307762
FCER1A	-86.5022	32.075	-3.77658	0.000308145	0.0130753	-0.311945
ARNTL	-431.372	414.137	-3.77484	0.000309966	0.0131431	-0.317499
LINC01082	-51.9134	25.7	-3.77257	0.000312366	0.0132352	-0.324765
RPS15AP11	-22.632	12.55	-3.77204	0.000312921	0.0132491	-0.326437
RN7SL491P	-1.1645	0.2125	-3.77165	0.00031334	0.0132522	-0.3277
PPARGC1B	-1502.99	919.375	-3.77155	0.000313448	0.0132522	-0.328023
FRMD4B	-834.567	804.062	-3.7694	0.000315739	0.0133394	-0.334884
RP11-440I14.2	-17.6104	6.05	-3.76724	0.000318051	0.0134273	-0.341757
MS4A4A	-667.667	286.038	-3.76272	0.000322958	0.0136247	-0.35618
RP11-239H6.2	-1.80087	0.6	-3.75809	0.000328053	0.0138296	-0.370924
LINC01013	-19.4329	5.9625	-3.75706	0.000329202	0.0138619	-0.374218
IGLV3-19	-3563.63	1205.34	-3.75697	0.000329292	0.0138619	-0.374476
FOXF2	-521.225	257.988	-3.75634	0.000329997	0.0138815	-0.376489
IGHV3-73	-663.844	186.05	-3.75613	0.000330234	0.0138815	-0.377165
GCSAML	-26.0563	10.5875	-3.75519	0.000331282	0.0139155	-0.380148
BTD	-666.195	645.788	-3.75093	0.000336088	0.0141072	-0.393713
SCN4B	-191.623	92.5625	-3.74874	0.00033858	0.0142016	-0.400668
AC027612.4	-3.71861	1.0875	-3.74812	0.000339293	0.0142213	-0.402649
RP11-848P1.7	-7.4632	4.15	-3.7459	0.000341846	0.0143181	-0.409708
MIR126	-3.52381	1.275	-3.74492	0.000342978	0.0143552	-0.412819
ADRA1A	-11.4935	3.9375	-3.74337	0.000344773	0.01442	-0.417735
RP11-209D14.2	-2.10823	0.6375	-3.74274	0.000345503	0.0144384	-0.419725
CAPN13	-754.251	376.7	-3.74257	0.000345708	0.0144384	-0.420285
IGKV1-5	-6863.69	2418.36	-3.73931	0.000349527	0.0145874	-0.430627
HLX-AS1	-2.82251	0.95	-3.73838	0.000350622	0.0146227	-0.433571
HECTD3	-3464.96	3399.31	-3.73816	0.000350888	0.0146233	-0.434286
KRT222	-3.93723	1.54375	-3.73733	0.00035186	0.0146534	-0.436889
GPD1L	-3407.7	2724.43	-3.7353	0.00035428	0.0147437	-0.443341
RP11-671J11.7	-1.90043	0.8375	-3.73478	0.000354904	0.0147542	-0.444998
TMEM132B	-52.303	25.325	-3.73466	0.000355039	0.0147542	-0.445356
CCL28	-3228.57	1276.5	-3.73051	0.000360036	0.0149512	-0.458509
SPECC1L	-1357.35	1213.55	-3.72829	0.000362746	0.015053	-0.465566
ACVR1C	-582.866	314.325	-3.71988	0.000373153	0.0154739	-0.492183
MPND	-1172.38	1124.59	-3.71925	0.000373934	0.0154953	-0.494149
GRIA4	-53.0173	18.6375	-3.7178	0.000375765	0.0155601	-0.498745
RP11-708H21.1	-6.33766	0.9	-3.71691	0.000376889	0.0155956	-0.501554
CCL15-CCL14	-69.3506	35.25	-3.71616	0.000377838	0.0156238	-0.503922
RP11-479A21.1	-3.80952	1	-3.71157	0.000383711	0.0158555	-0.518431
CPEB1	-66.3333	22.4875	-3.70918	0.000386801	0.0159718	-0.525976
RHOF	-525.788	239.262	-3.70381	0.000393826	0.0162504	-0.542902
RP11-321M21.4	-1.17749	0.2	-3.70165	0.000396692	0.0163571	-0.549721
ARHGEF18	-712.429	533.288	-3.69913	0.000400047	0.0164725	-0.557641
POU2AF1	-1116.5	430.7	-3.69913	0.000400055	0.0164725	-0.557658
SLAMF7	-1289.77	592.6	-3.69426	0.000406627	0.0167313	-0.572979
AC104699.1	-18.7056	7.6625	-3.68815	0.000415019	0.0170646	-0.592183
IGKV1D-33	-31.6234	5.5625	-3.6863	0.000417598	0.0171586	-0.598007
RP11-524H19.2	-22.4935	9.35	-3.68599	0.000418038	0.0171646	-0.598997
MPC1	-1774.94	1529.29	-3.68467	0.000419881	0.0172281	-0.603131
JAM2	-609.567	263.625	-3.6843	0.000420394	0.0172292	-0.604279
VN1R85P	-1.7013	0.3625	-3.68423	0.000420497	0.0172292	-0.60451
NRG1	-286.087	113.975	-3.68386	0.00042102	0.0172385	-0.605677
PIANP	-73.4113	29.675	-3.68221	0.000423339	0.0173213	-0.610841
HADHA	-10382.6	11245.8	-3.67926	0.000427544	0.0174811	-0.62013
RP11-542B15.1	-9.78355	4.25	-3.67686	0.000430973	0.0176041	-0.627636
RP11-644A7.2	-10.0043	4.0375	-3.67663	0.000431311	0.0176041	-0.628373
ZNF812	-8.68831	3.6375	-3.67653	0.000431456	0.0176041	-0.628688
IGKV1-32	-1.49784	0.225	-3.67521	0.000433354	0.0176691	-0.632812
FAM21C	-1281.02	1322.69	-3.67281	0.000436844	0.017799	-0.640349
C16orf54	-206.939	95.4875	-3.67167	0.000438498	0.017854	-0.6439
GSTA2	-7.77922	3.5125	-3.67086	0.000439683	0.0178898	-0.646437
RP11-442O1.4	-4.17749	2.3125	-3.67036	0.000440431	0.0179077	-0.648032
FAM214A	-946.372	845.45	-3.66915	0.000442202	0.0179672	-0.651804
PGM5P4-AS1	-2.05628	0.6875	-3.66783	0.000444161	0.0180342	-0.655955
KRT8P42	-43.3117	17.3125	-3.66753	0.000444591	0.0180392	-0.656866
IL5RA	-22.0736	8.0875	-3.66712	0.000445205	0.0180515	-0.658163
XDH	-2583.09	984.112	-3.6654	0.00044776	0.0181048	-0.663537
SCAMP2	-6977.39	6836.26	-3.66088	0.000454558	0.0181048	-0.677692
ADAM28	-645.29	355.575	-3.6607	0.000454834	0.0181048	-0.678261
GNA13	-3232.51	3281.38	-3.66042	0.000455258	0.0181048	-0.679136
AC005549.2	-0.87013	0.1625	-3.65955	0.000456564	0.0181048	-0.681828
RP3-413H6.2	-1.85281	0.55	-3.6591	0.000457258	0.0181048	-0.683254
TCEA3	-4334.85	2762.38	-3.65816	0.000458693	0.0181048	-0.686197
AC002979.1	-0.320346	0.025	-3.65801	0.000458923	0.0181048	-0.686667
AC004673.1	-0.320346	0.025	-3.65801	0.000458923	0.0181048	-0.686667
AC005777.3	-0.320346	0.025	-3.65801	0.000458923	0.0181048	-0.686667
AC018685.2	-0.320346	0.025	-3.65801	0.000458923	0.0181048	-0.686667
AC026495.1	-0.320346	0.025	-3.65801	0.000458923	0.0181048	-0.686667
AC234582.2	-0.320346	0.025	-3.65801	0.000458923	0.0181048	-0.686667
AF111168.1	-0.320346	0.025	-3.65801	0.000458923	0.0181048	-0.686667
AL360178.1	-0.320346	0.025	-3.65801	0.000458923	0.0181048	-0.686667
ATP5LP5	-0.320346	0.025	-3.65801	0.000458923	0.0181048	-0.686667
CTD-2046I8.1	-0.320346	0.025	-3.65801	0.000458923	0.0181048	-0.686667
HMGB3P12	-0.320346	0.025	-3.65801	0.000458923	0.0181048	-0.686667
MED15P6	-0.320346	0.025	-3.65801	0.000458923	0.0181048	-0.686667
MIR5703	-0.320346	0.025	-3.65801	0.000458923	0.0181048	-0.686667
MIR887	-0.320346	0.025	-3.65801	0.000458923	0.0181048	-0.686667
PRR23D2	-0.320346	0.025	-3.65801	0.000458923	0.0181048	-0.686667
RNU6-675P	-0.320346	0.025	-3.65801	0.000458923	0.0181048	-0.686667
RNU6-714P	-0.320346	0.025	-3.65801	0.000458923	0.0181048	-0.686667
RNU6-776P	-0.320346	0.025	-3.65801	0.000458923	0.0181048	-0.686667
RNY1P7	-0.320346	0.025	-3.65801	0.000458923	0.0181048	-0.686667
RP11-21G20.3	-0.320346	0.025	-3.65801	0.000458923	0.0181048	-0.686667
RP11-232C2.2	-0.320346	0.025	-3.65801	0.000458923	0.0181048	-0.686667
RP11-23A22.1	-0.320346	0.025	-3.65801	0.000458923	0.0181048	-0.686667
RP11-357K6.1	-0.320346	0.025	-3.65801	0.000458923	0.0181048	-0.686667
RP11-371M22.1	-0.320346	0.025	-3.65801	0.000458923	0.0181048	-0.686667
RP11-449M6.3	-0.320346	0.025	-3.65801	0.000458923	0.0181048	-0.686667
RP11-486M3.3	-0.320346	0.025	-3.65801	0.000458923	0.0181048	-0.686667
RP11-589F4.2	-0.320346	0.025	-3.65801	0.000458923	0.0181048	-0.686667
RP11-597A11.2	-0.320346	0.025	-3.65801	0.000458923	0.0181048	-0.686667
RP11-945A11.1	-0.320346	0.025	-3.65801	0.000458923	0.0181048	-0.686667
RPL12P3	-0.320346	0.025	-3.65801	0.000458923	0.0181048	-0.686667
SLC25A15P1	-0.320346	0.025	-3.65801	0.000458923	0.0181048	-0.686667
TOMM22P2	-0.320346	0.025	-3.65801	0.000458923	0.0181048	-0.686667
TRAJ60	-0.320346	0.025	-3.65801	0.000458923	0.0181048	-0.686667
CYP2C9	-113.26	31.9875	-3.65693	0.000460576	0.0181578	-0.690044
RP11-17M24.1	-6.06926	0.825	-3.6554	0.000462926	0.0182381	-0.694824
HAGLR	-1512.09	572.612	-3.65475	0.000463922	0.018265	-0.696841
FAM129A	-1765.63	773.25	-3.64552	0.000478375	0.0188214	-0.725649
EFCAB1	-9.06926	4.9375	-3.6429	0.000482555	0.018973	-0.733815
RP11-582J16.3	-1.58442	0.475	-3.6423	0.000483504	0.0189869	-0.735661
FCGRT	-12485.9	9201.67	-3.64227	0.000483558	0.0189869	-0.735765
HTR3B	-1.68831	0.375	-3.64142	0.000484922	0.0190276	-0.738408
PNOC	-62.5368	24.475	-3.64107	0.000485486	0.0190317	-0.739501
LGR4	-4050	3566.88	-3.64095	0.000485677	0.0190317	-0.739869
IGHV3-30	-2319.66	717.663	-3.63531	0.000494858	0.0193785	-0.757447
MYH13	-16.987	4.65	-3.63364	0.0004976	0.0194728	-0.762634
RP11-70D24.2	-8.52381	4.4625	-3.63061	0.000502624	0.0196562	-0.772061
TGFA	-1706.26	1207.06	-3.62995	0.000503716	0.0196857	-0.774097
SLC44A4	-20279.6	13385.5	-3.62877	0.0005057	0.01975	-0.777787
RP11-400N9.1	-9.68831	4.675	-3.62761	0.000507646	0.0198128	-0.781391
B3GALT4	-622.606	500.075	-3.62653	0.000509459	0.0198703	-0.784736
MEF2C	-1008.95	619.888	-3.62433	0.000513185	0.0200022	-0.791572
PDE7B	-154.346	73.775	-3.61753	0.000524855	0.0204434	-0.812667
CSN1S1	-8.80087	1.8625	-3.61511	0.00052906	0.0205912	-0.820153
AC064847.4	-0.614719	0.075	-3.61454	0.00053006	0.0205912	-0.821924
OR2AM1P	-0.614719	0.075	-3.61454	0.00053006	0.0205912	-0.821924
RP11-2L8.2	-0.614719	0.075	-3.61454	0.00053006	0.0205912	-0.821924
FNIP2	-2313.31	2170.44	-3.61341	0.000532036	0.0206543	-0.825415
APOBEC3B-AS1	-1.1645	0.2125	-3.60795	0.000541715	0.0210021	-0.842323
RP11-795H16.3	-1.1645	0.2125	-3.60795	0.000541715	0.0210021	-0.842323
CORO2A	-3757.37	2891.2	-3.60562	0.000545905	0.0211505	-0.849548
GRAMD4	-3214.9	2848.99	-3.60208	0.000552309	0.0213844	-0.860484
GFRA3	-101.45	28.6875	-3.59647	0.000562615	0.021769	-0.877817
SH3BGRL2	-6576.48	5991.8	-3.59318	0.000568748	0.0219917	-0.88798
LINC01080	-11.2684	2.4875	-3.5884	0.000577755	0.0223252	-0.902708
RP11-45P22.2	-1.20346	0.175	-3.58707	0.000580296	0.0224086	-0.906821
MZB1	-1429.73	602.888	-3.58683	0.000580748	0.0224112	-0.907551
RP11-478K15.6	-88.5714	30.75	-3.58494	0.000584378	0.0225364	-0.913389
ECE1	-8198.7	7206.09	-3.58418	0.000585839	0.0225778	-0.915729
RP11-326I11.4	-4.35065	1.8125	-3.58153	0.000590967	0.0227604	-0.923896
PAMR1	-353.13	203.113	-3.58074	0.000592491	0.0228041	-0.926309
RP11-805I24.3	-31.5801	16.9375	-3.57996	0.000594019	0.0228419	-0.928722
CTD-2541M15.1	-35.7662	23.575	-3.57984	0.000594256	0.0228419	-0.929096
PRR5L	-2480.8	2130.9	-3.57906	0.000595762	0.0228847	-0.931468
A1CF	-2065.91	1366.22	-3.57865	0.000596567	0.0229006	-0.932733
MYOT	-73.7879	19.3125	-3.56712	0.000619575	0.0237681	-0.968182
OSBPL1A	-1636.4	1007.3	-3.56629	0.000621253	0.0238169	-0.970716
STPG1	-490.455	471.938	-3.56496	0.000623963	0.0239051	-0.974792
CNTNAP3	-38.7706	14.35	-3.56219	0.00062967	0.0241079	-0.983318
MB	-322.926	126.85	-3.56145	0.000631182	0.02415	-0.985565
DIRAS1	-97.9697	37.0375	-3.56097	0.000632181	0.0241723	-0.987046
CTC-428G20.1	-6.65368	5.2625	-3.56005	0.000634076	0.0242289	-0.989849
RN7SL526P	-1.80087	0.6	-3.5581	0.000638143	0.0243684	-0.995835
CTD-3157E16.1	-92.368	51.7625	-3.55469	0.000645314	0.0246261	-1.0063
TRPC7	-24.6234	6.3	-3.55341	0.000648022	0.0247133	-1.01022
AFF3	-296.42	89.3625	-3.55213	0.000650726	0.0248002	-1.01412
GOLM1	-13597.1	12180.1	-3.55163	0.000651794	0.0248247	-1.01565
CYP3A4	-722.844	93.2625	-3.55084	0.000653477	0.0248616	-1.01807
IGLC2	-12222	4989	-3.55078	0.000653614	0.0248616	-1.01826
ARHGAP36	-9.55844	2.8	-3.54996	0.000655353	0.0249115	-1.02075
FCRL5	-395.195	176.625	-3.54946	0.000656438	0.0249365	-1.0223
MST1L	-82.7056	33.0625	-3.54889	0.000657649	0.0249663	-1.02402
GALNT12	-2846.22	2148.85	-3.54068	0.000675532	0.0256285	-1.04913
RP11-341G23.3	-13.4502	4.3875	-3.53843	0.000680507	0.0258005	-1.056
SLC27A2	-1662.63	1317.39	-3.53461	0.000689035	0.0260963	-1.06765
PRPH	-201.307	44.575	-3.53453	0.000689203	0.0260963	-1.06788
PRR33	-29.6623	14.45	-3.53358	0.000691343	0.0261604	-1.07078
LINC00934	-0.588745	0.1	-3.53269	0.00069336	0.0261797	-1.07351
PRR13P7	-0.588745	0.1	-3.53269	0.00069336	0.0261797	-1.07351
ABCD1P4	-0.588745	0.1	-3.53269	0.00069336	0.0261797	-1.07351
LINC01352	-7.93506	3.3625	-3.53256	0.000693648	0.0261797	-1.0739
RP11-386I14.2	-11.4416	7.9875	-3.53155	0.000695931	0.0262489	-1.07697
B3GNT5	-2134.57	1731.81	-3.53064	0.000698005	0.0263102	-1.07976
ASB7	-678.766	814.688	-3.5283	0.000703332	0.0264938	-1.08687
CDKL1	-116.169	81.1875	-3.52746	0.000705263	0.0265495	-1.08943
RP11-407G23.1	-1.44589	0.275	-3.52707	0.000706154	0.0265659	-1.09061
BCL2L15	-2831.7	1864.83	-3.52205	0.000717798	0.0269865	-1.10591
CTD-2562J17.7	-4.25541	2.2375	-3.52076	0.000720811	0.0270824	-1.10983
EPHA5	-15.5065	5.075	-3.52005	0.00072247	0.0271272	-1.11198
COX6A2	-1.15152	0.225	-3.51953	0.000723696	0.0271558	-1.11356
SMCHD1	-2830.03	2217.43	-3.51878	0.000725451	0.0272042	-1.11583
MGST3	-3543.76	4319.8	-3.51854	0.00072603	0.0272084	-1.11657
ABCA9	-179.619	60.45	-3.51621	0.000731545	0.0273975	-1.12365
MAF	-1331.59	860.675	-3.51531	0.000733695	0.0274604	-1.12639
LILRP2	-8.52381	3.4625	-3.5141	0.000736566	0.0275502	-1.13005
LGI4	-666.255	248.062	-3.51054	0.000745145	0.0278532	-1.14087
COX5A	-5187.49	5935.38	-3.5102	0.000745952	0.0278656	-1.14188
RP11-583F24.7	-0.922078	0.1125	-3.50884	0.000749247	0.0279708	-1.14601
ITGB7	-251.541	162.225	-3.50818	0.000750873	0.0280135	-1.14803
BSG	-36738.3	33305.4	-3.5049	0.000758906	0.0282952	-1.15798
PJA2	-3166.22	3473.85	-3.5038	0.000761618	0.0283782	-1.16131
SESN2	-1124.97	1043.89	-3.50229	0.000765342	0.0284987	-1.16587
RAB42	-133.883	77.1375	-3.50109	0.000768331	0.0285918	-1.16952
VAMP2	-1669.16	1621.76	-3.49997	0.000771112	0.028677	-1.17289
RAPGEFL1	-5892.32	4124.31	-3.49834	0.00077519	0.0288103	-1.17782
DOLPP1	-1161.19	1118.69	-3.4951	0.000783378	0.0290961	-1.18764
AQP11	-185.636	141.325	-3.49455	0.00078477	0.0291293	-1.1893
TMEM127	-4356.06	4979.29	-3.49345	0.000787577	0.0292149	-1.19264
ZSWIM6	-1037.56	945.35	-3.49135	0.000792949	0.0293955	-1.19899
IGKV1OR2-6	-68.974	18.6125	-3.49099	0.000793864	0.0294107	-1.20007
RP11-448G15.1	-9.57576	3.45	-3.48889	0.000799281	0.0295926	-1.20642
DNAJB4	-478.558	509.387	-3.48836	0.000800643	0.0296243	-1.20801
RP11-219E7.1	-9.1342	5.875	-3.48635	0.00080585	0.0297981	-1.21407
NEDD4L	-3140.97	3112.81	-3.48457	0.000810506	0.0299513	-1.21945
KIF5C	-129.528	66.6625	-3.48203	0.000817199	0.0301795	-1.22713
ELAVL4	-68.7922	21.7875	-3.47815	0.000827492	0.0305403	-1.23882
LINC01389	-77.0346	35.1875	-3.47791	0.000828128	0.0305445	-1.23954
NPY6R	-325.81	59.075	-3.47607	0.000833052	0.0307067	-1.24507
AC108004.3	-1.97835	0.7625	-3.47526	0.000835246	0.0307681	-1.24753
RP11-317M11.1	-2.84848	0.925	-3.47168	0.000844939	0.0311056	-1.2583
NCOA4	-6701.84	7707.81	-3.46881	0.000852802	0.0313753	-1.26695
PPM1A	-2373.27	2760.72	-3.46808	0.000854798	0.0314289	-1.26913
RP11-243M5.3	-1.94372	0.4625	-3.46706	0.000857613	0.0315126	-1.2722
IGHV3-74	-3489.23	767.95	-3.46649	0.00085918	0.0315503	-1.27391
CYBRD1	-3455.35	2225.22	-3.46367	0.000867017	0.0318181	-1.28238
IGHD6-25	-2.16017	0.5875	-3.46257	0.00087011	0.0318932	-1.28571
LCN8	-25.7446	3.8875	-3.46255	0.000870157	0.0318932	-1.28576
SLC5A7	-44.2035	9.7875	-3.46183	0.000872186	0.0319475	-1.28793
RP11-131H24.4	-10.8528	3.8875	-3.4603	0.00087649	0.032085	-1.29253
MAGEE2	-6.09524	1.8	-3.46003	0.000877242	0.0320924	-1.29333
PHOX2B	-53.7749	10.575	-3.458	0.00088298	0.0322821	-1.29941
RP13-497K6.1	-42.2511	7	-3.45709	0.000885567	0.0323538	-1.30214
LINC01537	-10.9697	4.775	-3.45692	0.000886049	0.0323538	-1.30265
IGHV3-15	-4091.01	1329.4	-3.45621	0.000888089	0.032408	-1.3048
PDXP	-77.3896	58.5125	-3.45583	0.000889163	0.0324269	-1.30592
DPEP2	-120.169	65.3375	-3.45165	0.000901182	0.0328448	-1.31845
FLJ22763	-333.476	164.363	-3.44372	0.00092442	0.0336707	-1.34221
AKR1B15	-37.4026	12	-3.44276	0.000927282	0.0337539	-1.34509
UNC5B	-3168.45	2021.36	-3.44099	0.000932571	0.0339252	-1.35039
C1QTNF2	-82.2035	55.2125	-3.44022	0.000934851	0.033987	-1.35267
WASL	-4389.31	4469.29	-3.42866	0.000970104	0.0352379	-1.38719
IGKV3-7	-179.719	56.6875	-3.42855	0.000970465	0.0352379	-1.38754
OGN	-933.108	248.55	-3.42825	0.000971394	0.0352497	-1.38843
RP11-844P9.2	-53.0736	19.25	-3.42212	0.0009906	0.0359243	-1.40668
ACTL6B	-5.87879	1.675	-3.42048	0.000995809	0.0360908	-1.41157
SDPR	-1301.72	491.425	-3.41833	0.00100267	0.036308	-1.41797
HCG23	-4.01732	1.8	-3.41822	0.00100304	0.036308	-1.41832
RP11-605F20.1	-0.627706	0.0625	-3.41688	0.00100735	0.0364411	-1.42231
RP11-347H15.5	-1.98268	0.425	-3.41338	0.00101863	0.0368266	-1.43269
ECI2	-1749.93	1278.36	-3.41274	0.00102072	0.0368791	-1.43459
ATP1A2	-662.502	151.675	-3.41051	0.00102803	0.0371204	-1.44125
IGHD1-26	-0.87013	0.1625	-3.40298	0.00105296	0.0379737	-1.46357
IGKV2OR2-10	-0.87013	0.1625	-3.40298	0.00105296	0.0379737	-1.46357
LINC01513	-1.08658	0.2875	-3.40236	0.00105504	0.0380018	-1.46541
RP4-710M16.1	-1.08658	0.2875	-3.40236	0.00105504	0.0380018	-1.46541
AC006007.1	-1.79221	0.275	-3.40171	0.00105724	0.0380573	-1.46734
SSTR1	-516.121	249.9	-3.39982	0.00106364	0.038264	-1.47296
CYP26B1	-305.576	117.55	-3.39762	0.00107109	0.0385083	-1.47947
RP11-517I3.2	-46.4502	39.625	-3.39658	0.00107465	0.0386127	-1.48256
RP11-211N11.5	-23.6494	14.2375	-3.39577	0.00107742	0.0386886	-1.48496
RP5-1031D4.3	-9.84416	5.525	-3.39557	0.0010781	0.0386889	-1.48554
FAM162A	-2963.28	2907.18	-3.39479	0.00108079	0.0387617	-1.48786
PCDH11Y	-2.54545	0.55	-3.39396	0.00108365	0.0388403	-1.49032
SDHD	-2983.77	3628.79	-3.38838	0.00110303	0.0395108	-1.50683
ACER3	-982.242	1236.92	-3.38716	0.00110732	0.0395938	-1.51044
ETF1P3	-1.36797	0.35	-3.38715	0.00110735	0.0395938	-1.51047
RP11-182J1.1	-5.09524	1.7625	-3.38714	0.00110738	0.0395938	-1.5105
CAB39	-3835.07	5191.41	-3.3833	0.00112096	0.0400549	-1.52184
AXDND1	-431.32	149.188	-3.38238	0.00112423	0.0401472	-1.52455
IGHV7-27	-12.0736	3.7125	-3.38188	0.001126	0.0401857	-1.52602
CTD-3157E16.2	-137.784	88.05	-3.3815	0.00112737	0.04021	-1.52715
PKNOX2	-72.5368	29.85	-3.38067	0.00113034	0.0402913	-1.5296
RP11-430C7.5	-19.9827	11.1	-3.3804	0.00113132	0.0403015	-1.5304
RP11-305L7.6	-25.6753	5.2875	-3.37751	0.00114171	0.0406469	-1.53891
PIK3CG	-276.281	154.412	-3.37559	0.0011487	0.0408709	-1.54459
SERINC2	-13833.1	10510	-3.37395	0.00115466	0.041058	-1.54941
RP11-215E13.1	-1.94372	0.4625	-3.37341	0.00115664	0.0411033	-1.551
IGKV1-22	-1.19048	0.1875	-3.37226	0.00116088	0.041229	-1.55441
HOXD1	-72.1126	24.925	-3.37045	0.00116752	0.0414395	-1.55971
LINC00964	-12.4242	4.375	-3.36989	0.0011696	0.0414882	-1.56137
NRG4	-55.5671	21.85	-3.36937	0.00117153	0.0415315	-1.56291
AC073316.2	-0.844156	0.1875	-3.36713	0.00117988	0.0418019	-1.56951
CTD-2184C24.2	-11.9654	7.15	-3.36366	0.0011929	0.0422376	-1.57972
ACACB	-1514.6	1022.2	-3.36247	0.00119739	0.0423711	-1.58322
ALOX15B	-333.701	88.8125	-3.36136	0.0012016	0.042494	-1.58648
CMTM5	-13.7359	3.1125	-3.3605	0.00120484	0.0425719	-1.58899
AC114498.1	-32.2987	11.9125	-3.3604	0.00120526	0.0425719	-1.58931
C11orf54	-1687.48	1774.46	-3.35847	0.0012126	0.0428053	-1.59495
GLOD5	-105.714	69.25	-3.3558	0.00122287	0.0431418	-1.6028
CNTN3	-356.385	104.312	-3.35491	0.00122634	0.0432379	-1.60543
MYO15B	-10120	6534.85	-3.34663	0.00125878	0.0443325	-1.62971
IGKV2-4	-6.74459	2.175	-3.3466	0.0012589	0.0443325	-1.62979
LRRC31	-1265.77	684.7	-3.34623	0.00126034	0.0443565	-1.63086
FRRS1	-360	196.5	-3.34463	0.00126671	0.0445537	-1.63554
PLXNA2	-3667.39	3047.14	-3.34177	0.0012782	0.0449308	-1.64393
IGHV3-62	-46.6407	10.775	-3.34106	0.00128104	0.0450036	-1.646
GAPT	-74.8485	36.625	-3.34021	0.00128447	0.0450969	-1.64848
RP11-10N16.2	-5.63636	2.575	-3.33984	0.00128597	0.0451203	-1.64957
RP4-568B10.1	-5.04762	2.475	-3.33967	0.00128668	0.0451203	-1.65008
CCL14	-86.1255	37.4375	-3.33615	0.00130097	0.0455942	-1.66035
RP11-770E5.1	-3.77489	1.7	-3.33457	0.00130746	0.045794	-1.66497
MAST3	-1175.37	1093.04	-3.33392	0.00131014	0.0458604	-1.66687
CTNNA3	-61.355	20.6125	-3.33081	0.00132301	0.0462833	-1.67596
TRGV2	-3.64935	1.4875	-3.32948	0.00132857	0.0464499	-1.67985
RNF103	-1936.55	2207.4	-3.32837	0.00133319	0.0465798	-1.68308
SLC8A3	-19.8312	8.9125	-3.3282	0.00133388	0.0465798	-1.68356
CRAT	-3066.02	2288.62	-3.32797	0.00133486	0.046586	-1.68424
AF131217.1	-26.3463	8.975	-3.32558	0.0013449	0.0469084	-1.6912
RLN3	-0.601732	0.0875	-3.32102	0.00136429	0.0475564	-1.7045
IL10RB	-2023.11	2234.43	-3.32001	0.00136863	0.0476792	-1.70745
CYB561A3	-1318.55	1544.56	-3.31892	0.00137331	0.0478135	-1.71061
IGHV1OR15-3	-3.28571	0.8375	-3.31734	0.00138015	0.048011	-1.71523
GNG2	-558.571	429.375	-3.31723	0.00138062	0.048011	-1.71555
RP11-788H18.1	-0.883117	0.15	-3.31673	0.00138277	0.0480571	-1.71699
IGHVIII-67-2	-5.7316	1.15	-3.31607	0.00138564	0.0481282	-1.71892
IGLV8OR8-1	-8.93074	1.7375	-3.31461	0.00139197	0.0483194	-1.72315
FGF14-AS2	-27.7056	14	-3.31442	0.00139283	0.0483203	-1.72372
VILL	-5178.35	2743.18	-3.31078	0.00140876	0.0488441	-1.73428
IGKV2OR2-2	-2.27706	0.475	-3.30901	0.0014166	0.049068	-1.73943
TRIM36	-709.078	420.512	-3.30894	0.0014169	0.049068	-1.73963
IGKC	-122870	48114.9	-3.3061	0.00142955	0.0494767	-1.74788
TMEM59L	-91.0303	26.05	-3.30563	0.00143167	0.0495206	-1.74925

## Sheet: total
Tag	logFC	AveExpr	t	P.Value	adj.P.Val	B
BMP3	-3820.25	327.531	-34.0876	1.36322e-97	7.95943e-93	211.534
VSTM2A	-285.519	24.4885	-33.3383	1.47137e-95	4.29545e-91	206.926
PKIB	-6577.09	787.15	-32.425	4.84401e-93	9.42758e-89	201.217
SLC4A4	-14993.9	1442.79	-31.3425	5.31311e-90	7.75541e-86	194.316
LINC00974	-76.8719	7.04615	-30.3605	3.44178e-87	4.01911e-83	187.93
SCARA5	-4567.97	455.385	-29.9127	6.8557e-86	6.67139e-82	184.977
CA1	-53817.3	3692.98	-29.8819	8.43022e-86	7.03165e-82	184.773
BEST4	-4809.08	347.115	-29.5149	9.98216e-85	7.28535e-81	182.333
OTOP2	-5684.8	358.719	-29.1888	9.10285e-84	5.90543e-80	180.15
CHP2	-18986	2153.63	-28.542	7.58867e-82	4.4308e-78	175.78
CA2	-68781.1	6058.15	-28.0909	1.71276e-80	9.0912e-77	172.7
CA7	-5837.62	407.988	-27.8898	6.92563e-80	3.36972e-76	171.318
IL6R	-3892.98	789.404	-27.614	4.74808e-79	2.13251e-75	169.415
C2orf88	-4953.05	677.819	-27.5243	8.89478e-79	3.70957e-75	168.794
CDKN2B	-7306.91	1175.24	-27.2277	7.14752e-78	2.78215e-74	166.734
TMEM236	-5513.98	801.719	-27.2182	7.64651e-78	2.79036e-74	166.667
CLDN23	-7749.7	1137.58	-26.9291	5.89189e-77	2.02359e-73	164.647
CLEC3B	-2028.33	248.554	-26.6404	4.57808e-76	1.485e-72	162.619
ADAMDEC1	-14606.6	1895.64	-26.5519	8.59859e-76	2.64235e-72	161.995
HPSE2	-308.697	44.05	-26.1125	1.99566e-74	5.82602e-71	158.883
CA4	-22601.4	1846.9	-25.9178	8.1073e-74	2.2541e-70	157.496
LDHD	-3922.72	657.369	-25.4704	2.06545e-72	5.48162e-69	154.291
GCNT2	-1235.32	165.762	-25.3681	4.34513e-72	1.10304e-68	153.554
SLC51B	-3852.82	458.773	-25.3498	4.96229e-72	1.20722e-68	153.423
GFRA2	-397.144	52.1077	-25.2218	1.26178e-71	2.94686e-68	152.499
PYY	-4257.73	298.531	-25.1593	1.99056e-71	4.4701e-68	152.047
ENPP6	-121.556	18.3615	-25.1209	2.63566e-71	5.69957e-68	151.769
SCGN	-726.935	70.8615	-24.9301	1.06522e-70	2.22125e-67	150.386
RNF152	-2330.29	427.738	-24.8724	1.6262e-70	3.27411e-67	149.967
SLC17A4	-2569.8	384.908	-24.7646	3.58985e-70	6.98669e-67	149.183
TRPM6	-6500.72	788.262	-24.7318	4.56794e-70	8.60348e-67	148.944
RP11-396O20.2	-513.518	49.9577	-24.5554	1.6753e-69	3.05675e-66	147.657
GLP2R	-555.734	74.9654	-24.3759	6.30718e-69	1.11593e-65	146.344
PHLPP2	-5675.06	1278.99	-24.3474	7.78662e-69	1.33717e-65	146.135
GUCA2A	-30470.5	2442.24	-24.2375	1.75793e-68	2.93259e-65	145.328
SLC17A7	-97.9959	18.0346	-24.1907	2.48728e-68	4.03403e-65	144.985
CTNND2	-102.44	14.1769	-24.0159	9.11806e-68	1.43885e-64	143.697
CDKN2B-AS1	-2330.05	194.404	-23.8057	4.36848e-67	6.71217e-64	142.145
RP11-1090M7.1	-53.3975	6.13846	-23.7574	6.26717e-67	9.38259e-64	141.787
TINCR	-412.481	53.9654	-23.7093	8.98149e-67	1.31101e-63	141.431
SLC26A2	-97461.6	11962.6	-23.6352	1.56332e-66	2.22629e-63	140.881
TMIGD1	-7340.2	522.446	-23.5658	2.62921e-66	3.65504e-63	140.366
SLC26A3	-190248	19115.1	-23.5619	2.70754e-66	3.6764e-63	140.337
TEX11	-267.139	31.3	-23.4988	4.34654e-66	5.76776e-63	139.868
WSCD1	-2556.4	427.85	-23.397	9.33373e-66	1.21104e-62	139.11
TMEM72	-1184.55	128.285	-23.2918	2.05905e-65	2.61352e-62	138.326
AHCYL2	-24959.5	5083.53	-23.2764	2.31198e-65	2.85769e-62	138.211
ACADS	-10853.1	2666.37	-23.2743	2.34931e-65	2.85769e-62	138.196
AC106869.2	-46.623	5.74615	-23.1877	4.50865e-65	5.37238e-62	137.549
TMCC3	-5369.28	1408.82	-23.0388	1.38717e-64	1.61986e-61	136.435
NR3C2	-5851.42	1284.04	-22.9949	1.93263e-64	2.21255e-61	136.107
PLCL2	-1551.15	369.931	-22.82	7.26804e-64	8.16075e-61	134.793
CD163L1	-2276.09	368.662	-22.7916	9.01015e-64	9.78935e-61	134.58
ADH1C	-21346.1	2423.58	-22.791	9.05381e-64	9.78935e-61	134.576
ZG16	-50880.4	4671.38	-22.7042	1.74904e-63	1.85675e-60	133.923
METTL7A	-9976.1	2592.88	-22.6878	1.98179e-63	2.06627e-60	133.799
MS4A12	-17228.4	1406.96	-22.6816	2.0764e-63	2.12693e-60	133.753
ABCA8	-2001.69	227.619	-22.6696	2.27518e-63	2.29036e-60	133.662
UGP2	-15008.3	5618.57	-22.5479	5.73846e-63	5.62082e-60	132.745
DHRS7C	-22.8197	1.83462	-22.5471	5.7761e-63	5.62082e-60	132.738
SLC22A5	-3803.43	1271.37	-22.5015	8.17053e-63	7.82054e-60	132.394
EDN3	-3345.87	514.154	-22.4761	9.91959e-63	9.34153e-60	132.202
KLF4	-20153	4241.04	-22.3713	2.20538e-62	2.04389e-59	131.41
SCN9A	-865.515	141.935	-22.2342	6.28439e-62	5.73323e-59	130.371
PADI2	-28275.7	4457.66	-22.2215	6.9251e-62	6.22055e-59	130.275
KHDRBS2	-45.5994	4.51923	-22.2193	7.04256e-62	6.23021e-59	130.258
RP11-169K16.6	-141.581	27.5692	-22.1612	1.09835e-61	9.57154e-59	129.818
LRRC19	-6281.23	1397.87	-22.0297	3.00896e-61	2.58359e-58	128.818
DNASE1L3	-1242.98	171.135	-21.7549	2.48439e-60	2.10226e-57	126.725
CEACAM7	-148810	16164.9	-21.7455	2.67151e-60	2.22831e-57	126.652
USP2	-2417.03	255.338	-21.7141	3.40211e-60	2.79773e-57	126.413
ENTPD5	-15758.3	3839.36	-21.7105	3.49789e-60	2.83655e-57	126.385
MT1M	-2925.72	285.454	-21.5643	1.07917e-59	8.63145e-57	125.268
AC007182.6	-243.302	23.6077	-21.4783	2.09676e-59	1.65438e-56	124.609
ZNF575	-589.603	169.242	-21.4594	2.42701e-59	1.88941e-56	124.464
TNFRSF13B	-188.074	29	-21.3532	5.51563e-59	4.23738e-56	123.649
RN7SKP127	-49.9611	4.48846	-21.3431	5.9633e-59	4.50863e-56	123.572
HHLA2	-10242.4	2123.44	-21.3419	6.02314e-59	4.50863e-56	123.562
AMPD1	-257.121	29.8269	-21.2156	1.60166e-58	1.18375e-55	122.592
XXbac-B476C20.9	-354.018	93.3923	-21.1975	1.84265e-58	1.34483e-55	122.453
TMEM37	-6026.19	1039.9	-21.1639	2.3917e-58	1.724e-55	122.194
PLCD1	-3508.66	956.635	-21.094	4.11525e-58	2.93021e-55	121.656
SMPDL3A	-5256.79	1167.02	-21.0786	4.6367e-58	3.26172e-55	121.537
P2RX2	-51.8238	5.86538	-21.0685	5.01748e-58	3.48757e-55	121.459
LGI1	-102.624	9.75385	-21.0031	8.33915e-58	5.72821e-55	120.955
UGT1A10	-2763.39	384.415	-20.9909	9.16435e-58	6.22185e-55	120.861
PDCD4	-14524.8	5248.15	-20.9496	1.26393e-57	8.4824e-55	120.542
RETSAT	-17882	6033.21	-20.9145	1.66111e-57	1.10213e-54	120.271
CWH43	-2152.04	245.077	-20.8784	2.19987e-57	1.44319e-54	119.992
GPT	-4086.62	635.681	-20.8523	2.69523e-57	1.74852e-54	119.791
SLC22A18AS	-1569.77	397.646	-20.72	7.56207e-57	4.85194e-54	118.767
DHRS11	-9150.43	2102.49	-20.6972	9.03355e-57	5.73307e-54	118.591
TP53INP2	-11678	2811.75	-20.659	1.21735e-56	7.64272e-54	118.295
SLAMF6P1	-76.5113	12.6346	-20.5984	1.95296e-56	1.21306e-53	117.826
CNNM2	-2119.95	866.631	-20.4747	5.13892e-56	3.15838e-53	116.866
APPL2	-7917.62	3094.12	-20.3785	1.09163e-55	6.63927e-53	116.118
SLC30A10	-1374.79	100.623	-20.3468	1.39873e-55	8.41934e-53	115.872
ADHFE1	-154.538	36.0346	-20.2372	3.30532e-55	1.96926e-52	115.019
TMEM100	-448.116	69.5231	-20.1921	4.70744e-55	2.7763e-52	114.668
CHAT	-31.0748	2.9	-20.1789	5.2196e-55	3.04757e-52	114.565
CHGA	-14747.6	1336.02	-20.1567	6.21688e-55	3.56894e-52	114.392
P2RY1	-1802.68	462.815	-20.1563	6.23482e-55	3.56894e-52	114.389
GUCA2B	-5705.25	389.588	-20.1261	7.90453e-55	4.48079e-52	114.153
CADM3	-1147.47	129.704	-19.9022	4.59863e-54	2.58173e-51	112.406
SLC25A34	-1039.83	112.473	-19.8935	4.92626e-54	2.73933e-51	112.337
HSD17B2	-9493.7	1191.03	-19.8912	5.01665e-54	2.76328e-51	112.319
TSPAN7	-4659.21	1030.51	-19.7395	1.65862e-53	9.05063e-51	111.133
FUCA1	-10130.9	4118.64	-19.7066	2.14905e-53	1.16182e-50	110.875
HPGDS	-270.289	49.7192	-19.7012	2.24346e-53	1.20173e-50	110.833
ELANE	-31.6168	4.70385	-19.6938	2.37889e-53	1.26269e-50	110.775
TMEM151B	-62.3381	9.87308	-19.6577	3.16175e-53	1.65534e-50	110.492
RERGL	-160.161	17.7577	-19.6572	3.17532e-53	1.65534e-50	110.488
AVPR1B	-11.5256	1.49615	-19.6198	4.26636e-53	2.20442e-50	110.195
UGT1A8	-894.315	98.9077	-19.5671	6.47181e-53	3.31465e-50	109.781
PDE9A	-6608.78	1354.79	-19.5436	7.79054e-53	3.95536e-50	109.597
ADTRP	-6325.81	1003.9	-19.54	8.0133e-53	4.03338e-50	109.569
NR5A2	-2282.86	667.308	-19.5077	1.035e-52	5.16498e-50	109.315
LRRN2	-1839.95	278.031	-19.4332	1.86591e-52	9.23264e-50	108.73
RP11-35P15.1	-76.0492	10.8808	-19.4241	2.00507e-52	9.83781e-50	108.659
ETFDH	-2666.45	1030.7	-19.398	2.46527e-52	1.1995e-49	108.454
PEX26	-8880.76	3685.93	-19.3901	2.62491e-52	1.26662e-49	108.391
ITM2C	-96206.8	25080.2	-19.3623	3.26927e-52	1.56461e-49	108.173
SLC36A1	-4132.03	1445.94	-19.299	5.39778e-52	2.56228e-49	107.676
TUBAL3	-1806.66	370.335	-19.2513	7.87775e-52	3.70934e-49	107.3
RP11-747D18.1	-116.144	14.5654	-19.165	1.56239e-51	7.29786e-49	106.621
SEMA6D	-2762.54	515.338	-19.1601	1.62484e-51	7.52932e-49	106.582
SST	-750.808	57.2077	-19.1589	1.63927e-51	7.5364e-49	106.573
MALL	-2427.2	620.104	-19.1422	1.87144e-51	8.53655e-49	106.442
B3GALT1	-688.078	106.015	-19.0593	3.61682e-51	1.63702e-48	105.787
SPIB	-3007.53	312.735	-19.0566	3.69261e-51	1.65847e-48	105.767
RP1-117B12.4	-26.4334	5.38077	-19.0347	4.39721e-51	1.95984e-48	105.593
TAT	-131.303	15.7769	-18.9986	5.854e-51	2.58937e-48	105.309
HSD11B2	-25695.2	6819.57	-18.9247	1.05388e-50	4.62652e-48	104.726
NAAA	-5566.8	1724.78	-18.905	1.23196e-50	5.32903e-48	104.571
C15orf48	-23250.9	6078.58	-18.905	1.23216e-50	5.32903e-48	104.571
AL928768.3	-111.741	14.8231	-18.9018	1.26435e-50	5.42806e-48	104.545
TMEM82	-953.65	131.662	-18.8406	2.05769e-50	8.76951e-48	104.061
LINC00092	-37.4027	9.46154	-18.7726	3.53474e-50	1.49553e-47	103.524
PLAC8	-14818.2	2469.84	-18.7674	3.68467e-50	1.54775e-47	103.483
NAP1L2	-191.631	31.4115	-18.7652	3.74994e-50	1.56391e-47	103.466
RP11-671J11.4	-3.98361	0.511538	-18.7639	3.78784e-50	1.56851e-47	103.456
CTD-2385L22.2	-161.991	16.4154	-18.726	5.12396e-50	2.10685e-47	103.156
SLC25A23	-8761.09	3811.93	-18.6749	7.69804e-50	3.14312e-47	102.752
PPAP2A	-3253.11	1258.9	-18.5453	2.16311e-49	8.77068e-47	101.726
LGALS4	-172351	56683.4	-18.5262	2.51853e-49	1.01413e-46	101.575
LIFR	-1195.78	237.808	-18.5041	3.00452e-49	1.20154e-46	101.4
PAPSS2	-14352	4489.41	-18.49	3.36398e-49	1.33614e-46	101.287
MT1G	-15572.8	2060.97	-18.4087	6.43747e-49	2.53963e-46	100.643
EIF4E3	-2727.66	1069.76	-18.3868	7.66609e-49	3.00403e-46	100.47
CLCA4	-54859.7	4772.67	-18.3585	9.60731e-49	3.73961e-46	100.246
UGT2B17	-29177.6	2977.9	-18.3247	1.25845e-48	4.86605e-46	99.9775
NKX2-3	-1008.66	205.596	-18.3216	1.2901e-48	4.9556e-46	99.9529
IGJ	-178293	22610.5	-18.3049	1.47443e-48	5.62665e-46	99.8203
MAMDC2	-1338.85	151.227	-18.2123	3.09109e-48	1.17195e-45	99.0853
RP11-317J10.2	-97.6814	19.1423	-18.2026	3.34116e-48	1.25858e-45	99.0081
FGL2	-4763.41	1151.72	-18.18	4.00409e-48	1.49863e-45	98.8283
AC073283.4	-211.875	63.2885	-18.1715	4.28353e-48	1.59301e-45	98.7614
SPPL2A	-6167.17	3113.78	-18.1589	4.73782e-48	1.75081e-45	98.6613
RDH5	-378.323	111.896	-18.1051	7.29204e-48	2.67774e-45	98.2331
RXRG	-89.6004	11.7885	-18.0896	8.25392e-48	3.01201e-45	98.1101
SH2D7	-303.97	36.6731	-18.0552	1.0872e-47	3.94274e-45	97.8366
SCNN1B	-6306.12	696.135	-18.0502	1.13092e-47	4.076e-45	97.7974
HIGD1A	-6068.33	2871.48	-18.0261	1.37154e-47	4.91288e-45	97.6059
SGK1	-16466	2724.2	-18.0142	1.50919e-47	5.37299e-45	97.5109
SLC51A	-4347.82	440.992	-17.9742	2.079e-47	7.35676e-45	97.1929
RP11-135D11.2	-5.5123	0.576923	-17.9605	2.32014e-47	8.16061e-45	97.0839
MT1F	-3473.97	549.127	-17.958	2.36624e-47	8.27293e-45	97.0644
GNG7	-709.707	167.092	-17.9284	2.99973e-47	1.04253e-44	96.8288
RP4-659I19.1	-13.4713	1.60769	-17.9229	3.13593e-47	1.08342e-44	96.7847
KCNE2	-28.4631	6.03846	-17.909	3.50433e-47	1.20357e-44	96.6744
RMDN2	-705.742	285.688	-17.8695	4.80961e-47	1.64221e-44	96.3601
UNC5C	-594.401	162.115	-17.8625	5.08976e-47	1.72777e-44	96.3038
TLR3	-1595.18	517.108	-17.83	6.60514e-47	2.22922e-44	96.0451
MOGAT2	-7318.36	1240	-17.81	7.74957e-47	2.60043e-44	95.8864
PCSK2	-312.014	26.5615	-17.7765	1.0142e-46	3.38378e-44	95.6192
PDK4	-7430.42	1399.96	-17.7308	1.4632e-46	4.85408e-44	95.2553
GNA11	-17112.4	6849.19	-17.7119	1.70334e-46	5.61882e-44	95.1044
GPR15	-543.891	72.4538	-17.6888	2.04922e-46	6.7218e-44	94.9208
ETHE1	-15607.9	5936.7	-17.6609	2.56351e-46	8.36176e-44	94.6985
SDCBP2	-12299.4	3032.15	-17.6521	2.75069e-46	8.92246e-44	94.6285
PLCE1	-4365.47	1564.55	-17.6445	2.92424e-46	9.43303e-44	94.5678
LINC00682	-13.4672	1.61154	-17.6401	3.029e-46	9.71726e-44	94.5328
ACKR2	-204.097	48.65	-17.6383	3.07237e-46	9.80255e-44	94.5187
BEST2	-1476.73	189.204	-17.6318	3.2376e-46	1.02736e-43	94.4667
OR2S1P	-42.9273	10.5269	-17.6146	3.71717e-46	1.17316e-43	94.3295
ARHGAP20	-222.166	52.6308	-17.5501	6.24049e-46	1.95894e-43	93.8151
DMRTA1	-126.073	18.8731	-17.548	6.34655e-46	1.97786e-43	93.7983
SULT1A2	-1188.52	127.935	-17.5476	6.36849e-46	1.97786e-43	93.7949
EPB41L3	-4615.86	976.877	-17.5377	6.8914e-46	2.12893e-43	93.7165
LYPD8	-20146.5	2489.47	-17.5367	6.94658e-46	2.13468e-43	93.7086
MT1JP	-11.8115	1.41538	-17.512	8.4735e-46	2.59027e-43	93.5113
SGCG	-43.7613	5.36923	-17.5095	8.64706e-46	2.62956e-43	93.4912
LILRB5	-711.345	164.742	-17.5047	8.9885e-46	2.71923e-43	93.4527
RNU6-140P	-19.5943	3.61154	-17.4883	1.02488e-45	3.08451e-43	93.3224
SECTM1	-9324.71	1644.62	-17.4836	1.06442e-45	3.18709e-43	93.2848
GRAMD3	-2178.35	1094.64	-17.4082	1.95116e-45	5.81238e-43	92.6831
ENDOD1	-5562.66	2602.09	-17.3828	2.39224e-45	7.09013e-43	92.4807
TNFRSF17	-541.99	88.7385	-17.3802	2.44269e-45	7.2031e-43	92.46
FAM135B	-134.546	15.7962	-17.3701	2.65105e-45	7.77822e-43	92.3787
RP11-640L9.2	-102.715	24.7308	-17.2984	4.71456e-45	1.37635e-42	91.807
RP11-467J12.4	-42.2469	6.41538	-17.2257	8.46112e-45	2.45781e-42	91.2263
MIER3	-5128.42	2063.8	-17.2101	9.59279e-45	2.77274e-42	91.1016
ABCC13	-410.935	66.1654	-17.205	9.99444e-45	2.87461e-42	91.0609
DAO	-194.002	15.5615	-17.2036	1.01114e-44	2.89399e-42	91.0494
LPAR1	-1318.51	450.754	-17.1851	1.17314e-44	3.34126e-42	90.9018
FAM47E-STBD1	-268.14	99.6731	-17.1623	1.40894e-44	3.9934e-42	90.7199
RP1-35C21.1	-69.0215	6.78846	-17.0811	2.70947e-44	7.6424e-42	90.0706
PCK1	-16584.7	3110.06	-17.0542	3.36422e-44	9.44359e-42	89.8556
CD177	-32070.8	2572.71	-17.0222	4.35314e-44	1.21611e-41	89.5997
C4orf19	-2193.31	870.535	-17.0179	4.50492e-44	1.25252e-41	89.5657
ZZEF1	-8849.8	3762.62	-17.0133	4.67541e-44	1.29376e-41	89.5288
ZNF536	-141.908	24.7	-16.9977	5.30271e-44	1.46042e-41	89.4038
GREM2	-2463.96	338.608	-16.9912	5.58606e-44	1.53123e-41	89.3521
PTPRH	-7985.9	2465.85	-16.9819	6.02093e-44	1.64273e-41	89.2776
CA12	-24334.3	6431.12	-16.9269	9.37548e-44	2.54607e-41	88.8379
RP11-2I17.4	-24.1701	4.44231	-16.9224	9.71954e-44	2.62729e-41	88.8021
MXI1	-4266.75	2208.38	-16.9028	1.13771e-43	3.06119e-41	88.6457
TDP2	-12703	4902.88	-16.8853	1.30992e-43	3.50836e-41	88.5057
TMEM220-AS1	-152.541	33.5962	-16.8803	1.36438e-43	3.636e-41	88.4653
CLDN8	-2527.56	215.546	-16.8798	1.37003e-43	3.636e-41	88.4612
PDE6A	-526.155	82.9115	-16.849	1.7549e-43	4.63636e-41	88.2153
AQP8	-73068.4	4986.37	-16.8298	2.04977e-43	5.39098e-41	88.0611
ZBTB7B	-8440.04	4142.53	-16.8058	2.48505e-43	6.50648e-41	87.8699
PKNOX2	-143.87	34.0462	-16.7646	3.46375e-43	9.02849e-41	87.5401
GDPD2	-1487.63	191.477	-16.754	3.77351e-43	9.79217e-41	87.4551
AOC1	-35660	11087	-16.7454	4.04426e-43	1.04483e-40	87.3862
RP4-811M8.1	-49.251	6.09231	-16.7096	5.39701e-43	1.38817e-40	87.0997
FAM107A	-1274.3	216.927	-16.687	6.47604e-43	1.65841e-40	86.9187
TNXB	-6305.32	826.45	-16.6678	7.55731e-43	1.92685e-40	86.7654
CHP1	-15482.8	7229.98	-16.608	1.22349e-42	3.10591e-40	86.2869
FEV	-127.938	13.6231	-16.5898	1.41758e-42	3.58303e-40	86.1407
AC079776.2	-4.8873	0.788462	-16.5841	1.48423e-42	3.73533e-40	86.0951
TTC22	-3700.47	1524.82	-16.5722	1.63286e-42	4.09174e-40	86.0003
CDC14A	-963.202	365.385	-16.5445	2.04147e-42	5.09382e-40	85.7785
LAMA1	-707.938	157.815	-16.5435	2.05908e-42	5.11591e-40	85.77
PAQR5	-3190.71	1080.21	-16.5413	2.09528e-42	5.18377e-40	85.7527
ENHO	-112.875	25.6962	-16.5206	2.47505e-42	6.0975e-40	85.5873
RP11-202A13.1	-25.0891	3.14231	-16.5198	2.49264e-42	6.11502e-40	85.5803
TEF	-2229.51	935.062	-16.4648	3.88131e-42	9.48192e-40	85.1405
IGHA2	-341679	41461.7	-16.4643	3.89951e-42	9.48671e-40	85.1359
MUSK	-82.5379	12.8538	-16.4561	4.16318e-42	1.00861e-39	85.0709
CFD	-5206.26	1005.32	-16.4421	4.66338e-42	1.12513e-39	84.9582
SULT1B1	-16764.2	3984.02	-16.4352	4.92909e-42	1.18434e-39	84.9032
TMEM171	-3392.45	867.75	-16.4339	4.98156e-42	1.19204e-39	84.8927
MMP28	-2388.85	467.715	-16.4012	6.48352e-42	1.54511e-39	84.631
MT1X	-3664.18	1045.81	-16.3882	7.20133e-42	1.7092e-39	84.5267
CBLN2	-95.7029	19.8115	-16.3837	7.46786e-42	1.76529e-39	84.4906
RP11-319C21.1	-4.39344	0.376923	-16.3704	8.31111e-42	1.95206e-39	84.3844
SEMA6A	-5666.15	1600.48	-16.3702	8.32485e-42	1.95206e-39	84.3827
CHAD	-393.649	76.1385	-16.3656	8.64224e-42	2.01838e-39	84.3456
CITED2	-2985	1321.94	-16.3611	8.9595e-42	2.08414e-39	84.3098
RP11-356O9.2	-96.5768	13.0538	-16.3569	9.2694e-42	2.14767e-39	84.276
ANK3	-3054.66	1373.88	-16.3514	9.68958e-42	2.23615e-39	84.232
RILP	-1232.68	486.238	-16.3357	1.09955e-41	2.52753e-39	84.1064
RP11-467L13.4	-34.8074	3.33462	-16.3335	1.11938e-41	2.56302e-39	84.0887
BMP2	-2993.47	893.496	-16.2887	1.60649e-41	3.66399e-39	83.7299
AC074363.1	-15.4939	2.58462	-16.2809	1.71119e-41	3.8876e-39	83.6672
PHGR1	-30211.1	5950.68	-16.2699	1.86879e-41	4.22918e-39	83.5797
PINK1	-2214.4	1140.8	-16.2545	2.11608e-41	4.77033e-39	83.4563
NEU4	-2338.54	525.562	-16.2531	2.14087e-41	4.80765e-39	83.4447
CTC-428G20.6	-31.541	13.4	-16.222	2.75e-41	6.1519e-39	83.1961
P2RX1	-404.643	107.008	-16.2008	3.26269e-41	7.27095e-39	83.0263
GLTP	-3555.94	1944.32	-16.1705	4.16792e-41	9.25295e-39	82.7832
AC144831.1	-133.444	37.8308	-16.1662	4.31491e-41	9.54298e-39	82.7487
MIR22HG	-1533.8	564.838	-16.1637	4.40358e-41	9.70233e-39	82.7285
TMEFF2	-49.6762	6.63077	-16.1482	4.98793e-41	1.09485e-38	82.6048
AGPAT9	-1711.3	434.073	-16.1365	5.48168e-41	1.19872e-38	82.5111
ANO5	-599.576	102.696	-16.126	5.96938e-41	1.3005e-38	82.4264
PRKG2	-951.892	108.623	-16.1165	6.44171e-41	1.39819e-38	82.3508
ACOX1	-12089.1	5549.94	-16.1026	7.20597e-41	1.55828e-38	82.2395
CNGB1	-42.5184	6.22308	-16.064	9.84086e-41	2.12022e-38	81.93
LINC00675	-2536.57	995.335	-16.0631	9.9147e-41	2.12827e-38	81.9226
VSIG2	-7677.67	1420.42	-16.0616	1.00318e-40	2.14553e-38	81.9109
GSN	-44043.8	16395	-16.0594	1.02087e-40	2.17537e-38	81.8936
SMIM14	-7597.23	3462.11	-16.0504	1.09776e-40	2.33072e-38	81.8215
UGT2B15	-1834.74	245.419	-16.0226	1.37403e-40	2.90672e-38	81.5985
PRIMA1	-965.484	109.931	-16.0108	1.5107e-40	3.17771e-38	81.5044
UBE2FP1	-71.8555	28.7538	-16.0107	1.51301e-40	3.17771e-38	81.5029
HAPLN1	-543.985	132.054	-16	1.64872e-40	3.45032e-38	81.4176
CNNM4	-9644.43	4214.32	-15.9943	1.727e-40	3.60122e-38	81.3715
RUNDC3B	-482.728	115.915	-15.9918	1.76197e-40	3.66108e-38	81.3516
BCAS1	-9517.77	2371.75	-15.948	2.50737e-40	5.1914e-38	81.0012
STMN4	-63.6107	7.80385	-15.9159	3.24852e-40	6.70217e-38	80.7441
ABHD3	-4861.37	1766.42	-15.8931	3.90407e-40	8.02629e-38	80.5615
SRI	-18117.2	8186.69	-15.8875	4.08706e-40	8.37301e-38	80.516
C1orf115	-7510.31	1798.49	-15.8769	4.4523e-40	9.08939e-38	80.431
ENAM	-57.1465	10.3077	-15.8211	6.97976e-40	1.41996e-37	79.9846
SCIN	-5200.17	1027.22	-15.7842	9.39815e-40	1.90531e-37	79.6892
HMGCLL1	-31.7049	6.74615	-15.7797	9.75242e-40	1.97029e-37	79.6524
TRANK1	-5674.68	1915.97	-15.7698	1.05585e-39	2.1258e-37	79.5735
ADCY9	-2717.54	1321.13	-15.7432	1.30914e-39	2.62669e-37	79.36
MAL	-240.284	33.5654	-15.7412	1.33005e-39	2.6595e-37	79.3443
B4GALT1-AS1	-103.129	46.0923	-15.7249	1.51736e-39	3.02369e-37	79.2134
SULT1A1	-3941.81	1113.88	-15.7096	1.71626e-39	3.40841e-37	79.0911
ASAP3	-1650.1	620.573	-15.6958	1.91819e-39	3.79651e-37	78.9807
FAM180B	-45.7879	4.84231	-15.659	2.58006e-39	5.08926e-37	78.6863
ISX	-4828.72	1347.5	-15.6398	3.01292e-39	5.92308e-37	78.5323
P2RX4	-3550.02	1817.76	-15.6292	3.28166e-39	6.42975e-37	78.4474
C10orf54	-5027.98	1847.43	-15.626	3.36744e-39	6.57575e-37	78.4218
SSTR2	-216.045	59.75	-15.6065	3.94029e-39	7.66873e-37	78.2658
C1orf177	-42.835	11.2385	-15.5932	4.38641e-39	8.50862e-37	78.1593
PXMP2	-1564.51	744.142	-15.5861	4.64482e-39	8.98003e-37	78.1025
CASR	-27.6619	3.66538	-15.5813	4.83103e-39	9.30923e-37	78.0634
CLEC9A	-50.8893	10.4923	-15.5438	6.5365e-39	1.25542e-36	77.7632
PTGER4	-3000.33	1178.18	-15.5299	7.30993e-39	1.39936e-36	77.6522
CASP7	-7554	3498.23	-15.5196	7.9428e-39	1.51554e-36	77.5697
CTC-297N7.9	-54.8648	9.01154	-15.4731	1.15543e-38	2.19747e-36	77.1975
CES3	-8399.26	2225.99	-15.4713	1.17304e-38	2.2214e-36	77.1825
ARL14	-2219.27	533.554	-15.471	1.17562e-38	2.2214e-36	77.1803
RP13-672B3.2	-8.79098	2	-15.4623	1.26081e-38	2.37467e-36	77.1109
RP11-17M24.1	-7.91598	0.946154	-15.4478	1.41678e-38	2.65986e-36	76.995
AC009133.17	-21.627	4.95385	-15.4292	1.64601e-38	3.08031e-36	76.8461
LRRC3B	-10.8893	1.78077	-15.4045	2.01023e-38	3.74988e-36	76.6476
PBLD	-5321.04	1397.34	-15.4011	2.06541e-38	3.84055e-36	76.6207
GPA33	-35438	12157.2	-15.3978	2.1217e-38	3.93269e-36	76.594
LINC01082	-123.838	30.1577	-15.3904	2.25083e-38	4.15883e-36	76.5354
RP11-296E3.2	-38.833	12.6192	-15.3652	2.75834e-38	5.08048e-36	76.3335
ZBTB7C	-3935.05	988.104	-15.3603	2.8691e-38	5.26786e-36	76.2944
LINC00507	-20.0902	2.39615	-15.35	3.11705e-38	5.70518e-36	76.2121
HPGD	-8502.96	1941.74	-15.3474	3.18405e-38	5.8096e-36	76.1909
PLAC9	-356.181	103.3	-15.3228	3.88332e-38	7.06341e-36	75.9938
PTPN21	-1484.58	838.588	-15.3185	4.0181e-38	7.28586e-36	75.9599
CLIC5	-8046.52	2903.15	-15.2859	5.22686e-38	9.44832e-36	75.6988
SPOCK3	-50.7551	6.43077	-15.2828	5.36088e-38	9.66068e-36	75.6736
RP11-1151B14.4	-5.11885	0.946154	-15.2686	6.00914e-38	1.07956e-35	75.5603
TUBB4A	-176.547	25.6923	-15.2639	6.2432e-38	1.11816e-35	75.5223
MT1E	-7998.38	1689.95	-15.2624	6.31846e-38	1.12818e-35	75.5104
EDIL3	-3432.61	1278.69	-15.2469	7.15955e-38	1.27447e-35	75.3863
KIAA0513	-2384.24	843.423	-15.232	8.07269e-38	1.43265e-35	75.2671
PIRT	-220.331	31.9154	-15.2273	8.38014e-38	1.4827e-35	75.23
WDR78	-638.175	196.535	-15.1497	1.56655e-37	2.76333e-35	74.6088
SCN11A	-95.7766	16.9923	-15.14	1.69335e-37	2.97801e-35	74.5315
ACAA2	-13268.1	5862.47	-15.1173	2.03416e-37	3.56661e-35	74.3494
CTD-2269F5.1	-32.0523	9.35769	-15.1121	2.12048e-37	3.70684e-35	74.3082
PTGDR2	-506.404	87.3846	-15.0977	2.38135e-37	4.15044e-35	74.193
CNTN4	-547.175	148.185	-15.0886	2.56158e-37	4.45128e-35	74.1205
RP11-677M14.3	-118.061	39.9538	-15.0873	2.58875e-37	4.48515e-35	74.11
C1orf210	-2480.2	1187.24	-15.0745	2.87161e-37	4.9605e-35	74.0071
CNR1	-329.804	50.5538	-15.0572	3.2997e-37	5.68317e-35	73.8691
GSTM5	-296.553	71.1962	-15.0438	3.67502e-37	6.31099e-35	73.7621
PHOX2B	-99.875	12.1462	-15.0287	4.15196e-37	7.1091e-35	73.641
CES2	-41820.2	12009.8	-15.0087	4.87476e-37	8.3223e-35	73.4816
LYVE1	-1790.53	255.715	-14.9984	5.29735e-37	9.01739e-35	73.3991
DSC2	-12066.7	5690.69	-14.9916	5.59555e-37	9.49731e-35	73.3447
HTR3E	-86.5236	11.2385	-14.981	6.09728e-37	1.03189e-34	73.2594
UGDH	-9117.19	3921.99	-14.9711	6.601e-37	1.11391e-34	73.1806
SLC25A47P1	-11.4344	1.01923	-14.9536	7.59825e-37	1.2785e-34	73.0409
PPP2R3A	-1100.71	445.838	-14.9193	1.00143e-36	1.68018e-34	72.7668
AC144831.3	-55.4631	16.95	-14.914	1.04528e-36	1.74872e-34	72.7242
PIANP	-107.723	30.5308	-14.9064	1.11108e-36	1.8535e-34	72.6636
SLC25A20	-1985.47	1022.15	-14.9013	1.15812e-36	1.92646e-34	72.6224
TPH1	-434.289	63.3115	-14.8822	1.35049e-36	2.24008e-34	72.4698
CTB-118N6.2	-11.2357	2.58077	-14.8716	1.47046e-36	2.43217e-34	72.3853
BMP6	-317.585	91.6462	-14.8589	1.62812e-36	2.68535e-34	72.2842
BTNL3	-4154.16	888.046	-14.8481	1.77706e-36	2.92273e-34	72.1973
PKHD1L1	-175.799	29.5192	-14.8475	1.78465e-36	2.92697e-34	72.1931
PGM1	-6906.83	3241.83	-14.8204	2.22052e-36	3.63163e-34	71.9761
AC116035.1	-5.69057	1.03462	-14.8107	2.40086e-36	3.91562e-34	71.8985
CTD-2023N9.1	-5.81762	0.665385	-14.7935	2.75739e-36	4.48456e-34	71.7611
MOBP	-40.5953	7.46538	-14.7841	2.97185e-36	4.81993e-34	71.6867
TSPAN1	-60705	16506.2	-14.7684	3.37227e-36	5.45421e-34	71.5612
MMRN1	-1181.68	219.1	-14.744	4.10425e-36	6.61974e-34	71.3662
PRPH	-310.928	48.3308	-14.7412	4.19958e-36	6.75484e-34	71.3434
RP11-855A2.5	-25.8668	2.85	-14.735	4.41415e-36	7.08046e-34	71.2939
PRKCB	-1051.11	316.015	-14.7097	5.40865e-36	8.65192e-34	71.0921
B3GALT4	-1026.47	507.946	-14.66	8.06485e-36	1.28656e-33	70.6955
FAM187B2P	-7.8627	2.74615	-14.6378	9.63941e-36	1.53356e-33	70.5184
ABCG2	-6136.36	500.073	-14.6364	9.75087e-36	1.54708e-33	70.507
RP11-678G14.3	-38.6281	5.06154	-14.6281	1.04247e-35	1.6495e-33	70.4406
MT2A	-11107.9	2825.65	-14.6171	1.13859e-35	1.79673e-33	70.3531
CMTM5	-42.7971	4.71154	-14.5951	1.35829e-35	2.13764e-33	70.1779
RP11-94C24.13	-37.332	10.2154	-14.5912	1.40179e-35	2.20018e-33	70.1466
SPINK2	-79.6762	12.2269	-14.5898	1.41783e-35	2.21938e-33	70.1353
RP5-894D12.5	-5.85553	1.19231	-14.579	1.54627e-35	2.41395e-33	70.0492
SMPD1	-3694.81	1455.18	-14.5416	2.08848e-35	3.25174e-33	69.7507
CMBL	-10728.1	3964.08	-14.5323	2.24957e-35	3.49323e-33	69.677
ARRDC4	-3360.34	1578.45	-14.5283	2.32369e-35	3.59875e-33	69.6448
TESK2	-633.209	355.508	-14.5231	2.42236e-35	3.74165e-33	69.6035
PLP1	-1356.82	122.862	-14.5206	2.47186e-35	3.80804e-33	69.5834
CNTFR	-1228.76	139.604	-14.4978	2.96951e-35	4.56265e-33	69.4013
OTOP3	-189.806	13.3115	-14.4444	4.55835e-35	6.98552e-33	68.9758
BTNL8	-5337.02	788.346	-14.4384	4.78241e-35	7.30971e-33	68.9282
SYT10	-25.4273	3.7	-14.4315	5.05376e-35	7.70429e-33	68.8734
GLRA4	-105.345	20.95	-14.4273	5.22986e-35	7.95197e-33	68.8394
FMO4	-438.66	197.585	-14.3977	6.63348e-35	1.006e-32	68.6033
TST	-15281.4	7205.79	-14.3951	6.77315e-35	1.02452e-32	68.5827
MXD1	-8601.6	3346.98	-14.3922	6.93263e-35	1.04593e-32	68.5595
MAB21L1	-46.8125	8.13077	-14.3886	7.13596e-35	1.07383e-32	68.5308
CEACAM1	-37068.1	12637.6	-14.3877	7.18349e-35	1.07821e-32	68.5243
MAS1L	-9.79816	1.49231	-14.3845	7.36956e-35	1.1033e-32	68.4989
KIAA1211	-2248.69	682.815	-14.3815	7.55359e-35	1.12796e-32	68.4744
PHOX2A	-35.0697	5.33846	-14.3767	7.84907e-35	1.16909e-32	68.4363
ARHGAP44	-3581.09	1098.29	-14.3753	7.93492e-35	1.17887e-32	68.4255
RP11-483I13.6	-19.875	7.22308	-14.36	8.97549e-35	1.33008e-32	68.3031
FXYD1	-106.885	22.6923	-14.3564	9.23753e-35	1.36545e-32	68.2746
SLC20A1	-8279.21	3343.16	-14.3557	9.29081e-35	1.36986e-32	68.2689
CDKN2B-AS	-15.1732	1.82308	-14.329	1.15112e-34	1.69296e-32	68.0561
RP11-432I5.8	-11.1619	2.15	-14.3137	1.30078e-34	1.90826e-32	67.9348
RP11-349K16.1	-342.492	101.835	-14.3071	1.37181e-34	2.00742e-32	67.882
SUGCT	-465.557	154.592	-14.2832	1.66146e-34	2.42519e-32	67.6918
ADH1B	-5267.82	682.169	-14.2563	2.06226e-34	3.00272e-32	67.4772
NTN1	-1578.98	340.565	-14.2426	2.30041e-34	3.34114e-32	67.3688
SCUBE2	-1080.16	265.562	-14.2365	2.41534e-34	3.49937e-32	67.3203
PIGCP1	-133.028	74.3462	-14.2067	3.06896e-34	4.43533e-32	67.0826
ABI3BP	-2290.71	468.881	-14.195	3.36865e-34	4.85642e-32	66.9901
SLC22A23	-4142.5	1928.18	-14.1904	3.49695e-34	5.02898e-32	66.953
MOCS1	-1199.91	473.427	-14.1724	4.03711e-34	5.79152e-32	66.8104
CD209	-1254.92	314.365	-14.1179	6.2486e-34	8.94209e-32	66.3767
HMP19	-255.414	35.0538	-14.1147	6.41139e-34	9.15261e-32	66.3512
RPL15P21	-17.2797	4.59615	-14.0999	7.22025e-34	1.02822e-31	66.2332
LPHN3	-462.245	126.638	-14.0965	7.41644e-34	1.05359e-31	66.2066
SLCO4C1	-315.963	39.4808	-14.0956	7.47234e-34	1.05895e-31	66.1992
SQRDL	-7641.4	4024.4	-14.0939	7.57055e-34	1.07027e-31	66.1862
SCUBE1	-542.217	160.65	-14.0853	8.11274e-34	1.14415e-31	66.1175
MPEG1	-3719.22	1231.03	-14.0834	8.23395e-34	1.15845e-31	66.1028
GDPD3	-1769.68	524.727	-14.0654	9.51577e-34	1.33557e-31	65.9592
B3GNT7	-15222.8	2130.63	-14.056	1.02547e-33	1.43583e-31	65.8849
RIOK3	-7228.4	3748.61	-14.0539	1.04344e-33	1.4575e-31	65.8677
SFRP1	-2253.44	315.8	-14.0322	1.24074e-33	1.72895e-31	65.6958
AC093642.1	-30.1824	5.55	-14.02	1.36871e-33	1.90274e-31	65.5983
SIAE	-9394.75	4474.57	-14.0172	1.3997e-33	1.94119e-31	65.5761
2021-03-08	-3077.12	1713.43	-14.0101	1.48123e-33	2.0494e-31	65.5199
FBLIM1	-6744.48	4412.75	-13.9999	1.60721e-33	2.21845e-31	65.4389
GCG	-1931.47	147.704	-13.9772	1.92659e-33	2.65301e-31	65.2589
MGLL	-16139.6	8147.62	-13.9748	1.96375e-33	2.69783e-31	65.24
RP11-805I24.3	-77.7295	20.0538	-13.9669	2.09185e-33	2.86707e-31	65.1772
IGHV3OR16-13	-178.439	26.0423	-13.9541	2.31729e-33	3.16861e-31	65.0756
FIGF	-194.845	22.4577	-13.9513	2.36983e-33	3.23288e-31	65.0534
ST6GALNAC6	-9387.8	2061.47	-13.9355	2.69019e-33	3.66136e-31	64.9275
FAM189A2	-199.659	51.0654	-13.9251	2.92354e-33	3.96969e-31	64.8449
AMN	-8307.36	2159.18	-13.8979	3.63221e-33	4.9205e-31	64.6295
NXPE4	-8226.64	1815.62	-13.8862	3.98932e-33	5.39176e-31	64.5364
CCR10	-99.9641	26	-13.8836	4.07264e-33	5.49167e-31	64.5159
B3GNT8	-2565.14	1161.78	-13.8453	5.52981e-33	7.43938e-31	64.2123
CDH10	-15.0789	1.91154	-13.8446	5.56061e-33	7.46361e-31	64.2068
SYNPO	-7676.52	3523.32	-13.8276	6.36807e-33	8.52781e-31	64.0722
SLC16A9	-2592.18	707.031	-13.8244	6.53494e-33	8.73125e-31	64.0465
KLB	-141.407	41.8577	-13.7943	8.30925e-33	1.10765e-30	63.808
IGHV3-7	-675.816	93.2731	-13.793	8.40022e-33	1.11723e-30	63.7972
STAB2	-149.235	44.7615	-13.7791	9.38551e-33	1.24544e-30	63.6871
TCEAL5	-26.417	4.39615	-13.7745	9.73696e-33	1.28914e-30	63.6507
ZER1	-4215.18	2687.15	-13.7647	1.05285e-32	1.39078e-30	63.5731
IGKV2-30	-549.367	80.8154	-13.7525	1.16005e-32	1.52893e-30	63.4768
ITGA8	-618.103	240.246	-13.734	1.34441e-32	1.76792e-30	63.3304
SLCO2A1	-4119.67	1375.1	-13.7323	1.36282e-32	1.78811e-30	63.3169
BMP5	-476.537	125.038	-13.7316	1.37113e-32	1.79499e-30	63.3109
GGT6	-8420.93	3371.6	-13.6948	1.83784e-32	2.40058e-30	63.0201
FLJ38122	-11.0717	2.98462	-13.6669	2.29575e-32	2.99201e-30	62.7993
PDZD4	-434.372	83.0462	-13.6578	2.46997e-32	3.21189e-30	62.7267
TLCD2	-1799.15	899.688	-13.6504	2.61991e-32	3.3993e-30	62.6682
SLC41A2	-2128.39	1015.59	-13.6088	3.64943e-32	4.7246e-30	62.3392
BMX	-317.779	86.5269	-13.6058	3.73693e-32	4.82717e-30	62.3157
FABP1	-127723	29085.9	-13.6012	3.87679e-32	4.99678e-30	62.2792
CPT2	-2982.69	1741.92	-13.5892	4.26671e-32	5.48724e-30	62.1841
CIPC	-2119.99	1450.15	-13.5793	4.61469e-32	5.92171e-30	62.1063
RP11-232L2.2	-6.06045	1	-13.5786	4.63994e-32	5.94106e-30	62.1009
LINC00908	-11.8248	3.21538	-13.576	4.74036e-32	6.05635e-30	62.0796
CUX2	-16.4682	4.10769	-13.5669	5.09546e-32	6.49583e-30	62.0079
ACACB	-2459.66	1129.89	-13.5541	5.63976e-32	7.17404e-30	61.9072
CCL23	-76.1117	17.1346	-13.5485	5.90059e-32	7.48952e-30	61.8623
ACVRL1	-6327.72	2802.18	-13.5421	6.20765e-32	7.86217e-30	61.812
PCAT18	-14.0727	2.48077	-13.5408	6.27452e-32	7.92967e-30	61.8013
CLEC10A	-646.48	154.304	-13.5226	7.25251e-32	9.14584e-30	61.6576
C5orf66-AS1	-32.7541	10.0115	-13.5165	7.61257e-32	9.57921e-30	61.6095
MOB3B	-2954.21	1580.97	-13.5011	8.604e-32	1.08035e-29	61.488
FMO5	-3138.76	1021.2	-13.4777	1.03617e-31	1.29826e-29	61.3035
CTSLP8	-3.67316	0.365385	-13.4371	1.43188e-31	1.79022e-29	60.9824
RCAN2	-1092.59	414.773	-13.4324	1.48605e-31	1.85397e-29	60.9456
CTD-2588E21.1	-18.6568	6.55385	-13.4167	1.68332e-31	2.0956e-29	60.8219
RP11-528A4.2	-163.839	62.9308	-13.4111	1.76046e-31	2.18697e-29	60.7774
CCDC68	-1935.71	666.6	-13.3972	1.96602e-31	2.43715e-29	60.6678
JPH4	-74.2162	19.7885	-13.3868	2.1355e-31	2.64164e-29	60.5857
MAOA	-21040	6873.29	-13.3809	2.23693e-31	2.76126e-29	60.5397
CD177P1	-282.814	19.9654	-13.3682	2.47564e-31	3.04948e-29	60.439
IRF4	-1071.05	270.673	-13.3584	2.67615e-31	3.28953e-29	60.3617
RP11-170L3.7	-84.543	13.5346	-13.3557	2.73299e-31	3.35233e-29	60.3409
RP11-654D12.2	-8.85963	1.37308	-13.3417	3.05446e-31	3.73879e-29	60.2305
CPNE5	-873.453	292.923	-13.3315	3.31164e-31	4.04511e-29	60.1503
C16orf89	-396.005	70.9269	-13.3055	4.07157e-31	4.96298e-29	59.9453
RP11-380P13.1	-18.6189	2.77692	-13.2975	4.33814e-31	5.2769e-29	59.8823
DHRS9	-7544.77	1175.83	-13.2908	4.57493e-31	5.55336e-29	59.8296
C11orf86	-1704.21	200.977	-13.2863	4.74355e-31	5.74609e-29	59.7937
KIAA2022	-117.688	22.2423	-13.276	5.14791e-31	6.223e-29	59.7125
NRG2	-51.8391	10.5385	-13.2689	5.44554e-31	6.56919e-29	59.6567
LRRC66	-1036.89	382.608	-13.268	5.48273e-31	6.60042e-29	59.6499
PRDX6	-15955.3	9599.73	-13.2571	5.98147e-31	7.18601e-29	59.5635
BEND4	-43.7736	10.3577	-13.2315	7.32773e-31	8.78531e-29	59.3621
ANKRD9	-3947.27	1913.82	-13.2022	9.24013e-31	1.10554e-28	59.132
DUSP21	-4.56455	0.403846	-13.1987	9.49898e-31	1.13419e-28	59.1045
FLVCR2	-1029.07	313.762	-13.1928	9.95482e-31	1.18619e-28	59.058
AC104024.1	-18.1424	3.16154	-13.1818	1.08615e-30	1.29159e-28	58.9715
TCF21	-610.039	215.627	-13.1764	1.1335e-30	1.34515e-28	58.9292
ABHD5	-938.307	610.935	-13.174	1.15577e-30	1.36881e-28	58.9099
CPNE8	-793.887	311.842	-13.1662	1.22943e-30	1.45309e-28	58.8486
P2RY14	-557.529	131.531	-13.1556	1.33736e-30	1.57747e-28	58.765
SLC9A3	-19783.2	2532	-13.1416	1.49376e-30	1.75839e-28	58.6553
SMIM6	-378.875	146.065	-13.1387	1.52898e-30	1.79623e-28	58.6322
MYOT	-109.034	20.2385	-13.13	1.63731e-30	1.91963e-28	58.5642
CPM	-3596.95	1025.53	-13.1249	1.70479e-30	1.99474e-28	58.5242
GSG1L	-19.3627	3.45385	-13.0988	2.09654e-30	2.44821e-28	58.3189
IGSF9	-2889.38	1235.11	-13.0978	2.11266e-30	2.45733e-28	58.3113
STYK1	-1131.37	512.442	-13.0978	2.11276e-30	2.45733e-28	58.3112
AC103563.5	-68.248	9.82692	-13.0962	2.14015e-30	2.48423e-28	58.2985
SLC9A1	-6725.46	3489.54	-13.0913	2.22415e-30	2.57662e-28	58.2603
ACO2	-8790.56	5793.52	-13.0824	2.38642e-30	2.75912e-28	58.1904
RP11-459C13.1	-12.0758	2.79231	-13.0536	2.99706e-30	3.45829e-28	57.9643
KLF9	-3264.26	1308.55	-13.0474	3.14738e-30	3.62458e-28	57.9157
HSD3BP2	-32.292	2.50769	-13.0274	3.68862e-30	4.23951e-28	57.7583
VIPR1	-4457.31	1865.74	-13.0241	3.78506e-30	4.34182e-28	57.7327
ABCB11	-305.057	26.9654	-13.0163	4.02528e-30	4.60831e-28	57.6716
B4GALNT2	-9213.34	986.635	-13.0098	4.23893e-30	4.84341e-28	57.6203
MPZ	-361.606	73.8346	-12.9873	5.06272e-30	5.77338e-28	57.4441
ELAVL3	-26.8822	4.83462	-12.9617	6.19734e-30	7.0535e-28	57.2434
GNG2	-1095.91	461.777	-12.9608	6.24222e-30	7.09075e-28	57.2363
PP7080	-16001	2611.21	-12.9228	8.42668e-30	9.55356e-28	56.9385
DHDDS	-2490.73	1799.55	-12.9121	9.17123e-30	1.03775e-27	56.8545
CAPN5	-14448.7	7684.34	-12.9099	9.33117e-30	1.05381e-27	56.8373
FOXF2	-973.213	286.677	-12.9089	9.4089e-30	1.06054e-27	56.8291
RP11-284N8.3	-216.476	63.6577	-12.9064	9.59432e-30	1.07935e-27	56.8097
BAI3	-105.991	18.9692	-12.9024	9.8974e-30	1.11131e-27	56.7789
RP11-77K12.7	-35.5256	7.47308	-12.8989	1.01743e-29	1.14021e-27	56.7515
CDHR5	-36597.5	7331.49	-12.8887	1.10323e-29	1.23399e-27	56.6712
AFF3	-378.002	85.6346	-12.8797	1.18472e-29	1.3226e-27	56.6005
AC004947.2	-23.1588	4.95385	-12.8692	1.28624e-29	1.4332e-27	56.5189
OPN3	-836.573	376.346	-12.8571	1.4154e-29	1.57411e-27	56.4239
B3GALT5	-9575.73	1792.48	-12.8454	1.55211e-29	1.72287e-27	56.3325
LINC00294	-573.441	417.723	-12.8401	1.6183e-29	1.79294e-27	56.291
NEFM	-68.4057	12.3038	-12.8369	1.66001e-29	1.83566e-27	56.2658
RBM47	-11694.7	7847.27	-12.8349	1.68591e-29	1.86078e-27	56.2504
MYOC	-296.96	34.8769	-12.8305	1.74572e-29	1.92316e-27	56.2158
PAG1	-3613.13	1575.03	-12.829	1.76626e-29	1.94213e-27	56.2042
SCN2B	-160.557	27.8231	-12.8243	1.83353e-29	2.0123e-27	56.1671
CTD-2001J20.1	-11.75	2.22308	-12.824	1.83705e-29	2.01238e-27	56.1652
LGALS9C	-1219.99	236.15	-12.822	1.86734e-29	2.04173e-27	56.149
C1QTNF9	-29.5973	7.41154	-12.8192	1.90815e-29	2.08245e-27	56.1276
PDCD4-AS1	-116.184	64.2154	-12.8174	1.93561e-29	2.10848e-27	56.1134
PIGZ	-4418.06	1570.01	-12.817	1.94132e-29	2.11076e-27	56.1105
CRHBP	-26.4641	7.22692	-12.8115	2.02761e-29	2.20048e-27	56.0673
AKR1B10	-7170.07	1223.98	-12.8092	2.06488e-29	2.23677e-27	56.0492
IGHV3-72	-2009.43	363.85	-12.7989	2.23897e-29	2.42087e-27	55.9689
IGKV1-12	-341.036	54.1385	-12.7961	2.28923e-29	2.47063e-27	55.9469
TMEM59L	-132.948	27.5462	-12.7741	2.72153e-29	2.93177e-27	55.7753
ATP8B1	-17431.1	9117.99	-12.7716	2.77699e-29	2.986e-27	55.7553
EMILIN3	-62.6127	17.3654	-12.7662	2.89706e-29	3.10939e-27	55.7133
DIRAS1	-134.334	38.8077	-12.7575	3.10318e-29	3.3245e-27	55.6451
KLRB1	-343.182	116.812	-12.7507	3.27439e-29	3.5015e-27	55.5918
RP11-452I5.2	-283.553	91.8962	-12.7223	4.09429e-29	4.37026e-27	55.3701
IGKV6-21	-454.286	86.6077	-12.7216	4.11622e-29	4.38565e-27	55.3648
RP3-407E4.3	-23.3473	2.77692	-12.7067	4.62729e-29	4.92119e-27	55.2487
TOM1L2	-3532.79	2378.17	-12.7064	4.6378e-29	4.9234e-27	55.2464
ASTN1	-76.6814	11.85	-12.7057	4.66413e-29	4.94237e-27	55.2408
RAB27A	-2174.69	1232.88	-12.7054	4.67592e-29	4.94589e-27	55.2383
LY9	-233.736	73.5231	-12.705	4.69111e-29	4.95298e-27	55.2351
JAM2	-986.014	296.288	-12.7042	4.721e-29	4.97554e-27	55.2288
RP11-521D12.4	-16.2059	1.35385	-12.7016	4.81772e-29	5.06833e-27	55.2087
RELL1	-438.696	173.738	-12.6905	5.25476e-29	5.51816e-27	55.1225
GRIK3	-390.85	59.5769	-12.688	5.36201e-29	5.62067e-27	55.1025
GPD1L	-4719.46	2879.53	-12.6774	5.827e-29	6.09715e-27	55.02
GLIPR2	-1990.26	930.281	-12.6765	5.86639e-29	6.12739e-27	55.0133
MAGEE2	-9.25205	1.94231	-12.6739	5.98821e-29	6.24346e-27	54.9929
SLC9A9	-423.576	157.115	-12.6657	6.38647e-29	6.64683e-27	54.929
SLC2A13	-1586.13	741.788	-12.6634	6.50417e-29	6.75728e-27	54.9109
GPR37L1	-300.527	115.342	-12.6609	6.63296e-29	6.87884e-27	54.8914
AP001627.1	-92.6721	12.2808	-12.658	6.78703e-29	7.02614e-27	54.8686
SLC9A2	-3905.97	1233.84	-12.647	7.40102e-29	7.64821e-27	54.7827
C5orf30	-2087.71	1369.82	-12.644	7.5754e-29	7.81457e-27	54.7596
AP3S2	-1778.96	1195.83	-12.6215	9.0442e-29	9.31329e-27	54.5838
FAM46C	-4103.67	1304.36	-12.6116	9.77277e-29	1.00458e-26	54.5069
MARVELD3	-3072.59	1868.49	-12.6084	1.00237e-28	1.02857e-26	54.4818
CLDN7	-22738.4	14617.9	-12.6052	1.02792e-28	1.05294e-26	54.4568
PCSK5	-3266.92	836.681	-12.5983	1.08513e-28	1.10959e-26	54.4031
CTSG	-332.656	61.0654	-12.5862	1.19329e-28	1.21805e-26	54.3088
KAT2B	-1298.28	642.554	-12.5854	1.20008e-28	1.22284e-26	54.3032
RP11-1166P10.8	-74.1107	16.45	-12.5829	1.22462e-28	1.24567e-26	54.2831
SEMA3E	-229.575	39.3654	-12.5806	1.24607e-28	1.26529e-26	54.2659
NEGR1	-1177.55	268.227	-12.5692	1.36303e-28	1.37992e-26	54.1769
HMOX1	-3549.09	1435	-12.5692	1.36368e-28	1.37992e-26	54.1764
LRRC1	-2669.69	2049.1	-12.5682	1.37409e-28	1.38805e-26	54.1689
ASB2	-1214.12	265.965	-12.5609	1.45536e-28	1.4676e-26	54.1119
RP11-807H22.5	-75.4375	5.89231	-12.5603	1.46234e-28	1.4721e-26	54.1071
RP11-96D1.6	-75.9498	17.6615	-12.5579	1.49002e-28	1.49738e-26	54.0885
HOXD1	-121.671	27.7538	-12.5567	1.5031e-28	1.50793e-26	54.0799
HRCT1	-1324.03	344.196	-12.5521	1.55929e-28	1.56162e-26	54.0435
VAT1L	-324.505	115.277	-12.5229	1.95957e-28	1.95914e-26	53.8168
IGHV3-38	-75.8115	16.1038	-12.5213	1.98538e-28	1.98155e-26	53.8038
XXbac-BPG13B8.10	-17.54	2.97692	-12.4872	2.59357e-28	2.58414e-26	53.5387
FHL1	-9982.96	1874.68	-12.4785	2.77516e-28	2.76036e-26	53.4716
ITPKA	-1583.71	610.185	-12.4746	2.86252e-28	2.84241e-26	53.4408
TMPRSS2	-18951	10042.9	-12.4718	2.92562e-28	2.90014e-26	53.4192
HRASLS2	-515.738	83.75	-12.47	2.96688e-28	2.93606e-26	53.4053
AC131263.1	-30.5379	14.6538	-12.4648	3.09156e-28	3.05427e-26	53.3645
CCDC69	-4449.45	1157.49	-12.435	3.90233e-28	3.84874e-26	53.1335
TRPV3	-604.168	106.762	-12.4266	4.16882e-28	4.10464e-26	53.0679
RP11-963H4.3	-36.3227	10.85	-12.425	4.22171e-28	4.14971e-26	53.0554
RHOU	-3548.52	1798.72	-12.4127	4.64558e-28	4.55868e-26	52.9605
RP11-293M10.6	-75.792	34.4346	-12.4115	4.69104e-28	4.5915e-26	52.9509
KCNA3	-114.116	33.7192	-12.4114	4.69475e-28	4.5915e-26	52.9501
CD1D	-277.214	114.658	-12.4088	4.79066e-28	4.67746e-26	52.93
RP11-542M13.2	-70.4518	13.6962	-12.4076	4.83728e-28	4.7151e-26	52.9204
CNTNAP3	-76.6711	17.4846	-12.3976	5.22959e-28	5.089e-26	52.8431
RP11-434H14.1	-16.2941	2.14615	-12.3918	5.47342e-28	5.31741e-26	52.7979
CDKL1	-184.662	93.5769	-12.3861	5.72146e-28	5.54915e-26	52.7539
PDLIM2	-1271.78	681.608	-12.3789	6.05276e-28	5.86074e-26	52.6981
IGHA1	-328550	60858.4	-12.348	7.70393e-28	7.44718e-26	52.4588
IGLV5-37	-202.184	25.0077	-12.3437	7.97129e-28	7.69289e-26	52.425
NRXN1	-501.135	52.4538	-12.3198	9.60987e-28	9.25893e-26	52.2395
IGHV3-76	-34.3125	6.61154	-12.3065	1.06568e-27	1.02507e-25	52.137
HSD3B2	-1283.88	92.6308	-12.3031	1.09459e-27	1.05115e-25	52.1104
SUCLG2	-9812.19	6303.01	-12.2949	1.1668e-27	1.11865e-25	52.047
IGLJ1	-13.3279	2.74231	-12.2909	1.20352e-27	1.15196e-25	52.0163
PPAP2B	-2965.56	1706.06	-12.283	1.28075e-27	1.22388e-25	51.9546
HSD17B11	-9066.62	5286.39	-12.2707	1.40965e-27	1.34486e-25	51.8595
DPT	-4037.01	634.738	-12.2564	1.5753e-27	1.50044e-25	51.7493
SCN4B	-330.903	110.523	-12.244	1.73605e-27	1.65086e-25	51.6529
HMGCS2	-46344	11717.9	-12.2353	1.85727e-27	1.76326e-25	51.586
MB	-510.621	132.677	-12.2292	1.94752e-27	1.84594e-25	51.5389
NBPF1	-1189.3	723.892	-12.2274	1.97507e-27	1.86902e-25	51.525
IGHV3OR16-9	-84.0051	17.2269	-12.2258	2.00022e-27	1.88975e-25	51.5125
FCGBP	-179692	36288.9	-12.2217	2.06476e-27	1.94758e-25	51.481
RP11-326K13.4	-39.0389	26.7385	-12.2213	2.07155e-27	1.95083e-25	51.4777
MYOM1	-766.815	159.312	-12.221	2.07616e-27	1.95202e-25	51.4755
STIM1	-3211.84	2601.5	-12.2061	2.33147e-27	2.18855e-25	51.3605
ADCY5	-1410.75	335.627	-12.2048	2.35689e-27	2.20886e-25	51.3497
SEPP1	-32925	5440.97	-12.2032	2.38607e-27	2.23262e-25	51.3375
SPATA31E1	-5.14652	0.857692	-12.1828	2.79596e-27	2.61196e-25	51.1803
VIP	-1863.82	386.75	-12.1767	2.93281e-27	2.73543e-25	51.1329
SLC35G1	-991.697	538.081	-12.1721	3.03911e-27	2.82881e-25	51.0976
C16orf54	-281.207	102.723	-12.172	3.04262e-27	2.82881e-25	51.0964
DISP2	-1094.57	299.604	-12.1678	3.14373e-27	2.91817e-25	51.064
STOX2	-211.084	56.7808	-12.1577	3.40055e-27	3.15156e-25	50.9861
LITAF	-10253.3	7269.21	-12.1558	3.45096e-27	3.1932e-25	50.9715
IGLV7-43	-1582.57	262.504	-12.149	3.639e-27	3.36187e-25	50.9189
NCR2	-8.06557	1.43077	-12.1433	3.80271e-27	3.50756e-25	50.8753
KRT9	-15.0697	3.10769	-12.1413	3.86285e-27	3.55741e-25	50.8597
RIMS4	-114.541	16.7577	-12.1392	3.92728e-27	3.60648e-25	50.8433
SRPX	-1055.02	281.838	-12.1391	3.92848e-27	3.60648e-25	50.843
HAGLR	-1945.61	579.869	-12.1355	4.04127e-27	3.7042e-25	50.8149
XKR4	-168.6	19.9	-12.1262	4.34582e-27	3.9755e-25	50.7429
GPR119	-7.49795	1.08846	-12.126	4.35087e-27	3.9755e-25	50.7417
THRB	-1501.35	489.165	-12.1233	4.44458e-27	4.05477e-25	50.7206
SLC16A12	-20.415	5.65385	-12.1208	4.5317e-27	4.12781e-25	50.7013
SSBP2	-699.737	293.262	-12.113	4.81466e-27	4.37872e-25	50.6413
PTGS1	-4516.64	979.935	-12.1057	5.0961e-27	4.62747e-25	50.5849
STAP2	-6602.16	4408.69	-12.0901	5.75036e-27	5.21345e-25	50.4651
FAM107B	-4037.72	2238.32	-12.0895	5.77766e-27	5.23008e-25	50.4605
IGHV3-71	-76.5123	17.4462	-12.0757	6.4327e-27	5.81403e-25	50.3539
BCAR3	-1577.99	913.119	-12.0682	6.82028e-27	6.15481e-25	50.2959
CGN	-11055.1	6783.44	-12.0675	6.85586e-27	6.17737e-25	50.2908
MPND	-1711.79	1254.74	-12.0646	7.0107e-27	6.30715e-25	50.2686
ASPA	-414.666	47.7269	-12.0365	8.72438e-27	7.83677e-25	50.0518
COL4A6	-203.026	56.7808	-12.0264	9.43094e-27	8.45844e-25	49.9745
C1QTNF2	-125.312	57.4615	-12.0166	1.01829e-26	9.11886e-25	49.8985
RP11-671J11.7	-4.01434	1.10769	-12.0126	1.05031e-26	9.3912e-25	49.8678
VSTM2A-OT1	-6.95697	0.846154	-12.011	1.06338e-26	9.49355e-25	49.8555
PPARGC1A	-1814.16	746.292	-12.0103	1.06876e-26	9.52701e-25	49.8505
IGKV1OR2-108	-468.989	80.9346	-12.0077	1.09115e-26	9.71175e-25	49.8299
CASC18	-17.4775	4.22308	-12.0051	1.11323e-26	9.89321e-25	49.8101
PTN	-538.641	160.131	-11.9965	1.18983e-26	1.05578e-24	49.7441
ATCAY	-66.1342	11.1231	-11.994	1.21291e-26	1.07463e-24	49.725
PJA2	-4904.93	3608.35	-11.9898	1.25282e-26	1.10831e-24	49.6929
LARGE	-1876.12	1212.52	-11.988	1.27048e-26	1.12223e-24	49.679
SLC5A7	-70.1281	10.5	-11.9856	1.29486e-26	1.14081e-24	49.6602
PLCD3	-11461	5231.81	-11.9855	1.29542e-26	1.14081e-24	49.6598
RP11-812E19.9	-79.2367	15.5769	-11.9757	1.39763e-26	1.22896e-24	49.5845
CDH19	-310.84	46.5385	-11.9621	1.55356e-26	1.36402e-24	49.4796
ATP2A3	-15365.8	5707.76	-11.9599	1.58046e-26	1.38556e-24	49.4625
PDE2A	-750.514	207.296	-11.9596	1.58418e-26	1.38674e-24	49.4602
ATP6V0D1	-6207.56	5209.07	-11.9566	1.62131e-26	1.41712e-24	49.4372
GALNT12	-3904.5	2192.77	-11.9506	1.69878e-26	1.48261e-24	49.391
NDRG2	-5835.91	3453.78	-11.9498	1.70909e-26	1.48938e-24	49.385
PI16	-1122.09	147.777	-11.9457	1.76448e-26	1.53536e-24	49.3533
IGHV3OR16-6	-60.0154	10.3654	-11.9452	1.77125e-26	1.53896e-24	49.3495
MT1DP	-38.6844	8.94615	-11.9439	1.78906e-26	1.55213e-24	49.3396
C2orf40	-253.461	35.5115	-11.9321	1.95995e-26	1.69786e-24	49.2491
NEURL1B	-5540.39	3048.3	-11.9227	2.10827e-26	1.82363e-24	49.1768
RP4-651E10.4	-19.6465	4.75	-11.9094	2.33623e-26	2.01783e-24	49.075
EPB41L4B	-8747.48	5326.89	-11.902	2.47517e-26	2.13468e-24	49.0177
IQGAP2	-5007.36	2283.85	-11.898	2.55197e-26	2.19767e-24	48.9874
ATP6V1G2	-51.0215	18.4308	-11.8903	2.70853e-26	2.32905e-24	48.9284
APOBR	-6692.11	2614.22	-11.8827	2.87266e-26	2.46656e-24	48.8701
RP11-646E18.2	-4.19262	0.815385	-11.8769	3.00532e-26	2.57668e-24	48.8253
P2RY4	-64.8238	8.41538	-11.867	3.24464e-26	2.77778e-24	48.7493
HTR4	-234.752	55.8192	-11.8613	3.39096e-26	2.8988e-24	48.7056
IGLV5-45	-673.434	145.008	-11.8552	3.55375e-26	3.03352e-24	48.6591
HBB	-6562.34	990.308	-11.8522	3.63828e-26	3.10114e-24	48.6358
SGK2	-2940.4	1333.98	-11.8445	3.86167e-26	3.28675e-24	48.5767
CCDC158	-37.002	15.15	-11.8338	4.19342e-26	3.56392e-24	48.495
GFRA1	-1014.94	209.581	-11.8284	4.37014e-26	3.70871e-24	48.4541
NPY	-43.5318	7.33462	-11.8169	4.77757e-26	4.0486e-24	48.3657
HMCN2	-2755.2	808.542	-11.8136	4.89993e-26	4.14627e-24	48.3406
ANGPTL7	-169.484	23.6962	-11.7936	5.71809e-26	4.83158e-24	48.1875
P2RY12	-54.6516	15.9615	-11.7919	5.79694e-26	4.89113e-24	48.1739
CNTN2	-152.848	23.8077	-11.7814	6.28249e-26	5.29316e-24	48.0942
RIMKLA	-1157.72	578.277	-11.7669	7.02857e-26	5.91321e-24	47.9829
PRKACB	-6313.22	2664.66	-11.7629	7.24872e-26	6.08965e-24	47.9523
IGKV3OR2-268	-138.598	27.9308	-11.7624	7.27407e-26	6.10217e-24	47.9489
GPR142	-10.2367	2.83077	-11.7553	7.68857e-26	6.44064e-24	47.8939
SSTR3	-32.0656	8.40769	-11.7466	8.21996e-26	6.87591e-24	47.8277
TARID	-37.2869	12.7577	-11.7419	8.52053e-26	7.11714e-24	47.7921
CTD-2026C7.1	-30.1311	5.72308	-11.7379	8.79003e-26	7.33176e-24	47.7612
LTBP4	-12764.3	5857.98	-11.733	9.13107e-26	7.60059e-24	47.7235
CCNYL1	-1619.24	1184.22	-11.7329	9.13837e-26	7.60059e-24	47.7227
GCNT3	-17863.4	4918.92	-11.7318	9.20951e-26	7.64887e-24	47.715
RBKS	-440.605	229.885	-11.7302	9.32781e-26	7.73612e-24	47.7023
RP1-278O22.1	-169.585	51.7885	-11.7298	9.35642e-26	7.74884e-24	47.6993
IGFBP6	-1505.09	435.965	-11.7214	9.97895e-26	8.2527e-24	47.6354
STK17B	-2940.01	1841.66	-11.7172	1.03134e-25	8.51725e-24	47.6027
TTLL6	-406.686	115.715	-11.7024	1.1558e-25	9.5316e-24	47.4898
RGS9	-147.911	52.0038	-11.6972	1.20236e-25	9.90157e-24	47.4506
RP11-209E8.1	-61.0615	5.94615	-11.6952	1.22113e-25	1.0042e-23	47.4353
MAPK4	-224.901	32.8769	-11.6946	1.22729e-25	1.00784e-23	47.4303
HS3ST6	-54.4129	5.12308	-11.6869	1.30175e-25	1.06749e-23	47.3719
RP11-532F6.3	-126.287	38.7346	-11.6763	1.41261e-25	1.15677e-23	47.2909
ANKRD33B	-195.035	80.0923	-11.6738	1.4406e-25	1.17804e-23	47.2714
ANO10	-3047.96	2139.42	-11.667	1.51706e-25	1.23884e-23	47.2201
MYO1A	-16043.9	4378.31	-11.6644	1.54872e-25	1.26292e-23	47.1997
MAFA	-15.1045	3.7	-11.6615	1.58374e-25	1.28967e-23	47.1775
RP11-449D8.5	-4.09119	0.973077	-11.6586	1.61886e-25	1.31644e-23	47.1558
CPT1A	-11111	7234.18	-11.6545	1.67057e-25	1.3566e-23	47.1246
C7orf31	-574.517	292.4	-11.652	1.70286e-25	1.3809e-23	47.1056
XXyac-YM21GA2.7	-109.047	7.78846	-11.6501	1.7281e-25	1.39943e-23	47.091
DAAM2	-1135.99	454.038	-11.6469	1.77169e-25	1.43274e-23	47.0663
RP11-345P4.9	-264.668	167.119	-11.6451	1.79599e-25	1.45038e-23	47.0528
CPEB3	-415.31	274.935	-11.644	1.81155e-25	1.46093e-23	47.0443
CBX7	-2059.96	1035.37	-11.6414	1.84776e-25	1.48807e-23	47.0247
PLCG2	-1244.23	531.465	-11.6331	1.96925e-25	1.58373e-23	46.9615
PDE7B	-226.783	78.4231	-11.6278	2.05167e-25	1.64774e-23	46.9209
SLC7A14	-105.766	14.4923	-11.6262	2.07661e-25	1.66548e-23	46.9089
RP11-102N12.3	-27.835	11.5654	-11.6257	2.08547e-25	1.67029e-23	46.9047
BARX2	-1119.94	322.165	-11.6156	2.25355e-25	1.80244e-23	46.8278
CADM2	-162.018	20.3269	-11.615	2.26391e-25	1.80825e-23	46.8233
KIAA1161	-6602.92	4125.03	-11.6086	2.37799e-25	1.89677e-23	46.7746
CMA1	-114.385	18.4038	-11.6079	2.39009e-25	1.90382e-23	46.7695
LINC00940	-60.4508	16.7692	-11.6059	2.42756e-25	1.93104e-23	46.7541
ARHGEF37	-1339.04	682.485	-11.5966	2.60784e-25	2.07162e-23	46.6831
IGHV3-47	-53.5758	13.0962	-11.5949	2.64154e-25	2.09554e-23	46.6704
PCOLCE2	-545.948	103.462	-11.5667	3.28146e-25	2.59965e-23	46.4553
SLC44A4	-27051.3	14174	-11.5607	3.43575e-25	2.7182e-23	46.4098
DPF3	-331.934	95.9923	-11.5533	3.63603e-25	2.87276e-23	46.3536
IGHV3-75	-22.2531	4.55385	-11.5528	3.65107e-25	2.88075e-23	46.3495
CPEB1	-113.961	25.6769	-11.5463	3.83783e-25	3.02401e-23	46.3001
EYA2	-1055.05	232.062	-11.5378	4.09479e-25	3.22214e-23	46.2358
FNBP1	-3776.44	1822.02	-11.5086	5.12319e-25	4.02594e-23	46.0137
SIDT2	-2802.92	1942.75	-11.4928	5.78113e-25	4.53687e-23	45.894
NCAM1	-1263.58	279.8	-11.4905	5.88566e-25	4.6127e-23	45.8762
RP4-668J24.2	-14.873	4.79231	-11.4682	6.97874e-25	5.46203e-23	45.7074
PRKAR2B	-928.372	334.446	-11.4656	7.12222e-25	5.56687e-23	45.6872
ANK2	-1494.76	326.346	-11.463	7.26436e-25	5.67038e-23	45.6676
PAMR1	-558.5	235.369	-11.4523	7.88634e-25	6.14766e-23	45.5862
GALR1	-26.9672	4.44231	-11.449	8.08692e-25	6.29562e-23	45.5613
FOXD3	-43.6281	7.11923	-11.4433	8.44334e-25	6.56433e-23	45.5185
ASXL3	-198.457	60.1308	-11.4302	9.33757e-25	7.2499e-23	45.4188
RP11-51F16.9	-26.1445	16.0269	-11.4225	9.90092e-25	7.67709e-23	45.3607
IGLV2-14	-8215.2	2103.92	-11.409	1.09811e-24	8.50334e-23	45.2581
C10orf105	-7.96824	2.08462	-11.4061	1.12272e-24	8.68242e-23	45.2361
WI2-2373I1.2	-5.3043	0.834615	-11.401	1.16728e-24	9.01506e-23	45.1975
LUZP2	-136.482	36.2923	-11.384	1.3291e-24	1.02513e-22	45.0689
LCN6	-19.5502	4.21538	-11.38	1.37007e-24	1.05465e-22	45.0388
NPY2R	-94.2275	8.94615	-11.3799	1.37099e-24	1.05465e-22	45.0381
CHL1	-642.329	192.012	-11.3772	1.40013e-24	1.07565e-22	45.0173
RPH3A	-23.793	6.04615	-11.3765	1.40761e-24	1.07997e-22	45.012
UGT2A3	-5892.4	988.646	-11.3761	1.4114e-24	1.08146e-22	45.0093
GFI1B	-70.7725	16.4577	-11.372	1.45693e-24	1.11489e-22	44.9778
TMEM35	-638.197	110.827	-11.3697	1.48268e-24	1.13311e-22	44.9605
IGHV3OR15-7	-79.3955	17.8654	-11.3674	1.508e-24	1.15095e-22	44.9437
CCL28	-3971.02	1320.48	-11.3648	1.53869e-24	1.17284e-22	44.9237
ATP1A2	-1905.98	229.688	-11.3633	1.55633e-24	1.1837e-22	44.9124
RP11-710C12.1	-17.9652	7.76538	-11.3633	1.55699e-24	1.1837e-22	44.912
ADAMTSL1	-656.058	248.377	-11.3612	1.58137e-24	1.20067e-22	44.8966
LIMA1	-14006.3	8148.98	-11.3577	1.62426e-24	1.23163e-22	44.8701
GFRA3	-253.034	43.85	-11.3492	1.73352e-24	1.31277e-22	44.8056
ENTPD8	-4525.17	1071.24	-11.3438	1.8063e-24	1.36612e-22	44.7648
RP5-1148A21.3	-128.01	59.4923	-11.3431	1.81635e-24	1.37194e-22	44.7593
TNFSF10	-5284.87	3366.54	-11.3318	1.98e-24	1.49362e-22	44.6738
RP11-567C2.1	-25.8801	5.15	-11.3258	2.07273e-24	1.56156e-22	44.6285
SLC17A1	-23.999	6.66538	-11.3242	2.09745e-24	1.57814e-22	44.6167
GNG8	-16.5891	4.11923	-11.3231	2.11571e-24	1.58983e-22	44.6081
BAALC	-91.7623	28.8846	-11.3175	2.20674e-24	1.65611e-22	44.5664
TMEM253	-559.783	87.9154	-11.3109	2.32054e-24	1.73928e-22	44.5165
MPC1	-2191.96	1581.37	-11.3071	2.38991e-24	1.78897e-22	44.4873
ADCYAP1R1	-220.46	28.9192	-11.3044	2.43912e-24	1.82347e-22	44.4672
CYP2B7P	-337.988	49.8115	-11.3021	2.48207e-24	1.85321e-22	44.4499
IGKV3-20	-14266	3877.67	-11.2925	2.67091e-24	1.99166e-22	44.3772
ATP2B3	-24.8289	4.01154	-11.29	2.72096e-24	2.02639e-22	44.3588
PLS1	-16404.1	10082.6	-11.2868	2.78899e-24	2.0744e-22	44.3343
EPAS1	-10712.3	6977.62	-11.2832	2.86686e-24	2.12961e-22	44.307
IGSF10	-299.648	80.5423	-11.2824	2.88481e-24	2.14022e-22	44.3008
BDKRB1	-187.968	82.6615	-11.2818	2.89791e-24	2.14721e-22	44.2963
SIGLEC6	-50.2982	15.9846	-11.2802	2.93354e-24	2.16852e-22	44.2842
RCAN1	-3162.41	1869.7	-11.2801	2.93409e-24	2.16852e-22	44.2841
F2RL1	-6707.13	4617.12	-11.2769	3.00841e-24	2.21932e-22	44.2593
LINC01135	-13.374	6.51154	-11.2768	3.01044e-24	2.21932e-22	44.2586
DNAJC28	-59.8043	33.9385	-11.2746	3.06001e-24	2.25302e-22	44.2424
GALNT16	-252.383	68.2731	-11.2729	3.1004e-24	2.27989e-22	44.2294
AC093627.8	-26.585	5.73846	-11.268	3.21738e-24	2.36293e-22	44.1927
PDE8A	-2817.38	2018.18	-11.2671	3.2415e-24	2.37766e-22	44.1853
PRSS36	-202.499	116.15	-11.2509	3.66676e-24	2.68621e-22	44.0631
HADHB	-6396.21	5233.84	-11.2463	3.79766e-24	2.77862e-22	44.0284
RP5-965F6.2	-7.37398	2.39231	-11.2457	3.8132e-24	2.7865e-22	44.0243
RSPO2	-438.054	45.9654	-11.2433	3.88307e-24	2.83401e-22	44.0063
KRT20	-76639.8	19007.8	-11.2431	3.88839e-24	2.83435e-22	44.005
COL6A5	-78.8443	13.5077	-11.2348	4.14402e-24	3.01692e-22	43.9419
CHST5	-1080.9	249.492	-11.2257	4.44053e-24	3.22876e-22	43.8734
FRRS1L	-96.5902	18.1038	-11.2184	4.6927e-24	3.40787e-22	43.8187
PAFAH2	-2049.23	1484.44	-11.2157	4.79188e-24	3.47557e-22	43.798
HCG23	-6.30225	1.77308	-11.2034	5.26215e-24	3.81193e-22	43.7052
TRIM40	-468.772	103.638	-11.1945	5.6283e-24	4.07211e-22	43.6385
IGLV1-50	-106.912	18.5423	-11.1893	5.85406e-24	4.23021e-22	43.5996
RHOF	-622.074	257.958	-11.1874	5.94162e-24	4.28818e-22	43.5849
PACSIN2	-5717.15	4683.67	-11.1813	6.22303e-24	4.48573e-22	43.539
RASD2	-1324.89	411.2	-11.1804	6.26404e-24	4.50972e-22	43.5325
DNER	-132.96	28.7846	-11.1774	6.40853e-24	4.60806e-22	43.5099
RP11-730A19.9	-16.9395	8.41538	-11.1722	6.66665e-24	4.78777e-22	43.4708
SLC8A3	-26.2592	9.16923	-11.1712	6.71838e-24	4.81899e-22	43.4631
PTPRR	-1570.57	520.831	-11.1646	7.061e-24	5.05854e-22	43.4138
LINC00891	-8.51742	2.06923	-11.1641	7.08861e-24	5.07209e-22	43.41
CLMN	-4678.74	2798.99	-11.1594	7.3473e-24	5.25076e-22	43.3744
MEP1A	-32086.5	7235.32	-11.1556	7.56278e-24	5.39814e-22	43.3458
CTD-3193O13.1	-7.96107	1.90385	-11.1506	7.85608e-24	5.60065e-22	43.3081
GPER1	-390.845	131.019	-11.1478	8.0237e-24	5.70883e-22	43.2872
CTNNA3	-130.041	23.9615	-11.1477	8.02738e-24	5.70883e-22	43.2867
ATP1B2	-161.15	48.6423	-11.1409	8.45264e-24	6.00395e-22	43.2356
OAF	-4931.86	3850.39	-11.1297	9.20348e-24	6.52932e-22	43.1512
ATP6V0D2	-196.39	67.2577	-11.1105	1.06471e-23	7.54435e-22	43.0069
HCN4	-10.707	3.07692	-11.0993	1.15872e-23	8.20054e-22	42.923
IGHJ3P	-62.5277	15.7577	-11.0971	1.17817e-23	8.32806e-22	42.9065
TMEM30B	-4477.71	3129.09	-11.0835	1.30649e-23	9.22394e-22	42.8041
NEDD4L	-4786.81	3143.7	-11.081	1.33128e-23	9.38759e-22	42.7855
AMICA1	-906.436	395.719	-11.0729	1.41572e-23	9.97101e-22	42.7246
MGAT4A	-4944.37	3266.71	-11.0606	1.55273e-23	1.09228e-21	42.633
EPB41L4A-AS2	-34.1045	14.1192	-11.0443	1.75721e-23	1.23464e-21	42.5105
IGHV3-21	-3154.64	806.054	-11.0425	1.78175e-23	1.25037e-21	42.4967
FCRL4	-33.4693	7.71538	-11.0317	1.93223e-23	1.35435e-21	42.4164
VILL	-7102.88	3167.53	-11.03	1.95842e-23	1.37106e-21	42.4031
REP15	-229.708	60.1154	-11.0267	2.00727e-23	1.40358e-21	42.3787
IGHV4-55	-337.61	78.1038	-11.0244	2.04213e-23	1.42624e-21	42.3616
PLSCR4	-1281.9	817.55	-11.0238	2.05159e-23	1.43114e-21	42.357
WARSP1	-2.74283	0.488462	-11.0232	2.06055e-23	1.43567e-21	42.3527
TCEAL6	-12.9713	2.07692	-11.0114	2.25323e-23	1.56805e-21	42.2641
CCDC152	-323.476	81.2423	-11.0008	2.44113e-23	1.69679e-21	42.1848
DUSP26	-68.4826	18.4192	-10.998	2.49388e-23	1.73139e-21	42.1636
KCNG3	-53.4498	13.0269	-10.9952	2.5461e-23	1.76555e-21	42.1431
FGFBP2	-55.209	11.9385	-10.9893	2.66229e-23	1.84393e-21	42.0989
RP11-371M22.1	-2.13012	0.188462	-10.9879	2.69079e-23	1.86146e-21	42.0883
CLCN2	-3279.6	1964.66	-10.9798	2.86094e-23	1.97683e-21	42.0276
GCSAML	-45.4436	13.1654	-10.9796	2.86546e-23	1.97761e-21	42.026
FAM161B	-242.733	171.392	-10.9773	2.91475e-23	2.00925e-21	42.0091
SPATA31C1	-2.86373	0.5	-10.9768	2.92628e-23	2.01438e-21	42.0052
S100B	-412.468	127.977	-10.9765	2.9325e-23	2.01438e-21	42.0031
GDNF	-185.816	57.6192	-10.9765	2.93254e-23	2.01438e-21	42.0031
HHIP	-676.87	230.846	-10.965	3.19783e-23	2.19403e-21	41.9173
SH2D6	-183.919	42.2115	-10.9569	3.39865e-23	2.32907e-21	41.857
NPY6R	-486.695	65.8808	-10.9542	3.46934e-23	2.37297e-21	41.8366
NR3C1	-1722.89	790.696	-10.9541	3.47084e-23	2.37297e-21	41.8361
SFTA1P	-32.9068	8.18077	-10.9486	3.61938e-23	2.47164e-21	41.7946
ELMSAN1	-2511.88	1943.39	-10.9475	3.64964e-23	2.48939e-21	41.7864
CNGA3	-148.252	20.7462	-10.9442	3.74046e-23	2.54836e-21	41.762
LRRC75A	-1796.28	1176.38	-10.944	3.74657e-23	2.54954e-21	41.7604
CNGA1	-469.186	170.062	-10.9323	4.09154e-23	2.78106e-21	41.6731
IGSF11	-43.2264	8.74615	-10.9312	4.12558e-23	2.80093e-21	41.6649
HEPACAM2	-3550.29	732.254	-10.9245	4.34053e-23	2.94345e-21	41.6146
CXCL12	-4665.97	1414.36	-10.9051	5.02129e-23	3.40114e-21	41.4703
SYNM	-19606.4	2668.39	-10.9019	5.14334e-23	3.47977e-21	41.4465
TCP11L1	-436.147	354.381	-10.8902	5.61852e-23	3.79685e-21	41.359
LINC01571	-5.8002	1.11923	-10.89	5.62627e-23	3.7977e-21	41.3576
NHSL1	-4023	2670.32	-10.882	5.97483e-23	4.02832e-21	41.2981
AC007556.3	-8.01434	1.35385	-10.8732	6.3841e-23	4.29929e-21	41.2324
RP11-479A21.1	-6.36578	1.33846	-10.8713	6.4749e-23	4.35541e-21	41.2185
ACSF2	-3434.03	1761.29	-10.8589	7.11244e-23	4.77876e-21	41.1254
MAPK3	-8462.71	6011.01	-10.8572	7.20308e-23	4.83409e-21	41.1129
SELENBP1	-56758.4	17257.1	-10.8556	7.2861e-23	4.88419e-21	41.1015
PPY	-9.11066	1.45	-10.8353	8.48807e-23	5.6834e-21	40.9503
C1orf186	-100.804	32.9615	-10.8343	8.55264e-23	5.72008e-21	40.9428
TJP3	-7216.41	4709.8	-10.8276	8.99318e-23	6.00783e-21	40.893
RPS15AP11	-26.3023	13.0038	-10.8267	9.05858e-23	6.04461e-21	40.8859
MIER1	-2737.2	2193.93	-10.8242	9.22677e-23	6.14981e-21	40.8676
RELN	-399.576	103.388	-10.8132	1.00218e-22	6.67208e-21	40.7858
TMEM127	-5778.84	5475.66	-10.8074	1.04686e-22	6.96163e-21	40.7426
AC104699.1	-27.6189	8.33077	-10.8058	1.05934e-22	7.02959e-21	40.7308
EGLN1	-2860.61	2631.74	-10.8058	1.05949e-22	7.02959e-21	40.7307
MBNL1-AS1	-769.121	221.335	-10.8015	1.09416e-22	7.25137e-21	40.6988
ANGPTL1	-857.749	161.973	-10.799	1.115e-22	7.38109e-21	40.6801
LXN	-1060	712.485	-10.7984	1.11993e-22	7.40533e-21	40.6757
FGFR2	-2808.9	913.646	-10.7973	1.12883e-22	7.45575e-21	40.6679
PPP1R16B	-883.5	381.119	-10.7969	1.13263e-22	7.47241e-21	40.6646
APOBEC3B	-1052.82	457.469	-10.7945	1.15283e-22	7.59709e-21	40.6471
HADHA	-13797.7	12177.6	-10.79	1.19318e-22	7.85415e-21	40.613
GGTA1P	-356.518	124.296	-10.7891	1.20127e-22	7.89852e-21	40.6063
MT1H	-2877.61	269.846	-10.7875	1.2152e-22	7.98108e-21	40.5949
METTL24	-106.468	22.1462	-10.7823	1.26414e-22	8.29316e-21	40.5558
IGHV3-11	-3597.74	836.85	-10.7788	1.2974e-22	8.50183e-21	40.5301
RP11-321G12.1	-297.18	65.8577	-10.773	1.35534e-22	8.87153e-21	40.4868
HNRNPA1P33	-11.6742	2.66923	-10.7604	1.48877e-22	9.73403e-21	40.3938
ASPG	-560.141	96.7038	-10.7514	1.59246e-22	1.04003e-20	40.3271
IGKV3D-7	-32.2182	4.82692	-10.7502	1.60693e-22	1.04831e-20	40.3181
PEX11A	-990.279	652.662	-10.7461	1.65756e-22	1.08014e-20	40.2874
FLT3	-65.2725	24.1192	-10.7405	1.72886e-22	1.12534e-20	40.2457
PPARD	-3885.51	2877.41	-10.7394	1.74309e-22	1.13334e-20	40.2376
TMEM59	-15126.1	13477.8	-10.7304	1.86363e-22	1.21036e-20	40.1714
MST1L	-172.036	43.4885	-10.7303	1.86579e-22	1.21042e-20	40.1702
ABCC8	-57.7705	15.2846	-10.7291	1.88245e-22	1.21987e-20	40.1614
STAB1	-4896.08	2159.16	-10.7236	1.96156e-22	1.26973e-20	40.1206
LINC01013	-20.085	5.58846	-10.7096	2.17742e-22	1.4079e-20	40.0172
LGALS2	-2303.22	391.769	-10.7072	2.2173e-22	1.43209e-20	39.9993
ITM2A	-986.232	355.335	-10.7057	2.24257e-22	1.44682e-20	39.988
NCOA4	-9133.36	8210.19	-10.7014	2.31617e-22	1.49265e-20	39.9561
PPP1R14A	-1095.15	319.119	-10.6932	2.46166e-22	1.58466e-20	39.8957
OSBPL1A	-1909.45	1062.06	-10.69	2.52178e-22	1.62158e-20	39.8718
WI2-2373I1.1	-2.08709	0.353846	-10.6782	2.7553e-22	1.76979e-20	39.7841
TMEM220	-1287.85	202.281	-10.6705	2.9176e-22	1.87198e-20	39.7275
RP11-425D10.10	-32.8975	14.8769	-10.6694	2.94056e-22	1.88464e-20	39.7197
HIGD1AP1	-5.7623	2.09231	-10.6693	2.94399e-22	1.88477e-20	39.7185
RXRA	-4911.22	3832.82	-10.6578	3.20779e-22	2.0514e-20	39.6336
IL16	-867.573	401.754	-10.6547	3.28298e-22	2.09719e-20	39.6106
C7	-5059.58	921.654	-10.6501	3.39683e-22	2.16755e-20	39.5768
IGKV1D-35	-7.05943	1.25	-10.6487	3.43241e-22	2.18786e-20	39.5665
IGSF3	-2063.57	1475.1	-10.648	3.45245e-22	2.19824e-20	39.5608
JOSD1	-4762.41	4009.35	-10.6453	3.52158e-22	2.23981e-20	39.5411
AQPEP	-58.1967	13.3846	-10.6435	3.56915e-22	2.26759e-20	39.5278
RP11-396O20.1	-15.6025	1.85769	-10.6423	3.6003e-22	2.2849e-20	39.5192
FXYD3	-47260	22953.7	-10.6387	3.698e-22	2.34435e-20	39.4927
IGHV3-22	-18.541	4.6	-10.6377	3.72713e-22	2.36026e-20	39.485
LDB3	-876.878	144.646	-10.6254	4.08616e-22	2.58482e-20	39.3939
SORCS1	-342.572	55.3846	-10.6238	4.13508e-22	2.61293e-20	39.3821
PTP4A1	-13028.4	9806.1	-10.6235	4.14404e-22	2.61577e-20	39.38
VDR	-7000.49	5262.06	-10.6166	4.36273e-22	2.75083e-20	39.329
KCTD9	-1670.92	1264.6	-10.6098	4.5879e-22	2.88969e-20	39.2792
BCHE	-667.843	93.6923	-10.6064	4.70658e-22	2.96124e-20	39.2539
SPECC1L	-1544.66	1304.64	-10.606	4.7213e-22	2.9673e-20	39.2508
CRADD	-390.993	356.881	-10.6049	4.76107e-22	2.98908e-20	39.2425
IGHV3-19	-75.2029	18.05	-10.6041	4.78694e-22	3.0021e-20	39.2371
KIAA1683	-447.742	130.062	-10.6024	4.8475e-22	3.03682e-20	39.2247
ATP8A2	-74.2152	31.2269	-10.5972	5.04179e-22	3.15515e-20	39.1858
HTR7	-53.7449	13.25	-10.5928	5.20755e-22	3.25539e-20	39.1538
SESN2	-1645.97	1123.76	-10.5903	5.306e-22	3.31338e-20	39.1352
FAM129A	-5217.24	1064.32	-10.583	5.60273e-22	3.49494e-20	39.0813
LINC01133	-1489.06	657.638	-10.5698	6.18101e-22	3.85156e-20	38.9841
XXyac-YM21GA2.3	-3.53484	0.307692	-10.5685	6.24214e-22	3.8855e-20	38.9743
AL117187.1	-3.39857	0.873077	-10.5629	6.50628e-22	4.0456e-20	38.9333
RP11-800A3.4	-536.877	245.912	-10.5571	6.79587e-22	4.22118e-20	38.8902
IGHV3OR16-16	-10.6773	2.29231	-10.5561	6.84259e-22	4.24568e-20	38.8834
ATG4D	-1290.98	1112.65	-10.5521	7.04984e-22	4.36963e-20	38.8538
HSPA2	-3136.21	987.723	-10.5428	7.55644e-22	4.67866e-20	38.7851
MICALCL	-320.768	181.096	-10.5365	7.9198e-22	4.89845e-20	38.7386
CAPN2	-15534.8	11549.6	-10.533	8.12641e-22	5.02092e-20	38.7131
RP11-442O1.3	-9.32275	3.68846	-10.5324	8.16573e-22	5.03988e-20	38.7083
RP11-1100L3.4	-7.39447	1.87308	-10.5319	8.19207e-22	5.0508e-20	38.7051
FRMD3	-1059.24	356.819	-10.5269	8.50735e-22	5.23965e-20	38.6678
TP53I3	-1968.12	1443.37	-10.5222	8.81016e-22	5.42043e-20	38.6331
SCAMP2	-9424.55	7617.3	-10.5118	9.51676e-22	5.849e-20	38.5567
MGST3	-4892.24	4493.69	-10.5035	1.01223e-21	6.2121e-20	38.4957
CHMP1B	-3541.77	2885.43	-10.5034	1.01288e-21	6.2121e-20	38.495
SCN7A	-1418.46	159.638	-10.4834	1.17466e-21	7.19676e-20	38.3483
RP11-131H24.4	-21.6465	5.12308	-10.4828	1.17971e-21	7.2201e-20	38.3441
IGHV2-5	-758.898	157.804	-10.4746	1.25444e-21	7.66944e-20	38.2833
RP11-725G5.2	-15.7264	5.30385	-10.4743	1.25684e-21	7.67605e-20	38.2814
CTA-150C2.13	-16.3781	3.69231	-10.4717	1.28102e-21	7.81559e-20	38.2625
ABCD3	-4092.59	3378.45	-10.4676	1.32074e-21	8.04948e-20	38.2323
DPP6	-577.252	57.3962	-10.4625	1.37193e-21	8.35278e-20	38.1946
AC245028.1	-6.92213	1.25385	-10.456	1.43949e-21	8.75496e-20	38.147
PROB1	-335.643	232.512	-10.4497	1.50874e-21	9.16658e-20	38.1005
PTK2B	-4163.91	2798.08	-10.4473	1.53572e-21	9.3208e-20	38.083
PPARGC1B	-1542.38	989.662	-10.4403	1.6172e-21	9.80512e-20	38.0318
AHNAK	-53292.4	28229.1	-10.4328	1.70976e-21	1.03556e-19	37.9767
FOLR2	-850.87	266.054	-10.4303	1.74171e-21	1.05382e-19	37.9584
RP13-497K6.1	-47.1988	7.08077	-10.4274	1.7798e-21	1.07575e-19	37.9369
CYB561A3	-1895.86	1703.56	-10.4263	1.79346e-21	1.08288e-19	37.9294
ZFYVE28	-956.095	605.304	-10.4206	1.87033e-21	1.12813e-19	37.8878
TRIM9	-215.619	60.15	-10.4174	1.91553e-21	1.1542e-19	37.8642
GNG3	-40.2275	16.1231	-10.4169	1.92241e-21	1.15715e-19	37.8606
PLD1	-2194.63	1494.98	-10.4144	1.9586e-21	1.17772e-19	37.8422
BTD	-918.472	711.862	-10.3969	2.22972e-21	1.33937e-19	37.7138
DPYSL5	-38.29	8.00385	-10.389	2.36461e-21	1.41894e-19	37.6557
KCNB1	-256.513	41.8346	-10.3861	2.41415e-21	1.44718e-19	37.6352
KCNN3	-684.856	208.227	-10.3807	2.5128e-21	1.50477e-19	37.5955
PIGR	-403007	135790	-10.3789	2.54659e-21	1.52344e-19	37.5823
CLDN5	-1222.74	379.627	-10.3708	2.70446e-21	1.61623e-19	37.5228
C10orf99	-9371.72	3772.38	-10.3692	2.73684e-21	1.63391e-19	37.511
LINC01537	-18.6363	5.32308	-10.3612	2.90314e-21	1.73142e-19	37.4526
ATP13A4	-239.615	64.6308	-10.3586	2.95874e-21	1.76277e-19	37.4338
CCL14	-112.801	44.2654	-10.3417	3.35272e-21	1.99547e-19	37.3101
TRPC7-AS1	-32.3822	11.6731	-10.3392	3.41396e-21	2.02985e-19	37.2921
KIF13B	-6857.96	4528.13	-10.3307	3.6364e-21	2.15991e-19	37.2297
CCL8	-296.392	86.0346	-10.33	3.65341e-21	2.1678e-19	37.225
EMP1	-15950.8	6558.2	-10.3259	3.76722e-21	2.23306e-19	37.1947
CAND2	-199.53	69.8115	-10.3231	3.84605e-21	2.27748e-19	37.1742
NACAD	-212.677	75.2231	-10.318	3.99324e-21	2.36224e-19	37.137
PARM1	-15756.5	8698.6	-10.2937	4.7742e-21	2.82137e-19	36.9602
LRRN4CL	-264.972	117.896	-10.2904	4.89371e-21	2.88907e-19	36.9357
MEIS3P1	-176.938	76.1385	-10.279	5.32052e-21	3.13787e-19	36.853
SNX24	-452.085	288.173	-10.2788	5.3281e-21	3.13917e-19	36.8515
RBPMS2	-907.102	180.969	-10.2579	6.21752e-21	3.6595e-19	36.6988
RNASEL	-896.155	661.681	-10.2546	6.36786e-21	3.74053e-19	36.6751
NOVA1	-217.821	56.3962	-10.2546	6.368e-21	3.74053e-19	36.6751
RP3-400B16.1	-16.8576	6.49231	-10.2544	6.37918e-21	3.74333e-19	36.6733
TCN2	-3040.12	1093.78	-10.2522	6.48036e-21	3.79889e-19	36.6578
RP11-160O5.1	-110.228	58.7423	-10.2471	6.72978e-21	3.94114e-19	36.6204
GNG12	-8398.95	6702.53	-10.2405	7.063e-21	4.13214e-19	36.5726
RP11-1036E20.9	-10.0543	2.12692	-10.2375	7.22357e-21	4.22185e-19	36.5503
IGKV1D-39	-139.01	21.4192	-10.2354	7.33494e-21	4.28265e-19	36.5352
CCL15-CCL14	-102.826	43.1269	-10.2331	7.45996e-21	4.35129e-19	36.5184
KIAA1644	-868.414	167.527	-10.2259	7.86309e-21	4.58186e-19	36.4664
SCGB2A1	-117.594	29.3923	-10.2236	7.99669e-21	4.65506e-19	36.4497
TRHDE	-393.707	119.396	-10.2183	8.31525e-21	4.83568e-19	36.411
AC073900.4	-4.05328	0.946154	-10.2149	8.52662e-21	4.94938e-19	36.3862
WISP2	-465.165	89.2731	-10.2149	8.52772e-21	4.94938e-19	36.3861
EPHX2	-5336.94	2330.05	-10.2133	8.62777e-21	5.00234e-19	36.3745
NMRK2	-4.56865	0.9	-10.2132	8.63611e-21	5.00234e-19	36.3736
HAND2	-1085.34	185.762	-10.2051	9.16085e-21	5.30104e-19	36.3152
SEC14L5	-108.985	29.0346	-10.2019	9.37765e-21	5.42112e-19	36.292
RP11-416N2.3	-2.62705	0.534615	-10.2018	9.3883e-21	5.42191e-19	36.2909
SLC35F1	-97.1855	30.3577	-10.1981	9.64874e-21	5.56681e-19	36.2638
HSPB6	-3401	694.854	-10.1934	9.98056e-21	5.75257e-19	36.2304
CTD-2135D7.5	-8.06762	2.30385	-10.1887	1.03381e-20	5.95276e-19	36.1955
CHODL	-142.013	29.5385	-10.1783	1.11521e-20	6.41516e-19	36.1205
PGM5	-4987.18	1015.97	-10.1774	1.12263e-20	6.45146e-19	36.114
PYGM	-552.56	92.8808	-10.1729	1.16013e-20	6.6604e-19	36.0814
HECTD3	-4267.42	3821	-10.1726	1.16264e-20	6.66827e-19	36.0793
TMEM131	-4553.05	4171.95	-10.1719	1.16895e-20	6.69788e-19	36.074
IGKV1D-33	-46.6219	7.43462	-10.1683	1.20061e-20	6.87254e-19	36.0475
PCDH10	-48.0758	11.2577	-10.1665	1.21603e-20	6.95401e-19	36.0349
SIGLEC11	-38.3904	13.5346	-10.1663	1.21799e-20	6.95842e-19	36.0333
ACTG2	-64821.3	10255.5	-10.1633	1.24471e-20	7.10411e-19	36.0118
GNAO1	-1595.52	291.85	-10.1585	1.28967e-20	7.35352e-19	35.9767
ECE1	-9999.64	7683.48	-10.1565	1.30845e-20	7.45334e-19	35.9624
CEND1	-42.1414	15.0769	-10.1476	1.39679e-20	7.94106e-19	35.8977
MYLK	-32827.1	7641.25	-10.1476	1.39679e-20	7.94106e-19	35.8977
CHL1-AS2	-7.63525	1.83462	-10.1456	1.41723e-20	8.04937e-19	35.8834
SLC25A42	-479.699	345.696	-10.1433	1.44128e-20	8.17802e-19	35.8667
IGKV2OR2-1	-20.1025	3.38462	-10.1427	1.44773e-20	8.20666e-19	35.8623
ADORA3	-344.647	117	-10.1327	1.55771e-20	8.82155e-19	35.7898
IGKV1-17	-2340.61	485.119	-10.1285	1.6058e-20	9.08504e-19	35.7597
SDPR	-2136	518.069	-10.1283	1.60878e-20	9.09311e-19	35.7579
CLCA1	-68895.1	13031.3	-10.1265	1.63012e-20	9.20481e-19	35.7449
NDN	-993.915	450.062	-10.1232	1.67012e-20	9.42156e-19	35.7209
BTBD3	-2479.91	1893.13	-10.1159	1.76127e-20	9.92619e-19	35.6683
PTPRF	-27299	21486.3	-10.1126	1.80497e-20	1.01627e-18	35.644
DDX60	-3528.08	1782.09	-10.1112	1.8228e-20	1.02531e-18	35.6343
IGHV3OR16-8	-77.1199	16.9385	-10.1046	1.91257e-20	1.07478e-18	35.5867
TMEM56	-2603.84	1455.4	-10.1036	1.9267e-20	1.08168e-18	35.5795
MYH11	-225174	30106.4	-10.1014	1.95869e-20	1.09858e-18	35.5632
MYZAP	-334.517	216.631	-10.101	1.96432e-20	1.10068e-18	35.5603
BCL2	-986.486	485.096	-10.0973	2.01739e-20	1.12933e-18	35.5339
ACAA1	-3349.39	2662.29	-10.0928	2.08593e-20	1.16658e-18	35.5009
LPCAT3	-1606.87	1078.64	-10.0853	2.20374e-20	1.23129e-18	35.4465
FLNC	-18793.1	3467.35	-10.0849	2.20987e-20	1.23354e-18	35.4438
AQP7	-561.966	175.804	-10.0828	2.24335e-20	1.25103e-18	35.4289
PEG3	-311.99	86.5846	-10.0767	2.34522e-20	1.30659e-18	35.385
DYRK2	-4065.77	3528.12	-10.0737	2.39802e-20	1.33473e-18	35.3629
INSL5	-357.753	36.7	-10.0707	2.45112e-20	1.36187e-18	35.3413
LANCL3	-247.913	118.531	-10.0707	2.45145e-20	1.36187e-18	35.3411
TRIM36	-807.887	428.204	-10.0674	2.51014e-20	1.39315e-18	35.3177
AC244250.2	-230.22	46.6346	-10.0624	2.60402e-20	1.44388e-18	35.2814
FCER1A	-124.225	37.6692	-10.06	2.64933e-20	1.46761e-18	35.2643
CROT	-1131.23	747.696	-10.0556	2.73668e-20	1.51456e-18	35.2322
CNN1	-22673.8	4022.15	-10.0524	2.8012e-20	1.5488e-18	35.2092
UG0898H09	-67.0502	13.8885	-10.0482	2.88845e-20	1.59554e-18	35.1788
PROKR1	-9.32787	2.49615	-10.0359	3.15989e-20	1.74383e-18	35.0899
CACNG7	-6.70082	1.71154	-10.0353	3.17266e-20	1.74922e-18	35.086
HAND2-AS1	-910.263	109.815	-10.0321	3.2469e-20	1.78846e-18	35.0631
CSRP1	-30046.3	12575.4	-10.0318	3.25544e-20	1.79147e-18	35.0605
PLA2G10	-293.34	123.712	-10.0295	3.30948e-20	1.8195e-18	35.0442
RP11-6O2.3	-168.61	36.2038	-10.0291	3.31889e-20	1.82295e-18	35.0414
PDGFD	-498.13	278.962	-10.0267	3.37723e-20	1.85325e-18	35.0241
RP11-350G8.5	-10.0615	3.80769	-10.0255	3.40728e-20	1.86799e-18	35.0154
ARRB1	-2139.48	1682.93	-10.0209	3.52417e-20	1.93026e-18	34.982
KIRREL3	-69.3084	24.2692	-10.0171	3.62292e-20	1.98249e-18	34.9547
TMOD1	-388.489	99.4808	-10.0129	3.7346e-20	2.04169e-18	34.9246
MFAP4	-6605.04	2262.11	-10.006	3.92808e-20	2.14545e-18	34.8746
LGR4	-4766.32	3656.37	-10.0017	4.05327e-20	2.21176e-18	34.8436
RASGEF1C	-42.6855	8.75385	-9.99606	4.223e-20	2.30222e-18	34.803
GOLM1	-19198.2	13337.3	-9.99524	4.24825e-20	2.31383e-18	34.7971
IGHV3-74	-4555.84	1038.71	-9.99477	4.26277e-20	2.31957e-18	34.7937
STPG1	-638.485	509.619	-9.98018	4.74042e-20	2.57709e-18	34.6887
KBTBD11	-2539.73	1582.87	-9.97989	4.75018e-20	2.57999e-18	34.6866
PYY2	-16.8371	7.76154	-9.97674	4.86025e-20	2.63732e-18	34.664
KRT27	-4.76844	0.9	-9.97631	4.87558e-20	2.64318e-18	34.6609
SLC2A4	-742.444	215.808	-9.97603	4.88565e-20	2.64618e-18	34.6588
CYSLTR1	-156.876	74.4654	-9.97543	4.90694e-20	2.65525e-18	34.6545
MFSD4	-1933.99	651.527	-9.96848	5.16124e-20	2.79027e-18	34.6045
SUSD6	-4512.65	3460.05	-9.96809	5.17584e-20	2.79558e-18	34.6017
IGKV1-16	-2089.15	511.915	-9.96378	5.3407e-20	2.88195e-18	34.5707
PPP1R14D	-3272.9	1867.07	-9.9629	5.3747e-20	2.89763e-18	34.5644
C1QTNF7	-307.831	86.05	-9.95795	5.5717e-20	3.00106e-18	34.5288
AVPI1	-1651.97	1242.88	-9.95732	5.59711e-20	3.01197e-18	34.5243
CTD-2022H16.2	-2.6373	0.4	-9.95718	5.60316e-20	3.01245e-18	34.5233
RAP1A	-2911.1	2948.8	-9.95452	5.71235e-20	3.06833e-18	34.5042
RP11-756A22.7	-28.1373	9.21923	-9.95348	5.7555e-20	3.08866e-18	34.4967
DCLK1	-419.689	123.888	-9.95317	5.7686e-20	3.09285e-18	34.4945
FZD5	-4914.26	4257.03	-9.93746	6.4657e-20	3.46342e-18	34.3816
SLC6A9	-1540.48	895.065	-9.93427	6.61706e-20	3.54125e-18	34.3587
ELAVL4	-122.526	26.0769	-9.93192	6.73109e-20	3.59898e-18	34.3418
MTM1	-1552.43	1127.04	-9.92313	7.17465e-20	3.83263e-18	34.2787
CTC-558O2.1	-41.6855	12.1923	-9.92147	7.26121e-20	3.87532e-18	34.2668
RHBDL2	-1013.23	457	-9.91772	7.46177e-20	3.97873e-18	34.2399
NLGN1	-86.2182	16.15	-9.90863	7.97042e-20	4.24606e-18	34.1746
ARPP21	-16.3125	2.75385	-9.9064	8.10009e-20	4.31121e-18	34.1587
BDKRB2	-1578.91	921.319	-9.89845	8.5808e-20	4.56291e-18	34.1017
SETBP1	-710.823	294.858	-9.88877	9.204e-20	4.88985e-18	34.0323
PDXP	-122.948	70.4308	-9.8874	9.29605e-20	4.93426e-18	34.0225
SMPD3	-3688.3	1993.49	-9.8854	9.4313e-20	5.0015e-18	34.0082
KBTBD11-OT1	-57.6906	26.4846	-9.88387	9.53643e-20	5.05266e-18	33.9972
CKMT1A	-1027.1	647.173	-9.88191	9.67319e-20	5.12047e-18	33.9831
PDZRN4	-532.326	89.0577	-9.87913	9.86983e-20	5.21983e-18	33.9632
CCDC13	-33.6834	18.0769	-9.86779	1.0714e-19	5.65972e-18	33.882
RP11-779O18.3	-3.5748	1.20769	-9.8677	1.0721e-19	5.65972e-18	33.8814
SHISA3	-285.969	72.0038	-9.86225	1.1152e-19	5.88197e-18	33.8424
ADRA2A	-1985.49	660.696	-9.86033	1.13082e-19	5.95896e-18	33.8286
CCNJL	-1164.49	478.8	-9.85409	1.18307e-19	6.22865e-18	33.784
RAVER2	-2797.75	2235.48	-9.85299	1.19249e-19	6.27259e-18	33.7761
RP11-285G1.9	-13.5133	3.13077	-9.84753	1.24057e-19	6.51961e-18	33.737
IGHV1OR16-1	-19.3545	4.21154	-9.84679	1.24725e-19	6.54883e-18	33.7317
PIK3CG	-364.387	162.162	-9.84293	1.28253e-19	6.72803e-18	33.7041
KIAA0125	-260.699	84.9692	-9.83997	1.31028e-19	6.86745e-18	33.683
SCN3A	-95.4508	37.6731	-9.83936	1.31601e-19	6.89127e-18	33.6786
IGHV3-52	-73.7592	16.3423	-9.83805	1.32856e-19	6.95077e-18	33.6693
TTC38	-6560.27	4457.93	-9.83511	1.35706e-19	7.0935e-18	33.6483
PGM5P4	-18.4283	3.33077	-9.83464	1.36168e-19	7.1113e-18	33.6449
CPTP	-2266.28	1772.75	-9.83414	1.3666e-19	7.1306e-18	33.6413
GPRIN2	-763.836	376.169	-9.83258	1.38215e-19	7.20534e-18	33.6301
ABCD2	-69.8832	29.2923	-9.8303	1.40507e-19	7.31829e-18	33.6139
IGKV3OR22-2	-5.47336	0.988462	-9.82675	1.44162e-19	7.50192e-18	33.5885
CASD1	-1293.47	1019.75	-9.82423	1.46813e-19	7.63309e-18	33.5705
IGHV4-34	-1784.95	547.265	-9.82383	1.47233e-19	7.64813e-18	33.5676
LINC01475	-25.3248	6.29615	-9.82366	1.47415e-19	7.65078e-18	33.5664
TMEM54	-13032.7	8714.27	-9.82077	1.50526e-19	7.8053e-18	33.5457
SYNPO2	-24188.7	4192.95	-9.81266	1.59605e-19	8.26873e-18	33.4878
GNA13	-3589.66	3443	-9.80418	1.69676e-19	8.78267e-18	33.4273
NWD2	-120.351	25.7423	-9.79962	1.75353e-19	9.06848e-18	33.3948
SYNE3	-601.492	330.523	-9.79629	1.79624e-19	9.28114e-18	33.371
ARHGEF18	-758.369	571.8	-9.79453	1.81922e-19	9.39156e-18	33.3584
IGHV3-35	-99.8105	21.2692	-9.79269	1.8435e-19	9.50854e-18	33.3453
BCL2L11	-1482.04	1244.42	-9.78706	1.91988e-19	9.89374e-18	33.3051
CCBE1	-525.565	92.9654	-9.78434	1.95797e-19	1.00811e-17	33.2857
RP11-296O14.3	-48.9857	28.4038	-9.77865	2.03992e-19	1.04938e-17	33.2451
PCSK7	-2804.28	2448.54	-9.77338	2.11895e-19	1.08908e-17	33.2075
IGHV4OR15-8	-12.7049	2.82692	-9.77093	2.15669e-19	1.1075e-17	33.1901
SCP2	-7232.15	6594.47	-9.76971	2.17564e-19	1.11625e-17	33.1814
RNF112	-104.91	36.2962	-9.7634	2.27689e-19	1.16717e-17	33.1365
FOSL2	-9559.08	7315.79	-9.75847	2.35913e-19	1.20827e-17	33.1014
IGHV3-23	-8637.76	2406.23	-9.75383	2.43932e-19	1.24824e-17	33.0683
GINM1	-1448.04	1516.57	-9.74825	2.53937e-19	1.2983e-17	33.0286
SLC9A3R1	-9242.38	5612.13	-9.74278	2.64145e-19	1.34931e-17	32.9896
SYT4	-80.8197	15.6538	-9.73854	2.72317e-19	1.38984e-17	32.9595
MIR143	-16.4078	3.22692	-9.73705	2.75254e-19	1.4036e-17	32.9488
HLF	-429.128	146.592	-9.7358	2.77743e-19	1.41506e-17	32.9399
SLC1A1	-3369.16	1066.92	-9.72655	2.96852e-19	1.5111e-17	32.8741
SNTG2	-14.7182	4.25	-9.72381	3.0276e-19	1.53983e-17	32.8547
RP11-334E6.3	-2.83607	0.588462	-9.71815	3.15338e-19	1.6024e-17	32.8144
SCNN1G	-503.826	61.3038	-9.71626	3.19651e-19	1.62291e-17	32.801
RBFOX3	-600.022	76.7154	-9.71576	3.2081e-19	1.62738e-17	32.7974
CHGB	-799.585	149.308	-9.71212	3.29299e-19	1.66899e-17	32.7716
FRMD1	-1338.72	576.785	-9.70597	3.4419e-19	1.74295e-17	32.7278
TCEA3	-4968.27	2848.47	-9.70534	3.45755e-19	1.74898e-17	32.7233
PQLC1	-2664.23	1966.78	-9.70525	3.45979e-19	1.74898e-17	32.7227
BLOC1S5-TXNDC5	-12.1639	5.83462	-9.70077	3.57282e-19	1.803e-17	32.6909
IGKV3-7	-264.553	66.9769	-9.70077	3.57284e-19	1.803e-17	32.6909
OCEL1	-915.031	605.654	-9.69539	3.71368e-19	1.87246e-17	32.6527
B3GALT5-AS1	-431.908	53.5462	-9.68443	4.01774e-19	2.02311e-17	32.5749
TMEM108	-58.124	26.7654	-9.68437	4.0194e-19	2.02311e-17	32.5745
VPS4B	-3131.7	2960.58	-9.67985	4.15214e-19	2.08812e-17	32.5423
IGLV2-34	-46.9344	10.2038	-9.67903	4.17639e-19	2.09851e-17	32.5366
MAN1A1	-4846.21	3195.39	-9.6773	4.22877e-19	2.123e-17	32.5242
MBOAT1	-896.504	628.915	-9.67427	4.32163e-19	2.16776e-17	32.5028
ADAMTSL3	-809.46	189.415	-9.67346	4.34685e-19	2.17854e-17	32.497
MYL6	-31665	32962.9	-9.6701	4.45293e-19	2.22806e-17	32.4732
PRADC1	-936.258	816.858	-9.67009	4.4533e-19	2.22806e-17	32.4731
AC246787.4	-21.0154	5.96538	-9.66985	4.46094e-19	2.22998e-17	32.4714
HADH	-6232.34	5001.25	-9.66895	4.4898e-19	2.24248e-17	32.465
TNFRSF1A	-5440.59	5275.53	-9.66748	4.5373e-19	2.26427e-17	32.4546
CDKN1A	-12159.9	7023.56	-9.66471	4.62826e-19	2.30769e-17	32.435
IGHV6-1	-295.236	54.3077	-9.64796	5.21884e-19	2.59994e-17	32.3162
MYO1D	-29236.2	21158.6	-9.64537	5.31668e-19	2.64642e-17	32.2979
IGHV4-59	-4296.87	1119.87	-9.64327	5.39735e-19	2.68429e-17	32.283
MRGPRF-AS1	-10.5553	2.96923	-9.64122	5.47721e-19	2.72168e-17	32.2685
STX12	-2058	2199.77	-9.64016	5.51908e-19	2.74016e-17	32.2609
RP11-554D14.4	-9.25205	2.44231	-9.63968	5.53811e-19	2.74727e-17	32.2575
RP11-406A20.1	-2.1875	0.384615	-9.63756	5.62267e-19	2.78685e-17	32.2425
CD48	-757.811	364.573	-9.62703	6.06309e-19	3.00259e-17	32.168
PLXNA2	-4393.04	3198.18	-9.62638	6.09152e-19	3.01411e-17	32.1634
ACAT1	-4142.96	2834.62	-9.6244	6.17815e-19	3.05439e-17	32.1494
CAV1	-5698.63	2096.05	-9.62395	6.19826e-19	3.06174e-17	32.1462
LMOD1	-10330.1	2045.21	-9.6175	6.49083e-19	3.20355e-17	32.1006
GRIN3A	-107.805	48.4538	-9.61713	6.50804e-19	3.20933e-17	32.098
KIF5A	-298.339	90.2077	-9.6078	6.95769e-19	3.42818e-17	32.0319
RPL10L	-50.79	15.5231	-9.60264	7.21926e-19	3.55405e-17	31.9954
FAM46B	-366.892	91.3731	-9.60007	7.35278e-19	3.61674e-17	31.9773
SLC35D1	-4647.35	3355.27	-9.59685	7.52443e-19	3.69805e-17	31.9545
PPM1A	-2832.95	2824.57	-9.59506	7.62094e-19	3.74233e-17	31.9419
CHCHD10	-3409.85	2427.3	-9.59252	7.76096e-19	3.80789e-17	31.9239
HAND1	-600.051	89.5	-9.59122	7.83297e-19	3.84e-17	31.9148
SLC27A6	-48.6496	9.46923	-9.58311	8.30075e-19	4.06591e-17	31.8574
RP11-475B2.1	-6.36783	1.21154	-9.58289	8.31367e-19	4.06882e-17	31.8559
MARCKS	-10264.6	9240.83	-9.57957	8.51339e-19	4.16307e-17	31.8324
NDRG1	-36410.8	18370	-9.57562	8.75659e-19	4.27842e-17	31.8046
TMEM45B	-9337.66	6881.28	-9.57231	8.96608e-19	4.37711e-17	31.7812
ATL1	-350.744	263.215	-9.57	9.11533e-19	4.44625e-17	31.7649
RP11-320N21.2	-18.0072	4.28846	-9.56917	9.16922e-19	4.46881e-17	31.759
RP11-867G23.10	-72.4385	15.7692	-9.56897	9.18252e-19	4.47156e-17	31.7576
PDE5A	-2812.92	1243.37	-9.56649	9.34651e-19	4.54762e-17	31.7401
PER1	-3180.18	1320.46	-9.56122	9.7048e-19	4.71802e-17	31.7029
CYS1	-356.727	131.85	-9.55565	1.00984e-18	4.90527e-17	31.6636
PLD5	-14.8822	2.84615	-9.55027	1.04936e-18	5.09303e-17	31.6257
MIR497HG	-49.2213	20.8077	-9.54993	1.05193e-18	5.10126e-17	31.6233
MIXL1	-40.1189	13.85	-9.54338	1.1022e-18	5.34059e-17	31.5771
BSG	-45524.7	37896.7	-9.54195	1.1135e-18	5.39087e-17	31.567
LTK	-905.243	299.277	-9.52878	1.22307e-18	5.91642e-17	31.4742
VWA5A	-3689.78	1997.72	-9.52805	1.22946e-18	5.94243e-17	31.4691
GYPC	-803.869	393.6	-9.52554	1.25171e-18	6.04496e-17	31.4514
XDH	-4531.32	1370.59	-9.52535	1.25336e-18	6.04791e-17	31.4501
IGHJ2P	-3.85963	0.815385	-9.51947	1.307e-18	6.30154e-17	31.4086
RGMA	-1431.16	443.723	-9.51617	1.33804e-18	6.4459e-17	31.3854
BEND5	-86.9057	30.9423	-9.51566	1.34296e-18	6.46428e-17	31.3818
VLDLR-AS1	-43.2941	14.3077	-9.51445	1.35458e-18	6.51483e-17	31.3733
SLC22A17	-597.071	250.485	-9.51261	1.37246e-18	6.59536e-17	31.3603
PTPRZ1	-157.407	31.8423	-9.51175	1.38082e-18	6.62836e-17	31.3543
ZC3H12C	-971.303	557.469	-9.51167	1.38159e-18	6.62836e-17	31.3538
AC099539.1	-2.40779	0.615385	-9.51017	1.3965e-18	6.69438e-17	31.3432
PSMD10P2	-40.4785	15.2	-9.50783	1.41996e-18	6.80125e-17	31.3267
IGHV4-28	-644.024	151.546	-9.50619	1.43661e-18	6.87537e-17	31.3152
NAT2	-638.649	282.965	-9.50131	1.48736e-18	7.1124e-17	31.2809
IGHV1OR16-4	-3.17828	0.642308	-9.49927	1.50916e-18	7.21074e-17	31.2665
GCOM1	-99.3197	52.5423	-9.49717	1.53186e-18	7.31324e-17	31.2517
ATP2B1	-3489.78	3016.29	-9.48828	1.63185e-18	7.7842e-17	31.1892
MYL9	-54247.1	12400.4	-9.48288	1.69578e-18	8.08259e-17	31.1512
RNF150	-1221.08	243.373	-9.4825	1.70037e-18	8.09782e-17	31.1486
RIC3	-92.6926	24.0115	-9.48038	1.72616e-18	8.21397e-17	31.1337
CFL2	-1846.22	642.142	-9.47441	1.80095e-18	8.56285e-17	31.0918
MPP2	-217.549	86.3385	-9.47075	1.8484e-18	8.78131e-17	31.0661
RNF125	-829.237	451.481	-9.4696	1.86364e-18	8.84654e-17	31.0579
RP11-583F24.7	-1.83914	0.211538	-9.45637	2.04717e-18	9.70982e-17	30.9651
SPHKAP	-15.3811	2.06538	-9.44425	2.23117e-18	1.0574e-16	30.88
ADRA1A	-19.3863	5.11923	-9.44097	2.2837e-18	1.08142e-16	30.857
BVES	-436.749	123.815	-9.43194	2.43474e-18	1.152e-16	30.7937
MORN5	-139.8	17.6154	-9.43125	2.44678e-18	1.15676e-16	30.7889
MYT1L	-17.9416	3.1	-9.43005	2.46759e-18	1.16566e-16	30.7805
MAST3	-1444.87	1211.1	-9.42406	2.57462e-18	1.21523e-16	30.7385
ZSWIM6	-1048.58	952.888	-9.42078	2.63533e-18	1.24289e-16	30.7155
TSHZ1	-1870.81	1453.13	-9.4205	2.6404e-18	1.24427e-16	30.7136
RP11-733O18.1	-15.8924	5.27308	-9.41585	2.72891e-18	1.28494e-16	30.681
ATP5A1	-23478.5	20238	-9.40282	2.9929e-18	1.40811e-16	30.5897
GPM6A	-689.61	97.5154	-9.39739	3.11015e-18	1.4621e-16	30.5518
GRIK5	-287.498	68.5692	-9.39623	3.13583e-18	1.47298e-16	30.5436
IGKV3OR2-5	-12.1281	1.68077	-9.39605	3.13989e-18	1.4737e-16	30.5424
KCNMA1	-4010.89	922.496	-9.3937	3.19258e-18	1.49723e-16	30.5259
IL10RB	-2603.28	2354.11	-9.3922	3.22647e-18	1.51191e-16	30.5155
IGLV2-28	-43.2551	10.4692	-9.39197	3.23173e-18	1.51316e-16	30.5139
RP11-640L9.1	-14.749	4.59615	-9.3854	3.38557e-18	1.58392e-16	30.4679
IGLC4	-2.29918	0.342308	-9.37478	3.64976e-18	1.70615e-16	30.3937
TRPC7	-20.8648	6.66923	-9.37365	3.67899e-18	1.71844e-16	30.3858
PAQR8	-7812.57	4316.7	-9.37285	3.69987e-18	1.72681e-16	30.3802
CASQ2	-1081.31	187.042	-9.37152	3.73486e-18	1.74175e-16	30.3709
TMEM255A	-139.782	50.5077	-9.36995	3.77663e-18	1.75851e-16	30.3599
ARSA	-2481.66	1893.99	-9.36994	3.77682e-18	1.75851e-16	30.3598
AGFG2	-2835.87	2136.64	-9.36924	3.79563e-18	1.76586e-16	30.3549
ITIH5	-2674.69	1089.4	-9.36827	3.82165e-18	1.77655e-16	30.3482
SLITRK2	-28.5102	6.61923	-9.36324	3.9601e-18	1.83945e-16	30.313
RP11-249C24.11	-3.20184	0.307692	-9.36289	3.96977e-18	1.84247e-16	30.3106
TAGLN3	-85.4559	15.8654	-9.36229	3.98668e-18	1.84885e-16	30.3064
FLJ41941	-10.9262	1.99615	-9.3606	4.03466e-18	1.86962e-16	30.2946
CTD-2231E14.4	-1.43443	0.153846	-9.36049	4.03786e-18	1.86962e-16	30.2938
TPSG1	-936.041	252.812	-9.35608	4.16546e-18	1.92717e-16	30.263
ADAMTS1	-4292.28	1399.73	-9.35509	4.1949e-18	1.93925e-16	30.2561
ABCA9	-259.885	71.6077	-9.35428	4.21882e-18	1.94877e-16	30.2505
SPINT1	-13828.9	11504.2	-9.34878	4.38593e-18	2.02436e-16	30.2121
CD27	-399.754	169.096	-9.34692	4.44407e-18	2.04957e-16	30.1991
IGKV1D-37	-5.16393	0.903846	-9.34508	4.50224e-18	2.07476e-16	30.1862
RP11-307N16.7	-13.2059	2.66923	-9.34413	4.53254e-18	2.08708e-16	30.1796
PCDH11Y	-5.99078	0.815385	-9.33798	4.73347e-18	2.17788e-16	30.1367
OGN	-1504.7	298.585	-9.33757	4.74727e-18	2.18251e-16	30.1339
HERPUD1	-4727.11	5001.73	-9.33733	4.75532e-18	2.18449e-16	30.1322
FAS	-1064.02	721.146	-9.33166	4.94954e-18	2.27193e-16	30.0926
PNCK	-578.945	111.808	-9.32983	5.01371e-18	2.29957e-16	30.0799
MIA2	-39.2971	8.49615	-9.32334	5.24861e-18	2.40542e-16	30.0346
NEDD9	-4816.81	3226.79	-9.32112	5.33176e-18	2.44161e-16	30.0191
IGLV2-33	-34.1629	6.62692	-9.31262	5.66083e-18	2.58862e-16	29.9599
C3orf70	-812.614	476.831	-9.3126	5.66166e-18	2.58862e-16	29.9598
RP11-69G7.1	-5.78074	0.95	-9.31197	5.68675e-18	2.59806e-16	29.9554
OTUD7A	-200.964	103.965	-9.31184	5.6923e-18	2.59857e-16	29.9545
RP11-440I14.2	-15.8402	5.63462	-9.30541	5.95624e-18	2.71693e-16	29.9097
DNAJB5	-896.347	294.5	-9.29673	6.33167e-18	2.88593e-16	29.8493
REEP2	-241.373	83.2308	-9.29603	6.36297e-18	2.89793e-16	29.8444
NGB	-59.7275	7.07308	-9.29525	6.39792e-18	2.91158e-16	29.839
LINC00582	-14.9877	4.93462	-9.29372	6.46735e-18	2.94088e-16	29.8283
PIP5K1B	-2922.7	2405.47	-9.29291	6.50448e-18	2.95546e-16	29.8227
SOWAHB	-934.425	679.765	-9.29146	6.5711e-18	2.98341e-16	29.8126
MPP5	-1807.28	1669.81	-9.28586	6.83556e-18	3.10107e-16	29.7736
MVP	-22490.4	20523.3	-9.28142	7.05223e-18	3.19688e-16	29.7428
CD101	-187.266	104.758	-9.27887	7.18029e-18	3.25241e-16	29.725
LIMS2	-3305.51	1049.15	-9.27803	7.22286e-18	3.26916e-16	29.7192
MEI1	-260.883	115.546	-9.27634	7.30893e-18	3.30555e-16	29.7075
AF001548.6	-49.6988	7.73462	-9.27579	7.33725e-18	3.31579e-16	29.7036
CTC-490G23.2	-232.083	42.7615	-9.27284	7.4915e-18	3.38288e-16	29.6831
VAMP2	-2300.77	1679.31	-9.26731	7.78834e-18	3.5142e-16	29.6447
TMEM132D	-26.0615	8.54231	-9.26029	8.18286e-18	3.68937e-16	29.5959
CTD-2562J17.6	-818.404	489.085	-9.25803	8.31394e-18	3.74557e-16	29.5802
PLN	-2373.83	532.631	-9.25663	8.39599e-18	3.77962e-16	29.5705
MAPK10	-219.105	91.2538	-9.25315	8.60405e-18	3.86964e-16	29.5463
KIF1C	-10313	9159.15	-9.25306	8.60921e-18	3.86964e-16	29.5457
MYH15	-170.609	83.0154	-9.25071	8.75263e-18	3.93107e-16	29.5294
LRRC4B	-78.3689	43.9538	-9.25023	8.78205e-18	3.94126e-16	29.5261
CD79A	-1684.21	500.75	-9.24753	8.95061e-18	4.01382e-16	29.5073
LINC00483	-1226.64	649.162	-9.24293	9.24466e-18	4.1425e-16	29.4753
KB-1410C5.3	-3.01742	0.480769	-9.23216	9.97066e-18	4.4644e-16	29.4006
AF131217.1	-39.8238	11.3769	-9.22945	1.01623e-17	4.54671e-16	29.3818
MEIS3P2	-17.8863	9.02692	-9.22234	1.06825e-17	4.7758e-16	29.3325
SHE	-355.281	176.708	-9.21958	1.08912e-17	4.86539e-16	29.3134
XXyac-YM21GA2.4	-11.3494	2.66154	-9.21905	1.09315e-17	4.87963e-16	29.3098
MAB21L2	-2857.97	642.281	-9.21809	1.10052e-17	4.90881e-16	29.3031
RP11-245G13.2	-36.4426	5.55	-9.21797	1.10148e-17	4.90932e-16	29.3023
SIGLEC8	-142.278	40.4154	-9.21615	1.11565e-17	4.96866e-16	29.2896
ANKS1B	-75.0861	17.0346	-9.21507	1.12411e-17	5.00255e-16	29.2822
LINC00402	-18.5943	5.3	-9.2112	1.15504e-17	5.13627e-16	29.2554
NPAS4	-27.1137	5.74231	-9.20697	1.18985e-17	5.28704e-16	29.226
IGLV2-8	-3214.29	700.762	-9.20579	1.19968e-17	5.32668e-16	29.2179
EHHADH	-1474.29	1035.38	-9.20293	1.224e-17	5.43053e-16	29.1981
PNOC	-69.9109	25.7038	-9.20175	1.23417e-17	5.47149e-16	29.1899
CAPN13	-1222.69	509.238	-9.20036	1.24622e-17	5.52072e-16	29.1803
CPED1	-1432.34	500.115	-9.1962	1.28315e-17	5.68001e-16	29.1514
AC012507.3	-4.73566	1.43077	-9.19347	1.30788e-17	5.78509e-16	29.1326
KCNB2	-10.5205	3.37692	-9.19151	1.32596e-17	5.86061e-16	29.119
FRMD4B	-1009.45	826.546	-9.19083	1.33236e-17	5.88446e-16	29.1143
FAM214A	-1027.35	854.369	-9.18886	1.35084e-17	5.96156e-16	29.1007
RNF11	-2257.59	2462.15	-9.18426	1.3951e-17	6.15226e-16	29.0688
ZNF229	-66.6998	25.3423	-9.18183	1.41899e-17	6.25288e-16	29.052
SEMA4G	-4023.2	2912.69	-9.17959	1.44145e-17	6.34707e-16	29.0365
LETM1	-4650.76	3960.75	-9.17546	1.48368e-17	6.52806e-16	29.008
LRMP	-621.626	179.315	-9.16812	1.56192e-17	6.86717e-16	28.9572
ITGB7	-472.332	218.985	-9.16707	1.57345e-17	6.91266e-16	28.95
RCSD1	-706.578	399.154	-9.16533	1.59274e-17	6.99215e-16	28.9379
EPHA5	-22.1947	5.29615	-9.16066	1.64562e-17	7.21886e-16	28.9057
TP73-AS1	-173.102	90.7692	-9.15196	1.74887e-17	7.666e-16	28.8456
C1QL1	-52.3883	25.5231	-9.15083	1.76273e-17	7.72095e-16	28.8378
VWA3B	-72.8422	30.2654	-9.1487	1.78908e-17	7.83053e-16	28.8231
BVES-AS1	-17.2059	3.91538	-9.14859	1.79056e-17	7.83113e-16	28.8223
FENDRR	-1511.24	602.138	-9.14362	1.85383e-17	8.10174e-16	28.788
RP11-167N24.6	-12.6168	2.03462	-9.14248	1.8686e-17	8.16022e-16	28.7802
CACFD1	-2702.43	2199.18	-9.14172	1.87861e-17	8.19777e-16	28.7749
FAM189A1	-685.543	230.769	-9.14131	1.88392e-17	8.21484e-16	28.7721
IGHV1-2	-3625.38	871.904	-9.13953	1.90758e-17	8.31178e-16	28.7598
SMYD1	-344.972	43.0692	-9.13103	2.02416e-17	8.81316e-16	28.7012
GAP43	-211.399	54.6731	-9.13059	2.03047e-17	8.83408e-16	28.6981
NBPF25P	-57.8217	46.6115	-9.13047	2.03212e-17	8.83465e-16	28.6973
EML1	-1317.14	455.412	-9.12652	2.08901e-17	9.07521e-16	28.67
MRGPRF	-1885.35	543.05	-9.12484	2.11358e-17	9.17512e-16	28.6585
CTC-436P18.3	-42.3883	12.9077	-9.1246	2.11715e-17	9.18381e-16	28.6568
ROPN1	-20.5482	3.40385	-9.12151	2.16339e-17	9.37741e-16	28.6355
2021-03-02	-899.953	904.054	-9.12043	2.17965e-17	9.43933e-16	28.6281
CTD-3157E16.1	-96.2797	48.7077	-9.12035	2.18091e-17	9.43933e-16	28.6275
SOS2	-1993.76	1863.75	-9.11841	2.21065e-17	9.56097e-16	28.6141
KCNK10	-237.44	87.4846	-9.11675	2.23637e-17	9.66504e-16	28.6027
RP11-536C5.2	-5.39549	1.81154	-9.11579	2.2515e-17	9.72326e-16	28.596
FAM162A	-3621.86	3245.46	-9.11316	2.2931e-17	9.89556e-16	28.578
ANKRD53	-29.1301	14.1	-9.11083	2.33064e-17	1.00502e-15	28.5619
RP11-182J1.1	-5.09324	1.90769	-9.10979	2.3477e-17	1.01162e-15	28.5547
RP11-345K9.2	-2.60246	0.557692	-9.10933	2.35522e-17	1.01412e-15	28.5516
KRTAP13-2	-289.849	20.3	-9.10802	2.37682e-17	1.02266e-15	28.5425
SYNC	-243.004	106.95	-9.10501	2.42733e-17	1.04363e-15	28.5218
RP11-885N19.6	-5.02664	1.15769	-9.10067	2.50192e-17	1.07491e-15	28.4919
IGHV3-48	-994.727	258.612	-9.09837	2.5422e-17	1.09141e-15	28.4761
AC009014.3	-549.317	176.05	-9.09493	2.60402e-17	1.11713e-15	28.4524
SLC30A4	-846.67	431.808	-9.08815	2.72989e-17	1.17026e-15	28.4058
RAB6B	-428.12	208.788	-9.07991	2.89126e-17	1.23853e-15	28.349
FRMPD4	-67.3289	8.62692	-9.07828	2.92433e-17	1.25178e-15	28.3378
ACSS2	-8857	7443.04	-9.0739	3.01469e-17	1.28951e-15	28.3078
CNTN1	-377.922	83.5846	-9.07229	3.04879e-17	1.30315e-15	28.2966
RP11-598D12.1	-3.4457	0.703846	-9.06776	3.14638e-17	1.34387e-15	28.2655
IGKV3D-15	-236.127	61.1538	-9.06565	3.19293e-17	1.36276e-15	28.251
SERINC2	-15391	11382.4	-9.06328	3.24614e-17	1.38446e-15	28.2347
CAB39	-4585.39	5336.85	-9.06169	3.28207e-17	1.39876e-15	28.2238
ZNF835	-35.7674	15.2462	-9.05241	3.50101e-17	1.49098e-15	28.1601
TRPM4	-8409.37	5652.88	-9.04567	3.66897e-17	1.56137e-15	28.1138
SALL2	-288.186	109.673	-9.04322	3.73203e-17	1.58705e-15	28.097
LINC00461	-15.3043	3.7	-9.04025	3.80967e-17	1.61889e-15	28.0766
RP11-148L24.1	-9.56762	1.64615	-9.03323	4.00019e-17	1.69861e-15	28.0284
ADRB2	-99.5359	40.5269	-9.02753	4.16171e-17	1.76591e-15	27.9893
IGKV1-5	-10077.3	2946.2	-9.01979	4.39135e-17	1.862e-15	27.9363
CDC42SE2	-4337.31	5067.6	-9.00684	4.80432e-17	2.03563e-15	27.8476
GAPDHP74	-3.53279	0.684615	-9.00566	4.844e-17	2.05096e-15	27.8394
LINC00996	-67.7705	33.65	-9.00445	4.88469e-17	2.06669e-15	27.8312
CTSS	-13163.7	11623.3	-9.00316	4.92843e-17	2.08368e-15	27.8224
ZIK1	-76.2131	42.2269	-8.99979	5.04498e-17	2.13141e-15	27.7993
RP11-703I16.1	-77.5656	49.4577	-8.99329	5.27756e-17	2.22806e-15	27.7548
RP11-407N17.3	-15.7285	3.17692	-8.9918	5.33258e-17	2.24966e-15	27.7445
IGKV1OR1-1	-8.37398	1.70385	-8.98715	5.50699e-17	2.32156e-15	27.7128
WASL	-4635.19	4508.49	-8.97924	5.81739e-17	2.45065e-15	27.6586
ICAM3	-158.005	75.0308	-8.9762	5.94113e-17	2.50097e-15	27.6378
ANGPTL5	-13.3801	2.63077	-8.97597	5.95044e-17	2.50308e-15	27.6363
HBA2	-883.833	205.869	-8.97584	5.95576e-17	2.50352e-15	27.6354
MEF2C-AS1	-27.3268	8.79231	-8.97563	5.96442e-17	2.50427e-15	27.634
JPH2	-1549.5	364.981	-8.97559	5.96611e-17	2.50427e-15	27.6337
AC087651.1	-0.433402	0.0307692	-8.96488	6.42532e-17	2.69508e-15	27.5605
SOCS2	-630.034	457.55	-8.96214	6.54825e-17	2.74467e-15	27.5418
RP11-501J20.5	-2.94775	0.796154	-8.95937	6.67496e-17	2.79577e-15	27.5229
TCF7L1	-469.538	288.419	-8.95899	6.69265e-17	2.80117e-15	27.5202
CNTN3	-341.968	97.6385	-8.95218	7.01532e-17	2.93412e-15	27.4738
CKMT1B	-1155.97	795.546	-8.94939	7.15203e-17	2.98916e-15	27.4547
PSD	-1768.16	391.585	-8.94173	7.54075e-17	3.14937e-15	27.4024
RP11-308N19.1	-6.07787	1.54615	-8.93695	7.79382e-17	3.25274e-15	27.3699
RNU6-1065P	-5.15676	1.97308	-8.93598	7.84657e-17	3.27241e-15	27.3632
TACR2	-1791.91	313.858	-8.9327	8.02609e-17	3.34489e-15	27.3409
ERICH3	-12.3105	2.88462	-8.92501	8.46378e-17	3.52478e-15	27.2884
POU3F4	-14.6824	1.84615	-8.92482	8.47484e-17	3.52687e-15	27.2872
TDRD10	-27.3002	13.6923	-8.92325	8.56752e-17	3.56291e-15	27.2764
RP11-320N21.1	-60.7592	16.2923	-8.91716	8.93501e-17	3.71308e-15	27.235
LIFR-AS1	-18.291	6.58462	-8.91426	9.11604e-17	3.78562e-15	27.2152
TRAK2	-2473.56	2533.09	-8.91401	9.1318e-17	3.78947e-15	27.2134
NIPAL1	-1918.73	1453.72	-8.91352	9.16265e-17	3.79957e-15	27.2101
LINC01080	-9.17623	2.13846	-8.9133	9.17662e-17	3.80266e-15	27.2086
SDHA	-7981.09	7555.43	-8.91053	9.35332e-17	3.87314e-15	27.1898
MSRA	-765.176	562.162	-8.90993	9.39229e-17	3.88652e-15	27.1857
C2CD2L	-1204.39	1113.6	-8.90763	9.5422e-17	3.94576e-15	27.17
MIR4537	-5.43238	1.52692	-8.90368	9.80593e-17	4.05194e-15	27.1431
SUCLG2P2	-30.9201	22.3577	-8.90187	9.92919e-17	4.09997e-15	27.1308
NR1H4	-1302.72	124.012	-8.90053	1.00215e-16	4.13515e-15	27.1217
DES	-74008	14393.7	-8.89843	1.01677e-16	4.19254e-15	27.1074
CAMTA2	-2162.52	2004.5	-8.89696	1.02712e-16	4.2322e-15	27.0974
C18orf32	-259.344	256.615	-8.89372	1.0503e-16	4.32468e-15	27.0753
IGHV3-49	-2540.48	591.792	-8.88652	1.10371e-16	4.5414e-15	27.0264
IGKV1OR9-2	-13.625	2.58846	-8.87487	1.19591e-16	4.91729e-15	26.9472
RP11-1000B6.3	-11.8535	5.68846	-8.87156	1.2235e-16	5.0272e-15	26.9247
AC092652.1	-12.1803	2.06923	-8.86918	1.24371e-16	5.10663e-15	26.9085
ADCY2	-176.68	67.4423	-8.86884	1.24663e-16	5.11505e-15	26.9062
IGKV1OR-3	-6.74078	1.61154	-8.86678	1.26442e-16	5.18437e-15	26.8922
GLDN	-375.414	109.688	-8.86548	1.27574e-16	5.22714e-15	26.8834
GIMAP1	-292.971	160.308	-8.86528	1.27755e-16	5.23087e-15	26.882
HSPB8	-3487.14	692.015	-8.85789	1.34415e-16	5.49973e-15	26.8318
CCR2	-260.142	104.304	-8.857	1.35241e-16	5.52964e-15	26.8258
RP11-209D14.2	-2.37705	0.769231	-8.85582	1.3634e-16	5.57066e-15	26.8178
IGHV3-6	-17.54	3.72692	-8.8549	1.3721e-16	5.60231e-15	26.8115
SOCS6	-1865.73	1599.46	-8.84854	1.43343e-16	5.8486e-15	26.7684
MAGOH2P	-14.5266	6.99231	-8.84684	1.45025e-16	5.91312e-15	26.7568
KLC4	-3637.56	3098.92	-8.84657	1.45301e-16	5.92023e-15	26.755
TMIGD2	-58.4662	26.8192	-8.84476	1.47115e-16	5.98994e-15	26.7427
FBXO32	-5951.61	2413.77	-8.84083	1.51146e-16	6.14979e-15	26.716
IGHV3OR16-12	-21.5768	4.93846	-8.8382	1.53903e-16	6.25763e-15	26.6982
SPECC1	-1889.7	1381.59	-8.82788	1.65203e-16	6.71239e-15	26.6283
HIPK4	-12.4406	4.45	-8.82566	1.67745e-16	6.81093e-15	26.6132
ABHD6	-1005.27	730.969	-8.82375	1.69956e-16	6.89593e-15	26.6003
IMPA2	-3181.6	2364.75	-8.82097	1.73229e-16	7.02384e-15	26.5814
VWC2	-36.4846	10.0731	-8.80909	1.87939e-16	7.61498e-15	26.501
CCL13	-485.568	122.688	-8.80617	1.91746e-16	7.76387e-15	26.4812
TPRG1L	-4245.47	4233.98	-8.80029	1.99634e-16	8.07765e-15	26.4414
HLX-AS1	-3.0082	0.926923	-8.79388	2.08602e-16	8.43464e-15	26.398
POPDC2	-880.135	182.527	-8.79018	2.13949e-16	8.64489e-15	26.3731
SCG3	-134.41	29.6115	-8.78714	2.18449e-16	8.82061e-15	26.3525
KIAA1522	-10283.4	9330.95	-8.77954	2.30122e-16	9.28551e-15	26.3011
MYOCD	-1483.74	347.25	-8.77392	2.39154e-16	9.64329e-15	26.2632
PDK2	-1830.41	1427.23	-8.76958	2.46354e-16	9.92675e-15	26.2339
LINC00844	-1.65369	0.323077	-8.76921	2.46978e-16	9.94504e-15	26.2314
IGLV2-5	-25.5717	6.62692	-8.76676	2.51154e-16	1.01062e-14	26.2148
CALM1	-18886	20636	-8.76389	2.5613e-16	1.02994e-14	26.1955
NPR1	-501.996	213.896	-8.7592	2.64494e-16	1.06283e-14	26.1638
C14orf132	-728.244	306.196	-8.75898	2.64881e-16	1.06366e-14	26.1623
PGM5-AS1	-51.7198	6.99423	-8.75522	2.71784e-16	1.09063e-14	26.1369
RP11-350E12.4	-7.74693	2.54231	-8.74826	2.85031e-16	1.143e-14	26.09
EPM2A	-326.359	192.6	-8.74496	2.91528e-16	1.16825e-14	26.0677
RP4-798A17.5	-11.9088	4.51154	-8.74444	2.92557e-16	1.17157e-14	26.0643
RP11-100L22.1	-3.09529	0.907692	-8.74369	2.94063e-16	1.1768e-14	26.0592
SLC3A1	-2531.15	811.804	-8.74216	2.97149e-16	1.18833e-14	26.0489
MAST2	-5416.1	4618.7	-8.73957	3.02454e-16	1.20872e-14	26.0314
URAD	-849.572	267.335	-8.73562	3.10725e-16	1.24092e-14	26.0048
NPTX1	-1513.21	150.038	-8.73474	3.12614e-16	1.24761e-14	25.9988
PSEN1	-4099.65	4615.01	-8.72855	3.26108e-16	1.30058e-14	25.9571
IGHV3-36	-7.71926	1.63077	-8.72787	3.27625e-16	1.30574e-14	25.9525
LGALS3	-50609.9	37995.8	-8.72688	3.29833e-16	1.31364e-14	25.9459
METRNL	-2173.72	1829.86	-8.72627	3.31215e-16	1.31825e-14	25.9418
SIGLEC17P	-40.4805	17.0731	-8.72563	3.32675e-16	1.32315e-14	25.9374
RP11-441F2.5	-22.9201	3.86538	-8.71381	3.60616e-16	1.43331e-14	25.8579
FAM132A	-446.637	176.973	-8.71257	3.63673e-16	1.44448e-14	25.8495
ABHD11-AS1	-591.952	301.788	-8.71228	3.64375e-16	1.44628e-14	25.8476
CLCNKB	-26.5031	5.56538	-8.70809	3.74935e-16	1.48718e-14	25.8195
RP11-1263C18.1	-1.36885	0.215385	-8.70374	3.86233e-16	1.53095e-14	25.7902
ACOT11	-1685.6	1422.44	-8.69483	4.10405e-16	1.62567e-14	25.7303
TCEAL7	-145.409	66.9769	-8.68153	4.49328e-16	1.77864e-14	25.6409
BCL2L15	-3094.62	2070.5	-8.67734	4.62327e-16	1.82885e-14	25.6127
RP11-498E2.9	-8.28279	2.97692	-8.67493	4.69961e-16	1.85779e-14	25.5966
EFHC2	-85.6547	26.3038	-8.6695	4.87626e-16	1.92632e-14	25.5602
INPP5A	-1278.23	1414.49	-8.66346	5.08074e-16	2.00574e-14	25.5196
SLC27A4	-2959.76	2803.07	-8.66041	5.18742e-16	2.04647e-14	25.4991
KBTBD13	-1.60041	0.373077	-8.65938	5.22371e-16	2.0594e-14	25.4923
MEF2D	-3469.73	3110.92	-8.65867	5.24896e-16	2.06796e-14	25.4875
EFCAB1	-9.98361	4.88077	-8.65665	5.32157e-16	2.09515e-14	25.4739
C17orf59	-386.754	383.796	-8.64968	5.57969e-16	2.19529e-14	25.4272
SNAP91	-58.0666	13.5692	-8.64662	5.6968e-16	2.23986e-14	25.4067
FOXN3	-3057.38	2459.83	-8.63727	6.07055e-16	2.3852e-14	25.344
RP3-525N10.2	-9.27561	2.35769	-8.6364	6.10627e-16	2.39762e-14	25.3382
ZFR2	-6.54508	2.60769	-8.63393	6.20944e-16	2.4365e-14	25.3217
PRRG3	-53.7408	20.2538	-8.63002	6.37644e-16	2.50034e-14	25.2955
TXNIP	-34997.5	22081.9	-8.62886	6.42703e-16	2.51849e-14	25.2877
HPCA	-53.8658	33.5115	-8.62138	6.76168e-16	2.64785e-14	25.2377
GRIN2A	-55.1957	14.3885	-8.62121	6.76949e-16	2.64819e-14	25.2365
IGHV3-41	-55.9232	15.3308	-8.62116	6.77162e-16	2.64819e-14	25.2362
P2RY2	-476.608	325.285	-8.6206	6.79749e-16	2.65653e-14	25.2325
FLNB	-27791.1	22893.3	-8.61696	6.9673e-16	2.72107e-14	25.2081
AF064860.7	-14.9775	4.06923	-8.61665	6.98198e-16	2.72498e-14	25.206
RP11-7F17.3	-8.17213	3.33077	-8.61398	7.10927e-16	2.7728e-14	25.1882
CTC-428G20.1	-7.94877	5.91538	-8.61285	7.16417e-16	2.79235e-14	25.1806
KCNA5	-67.6434	22.7692	-8.60774	7.4164e-16	2.88873e-14	25.1465
LONRF2	-391.714	69.2038	-8.60646	7.48118e-16	2.91202e-14	25.1379
DPYD	-965.407	468.565	-8.60256	7.68156e-16	2.98803e-14	25.1118
SH3BGRL2	-6460.4	5956.1	-8.60108	7.75861e-16	3.01599e-14	25.102
PPP1R12B	-13030.7	4043.16	-8.59897	7.87075e-16	3.05755e-14	25.0878
GPR108	-2293.73	2713.18	-8.59793	7.92615e-16	3.07702e-14	25.0809
CCNDBP1	-1607.56	1666.56	-8.59512	8.0786e-16	3.13412e-14	25.0621
RP11-341G23.3	-16.1158	5.18846	-8.59306	8.19197e-16	3.17599e-14	25.0484
KCNMB1	-1721.62	417.135	-8.59039	8.34152e-16	3.23183e-14	25.0305
CTC-296K1.4	-30.8105	7.02308	-8.58897	8.42173e-16	3.26074e-14	25.0211
DENND1C	-1715.42	1600.08	-8.58787	8.48498e-16	3.28305e-14	25.0137
PC	-1272	899.031	-8.58723	8.52181e-16	3.29512e-14	25.0094
FOXD3-AS1	-18.4764	4.72308	-8.58712	8.52778e-16	3.29524e-14	25.0088
RP11-307B6.3	-13.1803	2.88077	-8.58555	8.61907e-16	3.32832e-14	24.9982
SLC39A5	-8030.44	4263.74	-8.5849	8.6573e-16	3.34087e-14	24.9939
LIPH	-4483.19	2954.07	-8.58371	8.72727e-16	3.36565e-14	24.9859
GRAMD4	-3581.68	3118.17	-8.58238	8.80589e-16	3.39373e-14	24.9771
TMTC1	-709.167	351.412	-8.58126	8.87309e-16	3.41687e-14	24.9696
NAT1	-820.144	490.888	-8.58118	8.87764e-16	3.41687e-14	24.9691
SVIL	-8856.15	4500.53	-8.57532	9.23654e-16	3.55266e-14	24.93
TPM1	-25588.4	16964.6	-8.57105	9.50698e-16	3.65427e-14	24.9015
IGHV1-17	-17.666	4.29615	-8.56922	9.62586e-16	3.69754e-14	24.8893
UBE2QL1	-165.565	57.5615	-8.56749	9.73875e-16	3.73844e-14	24.8778
RHAG	-6.83709	0.896154	-8.56689	9.77831e-16	3.75116e-14	24.8738
CABP2	-2.02766	0.284615	-8.5658	9.85043e-16	3.77634e-14	24.8665
GPM6B	-636.783	214.154	-8.5584	1.03557e-15	3.96744e-14	24.8172
FAM46A	-2179.4	1399.65	-8.55801	1.03835e-15	3.97547e-14	24.8146
CFP	-160.67	82.5923	-8.55749	1.04195e-15	3.98665e-14	24.8111
LYNX1	-641.929	171.762	-8.55505	1.05928e-15	4.0503e-14	24.7949
PCDH11X	-5.8668	1.11923	-8.549	1.10343e-15	4.21637e-14	24.7546
IGKV1OR2-9	-11.3186	2.31538	-8.54787	1.11194e-15	4.2461e-14	24.747
COX5A	-6616.52	6600.9	-8.54265	1.15178e-15	4.39277e-14	24.7123
FBXL22	-248.487	94.4923	-8.54264	1.15185e-15	4.39277e-14	24.7122
ANKRD35	-98.0307	46.8769	-8.53656	1.2001e-15	4.57379e-14	24.6718
POLD4	-1450.28	1262.15	-8.53627	1.20245e-15	4.57976e-14	24.6698
LILRP2	-12.2613	4.43077	-8.53185	1.23882e-15	4.71518e-14	24.6404
RP11-266I3.9	-3.54918	0.919231	-8.52485	1.29872e-15	4.93996e-14	24.5939
FER1L6	-1220.38	291.035	-8.52081	1.33459e-15	5.07308e-14	24.567
RP11-867O8.5	-13.4395	2.45	-8.51756	1.36417e-15	5.18214e-14	24.5454
C16orf62	-1813.82	1224.68	-8.50914	1.44375e-15	5.4809e-14	24.4895
DENND2A	-683.224	403.508	-8.50445	1.49002e-15	5.65289e-14	24.4584
KLF13	-6143.98	5593.73	-8.50324	1.50226e-15	5.69562e-14	24.4503
INAFM2	-477.652	298.742	-8.50044	1.53079e-15	5.80003e-14	24.4317
KIAA1045	-29.9621	8.81923	-8.4991	1.54472e-15	5.84899e-14	24.4228
RP11-2N1.2	-18.6895	2.77308	-8.49243	1.6156e-15	6.11341e-14	24.3786
ARHGAP17	-2313.52	2974.35	-8.49064	1.63519e-15	6.18355e-14	24.3667
TMC4	-6269.9	5180.88	-8.49014	1.64071e-15	6.20039e-14	24.3634
CYP1B1-AS1	-37.2121	17.7654	-8.48703	1.67539e-15	6.32737e-14	24.3427
PPP1R1A	-314.121	60.3346	-8.48488	1.69984e-15	6.41555e-14	24.3284
MARC2	-885.273	550.081	-8.48204	1.73252e-15	6.53469e-14	24.3097
LRP10	-15689.2	13784.8	-8.48023	1.75377e-15	6.61055e-14	24.2976
IGKV1-27	-1563.92	406.319	-8.47918	1.76614e-15	6.65288e-14	24.2907
MATN2	-5460.71	2218.58	-8.47703	1.7919e-15	6.74556e-14	24.2764
BDH1	-3894.42	3587.49	-8.47255	1.84666e-15	6.94721e-14	24.2467
GNAI1	-1030.51	642.342	-8.47203	1.85309e-15	6.96693e-14	24.2433
OR2W3	-31.957	9.63462	-8.4673	1.91301e-15	7.18757e-14	24.2119
APBA1	-495.923	293.908	-8.46429	1.95211e-15	7.32975e-14	24.192
FAM163A	-59.4426	21.9654	-8.46278	1.9719e-15	7.39931e-14	24.182
KCNA1	-52.6066	7.88077	-8.46215	1.98029e-15	7.42602e-14	24.1779
RP11-832A4.7	-43.3156	17.6	-8.45563	2.06892e-15	7.75341e-14	24.1347
TSC22D3	-4000.09	2427.32	-8.4503	2.14419e-15	8.03033e-14	24.0994
SLITRK3	-96.4129	19.4577	-8.44733	2.18737e-15	8.1868e-14	24.0798
RP11-115J16.2	-9.68033	1.66538	-8.44613	2.20509e-15	8.24783e-14	24.0718
PCP4L1	-160.753	31.5769	-8.44532	2.21708e-15	8.28409e-14	24.0665
NLGN4X	-212.429	72.5808	-8.44528	2.21762e-15	8.28409e-14	24.0662
SOWAHA	-1888.98	818.081	-8.43995	2.29843e-15	8.58046e-14	24.031
MT1HL1	-2.22336	0.288462	-8.43826	2.32466e-15	8.67283e-14	24.0198
TLR7	-203.53	104.558	-8.43513	2.37393e-15	8.85098e-14	23.9991
FCGRT	-15022	10622.3	-8.43451	2.3838e-15	8.88214e-14	23.995
TNS1	-20377	6231.5	-8.43254	2.41541e-15	8.99415e-14	23.982
RP11-390E23.6	-322.183	266.831	-8.42941	2.46673e-15	9.1794e-14	23.9613
CA14	-80.8545	33.2462	-8.42604	2.52292e-15	9.38255e-14	23.9391
IGKV2-26	-20.5922	4.8	-8.42285	2.57741e-15	9.57906e-14	23.918
FCRL2	-116.788	42.2115	-8.42222	2.58843e-15	9.61393e-14	23.9138
LGI4	-678.772	247.562	-8.42164	2.59842e-15	9.64486e-14	23.91
KCNC1	-15.5645	5.83077	-8.42005	2.62622e-15	9.74187e-14	23.8995
EPHA10	-1257.37	847.008	-8.41983	2.63018e-15	9.75039e-14	23.898
ZFYVE1	-740.353	775.519	-8.41907	2.64355e-15	9.79372e-14	23.893
IGKV2OR2-2	-2.80533	0.492308	-8.41607	2.69728e-15	9.98642e-14	23.8732
FRMD6-AS2	-7.73873	1.8	-8.41468	2.72237e-15	1.00729e-13	23.8641
TMEM120A	-2692.44	2027.13	-8.41327	2.74818e-15	1.0162e-13	23.8548
IGHV3-50	-9.06557	1.99231	-8.41072	2.79552e-15	1.03305e-13	23.8379
GBP3	-4367.9	2775.39	-8.41026	2.80417e-15	1.03559e-13	23.8349
ANPEP	-140740	12525.4	-8.40782	2.85034e-15	1.05198e-13	23.8188
LCN10	-14.709	3.69615	-8.40435	2.91721e-15	1.07598e-13	23.7959
OR8D1	-5.35656	0.473077	-8.40291	2.94546e-15	1.08548e-13	23.7864
IGHV1-14	-36.9416	8.26923	-8.40285	2.94669e-15	1.08548e-13	23.786
COL19A1	-29.9775	6.99231	-8.39635	3.0776e-15	1.13299e-13	23.7431
IGKV3D-11	-279.181	72.0615	-8.39491	3.1075e-15	1.14327e-13	23.7336
GPR88	-18.9539	6.15	-8.39289	3.14954e-15	1.15801e-13	23.7204
DACT3	-717.403	251.058	-8.38382	3.34644e-15	1.22963e-13	23.6606
RP11-502I4.3	-70.2664	49.3077	-8.38134	3.40238e-15	1.2494e-13	23.6442
LMO3	-1001.82	216.642	-8.38063	3.41858e-15	1.25456e-13	23.6396
ACADM	-2601.58	2005.08	-8.3765	3.51412e-15	1.28881e-13	23.6124
PRR5L	-2662.9	2268.97	-8.37412	3.57045e-15	1.30865e-13	23.5967
ATP2B2	-16.5758	5.56923	-8.37035	3.66139e-15	1.34114e-13	23.5719
CYP4F12	-2185.28	1224.13	-8.3624	3.86102e-15	1.41338e-13	23.5196
EDN2	-553.954	77.0731	-8.36089	3.90007e-15	1.42678e-13	23.5097
PALM	-888.468	374.269	-8.35999	3.92355e-15	1.43446e-13	23.5037
PGR	-223.156	68.0769	-8.35937	3.93975e-15	1.43949e-13	23.4997
SEMA3G	-900.282	348.308	-8.35817	3.97153e-15	1.45019e-13	23.4918
PDE1C	-195.528	87.9423	-8.35775	3.98262e-15	1.45333e-13	23.489
FAM63A	-1226.6	1152.32	-8.35534	4.04717e-15	1.47597e-13	23.4732
AP000439.3	-343.056	204.242	-8.35397	4.08434e-15	1.48859e-13	23.4641
IGKV2OR22-4	-81.8074	18.9769	-8.35301	4.11042e-15	1.49716e-13	23.4579
AOC3	-4806.55	1542.68	-8.3517	4.14648e-15	1.50936e-13	23.4493
NRSN1	-24.874	5.21923	-8.35099	4.16628e-15	1.51562e-13	23.4446
RP11-456K23.1	-25.7561	14.2038	-8.34975	4.20093e-15	1.52727e-13	23.4364
ELL2P1	-7.72439	3.43846	-8.34866	4.23138e-15	1.53738e-13	23.4293
CHST8	-10.6588	3.43462	-8.34599	4.30754e-15	1.56408e-13	23.4117
KCNK3	-205.223	53.2808	-8.34269	4.40306e-15	1.59777e-13	23.3901
SUN2	-5744.74	5756.78	-8.33932	4.50306e-15	1.63304e-13	23.3679
CNST	-1175.66	1254.75	-8.3371	4.57037e-15	1.65643e-13	23.3533
CTD-2256P15.5	-8.84836	3.19615	-8.33459	4.64742e-15	1.6833e-13	23.3368
RP11-490M8.1	-35.0215	27.1962	-8.33005	4.78992e-15	1.73384e-13	23.3071
SLC32A1	-5.15266	0.726923	-8.3271	4.88504e-15	1.76718e-13	23.2877
RP3-422G23.4	-16.1752	3.25769	-8.32355	5.0016e-15	1.80823e-13	23.2644
IGLV2-23	-6495.36	1867.98	-8.32106	5.08518e-15	1.83731e-13	23.2481
CASP5	-750.26	304.535	-8.32084	5.09264e-15	1.83857e-13	23.2467
TRGC2	-87.668	32.9769	-8.32077	5.09498e-15	1.83857e-13	23.2462
CTD-3157E16.2	-141.203	81.3615	-8.31819	5.18323e-15	1.86926e-13	23.2293
LDHAL6EP	-1.92828	0.315385	-8.31798	5.19057e-15	1.87075e-13	23.2279
ANKRD13A	-1854.46	2030.97	-8.31403	5.32879e-15	1.91939e-13	23.202
SLAMF7	-1613.72	699.965	-8.31128	5.42691e-15	1.95352e-13	23.184
SLC46A3	-2548.35	1516.91	-8.31054	5.45369e-15	1.96195e-13	23.1792
ZNF667-AS1	-151.069	77.4154	-8.30916	5.50399e-15	1.97883e-13	23.1701
PRKCD	-3288.47	3425.46	-8.29797	5.92908e-15	2.13035e-13	23.0968
IGHV3OR16-7	-7.51537	1.88462	-8.29394	6.08978e-15	2.18674e-13	23.0704
EPB41L4A	-278.334	136.919	-8.29129	6.19811e-15	2.22427e-13	23.053
IL5RA	-26.6342	9.94231	-8.29051	6.23017e-15	2.2344e-13	23.048
POLRMTP1	-148.966	81.3885	-8.28976	6.26147e-15	2.24425e-13	23.043
GBA3	-2549.61	196.973	-8.28966	6.26535e-15	2.24426e-13	23.0424
MAP6	-217.873	83.7846	-8.28523	6.45234e-15	2.30983e-13	23.0134
PLEKHG6	-3787.35	3144.65	-8.28478	6.47168e-15	2.31533e-13	23.0105
ABCB1	-6677.53	2599.33	-8.28407	6.50256e-15	2.32297e-13	23.0058
KANK2	-5728.34	3077.48	-8.28406	6.50261e-15	2.32297e-13	23.0058
DOLPP1	-1363.31	1268.03	-8.28401	6.50497e-15	2.32297e-13	23.0054
MYO1C	-11074	10920.4	-8.27983	6.68779e-15	2.3868e-13	22.9781
DEFB1	-471.196	157.988	-8.27846	6.74912e-15	2.40721e-13	22.9691
RP11-468E2.6	-3.90676	1.64615	-8.27555	6.88057e-15	2.4526e-13	22.9501
IKZF1	-740.456	424.423	-8.27499	6.90629e-15	2.46027e-13	22.9464
SH3BGR	-227.582	114.423	-8.27404	6.95004e-15	2.47434e-13	22.9402
DKFZp779M0652	-8.89242	2.84231	-8.27283	7.00569e-15	2.49263e-13	22.9323
RASGRP4	-105.334	58.5231	-8.27206	7.04188e-15	2.50398e-13	22.9273
GRIA3	-46.502	14.9846	-8.27179	7.05436e-15	2.50689e-13	22.9255
MYPN	-86.0533	21.4923	-8.27002	7.13784e-15	2.53502e-13	22.9139
SLC30A8	-16.2398	3.38462	-8.26906	7.18333e-15	2.54963e-13	22.9077
CAP2	-686.851	277.604	-8.26863	7.20357e-15	2.55525e-13	22.9049
IGHV5-51	-7498.48	2088.53	-8.26061	7.59693e-15	2.69315e-13	22.8525
MT1CP	-12.9365	0.984615	-8.26019	7.61827e-15	2.69908e-13	22.8497
ARHGEF26	-575.383	293.4	-8.25934	7.66144e-15	2.71272e-13	22.8442
SLC38A4	-739.943	255.592	-8.25703	7.77928e-15	2.75278e-13	22.8291
P2RY8	-196.132	103.875	-8.25566	7.85035e-15	2.77625e-13	22.8202
MT1L	-120.03	49.1692	-8.25212	8.03629e-15	2.84029e-13	22.7971
NEO1	-7713.8	6219.27	-8.24528	8.40879e-15	2.97014e-13	22.7524
RP11-781P6.1	-1.16086	0.223077	-8.24118	8.64015e-15	3.05002e-13	22.7257
IGLV10-54	-1604.56	287.119	-8.23873	8.78139e-15	3.098e-13	22.7097
IGKV1D-8	-193.139	58.2462	-8.23457	9.02629e-15	3.18248e-13	22.6826
CTC-558O2.2	-4.81557	1.98077	-8.23337	9.0986e-15	3.20604e-13	22.6747
KLK15	-124.948	52.5538	-8.2328	9.13285e-15	3.21616e-13	22.671
EIF4EBP2	-8782.82	9643.04	-8.23026	9.2876e-15	3.26869e-13	22.6545
WDR7	-707.081	658.119	-8.22779	9.44041e-15	3.32046e-13	22.6384
TPM2	-22991.8	8205.3	-8.22021	9.92573e-15	3.48906e-13	22.589
TAX1BP3	-1514.93	1518.05	-8.21941	9.97821e-15	3.5054e-13	22.5838
GPR162	-105.347	67.0731	-8.2141	1.03342e-14	3.62828e-13	22.5493
TMEM140	-846.748	737.735	-8.21047	1.05854e-14	3.71425e-13	22.5256
C20orf194	-649.625	300.977	-8.20933	1.06656e-14	3.74014e-13	22.5182
ATP2B4	-8672.55	3633.71	-8.20412	1.10386e-14	3.86862e-13	22.4843
IGHV1OR16-2	-1.51537	0.265385	-8.20372	1.10675e-14	3.87642e-13	22.4817
TRAF3IP2	-1774.74	1783.1	-8.20046	1.13082e-14	3.95833e-13	22.4605
DPEP3	-22.6762	4.71923	-8.19885	1.14294e-14	3.99838e-13	22.45
AC034236.2	-0.930328	0.126923	-8.19819	1.1479e-14	4.01331e-13	22.4458
IGHM	-38622.8	10528.7	-8.19738	1.15404e-14	4.03238e-13	22.4405
RP11-635N19.1	-25.5051	19.3769	-8.19649	1.16084e-14	4.05372e-13	22.4347
F13A1	-2569.49	789.573	-8.19432	1.17758e-14	4.10969e-13	22.4206
PLEKHB2	-6419.15	7624.81	-8.19151	1.19961e-14	4.1841e-13	22.4023
SNRK	-1293.22	1394.17	-8.19061	1.20676e-14	4.20652e-13	22.3965
APOBEC3A	-254.648	50.2731	-8.18463	1.25529e-14	4.37307e-13	22.3576
GNG13	-72.458	15.1885	-8.17858	1.30635e-14	4.54824e-13	22.3184
AGTR1	-196.724	45.8192	-8.17634	1.32585e-14	4.61339e-13	22.3038
RP11-803B1.2	-3.91598	0.95	-8.1739	1.34731e-14	4.68525e-13	22.2879
CNKSR2	-57.0061	21.3769	-8.17264	1.35858e-14	4.72162e-13	22.2797
FTH1	-26237	20920.5	-8.16961	1.38588e-14	4.81363e-13	22.2601
TRGV4	-10.1189	3.50385	-8.16588	1.42039e-14	4.93059e-13	22.2359
MYO15B	-11184.4	7821.28	-8.16438	1.43446e-14	4.97494e-13	22.2262
NIT1	-1009.56	1218.69	-8.16434	1.43488e-14	4.97494e-13	22.2259
KLHL34	-102.675	32.5808	-8.16318	1.44581e-14	5.00983e-13	22.2184
MT1P3	-10.207	1.79615	-8.1631	1.44665e-14	5.00983e-13	22.2179
IGKV1OR22-5	-29.7398	6.96538	-8.16292	1.44835e-14	5.01275e-13	22.2167
C20orf166-AS1	-112.756	23.3077	-8.16145	1.46244e-14	5.05848e-13	22.2072
AARD	-23.5707	8.94231	-8.16129	1.46392e-14	5.06062e-13	22.2062
AC092667.2	-3.39754	0.811538	-8.15893	1.48683e-14	5.13678e-13	22.1909
CLVS2	-30.5318	6.28462	-8.15489	1.52693e-14	5.2722e-13	22.1647
AC005549.2	-1.29508	0.284615	-8.15221	1.55413e-14	5.36293e-13	22.1473
C1orf21	-2971.44	2402.17	-8.14759	1.60201e-14	5.52489e-13	22.1174
IGLV4-3	-42.9016	8.23846	-8.14705	1.60769e-14	5.54123e-13	22.1139
CLMP	-1354.27	612.008	-8.14321	1.64882e-14	5.67963e-13	22.089
CLEC4M	-8.27664	1.60769	-8.14242	1.6574e-14	5.70582e-13	22.0839
CAMK4	-195.986	115.2	-8.14218	1.66006e-14	5.71161e-13	22.0823
B3GNT5	-1868.38	1719.35	-8.14049	1.67854e-14	5.77178e-13	22.0714
CPA3	-914.214	373.858	-8.13995	1.68451e-14	5.78892e-13	22.0679
LINC01352	-7.69467	3.15385	-8.13633	1.72507e-14	5.92479e-13	22.0445
SEZ6L	-58.584	15.3962	-8.13526	1.73727e-14	5.9632e-13	22.0375
SVILP1	-58.1609	27.4808	-8.13506	1.73953e-14	5.96744e-13	22.0362
NTRK3	-121.654	37.2077	-8.13444	1.74664e-14	5.98831e-13	22.0322
LINC01055	-15.5092	4.75769	-8.13422	1.74918e-14	5.99351e-13	22.0308
PLEKHA7	-1990.03	1967.68	-8.13071	1.79003e-14	6.12988e-13	22.008
FBXW5	-5293.9	5813.94	-8.12912	1.80878e-14	6.19045e-13	21.9978
NUGGC	-144.546	47.4115	-8.12624	1.8433e-14	6.30489e-13	21.9792
DCAF12L1	-2.3166	0.388462	-8.12486	1.86009e-14	6.35861e-13	21.9702
IGLV5-48	-27.415	6.58462	-8.12329	1.87939e-14	6.42084e-13	21.9601
VAPA	-4705.12	5076.17	-8.11955	1.92611e-14	6.57658e-13	21.9359
POU3F3	-28.7613	7.69615	-8.11488	1.98606e-14	6.77626e-13	21.9057
RP11-554A11.4	-90.0963	27.0731	-8.11481	1.98691e-14	6.77626e-13	21.9053
MOB3A	-1580.88	1693.84	-8.11446	1.99155e-14	6.78814e-13	21.903
MAGI3	-1454.91	1325.31	-8.11414	1.99564e-14	6.79811e-13	21.9009
RND2	-76.2766	29.7923	-8.11131	2.03305e-14	6.92148e-13	21.8827
GSTM2	-331.141	198.362	-8.11026	2.04718e-14	6.96554e-13	21.8758
LINC01158	-3.27869	0.673077	-8.10992	2.05166e-14	6.97672e-13	21.8737
RGS2	-2397.33	1050.07	-8.10832	2.07341e-14	7.04657e-13	21.8633
HMGCL	-2284.8	2294.18	-8.10533	2.11436e-14	7.18156e-13	21.844
XCL2	-19.8279	9.14231	-8.10148	2.16851e-14	7.3612e-13	21.8191
CKB	-60453.2	23993	-8.09788	2.2202e-14	7.53231e-13	21.7959
LINC00595	-26.1793	3.86923	-8.09248	2.30014e-14	7.79899e-13	21.7611
KLF3	-5427.15	6322.71	-8.09102	2.32223e-14	7.8693e-13	21.7517
PIGS	-2771.57	2998.05	-8.08994	2.33874e-14	7.92066e-13	21.7447
FLJ31104	-12.8145	7.66154	-8.08459	2.42212e-14	8.19827e-13	21.7102
AC090587.4	-6.77561	4.20385	-8.08358	2.43816e-14	8.24779e-13	21.7037
CD160	-82.4242	28.7731	-8.08217	2.46085e-14	8.31974e-13	21.6945
LINC00163	-4.27766	1.17308	-8.08188	2.46557e-14	8.33086e-13	21.6927
BTLA	-59.3412	30.8731	-8.08169	2.46862e-14	8.33635e-13	21.6914
C1orf137	-0.955943	0.165385	-8.07932	2.50711e-14	8.46144e-13	21.6762
OLFM1	-516.899	224.973	-8.07695	2.54635e-14	8.58891e-13	21.6609
SLC8A2	-202.448	53.0731	-8.07616	2.55955e-14	8.62843e-13	21.6558
RP11-64B16.2	-43.6977	16.3038	-8.07266	2.61879e-14	8.82303e-13	21.6333
NXPE1	-2773.51	1020.92	-8.07199	2.63029e-14	8.85667e-13	21.629
ADAM33	-482.676	178.777	-8.0716	2.63711e-14	8.86952e-13	21.6264
RP11-120E11.2	-14.3709	11.3885	-8.0716	2.63714e-14	8.86952e-13	21.6264
PDE4D	-1318.61	860.288	-8.06788	2.70205e-14	9.08258e-13	21.6025
FOXF1	-1508.76	812.835	-8.06266	2.79585e-14	9.39248e-13	21.5689
MEP1AP4	-28.5932	10.1038	-8.05723	2.89687e-14	9.72626e-13	21.5339
LRRC31	-1085.09	654.877	-8.05398	2.95907e-14	9.92938e-13	21.513
ZNF821	-109.901	117.05	-8.05362	2.96592e-14	9.94665e-13	21.5107
AP001171.1	-1.26742	0.123077	-8.05297	2.97853e-14	9.9832e-13	21.5065
GAS7	-1735.66	981.208	-8.04749	3.08721e-14	1.03415e-12	21.4712
MSRB3	-3044.4	1161.26	-8.04046	3.23221e-14	1.0821e-12	21.426
TSPAN3	-18008.1	17265	-8.03899	3.2632e-14	1.09185e-12	21.4166
MEF2C	-988.144	629.227	-8.03742	3.29693e-14	1.10251e-12	21.4065
CLIP3	-1212.37	553.985	-8.03568	3.33444e-14	1.11441e-12	21.3954
BMF	-1317.93	883.362	-8.03277	3.39834e-14	1.13512e-12	21.3767
RP11-126O1.6	-3.45902	1.00385	-8.03125	3.43227e-14	1.1458e-12	21.3669
RP11-489D6.2	-3.69262	0.534615	-8.03054	3.44822e-14	1.15046e-12	21.3623
HTR3A	-49.2643	16.1423	-8.029	3.48315e-14	1.16145e-12	21.3524
TBC1D9	-1050.54	745.3	-8.0278	3.51036e-14	1.16986e-12	21.3447
CRY2	-1225.32	1305.77	-8.02331	3.61471e-14	1.20395e-12	21.3159
MISP	-24461.8	19350	-8.01934	3.70939e-14	1.23478e-12	21.2904
IGHV3-20	-244.147	59.3154	-8.01085	3.92038e-14	1.30427e-12	21.2359
RP11-389G6.3	-22.8852	2.77308	-8.00963	3.95168e-14	1.31368e-12	21.2281
GIMAP8	-526.252	329.758	-8.00957	3.95317e-14	1.31368e-12	21.2277
CXCR5	-22.333	6.60385	-8.0076	4.00426e-14	1.32982e-12	21.2151
PPP1R3C	-406.526	132.554	-8.00752	4.00629e-14	1.32982e-12	21.2146
CCR12P	-1.59221	0.380769	-8.00699	4.02011e-14	1.33365e-12	21.2112
PARK2	-146.943	96.35	-8.00221	4.14735e-14	1.37508e-12	21.1805
ATP1B3	-8295.87	8666.52	-7.99996	4.20851e-14	1.39457e-12	21.1661
IGHV3OR16-10	-28.7459	6.52308	-7.99367	4.38437e-14	1.45201e-12	21.1258
IGKV1-35	-2.22541	0.411538	-7.99201	4.43177e-14	1.46688e-12	21.1152
BTG1	-4820.91	5068.07	-7.9835	4.68412e-14	1.54953e-12	21.0607
IL2	-3.82377	1.16154	-7.9833	4.69024e-14	1.55067e-12	21.0594
SH3BP1	-2683.9	2349.38	-7.97814	4.84992e-14	1.60256e-12	21.0265
CDK20	-327.033	287.092	-7.97739	4.8739e-14	1.60957e-12	21.0216
DSEL	-144.92	76.6231	-7.97503	4.94919e-14	1.63351e-12	21.0065
ACSM5	-38.3268	13.4692	-7.97214	5.04284e-14	1.66348e-12	20.988
KRT8P24	-47.1711	16.4192	-7.97198	5.04816e-14	1.6643e-12	20.987
OR2L13	-2.39754	0.5	-7.97189	5.05103e-14	1.6643e-12	20.9864
AUH	-637.828	764.923	-7.96876	5.15482e-14	1.69754e-12	20.9664
RP11-963H4.6	-1.96209	0.346154	-7.96827	5.17116e-14	1.70196e-12	20.9633
ADD1	-6605.74	8670.33	-7.96683	5.21966e-14	1.71696e-12	20.9541
TNIP1	-6765.59	8339.32	-7.96634	5.23631e-14	1.72147e-12	20.951
AKR1B10P1	-36.835	6.61923	-7.96479	5.2895e-14	1.73797e-12	20.941
RYR3	-175.66	74.9	-7.9581	5.52413e-14	1.81372e-12	20.8983
TCEAL2	-210.672	41.7923	-7.95804	5.52625e-14	1.81372e-12	20.8979
SLIT3	-2652.03	923.542	-7.95778	5.53549e-14	1.81573e-12	20.8963
RP11-875O11.1	-24.8258	16.0769	-7.95737	5.55036e-14	1.81959e-12	20.8936
PDLIM1	-10583.9	11674.4	-7.95499	5.63657e-14	1.84681e-12	20.8785
RGP1	-2272.42	2410.86	-7.95105	5.78261e-14	1.8936e-12	20.8533
AC053503.12	-61.4652	12.6923	-7.94958	5.83781e-14	1.91061e-12	20.8439
AMHR2	-5.03074	1.90385	-7.93571	6.38685e-14	2.08913e-12	20.7554
CYP4B1	-103.482	23.5115	-7.93283	6.5075e-14	2.1274e-12	20.737
MZB1	-1908.9	697.258	-7.93262	6.51598e-14	2.12848e-12	20.7357
RP11-325F22.2	-53.5994	17.2615	-7.93257	6.51811e-14	2.12848e-12	20.7354
INPP5K	-1125.48	1311.03	-7.92822	6.70453e-14	2.18814e-12	20.7077
PDCD6IP	-7691.6	9571.17	-7.92736	6.74183e-14	2.19795e-12	20.7022
CASQ1	-38.3299	11.9038	-7.92735	6.74214e-14	2.19795e-12	20.7021
HEATR5A	-1081.11	1137.92	-7.92506	6.84286e-14	2.22954e-12	20.6875
SIPA1L3	-4075.08	4203.7	-7.92281	6.94359e-14	2.2611e-12	20.6732
CTC-296K1.3	-38.3975	9.71538	-7.92125	7.01365e-14	2.28264e-12	20.6633
CPAMD8	-108.71	69.2923	-7.92026	7.05898e-14	2.29612e-12	20.6569
LMBRD1	-2124.51	2486.36	-7.91788	7.16835e-14	2.33039e-12	20.6418
TRIM3	-727.962	726.023	-7.91665	7.22561e-14	2.3477e-12	20.634
IGLV3-10	-2296.56	574.204	-7.9154	7.28446e-14	2.3655e-12	20.626
SDHD	-3464.21	3912.29	-7.91172	7.45966e-14	2.42105e-12	20.6026
MUL1	-1262.39	1560.48	-7.91122	7.48395e-14	2.42759e-12	20.5994
GZMM	-104.246	43.1692	-7.90553	7.76459e-14	2.51722e-12	20.5632
MIEF2	-402.133	478.738	-7.90266	7.90994e-14	2.56292e-12	20.5449
CDHR2	-14683.6	2875.17	-7.90031	8.03084e-14	2.60065e-12	20.53
SLC13A2	-2114.48	514.7	-7.89407	8.36099e-14	2.70606e-12	20.4903
CELF4	-39.3811	11.7923	-7.8938	8.37599e-14	2.70941e-12	20.4886
TRGV2	-6.94262	2.48462	-7.89231	8.45653e-14	2.73395e-12	20.4791
SERINC1	-5505.38	6606.97	-7.88856	8.66375e-14	2.79939e-12	20.4553
EDNRB	-769.137	487.069	-7.88803	8.69384e-14	2.80756e-12	20.4519
ZADH2	-1701.99	1871	-7.88729	8.73536e-14	2.81941e-12	20.4472
U91328.19	-148.865	124.296	-7.88444	8.89768e-14	2.87021e-12	20.4291
RP11-848P1.9	-70.3412	54.05	-7.88129	9.08006e-14	2.92743e-12	20.4091
AKR7A3	-1863.69	1221.75	-7.87949	9.18647e-14	2.9601e-12	20.3976
SLC31A2	-78.2623	53.3038	-7.87879	9.22764e-14	2.97173e-12	20.3932
MGAT4C	-31.6711	6.21538	-7.87468	9.47581e-14	3.04997e-12	20.3671
SIPA1L2	-2629.98	1922.36	-7.87369	9.53651e-14	3.06781e-12	20.3608
RP11-774O3.3	-116.524	72.0846	-7.87342	9.55275e-14	3.07135e-12	20.3592
IGKV1-39	-179.867	39.0769	-7.87111	9.69665e-14	3.1159e-12	20.3445
MMD2	-2.77357	0.584615	-7.86973	9.78302e-14	3.14192e-12	20.3357
LRRC55	-49.1557	22.1192	-7.86507	1.00813e-13	3.23593e-12	20.3062
RP11-579E24.2	-5.6332	0.588462	-7.86319	1.02042e-13	3.27357e-12	20.2942
NRARP	-2599.73	2000.57	-7.85303	1.08945e-13	3.49313e-12	20.2298
GABRG2	-30.582	5.55	-7.84967	1.11326e-13	3.56749e-12	20.2085
ARHGEF25	-907.782	370.269	-7.84794	1.12573e-13	3.60549e-12	20.1976
TP53INP1	-1325.26	1186.67	-7.84483	1.1485e-13	3.67639e-12	20.1779
CALCOCO2	-4295.57	5103.59	-7.84283	1.16336e-13	3.72193e-12	20.1652
ECI2	-2182.21	1370.58	-7.84115	1.17596e-13	3.76017e-12	20.1546
ZMIZ1	-4628.36	4949.71	-7.83652	1.21153e-13	3.8718e-12	20.1253
IGHV1OR15-1	-6.875	1.17308	-7.83333	1.2366e-13	3.94974e-12	20.1051
IGKV2D-24	-74.9846	19.6923	-7.83153	1.25099e-13	3.99354e-12	20.0937
ZNF582-AS1	-27.0082	16.1538	-7.83015	1.26215e-13	4.02696e-12	20.085
NEFL	-254.623	48.7962	-7.82692	1.28863e-13	4.10918e-12	20.0646
DSCR3	-1944.45	2433.02	-7.82335	1.31854e-13	4.20227e-12	20.042
TNK1	-802.577	851.5	-7.82032	1.34448e-13	4.2826e-12	20.0228
HBM	-1.59119	0.319231	-7.81919	1.35427e-13	4.31144e-12	20.0157
WNT2B	-496.669	320.708	-7.816	1.3823e-13	4.39827e-12	19.9955
FABP2	-4093.87	569.75	-7.80748	1.46e-13	4.64298e-12	19.9417
MFSD11	-822.171	1007.86	-7.80455	1.4877e-13	4.7285e-12	19.9232
MMP25	-228.028	135.192	-7.80225	1.50984e-13	4.79625e-12	19.9087
PER3	-803.13	489.981	-7.79965	1.53517e-13	4.87407e-12	19.8923
GIPC1	-7570.31	8465.62	-7.79911	1.54048e-13	4.88826e-12	19.8889
RPS6KA1	-6159.2	5975.77	-7.79813	1.55019e-13	4.91642e-12	19.8827
FNIP2	-2148.73	2147.62	-7.79713	1.56016e-13	4.94535e-12	19.8764
GNAQ	-3046.89	3476.24	-7.79693	1.56216e-13	4.94899e-12	19.8752
MT2P1	-15.2275	6.33462	-7.79629	1.5686e-13	4.9667e-12	19.8711
CASZ1	-1196.7	1204.94	-7.79361	1.59577e-13	5.05e-12	19.8542
ITGA7	-1734.37	802.608	-7.79195	1.61284e-13	5.10125e-12	19.8438
RP11-731D1.4	-16.8514	9.12308	-7.78777	1.65662e-13	5.23686e-12	19.8174
SHROOM3	-6842.33	6438.99	-7.78742	1.66042e-13	5.24605e-12	19.8152
GAREM	-845.144	752.177	-7.78367	1.70073e-13	5.36949e-12	19.7916
NLRP7	-24.917	9.05385	-7.78362	1.70133e-13	5.36949e-12	19.7912
BCL10	-2004.11	1950.65	-7.78107	1.72928e-13	5.45476e-12	19.7752
CAMK2D	-2570.22	2719.39	-7.777	1.77495e-13	5.5958e-12	19.7495
CDH23	-155.357	87.7038	-7.77371	1.8127e-13	5.71173e-12	19.7288
TMEM130	-118.225	41.05	-7.77041	1.85144e-13	5.83064e-12	19.708
RP11-251M1.1	-6.8002	3.68077	-7.76809	1.87906e-13	5.91442e-12	19.6935
SLC22A4	-524.661	163.438	-7.76765	1.88445e-13	5.9282e-12	19.6906
MAS1LP1	-1.47029	0.307692	-7.76504	1.91618e-13	6.02476e-12	19.6742
LHFPL2	-2011.97	2162.28	-7.75869	1.99558e-13	6.27104e-12	19.6343
NIM1K	-18.4559	12.9923	-7.7582	2.0018e-13	6.28721e-12	19.6312
IGHVII-51-2	-2.05123	0.45	-7.75575	2.03337e-13	6.38293e-12	19.6158
ARMCX1	-396.121	216.381	-7.75504	2.04261e-13	6.40848e-12	19.6113
RP11-527L4.2	-1.73053	0.438462	-7.75419	2.05374e-13	6.43995e-12	19.606
IGHVIII-67-2	-4.72541	1.06538	-7.75327	2.06584e-13	6.4744e-12	19.6002
C8orf88	-92.1066	27.3115	-7.75317	2.06723e-13	6.47527e-12	19.5996
NCF1C	-112.062	53.6462	-7.75183	2.08501e-13	6.52749e-12	19.5911
FAXDC2	-1346.53	759.642	-7.7408	2.23712e-13	6.99992e-12	19.5219
MAPK6	-2513.46	2640.02	-7.73712	2.29028e-13	7.16244e-12	19.4988
SYNGR1	-434.787	161.719	-7.73644	2.30035e-13	7.19008e-12	19.4944
PRR33	-35.4723	18.5231	-7.73516	2.31919e-13	7.24508e-12	19.4864
CTD-2308L22.1	-14.6465	6.44231	-7.73486	2.32355e-13	7.25482e-12	19.4846
ZDHHC22	-18.917	3.18462	-7.73009	2.39545e-13	7.47531e-12	19.4546
PPP1R36	-272.098	180.146	-7.72882	2.41494e-13	7.53212e-12	19.4466
FGF14-AS2	-35.8576	15.1615	-7.72726	2.43899e-13	7.60305e-12	19.4369
DLG1-AS1	-15.8432	8.81923	-7.72229	2.51754e-13	7.84372e-12	19.4057
GSTM4	-1908.21	1478.09	-7.72131	2.53329e-13	7.8886e-12	19.3996
SLC17A8	-196.408	14.8038	-7.72117	2.5356e-13	7.89158e-12	19.3987
IGKV2-29	-291.489	57.0115	-7.7176	2.59402e-13	8.0691e-12	19.3763
RP11-514D23.2	-6.71414	3.01154	-7.71412	2.65207e-13	8.24527e-12	19.3545
P2RY10	-99.4037	53.5885	-7.71355	2.66175e-13	8.27096e-12	19.3509
MPI	-1776.26	1599.37	-7.71189	2.69005e-13	8.35447e-12	19.3405
SSPN	-890.277	540.885	-7.70816	2.75476e-13	8.55088e-12	19.3171
CTD-2270F17.1	-4.31865	1.13462	-7.7054	2.80356e-13	8.69773e-12	19.2998
IGKV1-37	-4.01537	0.919231	-7.70511	2.80879e-13	8.70932e-12	19.298
UGT1A1	-310.581	43.4692	-7.70188	2.86707e-13	8.88533e-12	19.2778
IGKV1-8	-409.323	110.804	-7.6943	3.00886e-13	9.31981e-12	19.2303
IGLC6	-47.6844	15.75	-7.69193	3.05453e-13	9.45623e-12	19.2155
TMEM246	-1732.57	1435.93	-7.69126	3.06755e-13	9.49153e-12	19.2113
CMAHP	-426.741	245.708	-7.69077	3.07711e-13	9.51607e-12	19.2083
FAM102A	-5119.12	5091.27	-7.68796	3.13253e-13	9.68233e-12	19.1907
LINC00936	-47.8002	42.2038	-7.6834	3.22475e-13	9.96208e-12	19.1622
RP11-420K14.2	-3.09734	0.780769	-7.68164	3.26103e-13	1.00688e-11	19.1512
RP11-290F5.1	-125.886	61.4231	-7.67524	3.39622e-13	1.04807e-11	19.1112
PPP2CB	-2995.59	3426.5	-7.67505	3.40038e-13	1.0488e-11	19.11
RIPK3	-889.649	939.412	-7.67389	3.42549e-13	1.05599e-11	19.1028
SH2D1B	-36.5092	17.05	-7.67374	3.42874e-13	1.05643e-11	19.1019
PPP2R2B	-93.4723	41.5923	-7.66941	3.52451e-13	1.08537e-11	19.0748
TMEM9B	-2567.9	2890.75	-7.6646	3.63365e-13	1.11787e-11	19.0448
FLNA	-106504	42543.1	-7.66459	3.6339e-13	1.11787e-11	19.0447
GHITM	-9820.17	12392.3	-7.664	3.6475e-13	1.12147e-11	19.041
C15orf59	-90.8484	47.2423	-7.66302	3.67031e-13	1.12789e-11	19.0349
PELI2	-787.955	554.035	-7.66226	3.688e-13	1.13273e-11	19.0302
CORO2B	-206.812	70.4769	-7.65773	3.79569e-13	1.16519e-11	19.0019
RP11-448G15.1	-10.25	3.88077	-7.65615	3.83393e-13	1.17631e-11	18.992
PCDH1	-5284.23	5738.89	-7.65576	3.84338e-13	1.17859e-11	18.9896
HTR3B	-2.52152	0.446154	-7.65429	3.87925e-13	1.18896e-11	18.9805
IGKV1OR2-3	-27.625	5.95	-7.65347	3.89965e-13	1.19459e-11	18.9753
SPEG	-1524.59	431.542	-7.6531	3.90867e-13	1.19673e-11	18.973
RIPK1	-1475.22	1996.56	-7.65045	3.97496e-13	1.21638e-11	18.9565
TPSB2	-866.683	348.338	-7.65033	3.97803e-13	1.21669e-11	18.9557
HERC3	-1086.09	1217.12	-7.6486	4.02188e-13	1.22945e-11	18.9449
LOXL4	-179.954	96.8077	-7.63947	4.26138e-13	1.30198e-11	18.8881
NBEA	-497.634	175.177	-7.63699	4.32871e-13	1.32187e-11	18.8726
CLECL1	-26.0953	13.3231	-7.6369	4.33117e-13	1.32192e-11	18.8721
NCOA1	-1678.61	2086.94	-7.63611	4.35296e-13	1.32788e-11	18.8672
LEAP2	-194.806	83.3692	-7.63524	4.37716e-13	1.33456e-11	18.8617
LINC01497	-3.58914	0.319231	-7.63457	4.39565e-13	1.3395e-11	18.8576
DSCAML1	-107.161	32.2462	-7.63304	4.43848e-13	1.35185e-11	18.848
AP000472.2	-28.7592	5.07308	-7.63062	4.50687e-13	1.37196e-11	18.833
STK32B	-68.5758	39.7692	-7.62807	4.58039e-13	1.39362e-11	18.8171
SLC44A1	-7901.29	10019.9	-7.6277	4.59105e-13	1.39613e-11	18.8148
ADH6	-861.388	425.308	-7.62569	4.64966e-13	1.41322e-11	18.8023
ESPN	-2483.24	1559.51	-7.62145	4.77622e-13	1.45093e-11	18.7759
AP000295.10	-9.01332	5.85385	-7.61857	4.86414e-13	1.47687e-11	18.758
KIAA0408	-13.2152	2.97308	-7.61707	4.91024e-13	1.49009e-11	18.7487
KIAA1671	-4097.87	4561.18	-7.61522	4.96811e-13	1.50687e-11	18.7372
RP11-527L4.6	-1.47541	0.365385	-7.61149	5.08667e-13	1.54203e-11	18.714
AKAP6	-436.404	190.577	-7.60768	5.21055e-13	1.57877e-11	18.6903
RP13-122B23.8	-69.2592	43.0654	-7.60521	5.29243e-13	1.60275e-11	18.675
KIR2DL4	-54.7398	18.5038	-7.59652	5.59125e-13	1.69236e-11	18.621
RAB9B	-135.495	63.2808	-7.59585	5.61494e-13	1.69865e-11	18.6168
TMEM133	-221.053	224.8	-7.59548	5.62782e-13	1.70166e-11	18.6146
RP11-532F12.5	-513.571	502.346	-7.59337	5.70333e-13	1.72361e-11	18.6015
FBLN1	-10183.4	4935.96	-7.58718	5.93045e-13	1.79131e-11	18.5631
IGKC	-146228	52086.6	-7.58612	5.97048e-13	1.8021e-11	18.5565
PAFAH1B1	-3581.4	4807.81	-7.58607	5.97232e-13	1.8021e-11	18.5562
SYT9	-10.6311	2.77308	-7.58339	6.07385e-13	1.83179e-11	18.5396
UAP1	-2944.08	3504.97	-7.57826	6.27365e-13	1.89107e-11	18.5078
CCL15	-394.752	272.665	-7.57641	6.34724e-13	1.91226e-11	18.4963
BIN2	-400.882	343.35	-7.57138	6.55185e-13	1.97289e-11	18.4651
DCAF11	-3418.98	4018.42	-7.56915	6.64424e-13	1.99968e-11	18.4514
SMCHD1	-2504.46	2195.41	-7.56798	6.69343e-13	2.01344e-11	18.4441
TESPA1	-111.182	68.5346	-7.56722	6.72585e-13	2.02215e-11	18.4394
MRGPRX2	-3.92725	0.626923	-7.56475	6.83121e-13	2.05277e-11	18.4241
RP11-1069G10.1	-147.109	49.3192	-7.56465	6.83547e-13	2.053e-11	18.4235
CAT	-4566.98	4757.63	-7.56053	7.01501e-13	2.10584e-11	18.398
OLFML2A	-1437.05	830.319	-7.55978	7.04818e-13	2.11471e-11	18.3933
ARPIN	-2073.92	2222.64	-7.55813	7.12193e-13	2.13574e-11	18.3831
IDH3A	-1459.11	1548.18	-7.55376	7.32026e-13	2.19409e-11	18.3561
TUB	-217.581	101.496	-7.55342	7.33594e-13	2.19766e-11	18.354
B3GNT6	-2265.06	564.831	-7.54618	7.67789e-13	2.29892e-11	18.3092
LINC01140	-36.5072	17.9269	-7.546	7.68653e-13	2.30032e-11	18.3081
CDCA4P2	-4.10758	0.457692	-7.54575	7.69833e-13	2.30221e-11	18.3066
TXNDC11	-2073.47	2619.88	-7.54571	7.7007e-13	2.30221e-11	18.3063
RP11-375H19.2	-10.4713	4.17308	-7.54486	7.74169e-13	2.31328e-11	18.3011
FILIP1	-507.969	179.665	-7.54458	7.75533e-13	2.31617e-11	18.2994
ZBTB16	-189.438	48.6577	-7.54262	7.85143e-13	2.34367e-11	18.2873
GRIA4	-100.286	21.0731	-7.5424	7.86248e-13	2.34577e-11	18.2859
ASB5	-127.512	19.3346	-7.53988	7.98787e-13	2.38196e-11	18.2703
CYB561D1	-763.991	738.962	-7.53464	8.25508e-13	2.46038e-11	18.238
RP4-568B10.1	-8.78791	3.06538	-7.53305	8.33792e-13	2.48381e-11	18.2282
RNF185	-1001.62	1291.2	-7.53215	8.38518e-13	2.49661e-11	18.2226
RPL38P4	-1.70697	0.523077	-7.53134	8.4284e-13	2.5082e-11	18.2176
BEX4	-802.11	419.438	-7.52893	8.5565e-13	2.54502e-11	18.2027
RP11-384P7.7	-44.2592	11.0269	-7.52519	8.75999e-13	2.60422e-11	18.1796
RP11-230B22.1	-15.3299	7.98846	-7.52371	8.84151e-13	2.62712e-11	18.1705
FLJ22763	-548.511	182.181	-7.52248	8.90992e-13	2.6461e-11	18.1629
EXOC6B	-892.589	979.277	-7.51539	9.31526e-13	2.76507e-11	18.1192
CTD-2184D3.3	-1.83094	0.219231	-7.51392	9.40171e-13	2.78932e-11	18.1101
ZNF219	-1899.67	1712.73	-7.50832	9.73783e-13	2.88757e-11	18.0756
IGLV3-9	-1163.9	252.912	-7.50709	9.81308e-13	2.90841e-11	18.068
AC114877.3	-1.15574	0.165385	-7.50566	9.90138e-13	2.93309e-11	18.0592
SLC25A4	-1423.58	1558.15	-7.50331	1.00483e-12	2.9751e-11	18.0448
NCF1B	-54.6783	29.3115	-7.50232	1.01111e-12	2.99217e-11	18.0386
KCNIP4	-263.653	94.6346	-7.50005	1.02558e-12	3.03347e-11	18.0247
PTX3	-78.6834	33.8462	-7.49875	1.03392e-12	3.05658e-11	18.0167
FAM21C	-1193.21	1398.78	-7.49534	1.05624e-12	3.12099e-11	17.9957
RGAG4	-198.879	121.235	-7.49132	1.08317e-12	3.19895e-11	17.971
LSP1	-2543.89	1615.66	-7.49023	1.09058e-12	3.2192e-11	17.9643
GHR	-500.627	191.931	-7.48717	1.11169e-12	3.27984e-11	17.9454
MS4A2	-159.599	68.2846	-7.47877	1.17167e-12	3.45506e-11	17.8938
RP11-798K3.3	-1.63934	0.461538	-7.47811	1.17651e-12	3.46758e-11	17.8898
ROGDI	-801.319	923.931	-7.47675	1.18659e-12	3.49553e-11	17.8814
LINC00087	-40.6445	26.1692	-7.47565	1.19477e-12	3.51786e-11	17.8746
IGHV1OR21-1	-36.3258	10.2846	-7.47338	1.21185e-12	3.56635e-11	17.8607
TMEM74	-16.793	6.36538	-7.47184	1.22357e-12	3.59901e-11	17.8512
RP11-6N17.3	-13.2889	10.4038	-7.47052	1.23365e-12	3.62685e-11	17.8431
RP11-249C24.12	-6.06148	1.56154	-7.46907	1.24492e-12	3.65815e-11	17.8342
KIT	-884.806	420.081	-7.46842	1.24997e-12	3.67112e-11	17.8302
TLL1	-144.035	47.4538	-7.467	1.2611e-12	3.70196e-11	17.8215
ZNF385B	-49.5143	19.1577	-7.46611	1.26813e-12	3.72071e-11	17.8161
PMP2	-54.6752	8.62692	-7.46416	1.28365e-12	3.76435e-11	17.8041
FXYD6	-1666.34	648.769	-7.46305	1.29258e-12	3.78864e-11	17.7973
BPNT1	-2046.72	2292.3	-7.46281	1.29451e-12	3.79241e-11	17.7958
HEPACAM	-9.39857	2.49231	-7.45973	1.31971e-12	3.86429e-11	17.7769
TTC28	-673.838	461.754	-7.45941	1.32233e-12	3.87001e-11	17.7749
IL17B	-13.8443	9.00769	-7.45879	1.32749e-12	3.88316e-11	17.7711
DIXDC1	-1067.78	757.8	-7.45597	1.35099e-12	3.94993e-11	17.7539
RP11-33I11.3	-2.94365	1.3	-7.45558	1.35435e-12	3.95778e-11	17.7514
CRYAB	-1571.82	619.719	-7.45511	1.3583e-12	3.96734e-11	17.7486
[truncated: 7,689 more rows]

## Sheet: non-obese
Tag	logFC	AveExpr	t	P.Value	adj.P.Val	B
VSTM2A	-304.957	29.6833	-30.0985	8.37162e-72	4.88794e-67	152.522
BMP3	-3700.47	365.789	-27.9889	3.73232e-67	1.0896e-62	142.039
SCARA5	-4681.52	532.283	-26.6624	4.07897e-64	7.93862e-60	135.172
CA1	-53406.7	4333.46	-25.9512	1.89499e-62	2.76607e-58	131.4
PKIB	-6568.61	890.256	-25.3974	3.92813e-61	4.34698e-57	128.419
ADAMDEC1	-14768.8	2068.62	-25.3741	4.46707e-61	4.34698e-57	128.292
CLDN23	-8091.55	1233.14	-25.1323	1.69975e-60	1.41776e-56	126.977
SLC4A4	-14942.1	1661.47	-24.9889	3.76703e-60	2.74932e-56	126.194
CA7	-6360	511.411	-24.8476	8.27261e-60	5.36681e-56	125.42
CLEC3B	-2220.8	292.05	-24.7987	1.08721e-59	6.34787e-56	125.151
BEST4	-5005.85	417.072	-24.7363	1.54058e-59	8.17727e-56	124.808
CTNND2	-114.071	15.7056	-24.6492	2.50733e-59	1.21996e-55	124.328
TRPM6	-6161.5	839.111	-24.6005	3.2945e-59	1.43217e-55	124.06
LINC00974	-77.5841	8.25	-24.5931	3.43405e-59	1.43217e-55	124.019
OTOP2	-5705.62	420.683	-24.4429	7.98565e-59	3.10839e-55	123.188
CHP2	-19212.9	2448.61	-23.9787	1.10302e-57	4.02513e-54	120.602
RNF152	-2185.1	438.022	-23.9251	1.49634e-57	5.13922e-54	120.301
IL6R	-3832.81	852.078	-23.8567	2.21001e-57	7.16867e-54	119.917
GFRA2	-414.646	58.8389	-23.8343	2.51074e-57	7.71552e-54	119.791
C2orf88	-5119.06	745.111	-23.377	3.4539e-56	1.00831e-52	117.208
TMEM236	-5399.59	843.306	-23.2433	7.47055e-56	2.07706e-52	116.447
CDKN2B	-7251.4	1261.31	-23.1502	1.28012e-55	3.39738e-52	115.916
PYY	-4673.16	385.883	-23.0632	2.11914e-55	5.37957e-52	115.419
GLP2R	-585.93	81.2333	-22.9123	5.0918e-55	1.23873e-51	114.554
SLC17A7	-100.744	19.3778	-22.859	6.94597e-55	1.62222e-51	114.248
PLCL2	-1594.49	374.667	-22.6873	1.89235e-54	4.24957e-51	113.259
SCN9A	-923.159	153.744	-22.3999	1.02154e-53	2.20907e-50	111.596
ENPP6	-130.33	20.5444	-22.3593	1.297e-53	2.70458e-50	111.36
DHRS7C	-26.2842	2.38333	-22.1724	3.90875e-53	7.86967e-50	110.272
HPSE2	-316.078	48.2111	-22.0336	8.89291e-53	1.73077e-49	109.46
SLC26A3	-175470	19904.7	-21.805	3.46114e-52	6.5189e-49	108.119
SCGN	-746.314	80.3556	-21.4822	2.38556e-51	4.35267e-48	106.213
LDHD	-3804.71	689.611	-21.4214	3.43634e-51	6.07993e-48	105.852
CA2	-67799.5	6878.48	-21.289	7.61775e-51	1.30817e-47	105.066
METTL7A	-10052.9	2677.34	-21.2757	8.25331e-51	1.37682e-47	104.987
LGI1	-99.8254	10.4611	-21.0409	3.40976e-50	5.53015e-47	103.585
ABCA8	-2083.64	262.233	-21.0362	3.50655e-50	5.53343e-47	103.558
GCNT2	-1241.22	180.189	-20.9824	4.85919e-50	7.46615e-47	103.235
RP11-1090M7.1	-52.901	6.68889	-20.9003	7.99637e-50	1.19714e-46	102.743
P2RX2	-47.0567	6.11111	-20.8514	1.07584e-49	1.57037e-46	102.45
EDN3	-3494.15	561.361	-20.8408	1.14746e-49	1.63407e-46	102.386
ACADS	-11329.1	2887.77	-20.7119	2.5154e-49	3.49682e-46	101.611
KLF4	-20703.9	4472.31	-20.5583	6.42498e-49	8.72407e-46	100.684
BRINP3	-785.152	79.8611	-20.2913	3.30199e-48	4.38166e-45	99.066
AC106869.2	-45.1	6.31111	-20.2395	4.54086e-48	5.89172e-45	98.7511
SLC17A4	-2381.68	404.022	-20.2331	4.72129e-48	5.99265e-45	98.7126
RP11-396O20.2	-486.467	53.6667	-20.2199	5.12141e-48	6.3622e-45	98.6321
TINCR	-412.419	58.3667	-20.1531	7.72938e-48	9.40198e-45	98.2252
CA4	-22238.5	2186.54	-20.1488	7.93628e-48	9.45665e-45	98.1991
GUCA2A	-32163.4	2976.49	-20.1446	8.14474e-48	9.51093e-45	98.1735
TMEM72	-1211.03	146.739	-20.1119	9.96632e-48	1.14099e-44	97.9739
PHLPP2	-5463.02	1319.61	-19.9822	2.22021e-47	2.49291e-44	97.182
RP11-17M24.1	-8.37402	1	-19.8605	4.71501e-47	5.19425e-44	96.4373
SLC30A10	-1132.88	100.861	-19.8361	5.48542e-47	5.93106e-44	96.2876
NR3C2	-5927.09	1381.67	-19.8107	6.42219e-47	6.81768e-44	96.1317
LINC00092	-40.9521	10.0056	-19.7335	1.03698e-46	1.08118e-43	95.6579
KHDRBS2	-49.3763	5.26667	-19.7277	1.07528e-46	1.10145e-43	95.622
TNFRSF13B	-193.197	30.2944	-19.7112	1.19127e-46	1.19922e-43	95.5207
TMCC3	-5007.77	1408.75	-19.6625	1.6129e-46	1.59614e-43	95.221
TAT	-105.041	15.6222	-19.5453	3.3463e-46	3.25634e-43	94.4992
ADHFE1	-163.605	38.6722	-19.5058	4.28158e-46	4.09817e-43	94.2554
CNNM2	-2185.55	907.761	-19.3671	1.01848e-45	9.59127e-43	93.3982
CD163L1	-2232.1	405.956	-19.2274	2.44442e-45	2.26543e-42	92.5321
CADM3	-1215.04	139.944	-19.2229	2.51344e-45	2.29301e-42	92.5046
PLCD1	-3477.43	980.644	-19.192	3.05124e-45	2.74082e-42	92.3128
SLC22A18AS	-1682.95	435.6	-19.1286	4.54367e-45	4.01957e-42	91.9188
SLC51B	-3734.15	504.539	-19.0426	7.8046e-45	6.8013e-42	91.3836
RN7SKP127	-44.2064	4.75556	-19.0262	8.65299e-45	7.42974e-42	91.2815
DNASE1L3	-1323	200.322	-18.9762	1.18541e-44	1.00308e-41	90.97
PADI2	-28256.7	4725.62	-18.9376	1.51244e-44	1.26153e-41	90.7289
AHCYL2	-23708.8	5353.79	-18.7632	4.54876e-44	3.74069e-41	89.6393
SLC25A23	-9369.87	4008.3	-18.7557	4.77049e-44	3.86853e-41	89.5922
P2RY1	-1935.96	492.861	-18.7131	6.2459e-44	4.9956e-41	89.3255
SMPDL3A	-5370.28	1239.96	-18.7035	6.63692e-44	5.23662e-41	89.2654
HPGD	-8443.36	1849.13	-18.6953	6.99223e-44	5.4434e-41	89.2138
LRRC19	-6142.41	1416.74	-18.663	8.58091e-44	6.59228e-41	89.0112
ZG16	-51646.3	5636.41	-18.5747	1.50165e-43	1.13866e-40	88.4574
ZNF575	-573.997	175.228	-18.5667	1.58022e-43	1.18287e-40	88.4069
UGP2	-15057.8	5906.81	-18.5525	1.72972e-43	1.27839e-40	88.3174
HHLA2	-10376.9	2294.54	-18.5056	2.329e-43	1.69979e-40	88.023
CDKN2B-AS1	-2364.25	231.733	-18.4778	2.77997e-43	2.00388e-40	87.8478
PKNOX2	-160.778	35.9111	-18.4471	3.37809e-43	2.40533e-40	87.6549
XXbac-B476C20.9	-358.884	97.7278	-18.3325	7.0076e-43	4.92955e-40	86.9327
WSCD1	-2497.43	471.944	-18.2878	9.31865e-43	6.47724e-40	86.6505
RP11-35P15.1	-84.8692	13.1833	-18.2755	1.00789e-42	6.92324e-40	86.5729
SLC26A2	-90849	13052.7	-18.2311	1.33861e-42	9.0881e-40	86.292
SLC22A5	-3760.77	1312.46	-18.1477	2.28021e-42	1.53028e-39	85.7647
TMIGD1	-7497.16	625.533	-18.1202	2.7185e-42	1.80369e-39	85.5906
TP53INP2	-11853.6	3013.99	-18.0087	5.54955e-42	3.64069e-39	84.8841
RERGL	-155.151	18.9778	-17.8405	1.63301e-41	1.0594e-38	83.8155
TEX11	-262.685	34.5944	-17.8054	2.04623e-41	1.29993e-38	83.5922
ADH1C	-21060.3	2681.02	-17.8053	2.04828e-41	1.29993e-38	83.5912
ENTPD5	-15531.7	4096.13	-17.7966	2.16609e-41	1.35991e-38	83.5358
RETSAT	-17816.5	6400.97	-17.7804	2.40424e-41	1.49337e-38	83.4325
AC007182.6	-226.169	25.0889	-17.714	3.68423e-41	2.26433e-38	83.0099
RP1-117B12.4	-27.6172	5.83889	-17.5833	8.5585e-41	5.20526e-38	82.1752
PDCD4	-14138.6	5493.19	-17.5766	8.93565e-41	5.37862e-38	82.1325
PLAC8	-15240.9	2594.94	-17.5627	9.77129e-41	5.8216e-38	82.044
ELANE	-30.3795	5.12222	-17.5555	1.02414e-40	6.04006e-38	81.9975
MT1M	-2901.77	313.8	-17.552	1.04701e-40	6.11318e-38	81.9756
TMEM151B	-65.807	10.5611	-17.5199	1.28867e-40	7.44967e-38	81.7699
NKX2-3	-1117.98	225.228	-17.5001	1.46433e-40	8.38212e-38	81.6434
CHGA	-14949.1	1644.04	-17.4385	2.18006e-40	1.2358e-37	81.2493
GPT	-4204.54	720.739	-17.4187	2.47834e-40	1.39138e-37	81.1223
ITM2C	-99949.5	26140.1	-17.4019	2.76229e-40	1.53602e-37	81.0148
SDCBP2	-12643.5	3288.57	-17.374	3.30963e-40	1.80769e-37	80.8358
LINC01351	-21.7425	2.82778	-17.3738	3.31277e-40	1.80769e-37	80.8349
MMP28	-2589.38	505.633	-17.371	3.37385e-40	1.82397e-37	80.8168
MAMDC2	-1339.13	164.889	-17.3302	4.39386e-40	2.35029e-37	80.5552
RP11-169K16.6	-135.866	29.6389	-17.329	4.4279e-40	2.35029e-37	80.5475
VSIG2	-8414.11	1427.96	-17.2938	5.56407e-40	2.92675e-37	80.3213
GUCA2B	-6097.21	483.217	-17.2041	9.953e-40	5.18862e-37	79.7453
CHAT	-32.0599	3.25556	-17.1634	1.29605e-39	6.69666e-37	79.4838
MALL	-2544.8	689.606	-17.1448	1.46276e-39	7.49174e-37	79.3639
CWH43	-2230.33	284.283	-17.1171	1.75054e-39	8.88773e-37	79.186
ADTRP	-6500.11	1081.19	-17.0676	2.41543e-39	1.21577e-36	78.8671
APPL2	-7851.22	3176.97	-17.0565	2.59686e-39	1.29592e-36	78.7954
FUCA1	-10176.9	4353.41	-17.0406	2.87884e-39	1.42446e-36	78.6933
DHRS11	-9537.5	2304.71	-17.0262	3.1629e-39	1.55187e-36	78.6001
TMEM100	-449.473	77.5278	-16.9921	3.94811e-39	1.92099e-36	78.3804
B3GALT1	-701.518	111.917	-16.981	4.24221e-39	2.04702e-36	78.3093
TEF	-2372.51	966.144	-16.9252	6.10416e-39	2.92134e-36	77.9488
TRANK1	-5711.55	1966.18	-16.8772	8.34249e-39	3.9601e-36	77.6393
AVPR1B	-11.5993	1.7	-16.8659	8.98551e-39	4.23094e-36	77.5658
TMEM37	-5744.91	1102.31	-16.8418	1.05125e-38	4.91036e-36	77.4103
PDE9A	-5712.55	1321.79	-16.8346	1.10188e-38	5.10597e-36	77.3637
LGALS4	-177814	60210.9	-16.8289	1.14327e-38	5.25609e-36	77.3272
PPAP2A	-3303.75	1284.78	-16.8146	1.25515e-38	5.72535e-36	77.2347
C15orf48	-24007.8	6283.62	-16.7999	1.38177e-38	6.25407e-36	77.1395
ENDOD1	-5875.49	2697.01	-16.7666	1.71704e-38	7.71174e-36	76.9243
NR5A2	-2340.93	700.833	-16.7579	1.81784e-38	8.08911e-36	76.8678
SCNN1B	-5510.01	755.7	-16.757	1.82877e-38	8.08911e-36	76.8618
UNC5C	-633.922	169.861	-16.7043	2.57978e-38	1.13252e-35	76.521
EIF4E3	-2882.85	1077.05	-16.6963	2.7182e-38	1.18439e-35	76.4692
RP11-135D11.2	-6.06218	0.683333	-16.6875	2.87894e-38	1.24513e-35	76.4123
SST	-812.976	69.7389	-16.6862	2.90331e-38	1.24644e-35	76.4039
SLAMF6P1	-73.8443	13.4889	-16.6487	3.7114e-38	1.58173e-35	76.1607
GSN	-48238.2	17081.2	-16.6381	3.97678e-38	1.68255e-35	76.0922
AL928768.3	-109.161	15.2611	-16.6167	4.576e-38	1.92215e-35	75.9532
MIER3	-4750.64	2045.31	-16.6042	4.96566e-38	2.07093e-35	75.8722
HSD11B2	-26102.4	7325.81	-16.5969	5.20706e-38	2.1562e-35	75.8252
USP2	-2260.83	282.528	-16.5475	7.1957e-38	2.9587e-35	75.5047
AGPAT9	-1809.29	453.917	-16.5219	8.51075e-38	3.47494e-35	75.3384
SLC36A1	-4316.17	1544.25	-16.4828	1.0994e-37	4.45767e-35	75.0848
FAM107A	-1234.28	221.633	-16.4682	1.21027e-37	4.87339e-35	74.9896
NEU4	-2436.36	568.133	-16.4135	1.73254e-37	6.92791e-35	74.6341
PIANP	-116.337	30.9111	-16.4124	1.74423e-37	6.92791e-35	74.6275
HSD17B2	-9275.52	1229.61	-16.3961	1.94122e-37	7.65825e-35	74.5215
NAP1L2	-203.671	35.0389	-16.3815	2.13714e-37	8.37458e-35	74.4262
GNG7	-749.11	183.839	-16.3658	2.36862e-37	9.21979e-35	74.3243
PAPSS2	-14547.7	4677.88	-16.349	2.64424e-37	1.02245e-34	74.2152
PEX26	-8784.66	3872.25	-16.3369	2.8636e-37	1.09998e-34	74.1363
FGL2	-5085.2	1248.44	-16.3307	2.98229e-37	1.13808e-34	74.096
LIFR	-1197.3	243.867	-16.3156	3.29354e-37	1.2487e-34	73.9977
ETFDH	-2655.76	1071.82	-16.3078	3.46654e-37	1.30581e-34	73.9469
LPAR1	-1390.49	463.244	-16.2882	3.94379e-37	1.47606e-34	73.8191
AMPD1	-254.736	33.2	-16.2741	4.32519e-37	1.6085e-34	73.7277
PINK1	-2393.04	1183.48	-16.2588	4.78505e-37	1.76826e-34	73.6275
DMRTA1	-129.557	20.2611	-16.2557	4.88363e-37	1.79333e-34	73.6073
MS4A12	-15038.4	1517.33	-16.251	5.03566e-37	1.83761e-34	73.577
UGT1A10	-2707.26	424.644	-16.2382	5.47911e-37	1.98701e-34	73.4933
SEMA6D	-2938.18	579.022	-16.2313	5.73064e-37	2.0654e-34	73.4489
HPGDS	-283.628	53.3944	-16.2223	6.07965e-37	2.17774e-34	73.3903
NAAA	-5623.13	1798.06	-16.1137	1.24253e-36	4.42363e-34	72.682
PRPH	-338.029	50	-16.108	1.28991e-36	4.56449e-34	72.6449
CEACAM7	-137919	17613	-16.096	1.39621e-36	4.91087e-34	72.5665
GPR15	-610.304	88.85	-16.0793	1.55909e-36	5.45093e-34	72.4571
RP11-747D18.1	-106.043	15	-16.0619	1.74781e-36	6.07435e-34	72.3439
PCK1	-18199.4	3333.49	-16.0514	1.87339e-36	6.47227e-34	72.2751
AC074363.1	-16.7738	2.82222	-16.0024	2.58742e-36	8.88655e-34	71.9552
PTPRH	-8289.15	2610.05	-15.9986	2.6531e-36	9.05886e-34	71.9303
RDH5	-390.455	119.283	-15.9146	4.61717e-36	1.56734e-33	71.3813
LYPD8	-20449.5	2669.98	-15.9111	4.72569e-36	1.59491e-33	71.3582
C4orf19	-2260.45	894.5	-15.8859	5.58201e-36	1.87309e-33	71.1932
CA12	-24266.6	6532.12	-15.8834	5.67631e-36	1.89384e-33	71.1766
PRIMA1	-1070.43	118.417	-15.8811	5.76167e-36	1.9114e-33	71.1618
AC073283.4	-222.072	67.4278	-15.8768	5.92697e-36	1.95513e-33	71.1338
PLCE1	-4331.83	1595.79	-15.8474	7.19666e-36	2.36063e-33	70.9414
GREM2	-2725.46	375.839	-15.841	7.50756e-36	2.44885e-33	70.8995
RXRG	-96.6983	13.9778	-15.819	8.68351e-36	2.81669e-33	70.7553
SLC25A34	-1063.66	127.778	-15.7851	1.08608e-35	3.50349e-33	70.5336
TMEM82	-987.381	146.083	-15.7794	1.12807e-35	3.61895e-33	70.496
GSTM5	-314.849	71.9667	-15.7735	1.17293e-35	3.7423e-33	70.4574
SPPL2A	-6307.49	3206.05	-15.7648	1.24257e-35	3.94294e-33	70.4002
GLRA4	-109.576	22.2611	-15.7354	1.50889e-35	4.76215e-33	70.2078
TSPAN1	-61696.6	16958	-15.7187	1.68478e-35	5.28867e-33	70.0985
ROPN1	-21.474	3	-15.7017	1.88565e-35	5.88757e-33	69.9869
HIGD1A	-5884.38	2903.22	-15.644	2.76275e-35	8.58024e-33	69.6083
TSPAN7	-4593.22	1149.82	-15.6165	3.31352e-35	1.02363e-32	69.4282
PHOX2B	-111.103	12.8444	-15.614	3.3703e-35	1.03569e-32	69.4113
RP11-317J10.2	-95.6647	20.2444	-15.5917	3.9072e-35	1.1944e-32	69.2648
GNA11	-17614	7260.86	-15.5678	4.57565e-35	1.39145e-32	69.1083
TTC22	-3890.44	1588.54	-15.559	4.84963e-35	1.46712e-32	69.0507
AOC1	-38104.6	11603.6	-15.5486	5.19622e-35	1.56387e-32	68.9823
MT1JP	-11.643	1.50556	-15.5214	6.22462e-35	1.86378e-32	68.8033
AC079776.2	-4.92953	0.811111	-15.4618	9.23891e-35	2.75221e-32	68.4119
CTD-2385L22.2	-170.595	19.5722	-15.4444	1.03732e-34	3.07442e-32	68.2971
SMPD1	-3940.67	1528.86	-15.4351	1.10266e-34	3.25158e-32	68.2366
LINC00682	-13.8738	1.66667	-15.4215	1.20756e-34	3.54301e-32	68.1465
RILP	-1332.17	513.578	-15.4202	1.21769e-34	3.55485e-32	68.1383
CLCA4	-48648.7	5010.43	-15.4127	1.27978e-34	3.71753e-32	68.089
TLR3	-1652.06	546.028	-15.4053	1.34379e-34	3.88416e-32	68.0406
RP11-467L13.4	-31.1681	3.54444	-15.3557	1.86856e-34	5.37437e-32	67.7138
FAM181B	-40.1511	8.13333	-15.3535	1.89539e-34	5.42481e-32	67.6997
ETHE1	-16186.6	6298.66	-15.3498	1.9425e-34	5.53252e-32	67.6754
SPIB	-3137.69	373.611	-15.3438	2.02195e-34	5.73086e-32	67.6356
TUBB4A	-192.758	26.8556	-15.3428	2.03472e-34	5.7392e-32	67.6294
PCSK2	-340.131	31.9722	-15.3223	2.33197e-34	6.546e-32	67.4943
SMIM14	-7705.77	3433.06	-15.3138	2.46754e-34	6.8934e-32	67.4383
LINC00507	-18.4348	2.58889	-15.2787	3.11641e-34	8.66467e-32	67.2069
B3GALT4	-1127.03	511.444	-15.2628	3.46205e-34	9.58005e-32	67.1026
ZNF536	-152.441	26.7222	-15.2292	4.32914e-34	1.19229e-31	66.8811
BCAS1	-9786.56	2493.41	-15.2268	4.39745e-34	1.20542e-31	66.8656
RMDN2	-703.863	292.894	-15.2191	4.62928e-34	1.26304e-31	66.8147
CITED2	-3205.95	1370.59	-15.2082	4.97911e-34	1.35217e-31	66.7424
TUBAL3	-1753.8	413.25	-15.1951	5.43222e-34	1.46838e-31	66.6561
LRRN2	-1820.17	309.822	-15.1767	6.13678e-34	1.65119e-31	66.5352
LAMA1	-741.139	173.311	-15.1483	7.41512e-34	1.98599e-31	66.3477
RP11-671J11.4	-3.96131	0.555556	-15.1368	8.00571e-34	2.13438e-31	66.2717
LILRB5	-711.07	185.9	-15.1161	9.18457e-34	2.43754e-31	66.1356
ZZEF1	-8966.33	3926.62	-15.1055	9.85554e-34	2.60378e-31	66.0657
ADCY9	-2872.25	1373.19	-15.1005	1.01873e-33	2.67932e-31	66.0329
RNU6-140P	-19.3782	3.94444	-15.0986	1.03222e-33	2.70261e-31	66.0198
PTGDR2	-439.153	93.2556	-15.0864	1.11899e-33	2.91672e-31	65.9398
STMN4	-68.7296	8.31111	-15.0754	1.20402e-33	3.1244e-31	65.8673
CBLN2	-104.571	21.2889	-15.0706	1.24371e-33	3.21313e-31	65.8351
PLAC9	-387.409	108.878	-15.0474	1.45075e-33	3.73149e-31	65.6825
CFD	-5373.01	1094.51	-15.0243	1.69231e-33	4.33371e-31	65.5298
RP11-640L9.2	-98.8098	25.7111	-14.9937	2.07432e-33	5.28878e-31	65.3281
LINC01082	-140.716	32.1389	-14.9832	2.22519e-33	5.64879e-31	65.2585
SH2D7	-303.747	39.3444	-14.9796	2.27897e-33	5.76027e-31	65.2348
SGK1	-13223.2	2605.17	-14.9705	2.42153e-33	6.09421e-31	65.1747
SGCG	-47.2386	6.25	-14.9659	2.49626e-33	6.25533e-31	65.1445
FAM47E-STBD1	-256.254	101.792	-14.958	2.63116e-33	6.5652e-31	65.0924
GPA33	-36932.8	12925	-14.9455	2.8612e-33	7.10881e-31	65.0093
LINC00675	-2740.86	1068.71	-14.9263	3.25097e-33	8.04299e-31	64.8827
GLTP	-3716.97	1997.63	-14.8561	5.18976e-33	1.27854e-30	64.4191
PRKCB	-1139.09	327.328	-14.8414	5.7248e-33	1.40443e-30	64.3218
TMEM220-AS1	-153.637	33.7667	-14.8263	6.33071e-33	1.54657e-30	64.2221
EDIL3	-3709.92	1298.94	-14.7776	8.76149e-33	2.13149e-30	63.9
IGJ	-181833	25316.7	-14.7676	9.36932e-33	2.2699e-30	63.8335
DHRS9	-7142.12	1195.85	-14.7538	1.02724e-32	2.4784e-30	63.7423
ZBTB7B	-8351.61	4346.25	-14.7509	1.04743e-32	2.51672e-30	63.723
GRAMD3	-2149.66	1109.67	-14.7335	1.17603e-32	2.81414e-30	63.6082
LINC01571	-6.10456	1.10556	-14.7246	1.24819e-32	2.96839e-30	63.5492
ABCC13	-419.807	69.6667	-14.7243	1.25066e-32	2.96839e-30	63.5472
SECTM1	-9440.42	1806.24	-14.7147	1.33323e-32	3.15156e-30	63.4839
ANK3	-3033.91	1398.36	-14.6865	1.61009e-32	3.79065e-30	63.2968
UGT1A8	-875.045	113.922	-14.6558	1.97616e-32	4.63382e-30	63.0938
CLDN8	-2687.19	270.889	-14.632	2.31629e-32	5.40966e-30	62.9363
BEST2	-1461.21	222.167	-14.6287	2.36857e-32	5.50828e-30	62.9142
P2RX1	-435.18	117.711	-14.6281	2.37739e-32	5.50828e-30	62.9105
MT1G	-15838	2376.22	-14.6188	2.53024e-32	5.83924e-30	62.8488
MUSK	-81.556	13.4111	-14.5822	3.2302e-32	7.42525e-30	62.6067
ACKR2	-203.035	52.1667	-14.5715	3.46942e-32	7.94389e-30	62.5359
AC144831.1	-132.263	38.3667	-14.5651	3.62042e-32	8.25725e-30	62.4936
UGT2B17	-27636.4	3262.46	-14.5642	3.64303e-32	8.27647e-30	62.4875
HMGCLL1	-34.2543	6.98889	-14.5203	4.88537e-32	1.10559e-29	62.1966
FEV	-137.216	16.6944	-14.5013	5.54623e-32	1.2503e-29	62.0708
PIRT	-233.755	33.5889	-14.5004	5.57914e-32	1.25288e-29	62.065
PDK4	-7237.23	1402.23	-14.4871	6.10002e-32	1.3646e-29	61.9765
HAPLN1	-605.69	146.978	-14.4811	6.35085e-32	1.41529e-29	61.9366
PHGR1	-33293.3	6736.68	-14.4794	6.42234e-32	1.42578e-29	61.9255
MOGAT2	-7528.51	1377.68	-14.4619	7.21758e-32	1.59626e-29	61.8097
KCNE2	-27.374	6.37222	-14.4457	8.04466e-32	1.77247e-29	61.7022
PTPN21	-1514.77	860.706	-14.4449	8.09051e-32	1.77587e-29	61.6966
ARHGAP20	-227.686	56.45	-14.426	9.17857e-32	2.00674e-29	61.5715
TMEFF2	-51.8135	7.00556	-14.4252	9.22876e-32	2.00674e-29	61.5661
RP11-467J12.4	-44.2658	7.23889	-14.4249	9.24542e-32	2.00674e-29	61.5643
B4GALT1-AS1	-106.533	47.1611	-14.4128	1.00275e-31	2.16842e-29	61.4838
GDPD2	-1538.08	207.161	-14.4027	1.07272e-31	2.31117e-29	61.4169
MXI1	-4042.22	2266.64	-14.4016	1.08079e-31	2.31999e-29	61.4095
GSG1L	-22.3726	3.62778	-14.386	1.19893e-31	2.56418e-29	61.3067
DSC2	-12220.8	5581.57	-14.3814	1.23642e-31	2.6347e-29	61.2762
OR2S1P	-43.2621	11.4778	-14.3481	1.54574e-31	3.28187e-29	61.0548
LPHN3	-492.811	125.089	-14.3309	1.73357e-31	3.66732e-29	60.9411
PAQR5	-3153.15	1129.89	-14.2913	2.26022e-31	4.76417e-29	60.6782
C10orf54	-5304.85	1937.12	-14.2861	2.34058e-31	4.9158e-29	60.6436
FXYD1	-112.383	23.2722	-14.2796	2.44399e-31	5.11459e-29	60.6007
ADCY5	-1585.07	338.406	-14.2782	2.46763e-31	5.14563e-29	60.5912
SCIN	-5407.56	1053.83	-14.2739	2.53974e-31	5.27714e-29	60.5626
PTGER4	-3107	1234.24	-14.2721	2.56939e-31	5.31982e-29	60.5511
RPL15P21	-16.7186	4.48889	-14.2459	3.06289e-31	6.31918e-29	60.3769
SULT1B1	-16689.3	4083.6	-14.2447	3.0868e-31	6.34609e-29	60.3692
PXMP2	-1639.64	783.622	-14.2331	3.33668e-31	6.83575e-29	60.2921
ZBTB7C	-4058.42	1033.53	-14.1946	4.31937e-31	8.81801e-29	60.0362
PHOX2A	-38.5702	5.6	-14.1812	4.72344e-31	9.60933e-29	59.9475
AFF3	-400.485	83.9778	-14.1521	5.73909e-31	1.1635e-28	59.7545
TCEAL5	-27.9346	4.54444	-14.1487	5.87049e-31	1.18602e-28	59.732
TNXB	-6658.61	951.756	-14.1479	5.90228e-31	1.18672e-28	59.7267
ENHO	-114.753	29.15	-14.1476	5.91462e-31	1.18672e-28	59.7246
MXD1	-8862.92	3450.49	-14.139	6.26807e-31	1.25334e-28	59.6671
BMP5	-478.358	119.806	-14.137	6.35195e-31	1.26577e-28	59.6539
TMEM171	-3290.19	895.667	-14.1301	6.64964e-31	1.32059e-28	59.6085
CMTM5	-49.6232	5.42222	-14.1273	6.77884e-31	1.34168e-28	59.5894
C1orf210	-2611.19	1225.63	-14.1007	8.10118e-31	1.59798e-28	59.4128
SEMA6A	-5772.29	1738.21	-14.0848	9.01168e-31	1.7716e-28	59.3072
EMILIN3	-72.6624	18.2778	-14.0642	1.03458e-30	2.02705e-28	59.1703
CLEC9A	-54.286	11.25	-14.0366	1.244e-30	2.42503e-28	58.9876
ELAVL3	-29.755	4.85556	-14.0364	1.24601e-30	2.42503e-28	58.986
TDP2	-12912.4	5105.02	-14.0261	1.33553e-30	2.59061e-28	58.9172
RP11-356O9.2	-101.235	14.4611	-14.0116	1.47152e-30	2.84439e-28	58.8211
ARL14	-2349.2	549.461	-14.0111	1.4761e-30	2.84439e-28	58.818
ACACB	-2674.73	1177.76	-14.0046	1.54182e-30	2.96126e-28	58.7748
ENAM	-59.5076	11.4056	-13.9973	1.61961e-30	3.10046e-28	58.7261
RP4-811M8.1	-51.5007	6.91111	-13.981	1.80599e-30	3.44596e-28	58.6181
PPP2R3A	-1120.52	444.717	-13.9522	2.19023e-30	4.16551e-28	58.4269
UBE2FP1	-71.9023	30.4444	-13.9475	2.26086e-30	4.28588e-28	58.3954
SCG3	-150.415	29.2944	-13.939	2.39352e-30	4.52266e-28	58.3389
SULT1A1	-4233.07	1205.34	-13.9293	2.55498e-30	4.81218e-28	58.2742
SPINK2	-89.79	13.2333	-13.905	3.0061e-30	5.64364e-28	58.113
CES3	-8572.42	2410.16	-13.9026	3.05605e-30	5.71902e-28	58.0967
BMP2	-2914.76	924.139	-13.8923	3.27285e-30	6.10517e-28	58.0287
JPH4	-76.047	20.5222	-13.8819	3.51026e-30	6.52718e-28	57.9593
CHP1	-15201.5	7591.91	-13.8741	3.69777e-30	6.85403e-28	57.9077
IGHA2	-366506	48650.7	-13.8706	3.78715e-30	6.99748e-28	57.884
ARRDC4	-3466.4	1625.11	-13.87	3.80134e-30	7.00155e-28	57.8803
HTR3E	-85.7144	11.3222	-13.8632	3.97926e-30	7.30619e-28	57.835
MAL	-260.056	37.0333	-13.8572	4.14276e-30	7.58256e-28	57.7951
SCN11A	-102.988	17.9889	-13.8545	4.21801e-30	7.69616e-28	57.7772
EPB41L3	-4642.81	1105.96	-13.8452	4.48873e-30	8.16459e-28	57.7156
PIGCP1	-138.699	75.9333	-13.8412	4.61188e-30	8.36253e-28	57.6887
SCUBE2	-1048.39	266.711	-13.8381	4.70802e-30	8.51044e-28	57.6683
RUNDC3B	-480.287	118.478	-13.8371	4.74174e-30	8.54493e-28	57.6612
CTC-428G20.6	-31.5334	14.2056	-13.831	4.93812e-30	8.87145e-28	57.621
TNFRSF17	-544.782	94.7944	-13.8186	5.36537e-30	9.60945e-28	57.5387
MIR22HG	-1542.35	592.35	-13.8166	5.43779e-30	9.70937e-28	57.5254
MT1F	-3424.97	611.928	-13.8156	5.47587e-30	9.74756e-28	57.5185
CNGB1	-45.5937	6.62222	-13.8085	5.74347e-30	1.01928e-27	57.4712
LUZP2	-145.503	35.0056	-13.7965	6.22341e-30	1.10111e-27	57.3917
FAM135B	-139.114	18.9333	-13.7863	6.66268e-30	1.17527e-27	57.3241
PDZD4	-495.503	88.2833	-13.7452	8.78239e-30	1.54451e-27	57.0502
RP11-483I13.6	-19.8591	7.34444	-13.7346	9.42651e-30	1.65281e-27	56.9801
P2RX4	-3525.82	1882.82	-13.6916	1.25814e-29	2.19938e-27	56.6939
CDC14A	-936.594	368.972	-13.6837	1.32674e-29	2.31237e-27	56.6413
ISX	-4813.25	1380.07	-13.6793	1.36619e-29	2.36733e-27	56.6122
CNNM4	-9695.09	4387.96	-13.6793	1.36639e-29	2.36733e-27	56.6121
ABHD3	-4620.79	1809.7	-13.6498	1.6652e-29	2.87651e-27	56.4161
PTN	-624.259	166.211	-13.6472	1.69476e-29	2.91894e-27	56.3986
KIAA0513	-2423.56	887.317	-13.641	1.76709e-29	3.03456e-27	56.3572
SRI	-17345	8200.18	-13.638	1.80201e-29	3.08546e-27	56.3378
LRRC3B	-11.9323	2.08333	-13.6283	1.92415e-29	3.28495e-27	56.2728
SULT1A2	-1209.71	142.656	-13.6222	2.00423e-29	3.4117e-27	56.2324
ASAP3	-1682.02	632	-13.6122	2.14333e-29	3.63787e-27	56.1658
BMX	-330.869	86.95	-13.6016	2.30079e-29	3.89381e-27	56.0956
DAO	-197.972	17.6333	-13.5993	2.33614e-29	3.9422e-27	56.0805
CASR	-27.4247	4.09444	-13.5897	2.49285e-29	4.19452e-27	56.0161
RP11-2I17.4	-23.3298	4.81667	-13.5828	2.61092e-29	4.38056e-27	55.9702
CASP7	-7584.97	3647.99	-13.563	2.98187e-29	4.98861e-27	55.8385
MT1E	-8016.29	1814.89	-13.5488	3.28027e-29	5.47215e-27	55.744
CNR1	-357.925	55.1556	-13.5461	3.33938e-29	5.55488e-27	55.7263
MT1X	-3514.05	1122.98	-13.5426	3.41866e-29	5.67061e-27	55.703
ANO5	-635.664	115.783	-13.5408	3.45952e-29	5.72212e-27	55.6913
TMEM59L	-143.374	28.2111	-13.517	4.0598e-29	6.69604e-27	55.5327
C1orf177	-43.6794	12.2444	-13.5153	4.10624e-29	6.75355e-27	55.5214
SLC22A23	-4262.8	1985.46	-13.5128	4.17551e-29	6.84818e-27	55.5048
MMRN1	-1273.74	244.25	-13.5083	4.30356e-29	7.03842e-27	55.4749
CTD-2269F5.1	-33.7107	9.87778	-13.4953	4.69692e-29	7.66031e-27	55.3882
FLJ38122	-11.4947	3.02778	-13.4903	4.85694e-29	7.89923e-27	55.355
RP4-659I19.1	-12.5573	1.81111	-13.4888	4.90711e-29	7.95865e-27	55.3448
RP13-672B3.2	-8.64579	2.05556	-13.4852	5.0272e-29	8.13084e-27	55.3208
ST6GALNAC6	-10730	2259.21	-13.4819	5.13973e-29	8.28987e-27	55.2989
RP11-202A13.1	-26.2934	3.60556	-13.4794	5.22383e-29	8.40231e-27	55.2828
MAB21L1	-52.7034	8.87222	-13.4328	7.1428e-29	1.14573e-26	54.9726
RCAN2	-1093.16	417.483	-13.4309	7.23808e-29	1.15784e-26	54.9595
SSTR2	-229.372	64.6556	-13.4242	7.56793e-29	1.20729e-26	54.9153
MYOT	-117.862	20.65	-13.4206	7.75679e-29	1.23405e-26	54.8909
CLIC5	-8259.91	3028.41	-13.418	7.89075e-29	1.25195e-26	54.8739
SQRDL	-8019.16	4058.23	-13.4074	8.47446e-29	1.34092e-26	54.8032
NTN1	-1718.67	359.767	-13.4017	8.80457e-29	1.38938e-26	54.7653
RP11-326K13.4	-43.7135	27.3667	-13.3998	8.91645e-29	1.40325e-26	54.7528
2021-03-08	-3256.35	1765.37	-13.3905	9.48924e-29	1.48938e-26	54.6911
HMP19	-281.047	37.3278	-13.3642	1.13205e-28	1.77037e-26	54.5162
PGM1	-7194.5	3391.26	-13.364	1.13402e-28	1.77037e-26	54.5144
PDE6A	-509.118	92.2667	-13.3536	1.21586e-28	1.89308e-26	54.4454
CTC-297N7.9	-56.216	9.30556	-13.3331	1.39536e-28	2.16677e-26	54.3089
RP11-805I24.3	-88.4906	21.4389	-13.3274	1.44935e-28	2.24464e-26	54.2712
RP11-77K12.7	-39.9047	8.43889	-13.3265	1.4586e-28	2.253e-26	54.2649
RP11-69G7.1	-6.29111	0.855556	-13.3025	1.71374e-28	2.64011e-26	54.1051
RP11-319C21.1	-3.64947	0.383333	-13.2961	1.78834e-28	2.74778e-26	54.0629
RP11-677M14.3	-119.612	41.4111	-13.2797	1.99672e-28	3.05991e-26	53.9537
CHAD	-391.842	83.15	-13.2765	2.03979e-28	3.11772e-26	53.9325
RNF112	-116.945	36.1167	-13.2685	2.15306e-28	3.28226e-26	53.8789
BCAR3	-1682.13	914.206	-13.2596	2.28516e-28	3.47458e-26	53.8199
ASTN1	-85.2239	12.2389	-13.2488	2.45777e-28	3.72732e-26	53.7477
CES2	-43865.2	12956.6	-13.2436	2.54472e-28	3.84919e-26	53.7133
ZER1	-4541.25	2797.96	-13.2428	2.55863e-28	3.86023e-26	53.7079
AC009133.17	-22.0507	5.31111	-13.2365	2.66773e-28	4.01446e-26	53.6665
ACOX1	-11542.7	5669.76	-13.2328	2.73502e-28	4.10513e-26	53.6418
FAM187B2P	-7.67757	2.8	-13.2325	2.74216e-28	4.10529e-26	53.6392
STOX2	-211.702	55.5111	-13.2315	2.75918e-28	4.1202e-26	53.6331
SLC2A13	-1641.23	739.15	-13.2182	3.01766e-28	4.49469e-26	53.5443
RIOK3	-7164.29	3784.75	-13.2069	3.2563e-28	4.8378e-26	53.4689
DIRAS1	-143.376	39.5944	-13.196	3.50186e-28	5.18942e-26	53.3968
BTNL3	-4307.49	977.683	-13.1925	3.5852e-28	5.29947e-26	53.3735
BAI3	-118.38	19.4	-13.135	5.27456e-28	7.77691e-26	52.9908
FAM189A2	-215.12	54.8778	-13.1181	5.90791e-28	8.68879e-26	52.8784
SPOCK3	-54.9125	7.36111	-13.0701	8.15758e-28	1.19672e-25	52.5586
AC144831.3	-55.8673	17.2444	-13.0528	9.16237e-28	1.34076e-25	52.4435
TST	-15939.7	7637.53	-13.0472	9.50971e-28	1.38811e-25	52.4066
FBLIM1	-6887.78	4606.13	-13.0455	9.61785e-28	1.39766e-25	52.3954
RP11-855A2.5	-29.0963	3.46667	-13.0454	9.62304e-28	1.39766e-25	52.3948
BMP6	-328.37	95.9611	-13.0292	1.07321e-27	1.55487e-25	52.2867
GCNT3	-17534.6	5030.25	-13.0266	1.09201e-27	1.57819e-25	52.2695
RP11-232L2.2	-5.88669	1	-13.012	1.20423e-27	1.73608e-25	52.1726
MYOC	-269.661	33.5833	-13.0079	1.23798e-27	1.77906e-25	52.1452
GGT6	-9066.28	3551.81	-13.0077	1.24014e-27	1.77906e-25	52.1434
UGDH	-8885.69	4061.67	-12.999	1.31445e-27	1.88105e-25	52.0858
MGLL	-16151.9	8237.26	-12.992	1.37774e-27	1.9668e-25	52.0392
CCDC68	-1962.92	672.772	-12.9808	1.48554e-27	2.11552e-25	51.9645
C11orf86	-1773.84	213.961	-12.9781	1.51217e-27	2.1482e-25	51.9469
TESK2	-644.294	366.161	-12.9727	1.56858e-27	2.22293e-25	51.9106
UGT2B15	-1690.81	260.378	-12.9626	1.67782e-27	2.37198e-25	51.8438
AQP8	-62966.7	5087.26	-12.9446	1.89329e-27	2.67013e-25	51.7241
MT2A	-11457.5	2992.63	-12.9298	2.09092e-27	2.94175e-25	51.6257
PRKG2	-868.102	115.594	-12.9258	2.14783e-27	3.01455e-25	51.5991
SLC51A	-3635.74	430.761	-12.918	2.26463e-27	3.17086e-25	51.5466
SMIM6	-389.051	156.817	-12.9168	2.28199e-27	3.18753e-25	51.539
B3GNT7	-17461.8	2668.29	-12.8885	2.75907e-27	3.84472e-25	51.3508
C5orf66-AS1	-35.2478	10.6056	-12.879	2.9415e-27	4.08917e-25	51.2874
FAM180B	-46.2091	5.66667	-12.8768	2.98546e-27	4.14042e-25	51.2727
CCR10	-112.64	28.0333	-12.8758	3.00578e-27	4.15873e-25	51.266
IGSF9	-2983.6	1281.19	-12.8727	3.0693e-27	4.23658e-25	51.2452
SYNPO	-8107.68	3652.72	-12.87	3.1253e-27	4.3037e-25	51.2273
CD177	-30769.1	3017.35	-12.8466	3.65564e-27	5.02216e-25	51.072
BEND4	-46.4288	10.6167	-12.8134	4.56674e-27	6.25912e-25	50.8514
GDPD3	-1701.95	538.817	-12.8127	4.58832e-27	6.27397e-25	50.8467
PBLD	-5383.09	1432.38	-12.7611	6.49047e-27	8.85418e-25	50.503
MAGEE2	-10.0263	2.00556	-12.7558	6.72252e-27	9.14936e-25	50.4682
AC004947.2	-24.4988	5.11667	-12.7551	6.75592e-27	9.17343e-25	50.4633
PLP1	-1509.51	143.433	-12.7431	7.32201e-27	9.91903e-25	50.3835
LINC00908	-12.9106	3.48333	-12.7282	8.09372e-27	1.09391e-24	50.2842
CTD-2023N9.1	-6.28604	0.783333	-12.7096	9.16793e-27	1.23623e-24	50.1607
ACVRL1	-6954.83	2925.84	-12.6953	1.00911e-26	1.35758e-24	50.0656
RP5-894D12.5	-5.77107	1.26111	-12.6849	1.08206e-26	1.45238e-24	49.9964
C1orf115	-7616.99	1861.12	-12.6845	1.08507e-26	1.45307e-24	49.9937
NEFM	-71.6126	12.4056	-12.6631	1.25224e-26	1.6731e-24	49.8517
VAT1L	-364.596	118.428	-12.6258	1.60866e-26	2.1444e-24	49.6034
CPM	-3679.09	1078.01	-12.6251	1.61597e-26	2.14924e-24	49.5989
RASD2	-1490.74	415.772	-12.6125	1.75806e-26	2.33291e-24	49.5154
ANKRD9	-4230.41	1995.12	-12.6089	1.80066e-26	2.38012e-24	49.4917
CMBL	-11048.5	4227.13	-12.6088	1.8018e-26	2.38012e-24	49.4911
PKHD1L1	-185.838	34.1222	-12.6064	1.83141e-26	2.41378e-24	49.4749
GNG2	-1223.16	476.178	-12.5935	1.99732e-26	2.62652e-24	49.389
RP11-94C24.13	-36.5454	10.5556	-12.59	2.04466e-26	2.68274e-24	49.3658
FMO5	-3253.34	1032.39	-12.5869	2.08801e-26	2.72996e-24	49.345
CNTN4	-551.637	158.05	-12.5867	2.09e-26	2.72996e-24	49.344
GPD1L	-5023.91	2948.47	-12.5783	2.21108e-26	2.88166e-24	49.2882
KIAA2022	-126.221	23.4333	-12.5663	2.39614e-26	3.11589e-24	49.2085
TCF21	-661.719	231.533	-12.5514	2.64856e-26	3.43647e-24	49.1093
ACAA2	-13205.4	6103.26	-12.5281	3.09669e-26	4.00901e-24	48.9544
MAS1L	-10.3966	1.73889	-12.5275	3.10875e-26	4.01572e-24	48.9505
CUX2	-17.9742	4.47778	-12.52	3.26939e-26	4.21391e-24	48.9006
LYVE1	-1828.78	292.533	-12.517	3.33594e-26	4.2902e-24	48.8806
PCAT18	-14.5362	2.74444	-12.5008	3.71758e-26	4.77051e-24	48.7733
SYT10	-26.4067	4.03889	-12.4916	3.95554e-26	5.06474e-24	48.7118
GCG	-2208.69	197.061	-12.4637	4.76775e-26	6.09134e-24	48.5267
MMP27	-12.7918	1.51667	-12.4576	4.96845e-26	6.3339e-24	48.4858
GFRA1	-1145.25	213.078	-12.4531	5.11832e-26	6.50575e-24	48.4564
LINC00294	-613.278	424.783	-12.4529	5.12553e-26	6.50575e-24	48.455
GLIPR2	-2209.82	997.011	-12.4476	5.31267e-26	6.72865e-24	48.4195
DNER	-152.033	27.7167	-12.4441	5.43747e-26	6.87181e-24	48.3964
CTB-118N6.2	-11.4846	2.88333	-12.4232	6.25448e-26	7.88726e-24	48.2577
MPEG1	-3742.7	1323.37	-12.4207	6.35879e-26	8.00153e-24	48.2413
RP11-296E3.2	-38.2234	13.3833	-12.4187	6.4471e-26	8.0952e-24	48.2277
ASB2	-1409.69	293.272	-12.4063	7.0051e-26	8.77697e-24	48.1454
NRG2	-58.0838	11.1111	-12.3902	7.80305e-26	9.75582e-24	48.0385
FMO4	-445.682	198.583	-12.3867	7.99065e-26	9.96901e-24	48.015
RP11-1151B14.4	-4.82082	0.988889	-12.3861	8.02033e-26	9.98471e-24	48.0113
B3GNT8	-2684.72	1220.79	-12.3783	8.45211e-26	1.04999e-23	47.9593
AC093642.1	-29.7029	5.75	-12.3764	8.55997e-26	1.06113e-23	47.9468
WDR78	-613.377	199.922	-12.3756	8.60575e-26	1.06454e-23	47.9415
CLEC10A	-684.573	169.483	-12.3661	9.17222e-26	1.13222e-23	47.8783
MOBP	-37.4196	7.74444	-12.3553	9.85787e-26	1.21429e-23	47.8069
SCN2B	-182.826	30.3778	-12.3419	1.07835e-25	1.32551e-23	47.7179
HOXD1	-133.558	29.0111	-12.3411	1.08426e-25	1.32997e-23	47.7125
AMN	-9117.7	2337.8	-12.3331	1.144e-25	1.40031e-23	47.6594
NXPE4	-8312.64	1892.41	-12.3156	1.28586e-25	1.57065e-23	47.5435
HAGLR	-2058.5	583.094	-12.3118	1.31898e-25	1.60776e-23	47.5183
SLC9A9	-448.213	161.389	-12.3074	1.35912e-25	1.65323e-23	47.4886
ABI3BP	-2470.27	498.989	-12.2943	1.48338e-25	1.80063e-23	47.4019
ADH1B	-5380.44	781.761	-12.2887	1.53957e-25	1.86495e-23	47.3651
MOCS1	-1201.98	500.372	-12.2834	1.59565e-25	1.92888e-23	47.3296
TOM1L2	-3688.58	2478.97	-12.2664	1.78766e-25	2.15653e-23	47.217
B4GALNT2	-8828.74	965.278	-12.266	1.79234e-25	2.15772e-23	47.2144
CPNE5	-949.526	309.128	-12.26	1.86639e-25	2.24224e-23	47.1743
RGS9	-170.159	53.3611	-12.2596	1.87191e-25	2.24425e-23	47.1714
SLC25A20	-1986.92	1076.58	-12.2579	1.89329e-25	2.26524e-23	47.1601
REP15	-228.386	57.4167	-12.2511	1.98089e-25	2.3652e-23	47.1153
DAAM2	-1151.91	456.978	-12.2462	2.04648e-25	2.43852e-23	47.083
NEFL	-287.237	41.7389	-12.2351	2.2048e-25	2.62183e-23	47.0092
KLB	-141.708	44.45	-12.231	2.26553e-25	2.68857e-23	46.9823
ARHGAP44	-3526.57	1174.2	-12.2265	2.33548e-25	2.76596e-23	46.9521
ATP13A4	-251.388	60.8444	-12.2247	2.36328e-25	2.79321e-23	46.9404
CD209	-1289.41	349.789	-12.2226	2.39655e-25	2.82682e-23	46.9266
SIAE	-9899.54	4764.43	-12.2181	2.47066e-25	2.90836e-23	46.8964
ACO2	-9190.24	6200.34	-12.2076	2.65128e-25	3.11469e-23	46.8265
SEMA3E	-257.664	42.0222	-12.2066	2.66871e-25	3.12887e-23	46.82
JAM2	-1074.07	310.806	-12.2019	2.75395e-25	3.22235e-23	46.7888
SLCO2A1	-4169.21	1416.75	-12.1994	2.80027e-25	3.26999e-23	46.7723
RP1-35C21.1	-63.6748	7.07778	-12.1691	3.42872e-25	3.99586e-23	46.5717
ATCAY	-74.7494	11.5722	-12.1671	3.47589e-25	4.04277e-23	46.5581
FOXF2	-1080.2	299.428	-12.1633	3.56442e-25	4.13749e-23	46.5332
SFRP1	-2423.03	376.117	-12.1604	3.63408e-25	4.20998e-23	46.514
TPH1	-420.643	72.5833	-12.1527	3.82813e-25	4.426e-23	46.4625
KIAA1211	-2305.46	754.811	-12.1499	3.90047e-25	4.50073e-23	46.4439
NWD2	-111.279	23.9889	-12.1472	3.97073e-25	4.57276e-23	46.4262
SH2D6	-194.096	41.9222	-12.1335	4.35305e-25	5.00318e-23	46.3352
PRDX6	-16244.2	9821.79	-12.1302	4.44775e-25	5.10198e-23	46.3138
CAPN5	-15111.2	8112.82	-12.1099	5.09497e-25	5.83295e-23	46.1792
PDCD4-AS1	-122.515	65.7944	-12.1079	5.16354e-25	5.89988e-23	46.166
FCGBP	-182569	36457.8	-12.093	5.70672e-25	6.50777e-23	46.0669
WI2-2373I1.2	-5.82957	0.822222	-12.0836	6.07757e-25	6.91717e-23	46.0045
HBB	-7588.87	1085.99	-12.0516	7.5252e-25	8.54813e-23	45.7928
STAB2	-156.269	48.5556	-12.0455	7.83936e-25	8.8877e-23	45.7523
SUGCT	-473.456	163.661	-12.0447	7.88097e-25	8.91756e-23	45.747
AC131263.1	-31.1796	15.0722	-12.0432	7.96054e-25	8.99017e-23	45.7371
NCR2	-9.66743	1.8	-12.0348	8.41821e-25	9.48868e-23	45.6817
VIPR1	-4669.05	1915.01	-12.029	8.7551e-25	9.8494e-23	45.6428
ATP1B2	-177.911	49.8611	-12.0253	8.97085e-25	1.00727e-22	45.6187
ATP6V1G2	-55.474	18.4556	-12.0246	9.01396e-25	1.01017e-22	45.6139
C16orf54	-298.877	105.939	-12.008	1.00747e-24	1.12688e-22	45.5037
CPT2	-2979.25	1803.38	-11.9993	1.06764e-24	1.1919e-22	45.4462
RP11-293M10.6	-84.5652	36.85	-11.9959	1.0923e-24	1.2171e-22	45.4236
CDKL1	-199.228	99.0833	-11.9927	1.11557e-24	1.24066e-22	45.4027
IGHV3OR16-13	-182.822	28.2278	-11.9887	1.14616e-24	1.27226e-22	45.3759
CORO2B	-227.358	69.6778	-11.9617	1.37244e-24	1.52054e-22	45.1974
RP11-432I5.8	-11.7287	2.27222	-11.9587	1.40022e-24	1.54839e-22	45.1775
MOB3B	-3038.57	1659.03	-11.9438	1.547e-24	1.70747e-22	45.0788
PDE2A	-829.755	216.633	-11.9414	1.57192e-24	1.73169e-22	45.0629
AC116035.1	-5.48319	1.06667	-11.9249	1.75558e-24	1.93038e-22	44.9534
DISP2	-1046.87	310.894	-11.9225	1.78333e-24	1.95527e-22	44.9379
MAOA	-21857	7420.4	-11.9224	1.78491e-24	1.95527e-22	44.937
MYOM1	-878.883	170.822	-11.9212	1.79921e-24	1.96724e-22	44.9291
GALNT12	-4169.36	2212.29	-11.9097	1.94311e-24	2.12061e-22	44.8529
RELL1	-437.63	176.361	-11.8954	2.13729e-24	2.32817e-22	44.7585
CTD-2001J20.1	-11.8466	2.31667	-11.8914	2.19497e-24	2.38655e-22	44.7321
GALR1	-31.3441	4.68889	-11.8891	2.22901e-24	2.41906e-22	44.7169
IRF4	-1137.66	295.117	-11.8871	2.25937e-24	2.44745e-22	44.7035
SLCO4C1	-344.322	45.7	-11.8849	2.29311e-24	2.4794e-22	44.6888
DHDDS	-2603.42	1875.83	-11.8766	2.42356e-24	2.61561e-22	44.634
SLC25A47P1	-11.8365	1.17222	-11.8712	2.51183e-24	2.70587e-22	44.5985
LTBP4	-13656.1	6128.31	-11.8614	2.68284e-24	2.88477e-22	44.5333
KLRB1	-379.025	122.733	-11.8489	2.91589e-24	3.1296e-22	44.4508
TARID	-41.8208	13.6611	-11.8486	2.92188e-24	3.13028e-22	44.4487
LY9	-249.282	77.1833	-11.8379	3.13662e-24	3.35418e-22	44.3785
LINC00891	-9.89959	2.2	-11.8342	3.21634e-24	3.43314e-22	44.3536
HSPA2	-3640.51	986.65	-11.8299	3.30967e-24	3.52631e-22	44.3253
IGKV2-30	-603.614	92.2111	-11.8281	3.35043e-24	3.56323e-22	44.3131
MB	-557.041	135.267	-11.8269	3.37713e-24	3.5851e-22	44.3053
SCUBE1	-547.945	169.706	-11.826	3.39795e-24	3.60065e-22	44.2992
ATP2A3	-16851.6	6071.55	-11.8118	3.73553e-24	3.9512e-22	44.2053
STYK1	-1146.44	516.589	-11.8106	3.76519e-24	3.97538e-22	44.1975
C1QTNF9	-31.9005	7.71111	-11.8038	3.93883e-24	4.1512e-22	44.1528
BTNL8	-5532.86	890.661	-11.798	4.09537e-24	4.3084e-22	44.1142
CCDC69	-5109.07	1260.84	-11.7952	4.17151e-24	4.38061e-22	44.096
STIM1	-3338.7	2685.58	-11.7899	4.32095e-24	4.52939e-22	44.0611
SLC27A6	-52.9143	9.06111	-11.7785	4.66245e-24	4.87861e-22	43.9858
C1QTNF2	-135.809	58.4611	-11.7776	4.69096e-24	4.89966e-22	43.9797
RP11-963H4.3	-38.0309	10.6389	-11.7709	4.90507e-24	5.11414e-22	43.9355
CCL23	-78.5039	18.0889	-11.7646	5.11542e-24	5.32396e-22	43.8939
CNTFR	-1276.37	158.817	-11.7524	5.55126e-24	5.76729e-22	43.8129
RP11-284N8.3	-224.93	66.1611	-11.7481	5.71179e-24	5.92352e-22	43.7847
IGKV1-12	-394.886	64.1722	-11.7313	6.38983e-24	6.61494e-22	43.6735
RP4-668J24.2	-16.3234	4.85556	-11.7299	6.44866e-24	6.66404e-22	43.6645
KCNA3	-120.935	35.2611	-11.7242	6.69749e-24	6.90895e-22	43.6269
IGLV4-3	-48.1635	8.16111	-11.7156	7.09465e-24	7.30574e-22	43.5699
CNTN2	-172.291	24.3833	-11.6635	1.0039e-23	1.03195e-21	43.226
C16orf89	-418.264	77.4056	-11.6604	1.02463e-23	1.0514e-21	43.2057
RP11-459C13.1	-12.2708	3	-11.6594	1.0318e-23	1.05691e-21	43.1988
LCN6	-22.4454	4.48333	-11.6588	1.03597e-23	1.05932e-21	43.1948
RP11-345P4.9	-285.761	170.339	-11.6573	1.04661e-23	1.06833e-21	43.1847
P2RY14	-545.333	133.283	-11.6467	1.12316e-23	1.14447e-21	43.1148
RAB27A	-2303.92	1287.78	-11.6439	1.14399e-23	1.16366e-21	43.0966
IGHV3-7	-729.691	105.778	-11.6344	1.21873e-23	1.23753e-21	43.0339
RP11-442O1.3	-11.0709	3.80556	-11.6322	1.23677e-23	1.25367e-21	43.0193
TLCD2	-1832.78	946.667	-11.6315	1.24277e-23	1.25757e-21	43.0145
CNTNAP3	-85.4473	18.8778	-11.6198	1.34282e-23	1.35645e-21	42.9378
SLC5A7	-76.5587	10.8167	-11.6188	1.35237e-23	1.36375e-21	42.9308
SLC41A2	-2068.95	1038.86	-11.6024	1.5082e-23	1.51827e-21	42.8228
CLCA1	-72111.1	12785.1	-11.5983	1.55003e-23	1.55769e-21	42.7957
PJA2	-5317.37	3668.12	-11.5771	1.78498e-23	1.79072e-21	42.6559
GNG13	-74.8719	14.2278	-11.5618	1.9765e-23	1.97945e-21	42.5549
PDLIM2	-1360.05	726.639	-11.5531	2.09378e-23	2.09331e-21	42.4978
PRKAR2B	-1014.8	341.567	-11.5396	2.29148e-23	2.28705e-21	42.4085
MPZ	-402.765	81.9389	-11.5355	2.35505e-23	2.34649e-21	42.3814
MPND	-1820.43	1312.58	-11.5182	2.64201e-23	2.62792e-21	42.2675
LGALS9C	-1254.59	242.017	-11.5162	2.67628e-23	2.65748e-21	42.2547
CBX7	-2288.68	1083.69	-11.5143	2.71144e-23	2.68782e-21	42.2418
GPER1	-435.05	142.678	-11.5092	2.80376e-23	2.77463e-21	42.2086
PRKACB	-6514.67	2681.99	-11.5055	2.87488e-23	2.8402e-21	42.1838
FHL1	-11247.9	2058.34	-11.4889	3.20936e-23	3.16529e-21	42.0748
ITGA8	-611.629	245.006	-11.4793	3.42132e-23	3.36864e-21	42.0114
RP3-407E4.3	-26.7678	3.55	-11.4719	3.59494e-23	3.53363e-21	41.9624
RP11-434H14.1	-16.9222	2.3	-11.4637	3.79581e-23	3.72481e-21	41.9085
PPAP2B	-3080.94	1759.03	-11.4519	4.10534e-23	4.02178e-21	41.8309
CIPC	-2099.29	1483.87	-11.4496	4.1695e-23	4.0778e-21	41.8155
SLC9A2	-3951.88	1277.84	-11.4468	4.24545e-23	4.14514e-21	41.7977
FNBP1	-4257.99	1916.84	-11.432	4.68614e-23	4.56777e-21	41.6998
CCNYL1	-1693.37	1195.16	-11.4242	4.93486e-23	4.80219e-21	41.6486
OTOP3	-196.803	15.8722	-11.4136	5.29626e-23	5.1453e-21	41.5786
SCN4B	-361.942	118.506	-11.4127	5.32557e-23	5.16518e-21	41.5732
ITM2A	-1050.01	357.75	-11.4054	5.59276e-23	5.41534e-21	41.5247
NEURL1B	-5500.63	3061.87	-11.3995	5.81693e-23	5.62306e-21	41.4857
COL4A6	-210.714	58.8889	-11.3987	5.84781e-23	5.64357e-21	41.4805
RP11-170L3.7	-89.6476	14.75	-11.3969	5.91812e-23	5.702e-21	41.4687
CEND1	-49.4035	15.4722	-11.3852	6.39552e-23	6.14746e-21	41.3918
CPNE8	-773.584	327.056	-11.385	6.40152e-23	6.14746e-21	41.3909
ATP2B3	-28.3639	4.3	-11.3787	6.67526e-23	6.39981e-21	41.3494
RP11-730A19.9	-18.3229	8.53889	-11.3775	6.73197e-23	6.44359e-21	41.341
SSBP2	-761.94	297.089	-11.3747	6.8581e-23	6.55358e-21	41.3227
EMP1	-15582	6448.5	-11.3582	7.65015e-23	7.29851e-21	41.2144
GRIK3	-435.992	64.65	-11.349	8.13462e-23	7.74806e-21	41.1536
MAPK4	-262.117	36.5833	-11.3447	8.36702e-23	7.95644e-21	41.1257
AC093627.8	-31.4956	6.39444	-11.3401	8.62734e-23	8.19064e-21	41.0954
NEGR1	-1304.26	287.633	-11.3372	8.79476e-23	8.33603e-21	41.0763
RP11-103J17.2	-13.2644	2.61667	-11.3358	8.87999e-23	8.40318e-21	41.0668
SUCLG2	-10178.1	6459.68	-11.3317	9.12185e-23	8.61808e-21	41.0402
PLCD3	-11747.1	5284.38	-11.3234	9.64174e-23	9.09454e-21	40.9853
CLDN7	-23396.9	15108.8	-11.2958	1.15734e-22	1.0899e-20	40.8044
STAP2	-6988.11	4592.66	-11.2947	1.16609e-22	1.09636e-20	40.797
CEACAM1	-34278.3	13562	-11.2893	1.2088e-22	1.13361e-20	40.7613
SLC9A1	-6685.56	3733.44	-11.2892	1.20958e-22	1.13361e-20	40.7607
SSTR3	-36.3883	9.31667	-11.2878	1.2209e-22	1.14239e-20	40.7515
XXbac-BPG13B8.10	-17.1548	3.16111	-11.2833	1.25765e-22	1.17488e-20	40.7221
LRRC66	-1048.64	413.861	-11.282	1.26843e-22	1.18307e-20	40.7136
DPYSL5	-42.2989	8.29444	-11.2772	1.31002e-22	1.21991e-20	40.6817
TCEAL6	-14.5375	2.12778	-11.275	1.32884e-22	1.23546e-20	40.6676
KLF9	-3294.57	1287.83	-11.2605	1.4635e-22	1.35849e-20	40.572
BAALC	-99.3303	29.7667	-11.2593	1.47508e-22	1.36707e-20	40.5642
RP11-349K16.1	-333.812	111.528	-11.2519	1.54908e-22	1.43338e-20	40.5157
FGFBP2	-59.2257	12.2056	-11.2484	1.58485e-22	1.46415e-20	40.4931
SLC8A3	-27.8844	9.28333	-11.2395	1.68194e-22	1.5514e-20	40.4342
COL6A5	-69.2248	12.0056	-11.2389	1.6882e-22	1.55472e-20	40.4305
BDKRB1	-204.376	85	-11.2377	1.70161e-22	1.56459e-20	40.4227
RP11-380P13.1	-18.7738	2.96667	-11.2313	1.77544e-22	1.62992e-20	40.3806
GAP43	-237.2	54.7	-11.228	1.81537e-22	1.66395e-20	40.3586
SLC44A4	-28640.7	14524.4	-11.221	1.90098e-22	1.7397e-20	40.313
CHMP1B	-3901.7	2907.01	-11.2194	1.92107e-22	1.75533e-20	40.3025
CTSG	-358.018	70.3	-11.2055	2.10696e-22	1.92218e-20	40.2111
CD1D	-287.308	122.75	-11.1998	2.18775e-22	1.99277e-20	40.1738
FIGF	-205.213	26.8389	-11.1985	2.20695e-22	2.00712e-20	40.1652
SLC16A12	-19.5689	5.84444	-11.1949	2.25925e-22	2.05149e-20	40.142
RBM47	-11552.2	8093.65	-11.1923	2.29862e-22	2.084e-20	40.1249
RP11-710C12.1	-18.6637	7.76111	-11.1835	2.43746e-22	2.20645e-20	40.0668
RP11-1166P10.8	-74.351	16.7111	-11.1706	2.65423e-22	2.39896e-20	39.9824
ANKRD33B	-194.961	80.8889	-11.1645	2.76476e-22	2.49499e-20	39.942
RP11-452I5.2	-307.784	101.522	-11.1638	2.77718e-22	2.50234e-20	39.9376
SPATA31C1	-3.37494	0.561111	-11.1494	3.05564e-22	2.74899e-20	39.8429
SEZ6L	-66.345	15.1389	-11.1428	3.19101e-22	2.86637e-20	39.8
ANGPTL1	-975.335	166.644	-11.1425	3.19659e-22	2.86696e-20	39.7983
C5orf30	-2075.96	1385.58	-11.1306	3.46e-22	3.09845e-20	39.7199
PTGS1	-5194.73	1066.98	-11.1226	3.6485e-22	3.26225e-20	39.6674
WI2-2373I1.1	-2.41778	0.372222	-11.1203	3.70331e-22	3.3062e-20	39.6526
ANGPTL7	-195.051	26.8056	-11.1192	3.73167e-22	3.32643e-20	39.645
NPY	-49.1773	8.06667	-11.1165	3.7984e-22	3.38075e-20	39.6275
FGFR2	-2923.98	945.656	-11.114	3.86056e-22	3.43085e-20	39.6114
NBPF1	-1224.79	739.589	-11.1125	3.90037e-22	3.46096e-20	39.6012
ABCB11	-215.2	24.1111	-11.1101	3.96275e-22	3.51097e-20	39.5855
CCL28	-4160.62	1340.02	-11.1051	4.09514e-22	3.62277e-20	39.553
CDH10	-15.4316	2.14444	-11.095	4.37743e-22	3.86438e-20	39.487
FOXD3	-50.6485	7.85556	-11.0949	4.38149e-22	3.86438e-20	39.4861
IGHV3-71	-80.5246	17.9833	-11.0927	4.44521e-22	3.91467e-20	39.4718
CTD-2588E21.1	-17.1879	6.36111	-11.0849	4.68051e-22	4.11568e-20	39.4207
PDE7B	-244.31	80.4889	-11.0837	4.71968e-22	4.14388e-20	39.4124
TMPRSS2	-18727.2	10310	-11.0637	5.38592e-22	4.72174e-20	39.2817
KAT2B	-1399.29	674.461	-11.0449	6.09866e-22	5.33857e-20	39.1586
DNAJC28	-60.6278	33.8278	-11.0431	6.17192e-22	5.39461e-20	39.1468
MPC1	-2291.94	1604.52	-11.0406	6.27409e-22	5.47572e-20	39.1306
ATP8B1	-17751.3	9301.35	-11.0338	6.56097e-22	5.71754e-20	39.0863
B3GALT5	-9952.59	2033.29	-11.0304	6.71261e-22	5.83766e-20	39.0637
CDH19	-338.726	48.5833	-11.0302	6.7188e-22	5.83766e-20	39.0627
RP11-671J11.7	-4.48042	1.22778	-11.0175	7.30862e-22	6.34069e-20	38.9794
ABCG2	-5503.43	511.5	-11.0171	7.3297e-22	6.34954e-20	38.9766
AP3S2	-1804.53	1247.26	-11.004	7.98909e-22	6.9105e-20	38.8913
ATP6V0D1	-6344.28	5400.99	-11.0034	8.02071e-22	6.92759e-20	38.8874
IGHV3-76	-36.8738	7.32778	-10.9952	8.46659e-22	7.3019e-20	38.8338
IGHV3OR16-15	-21.1548	4.45	-10.9854	9.03425e-22	7.77998e-20	38.7696
S100B	-479.139	131.389	-10.9833	9.16124e-22	7.87772e-20	38.7557
RHOF	-644.263	266.267	-10.9816	9.26322e-22	7.9537e-20	38.7448
RP11-812E19.9	-86.9498	17.0222	-10.9715	9.9054e-22	8.49261e-20	38.6784
ST8SIA3	-33.1253	4.80556	-10.9709	9.94502e-22	8.51407e-20	38.6745
KRT9	-16.3749	3.5	-10.9685	1.01011e-21	8.63507e-20	38.659
F2RL1	-6906.73	4624.48	-10.9615	1.05795e-21	9.03081e-20	38.6132
DPT	-4518.89	732.322	-10.96	1.06865e-21	9.10878e-20	38.6033
RP5-1148A21.3	-129.538	59.3556	-10.9596	1.07139e-21	9.11884e-20	38.6007
ANK2	-1699.05	349.739	-10.9516	1.12919e-21	9.59682e-20	38.5487
NDRG2	-5930.43	3667.88	-10.9469	1.16478e-21	9.88489e-20	38.518
CDHR5	-39562.3	7989.12	-10.9465	1.16784e-21	9.89647e-20	38.5154
MAFA	-15.9986	3.77222	-10.943	1.19554e-21	1.01165e-19	38.4922
LINC01013	-20.4385	5.42222	-10.9403	1.21718e-21	1.02847e-19	38.4744
CASC18	-19.5417	4.63889	-10.94	1.21912e-21	1.02862e-19	38.4728
SLC20A1	-6886.63	3372.43	-10.9316	1.2889e-21	1.08593e-19	38.4177
SLC7A14	-119.278	15.6444	-10.9252	1.3441e-21	1.13081e-19	38.3762
STK17B	-3075.87	1818.51	-10.9202	1.3892e-21	1.16676e-19	38.3435
ABHD5	-926.935	631.933	-10.9201	1.39084e-21	1.16676e-19	38.3424
SRPX	-1134	302.517	-10.9164	1.42434e-21	1.19315e-19	38.3188
MYPN	-91.6195	21.7667	-10.911	1.47646e-21	1.23505e-19	38.2832
NR3C1	-1866.77	800.517	-10.9038	1.54851e-21	1.29346e-19	38.236
HRCT1	-1427.21	386.017	-10.9013	1.57412e-21	1.31221e-19	38.2198
IGHV3-11	-3801.7	855.172	-10.9012	1.57545e-21	1.31221e-19	38.219
RIMS4	-126.618	19.45	-10.886	1.74159e-21	1.44852e-19	38.1197
MARVELD3	-3032.74	1948.06	-10.8788	1.82568e-21	1.5163e-19	38.073
HSD3B2	-826.022	74.3278	-10.8776	1.84027e-21	1.52625e-19	38.0651
RP11-528A4.2	-160.391	66.5778	-10.8692	1.94472e-21	1.61059e-19	38.0105
P2RY12	-55.4242	16.6556	-10.8633	2.02211e-21	1.67231e-19	37.9719
IGHV3OR16-9	-89.9751	18.6	-10.8565	2.11428e-21	1.74606e-19	37.9277
CRHBP	-28.3137	8.03889	-10.8548	2.13902e-21	1.764e-19	37.9162
CMA1	-121.849	20.5667	-10.8428	2.31523e-21	1.90662e-19	37.8378
APOBR	-7018.32	2756.48	-10.8359	2.42174e-21	1.99152e-19	37.7933
PPARGC1A	-1822.25	761.744	-10.8322	2.48139e-21	2.03771e-19	37.7692
IGLV5-45	-639.088	146.222	-10.8277	2.55695e-21	2.0968e-19	37.7395
ARHGEF37	-1382.85	698.561	-10.8248	2.60512e-21	2.13331e-19	37.7211
PP7080	-13539.9	2680	-10.8218	2.6586e-21	2.17406e-19	37.7009
VILL	-7505.21	3356.14	-10.8172	2.73949e-21	2.23708e-19	37.6713
HNRNPA1P33	-14.1589	3.09444	-10.801	3.04777e-21	2.48534e-19	37.5657
FAM161B	-259.795	180.122	-10.7992	3.08364e-21	2.51108e-19	37.5541
RP11-1100L3.4	-8.11423	1.93333	-10.7944	3.18295e-21	2.58834e-19	37.5227
ATP8A2	-80.0364	31.2056	-10.7719	3.69166e-21	2.99785e-19	37.376
GALNT16	-282.943	75.7222	-10.7713	3.70532e-21	3.00476e-19	37.3723
LARGE	-1969.8	1273.92	-10.7622	3.93436e-21	3.18607e-19	37.3129
SLC16A9	-2139.38	688.589	-10.7577	4.05406e-21	3.27846e-19	37.2833
C2orf40	-286.033	40.3944	-10.7551	4.12194e-21	3.32873e-19	37.2668
PAG1	-3475.11	1598.02	-10.7535	4.16716e-21	3.36061e-19	37.256
ANO10	-3161.94	2201.42	-10.753	4.18035e-21	3.3666e-19	37.2529
PPP1R16B	-949.05	397.8	-10.7519	4.21071e-21	3.38638e-19	37.2457
SLC9A3	-16883.3	2677.31	-10.7471	4.3449e-21	3.48949e-19	37.2147
NACAD	-242.71	78.05	-10.7453	4.39605e-21	3.52572e-19	37.2031
HMGCS2	-43958.3	11578.7	-10.7446	4.41655e-21	3.5373e-19	37.1985
KCNK3	-226.706	51.2056	-10.7359	4.67727e-21	3.74099e-19	37.1417
RP11-449D8.5	-4.31737	0.994444	-10.7282	4.92096e-21	3.93051e-19	37.0914
RP11-102N12.3	-29.9185	12.55	-10.7182	5.256e-21	4.19238e-19	37.0262
IGLJ1	-13.965	2.96667	-10.7168	5.30361e-21	4.22458e-19	37.0173
RP11-654D12.2	-8.37356	1.53889	-10.7159	5.33632e-21	4.24485e-19	37.0112
THRB	-1497.59	510.183	-10.7107	5.51911e-21	4.38428e-19	36.9779
HRASLS2	-541.819	94.3889	-10.709	5.58367e-21	4.42953e-19	36.9664
MEIS3P1	-189.364	75.9278	-10.7068	5.66585e-21	4.48863e-19	36.9519
EPB41L4A-AS2	-37.1704	14.2833	-10.7	5.92483e-21	4.68744e-19	36.9077
LRRC1	-2630.95	2092.06	-10.6996	5.94009e-21	4.69315e-19	36.9051
PAMR1	-603.33	249.706	-10.6991	5.95968e-21	4.70227e-19	36.9019
HCG23	-6.89037	1.76111	-10.6976	6.01842e-21	4.7422e-19	36.8922
IGLV7-43	-1671.45	305.956	-10.695	6.11987e-21	4.81564e-19	36.8756
TTLL6	-438.721	126.272	-10.6912	6.27527e-21	4.93128e-19	36.8508
ADAMTSL1	-683.704	255.367	-10.6896	6.34244e-21	4.97737e-19	36.8403
NRXN1	-554.772	59.8333	-10.686	6.49212e-21	5.08799e-19	36.8172
VSTM2A-OT1	-7.40304	0.977778	-10.6712	7.15704e-21	5.60159e-19	36.7207
FABP1	-122336	30984.3	-10.6673	7.34013e-21	5.73435e-19	36.6957
PIGZ	-4140.58	1582.84	-10.6672	7.34631e-21	5.73435e-19	36.6948
CPEB3	-410.435	277.361	-10.6574	7.83652e-21	6.10883e-19	36.6309
XKR4	-188.436	22.25	-10.6538	8.02523e-21	6.24759e-19	36.6073
CPEB1	-125.26	27.0944	-10.6513	8.15674e-21	6.34151e-19	36.5912
RELN	-444.463	109.483	-10.6451	8.49334e-21	6.59442e-19	36.5512
CHST5	-1202.93	286.717	-10.6438	8.56624e-21	6.64219e-19	36.5428
PLCG2	-1280.4	547.994	-10.6376	8.92227e-21	6.90908e-19	36.5024
RP11-425D10.10	-38.0889	15.7389	-10.6284	9.47751e-21	7.32932e-19	36.4427
DUSP21	-4.85629	0.494444	-10.6086	1.07958e-20	8.33777e-19	36.3138
HMCN2	-3006.45	902.456	-10.6057	1.10025e-20	8.48618e-19	36.295
IGHV3-72	-1938.96	391.922	-10.5982	1.15548e-20	8.90036e-19	36.2465
IL16	-942.115	419.85	-10.5896	1.22278e-20	9.40639e-19	36.1905
ITPKA	-1613.3	671.756	-10.5834	1.27293e-20	9.77927e-19	36.1507
RP13-497K6.1	-48.626	7.11667	-10.5745	1.34992e-20	1.03571e-18	36.0926
GPR142	-10.7545	3.02222	-10.5729	1.36379e-20	1.04498e-18	36.0825
TRPV3	-626.113	117.644	-10.5692	1.39757e-20	1.06946e-18	36.0583
TMEM35	-733.866	126.289	-10.5673	1.41471e-20	1.08116e-18	36.0462
CDKN2B-AS	-14.3068	2.11111	-10.5495	1.58977e-20	1.21336e-18	35.9308
SLC22A17	-685.008	254.772	-10.5485	1.60082e-20	1.2202e-18	35.9239
DUSP26	-75.088	20.4889	-10.5405	1.68692e-20	1.28415e-18	35.872
SCGB2A1	-132.69	32.2778	-10.5274	1.83741e-20	1.39689e-18	35.7875
GNG3	-44.3349	16.4056	-10.5245	1.873e-20	1.42209e-18	35.7685
KCNC1	-16.9595	5.65	-10.5154	1.98823e-20	1.50762e-18	35.7094
RHOU	-3560.07	1873.66	-10.5107	2.05033e-20	1.55269e-18	35.679
C7orf31	-575.176	292.133	-10.5087	2.07706e-20	1.57089e-18	35.6662
RGMA	-1638.84	455.594	-10.5045	2.13543e-20	1.61296e-18	35.6387
OSBPL1A	-1972.78	1086.39	-10.5029	2.15818e-20	1.62804e-18	35.6282
IGFBP6	-1622.29	448.411	-10.4944	2.28151e-20	1.71884e-18	35.5732
AC103563.5	-71.0064	11.5833	-10.4936	2.29365e-20	1.72576e-18	35.568
SIDT2	-2937.98	2022.67	-10.4906	2.33793e-20	1.75682e-18	35.5491
ABCC8	-63.1175	16.1333	-10.4824	2.46737e-20	1.8517e-18	35.4957
NEDD4L	-5200.21	3157.43	-10.4811	2.48799e-20	1.86478e-18	35.4875
MBNL1-AS1	-890.485	236.367	-10.48	2.50644e-20	1.8762e-18	35.4802
IGKV6-21	-469.018	95.8556	-10.4789	2.52483e-20	1.88754e-18	35.473
KIAA1161	-6790.97	4341.03	-10.4752	2.58558e-20	1.93049e-18	35.4494
CCDC158	-34.9222	14.6	-10.465	2.76462e-20	2.06153e-18	35.3832
LXN	-1136.73	725.828	-10.4576	2.90217e-20	2.16134e-18	35.3351
ATP1A2	-2196.26	264.361	-10.4502	3.04565e-20	2.26409e-18	35.2874
RP11-542M13.2	-68.0525	14.4778	-10.4501	3.0479e-20	2.26409e-18	35.2866
FRRS1L	-108.528	19.6944	-10.4447	3.15651e-20	2.34179e-18	35.252
SEPP1	-35899.2	6070.02	-10.4438	3.17496e-20	2.35249e-18	35.2462
HSPB6	-3991.27	769.911	-10.4406	3.24364e-20	2.40033e-18	35.225
HSD3BP2	-22.9217	2.27222	-10.4399	3.25694e-20	2.40712e-18	35.221
CGN	-11040.8	7041.79	-10.4379	3.30044e-20	2.43619e-18	35.2079
LRRN4CL	-298.95	118.794	-10.4309	3.45538e-20	2.54734e-18	35.1625
TCP11L1	-443.857	356.661	-10.4295	3.48677e-20	2.56724e-18	35.1535
RP4-651E10.4	-15.0884	4.61667	-10.4228	3.64354e-20	2.67928e-18	35.11
RP11-807H22.5	-82.433	7.36667	-10.4137	3.86715e-20	2.84014e-18	35.0511
RPS15AP11	-27.222	13.2056	-10.4121	3.90638e-20	2.86503e-18	35.0411
FLVCR2	-1001.06	334.928	-10.4119	3.91086e-20	2.86503e-18	35.0399
IQGAP2	-4914.14	2327.85	-10.4111	3.93141e-20	2.87648e-18	35.0347
OPN3	-795.468	378.444	-10.3915	4.47071e-20	3.26697e-18	34.9075
RP11-640L9.1	-13.3731	4.43889	-10.3831	4.72045e-20	3.44516e-18	34.8538
SYNM	-23151.9	3074.68	-10.3715	5.09446e-20	3.71349e-18	34.7783
RP1-278O22.1	-171.388	54.0667	-10.3619	5.42384e-20	3.94865e-18	34.7163
HMOX1	-3533.77	1561.6	-10.3604	5.47466e-20	3.98068e-18	34.7071
2021-03-02	-1078.46	933.194	-10.3592	5.51802e-20	4.00723e-18	34.6993
IGSF11	-49.2953	9.11111	-10.356	5.63374e-20	4.08618e-18	34.6787
PLA2G10	-315.324	126.911	-10.3518	5.79222e-20	4.19591e-18	34.6513
C1QL1	-59.9327	27.0111	-10.3498	5.86938e-20	4.24462e-18	34.6382
AC007556.3	-6.19254	1.17778	-10.3496	5.874e-20	4.24462e-18	34.6374
GFRA3	-287.233	50.5889	-10.3443	6.08168e-20	4.38926e-18	34.603
CPT1A	-10741	7518.19	-10.3397	6.26913e-20	4.51896e-18	34.573
NPY6R	-526.339	68.9056	-10.3387	6.3102e-20	4.54296e-18	34.5666
ASXL3	-204.592	63.2611	-10.3197	7.14183e-20	5.1339e-18	34.4441
TMEM127	-6037.13	5696.27	-10.3195	7.14861e-20	5.1339e-18	34.4431
CTNNA3	-146.433	25.45	-10.3054	7.83848e-20	5.62242e-18	34.352
RP3-422G23.4	-18.866	3.18889	-10.2972	8.26841e-20	5.92353e-18	34.2991
FRMD3	-1187.77	384.394	-10.2909	8.61244e-20	6.16243e-18	34.2588
GNG8	-18.123	4.41667	-10.2872	8.82787e-20	6.30885e-18	34.2344
CASD1	-1358.95	1017.74	-10.2827	9.08548e-20	6.48501e-18	34.2059
ASPA	-462.549	56.0111	-10.2795	9.27692e-20	6.61357e-18	34.1853
AKR1B10	-7214.11	1334.99	-10.2773	9.41435e-20	6.70336e-18	34.1707
RP11-371M22.1	-2.53754	0.261111	-10.2748	9.56943e-20	6.80548e-18	34.1546
PPARGC1B	-1544.16	1020.9	-10.2702	9.85589e-20	7.00068e-18	34.1254
C7	-5600.01	996.817	-10.2697	9.89339e-20	7.01878e-18	34.1216
METTL24	-124.278	24.4667	-10.2651	1.01891e-19	7.21982e-18	34.0925
BCHE	-775.362	101.406	-10.2542	1.09433e-19	7.74481e-18	34.0218
MYL6	-35872.1	33571.7	-10.2509	1.11774e-19	7.90094e-18	34.0009
MYO1A	-17594.8	4690.43	-10.2497	1.1265e-19	7.95317e-18	33.9932
HS3ST6	-61.9401	6.53333	-10.2479	1.13979e-19	8.03731e-18	33.9816
LITAF	-10011.1	7498.91	-10.2448	1.16331e-19	8.1933e-18	33.9613
SPATA31E1	-5.11147	0.95	-10.243	1.17684e-19	8.27858e-18	33.9499
LINC00940	-63.2294	19.1833	-10.2304	1.27771e-19	8.97734e-18	33.8686
RPH3A	-26.3924	6.74444	-10.2296	1.28436e-19	9.0132e-18	33.8634
ACTG2	-77364.7	11445.8	-10.2262	1.31257e-19	9.20014e-18	33.8419
CSRP1	-35678.5	13087.5	-10.2196	1.37007e-19	9.59167e-18	33.7995
NCAM1	-1378.79	292.944	-10.218	1.38469e-19	9.68236e-18	33.789
HEPACAM2	-3562.87	744.989	-10.2064	1.49373e-19	1.04324e-17	33.714
SCN3B	-111.936	37.5333	-10.2052	1.50495e-19	1.04982e-17	33.7066
FAM46C	-4106.35	1419.76	-10.1989	1.56751e-19	1.09215e-17	33.6663
IGHA1	-327845	65455.1	-10.1987	1.56967e-19	1.09235e-17	33.665
PPP1R14A	-1226.66	330.006	-10.1952	1.60607e-19	1.11635e-17	33.6423
C10orf105	-8.53524	2.38889	-10.1919	1.64055e-19	1.13896e-17	33.6213
ATL1	-373.717	262.428	-10.1854	1.7112e-19	1.1866e-17	33.5796
CAND2	-226.111	72.45	-10.1762	1.81674e-19	1.25829e-17	33.5203
TRPC7	-19.9954	6.83333	-10.1726	1.85992e-19	1.28667e-17	33.4971
RP11-678G14.3	-34.293	5.72222	-10.1579	2.04623e-19	1.41388e-17	33.4027
SPECC1L	-1577.08	1345.13	-10.1564	2.06619e-19	1.42599e-17	33.3931
CACNG7	-6.37172	1.55	-10.153	2.11339e-19	1.45684e-17	33.3707
TRIM36	-834.244	431.622	-10.1449	2.22689e-19	1.53327e-17	33.319
MTM1	-1619.12	1145.66	-10.1446	2.23136e-19	1.53454e-17	33.317
LDB3	-1029.72	162.572	-10.1384	2.32267e-19	1.59546e-17	33.2773
CHST8	-11.514	3.39444	-10.1377	2.33324e-19	1.60083e-17	33.2728
HSD17B11	-9176.49	5414.57	-10.1338	2.39311e-19	1.63998e-17	33.2478
RCAN1	-3364.31	1875.21	-10.1334	2.39895e-19	1.64205e-17	33.2454
AHNAK	-58682.8	28765.2	-10.1329	2.40674e-19	1.64546e-17	33.2421
SFTA1P	-32.4146	8.31111	-10.1304	2.44723e-19	1.67118e-17	33.2256
NCOA4	-9650.35	8433.47	-10.1298	2.45649e-19	1.67555e-17	33.2219
CHL1	-676.879	202.083	-10.1295	2.46061e-19	1.6764e-17	33.2203
CHCHD10	-3783.54	2491.95	-10.1205	2.60857e-19	1.77514e-17	33.1625
GPR37L1	-286.87	122.233	-10.1159	2.68819e-19	1.82719e-17	33.1328
CTD-2026C7.1	-29.8019	5.88889	-10.1054	2.87714e-19	1.95334e-17	33.0656
SEC14L5	-115.32	30.3167	-10.0957	3.06449e-19	2.07812e-17	33.0032
IGHV4-55	-346.491	81.9944	-10.0939	3.10076e-19	2.10028e-17	32.9915
MFSD4	-2202.51	675.094	-10.0919	3.14127e-19	2.12525e-17	32.9787
KCNB1	-299.017	45.6556	-10.0884	3.2132e-19	2.1714e-17	32.9563
ADCYAP1R1	-247.468	32.7889	-10.0829	3.32992e-19	2.24768e-17	32.921
EPAS1	-11032.5	7105.73	-10.0809	3.37223e-19	2.27361e-17	32.9085
P2RY4	-70.2432	9.52222	-10.0799	3.39445e-19	2.28595e-17	32.902
PRSS36	-209.194	121.222	-10.079	3.41381e-19	2.29634e-17	32.8964
TNFSF10	-5508.47	3455.44	-10.0752	3.49978e-19	2.35146e-17	32.8718
PLS1	-16631.9	10251.6	-10.0739	3.53033e-19	2.36925e-17	32.8632
RP11-320N21.2	-18.9857	4.07778	-10.0719	3.57524e-19	2.39664e-17	32.8507
KIRREL3	-78.6803	25.6944	-10.0704	3.61077e-19	2.41768e-17	32.8409
BARX2	-1146.6	356.361	-10.0674	3.68145e-19	2.46218e-17	32.8217
LGALS2	-2740.61	468.172	-10.0666	3.70044e-19	2.47205e-17	32.8166
IGHV3OR15-7	-77.3869	18.8944	-10.0655	3.72762e-19	2.48737e-17	32.8094
UG0898H09	-76.9894	13.9556	-10.0557	3.97203e-19	2.64743e-17	32.7466
TJP3	-7385.01	4917.12	-10.0536	4.02697e-19	2.68099e-17	32.733
HADHA	-14477.1	12591.8	-10.0516	4.07898e-19	2.71252e-17	32.7203
RBPMS2	-1057.05	197.828	-10.049	4.14669e-19	2.75441e-17	32.704
PCOLCE2	-594.784	123.25	-10.0404	4.38492e-19	2.90935e-17	32.6488
CD177P1	-267.383	22.4667	-10.0302	4.68322e-19	3.10373e-17	32.5837
TAGLN3	-101.839	16.4389	-10.0291	4.71681e-19	3.12245e-17	32.5766
CDKN1A	-12958.4	7307.91	-10.0289	4.72321e-19	3.12315e-17	32.5753
HADHB	-6651.73	5425.98	-10.0115	5.2862e-19	3.49146e-17	32.4639
CNN1	-27000.7	4503.77	-10.0088	5.37933e-19	3.54896e-17	32.4466
SCN3A	-103.921	37.6611	-10.0065	5.46099e-19	3.59877e-17	32.4317
CTSLP8	-3.4597	0.405556	-10.0054	5.50073e-19	3.62087e-17	32.4245
ELMSAN1	-2573.98	2005.46	-10.0004	5.67996e-19	3.73464e-17	32.3928
KIF5A	-334.746	92.1222	-9.99401	5.92037e-19	3.88833e-17	32.3518
REEP2	-279.638	85.25	-9.99229	5.98663e-19	3.92743e-17	32.3408
CAV1	-6750.16	2112.81	-9.9896	6.092e-19	3.99207e-17	32.3236
RP11-532F6.3	-131.918	40.4556	-9.98196	6.40015e-19	4.1893e-17	32.2748
FAM107B	-4056.6	2324.46	-9.98094	6.44283e-19	4.21251e-17	32.2682
OAF	-4925.8	4058.8	-9.97821	6.5573e-19	4.28256e-17	32.2508
ENTPD8	-4678.57	1162.79	-9.97266	6.79703e-19	4.43417e-17	32.2153
EGLN1	-2908.82	2690.49	-9.96985	6.92174e-19	4.51049e-17	32.1973
TPSG1	-1048.62	264.656	-9.96843	6.98522e-19	4.54678e-17	32.1883
PARM1	-17156.5	8892.67	-9.96477	7.15254e-19	4.65051e-17	32.1648
MAPK3	-8950.03	6255.67	-9.95956	7.39767e-19	4.80454e-17	32.1315
MGAT4A	-5018.41	3343.57	-9.95765	7.48954e-19	4.8588e-17	32.1193
EPB41L4B	-8466.89	5530.14	-9.95483	7.62703e-19	4.9425e-17	32.1013
IGKV3OR2-268	-148.785	30.4222	-9.94788	7.97723e-19	5.16371e-17	32.0569
AC104699.1	-29.7517	8.62778	-9.9473	8.00717e-19	5.17735e-17	32.0532
CTD-3179P9.1	-4.69093	0.955556	-9.9463	8.05905e-19	5.20473e-17	32.0468
TRIM40	-525.46	119.567	-9.94614	8.06734e-19	5.20473e-17	32.0458
CADM2	-178.12	23.7444	-9.94521	8.11611e-19	5.23041e-17	32.0399
RP11-96D1.6	-75.222	19.6722	-9.94077	8.35239e-19	5.37675e-17	32.0115
HCN4	-10.9645	3.28889	-9.93929	8.43235e-19	5.42224e-17	32.0021
RP11-51F16.9	-26.2308	16.8944	-9.93193	8.84312e-19	5.68012e-17	31.955
BEND5	-98.6126	32.3556	-9.93041	8.93004e-19	5.72965e-17	31.9453
GCSAML	-49.743	14.3111	-9.92724	9.11468e-19	5.8417e-17	31.9251
PAFAH2	-2122.3	1542.06	-9.92572	9.20498e-19	5.89311e-17	31.9154
VIP	-1887.58	412.822	-9.92175	9.4436e-19	6.03925e-17	31.89
PACSIN2	-5877.16	4910.07	-9.91871	9.63083e-19	6.15224e-17	31.8706
IGKV1OR2-108	-492.89	90.8611	-9.91022	1.01736e-18	6.49185e-17	31.8164
SIGLEC6	-52.345	17.1278	-9.90829	1.03009e-18	6.5659e-17	31.8041
CCL14	-118.24	47.3	-9.90586	1.04639e-18	6.66255e-17	31.7886
PLD1	-2204.72	1484.21	-9.90183	1.07391e-18	6.83032e-17	31.7629
IGSF10	-314.959	86.7111	-9.89979	1.08816e-18	6.91342e-17	31.7499
AMICA1	-946.407	422.483	-9.89896	1.09399e-18	6.94293e-17	31.7446
PCSK5	-3300.18	947.244	-9.8912	1.15013e-18	7.29128e-17	31.6951
RXRA	-5074.54	4021.57	-9.88181	1.22196e-18	7.73826e-17	31.6352
MYLK	-38214	8156.09	-9.8809	1.22916e-18	7.77542e-17	31.6294
ALK	-35.9346	8.12222	-9.87021	1.31682e-18	8.3209e-17	31.5613
IGHV3OR16-6	-61.7858	11.0611	-9.86417	1.36917e-18	8.64238e-17	31.5227
PCDH10	-53.7863	11.9444	-9.85912	1.41447e-18	8.91866e-17	31.4905
RP11-479A21.1	-6.93505	1.48889	-9.85482	1.4542e-18	9.15928e-17	31.4631
PYGM	-649.128	102.6	-9.85165	1.48416e-18	9.33788e-17	31.443
TCF7L1	-538.515	296.917	-9.84824	1.51711e-18	9.53496e-17	31.4213
IGLV10-54	-1665.94	269.533	-9.84608	1.53839e-18	9.65504e-17	31.4075
C3orf70	-936.555	496.778	-9.84597	1.53953e-18	9.65504e-17	31.4068
SORCS1	-386.394	59.5889	-9.84304	1.56882e-18	9.82822e-17	31.3881
TP53I3	-1999.89	1471.7	-9.84153	1.58412e-18	9.91338e-17	31.3785
IGKV3-20	-15128.6	4138.1	-9.8405	1.59474e-18	9.96915e-17	31.3719
LIMA1	-13987.8	8482.27	-9.83408	1.66198e-18	1.03784e-16	31.3311
JOSD1	-4893.39	4143.79	-9.83178	1.6868e-18	1.05221e-16	31.3164
IGHV3-38	-73.7743	17.4	-9.82696	1.74003e-18	1.08426e-16	31.2857
TMEM30B	-4605.96	3258.69	-9.82285	1.78669e-18	1.11215e-16	31.2596
EYA2	-1032.42	248.833	-9.81839	1.83871e-18	1.14331e-16	31.2312
CYB561A3	-2007.94	1774.23	-9.81772	1.8466e-18	1.147e-16	31.2269
SESN2	-1761.41	1159.26	-9.81702	1.855e-18	1.15099e-16	31.2225
ZBTB16	-175.804	41.7389	-9.81417	1.88932e-18	1.17104e-16	31.2043
CXCL12	-5103.14	1521.19	-9.81175	1.91898e-18	1.18816e-16	31.1889
SLC35F1	-109.57	30.7278	-9.80879	1.95584e-18	1.2097e-16	31.1701
MGST3	-5202.12	4570.98	-9.8052	2.00159e-18	1.23625e-16	31.1473
TMEM59	-16084.2	13695.4	-9.80509	2.003e-18	1.23625e-16	31.1466
SLC35G1	-972.79	566.467	-9.80196	2.04382e-18	1.26011e-16	31.1266
CRADD	-427.544	368.95	-9.79961	2.07488e-18	1.27791e-16	31.1117
IGHV2-5	-852.813	174.394	-9.78601	2.26461e-18	1.3933e-16	31.0252
LRRC75A	-1909.63	1227.37	-9.78505	2.27859e-18	1.40042e-16	31.0191
HAND2	-1265.77	200.183	-9.78191	2.32513e-18	1.42752e-16	30.9991
CTA-150C2.13	-15.7328	3.71111	-9.77962	2.3596e-18	1.44716e-16	30.9846
PTP4A1	-13822.6	9818.22	-9.77486	2.43289e-18	1.49055e-16	30.9543
TNFRSF1A	-6017.8	5432.12	-9.76756	2.54972e-18	1.56048e-16	30.9079
SNTG2	-17.1893	4.74444	-9.76292	2.62696e-18	1.60608e-16	30.8784
KCNN3	-790.356	225.033	-9.75875	2.69831e-18	1.64797e-16	30.8519
CNGA3	-170.246	24.05	-9.75846	2.70334e-18	1.64932e-16	30.8501
MT1DP	-38.4993	9.58889	-9.75817	2.70838e-18	1.65067e-16	30.8483
C1orf186	-103.69	35.6444	-9.75228	2.81277e-18	1.71251e-16	30.8109
C1QTNF7	-328.123	85.3444	-9.75086	2.83855e-18	1.7264e-16	30.8018
GYPC	-901.729	407.011	-9.74902	2.8724e-18	1.74517e-16	30.7901
RAP1A	-3238.01	2953.31	-9.74234	2.99834e-18	1.81979e-16	30.7477
PI16	-1157.37	173.911	-9.73514	3.14029e-18	1.90397e-16	30.702
AF064860.7	-14.9737	3.8	-9.73236	3.19681e-18	1.93622e-16	30.6843
MEIS3P2	-19.7987	8.93889	-9.72979	3.24993e-18	1.96636e-16	30.668
RP11-321G12.1	-291.28	64.3722	-9.72729	3.30255e-18	1.99613e-16	30.6522
AP000472.2	-27.5122	4.70556	-9.72538	3.34321e-18	2.01713e-16	30.6401
PSMD10P2	-42.5555	16.1333	-9.72534	3.34421e-18	2.01713e-16	30.6398
RIMKLA	-1089.84	602.328	-9.72432	3.3662e-18	2.0283e-16	30.6333
GNAO1	-1857.75	315.422	-9.72228	3.41044e-18	2.05284e-16	30.6204
FAM46B	-439.462	98.7389	-9.71808	3.50362e-18	2.10675e-16	30.5937
NOVA1	-238.579	60.3444	-9.71546	3.56313e-18	2.14033e-16	30.5771
PPY	-10.3837	1.82778	-9.71393	3.59829e-18	2.15923e-16	30.5674
TRPC7-AS1	-32.5481	12.0333	-9.71302	3.61933e-18	2.16963e-16	30.5616
KIAA1644	-1015.36	184.356	-9.71253	3.63066e-18	2.17419e-16	30.5585
CPTP	-2430.86	1833.16	-9.7053	3.80323e-18	2.2752e-16	30.5126
MST1L	-191.973	48.1222	-9.70314	3.85615e-18	2.30449e-16	30.499
RP11-567C2.1	-21.6789	5.19444	-9.70273	3.86633e-18	2.30821e-16	30.4964
PLSCR4	-1300.34	830.572	-9.70208	3.88262e-18	2.31557e-16	30.4922
FLT3	-63.052	24.6556	-9.69847	3.97353e-18	2.36737e-16	30.4693
CLCN2	-3277.02	2067.73	-9.69717	4.00682e-18	2.38477e-16	30.4611
IGHV3-21	-3354.05	864.878	-9.69207	4.14006e-18	2.46156e-16	30.4287
GPR119	-7.86596	1.39444	-9.69094	4.17008e-18	2.47689e-16	30.4216
PGM5	-5747.37	1149.48	-9.68531	4.32335e-18	2.56532e-16	30.3859
LINC01135	-12.707	6.67222	-9.68467	4.3412e-18	2.57329e-16	30.3818
SCAMP2	-9882.71	7964.42	-9.68087	4.4482e-18	2.63405e-16	30.3578
BDKRB2	-1690.9	959.989	-9.67546	4.60521e-18	2.72426e-16	30.3235
SLC2A4	-843.492	232.35	-9.67012	4.76572e-18	2.81635e-16	30.2896
PPP1R14D	-3498.49	1962.56	-9.66406	4.95415e-18	2.92475e-16	30.2513
NGB	-71.1211	7.4	-9.65982	5.09075e-18	3.00236e-16	30.2244
SLC35D1	-4816.84	3356.82	-9.65744	5.1689e-18	3.04538e-16	30.2093
SALL2	-330.141	113.933	-9.65313	5.31374e-18	3.12755e-16	30.182
RP5-965F6.2	-7.61538	2.55	-9.64323	5.66166e-18	3.32898e-16	30.1193
RP11-6O2.3	-199.38	39.3278	-9.63512	5.96342e-18	3.50288e-16	30.068
CCDC152	-341.923	84.2333	-9.61805	6.65158e-18	3.90317e-16	29.96
FLNC	-22286.5	3866.67	-9.61735	6.68142e-18	3.91675e-16	29.9556
IGLV2-14	-8091.42	2217.27	-9.61577	6.7497e-18	3.95054e-16	29.9456
CHGB	-882.257	165.461	-9.6157	6.7526e-18	3.95054e-16	29.9451
FXYD3	-46754.9	23224.3	-9.61137	6.94214e-18	4.05736e-16	29.9178
IGSF3	-2104.07	1492.81	-9.61042	6.98471e-18	4.07816e-16	29.9117
ABCD2	-79.4873	31.5611	-9.60664	7.1553e-18	4.17359e-16	29.8879
LRRC4B	-84.2847	44.0333	-9.60005	7.4633e-18	4.3489e-16	29.8462
NDN	-1086.12	474.783	-9.59918	7.50528e-18	4.369e-16	29.8407
MFAP4	-6959.7	2345.33	-9.59633	7.6433e-18	4.44492e-16	29.8227
TTC38	-7201.54	4656.49	-9.59534	7.69155e-18	4.46852e-16	29.8164
RP11-800A3.4	-557.017	265.828	-9.59384	7.76593e-18	4.50725e-16	29.8069
CYP1B1-AS1	-39.2685	17.6444	-9.58668	8.1297e-18	4.71369e-16	29.7617
FAM129A	-6005.43	1193.68	-9.58322	8.31165e-18	4.81441e-16	29.7398
RP11-209E8.1	-65.6518	7.16667	-9.58036	8.46491e-18	4.89832e-16	29.7217
SYT4	-92.0751	16.8056	-9.57498	8.76107e-18	5.06468e-16	29.6878
PCSK7	-3038.86	2548.31	-9.57435	8.79636e-18	5.08005e-16	29.6838
ZNF835	-40.5214	15.8667	-9.57291	8.87773e-18	5.12198e-16	29.6747
FAM132A	-496.89	173.689	-9.56629	9.26085e-18	5.33774e-16	29.6329
CTC-558O2.2	-5.64394	1.99444	-9.5641	9.39151e-18	5.40771e-16	29.6191
PDGFD	-556.453	285.889	-9.56262	9.48072e-18	5.4537e-16	29.6097
AQP7	-607.651	180.389	-9.54883	1.03535e-17	5.94988e-16	29.5227
HTR4	-237.189	64.6333	-9.548	1.04087e-17	5.97572e-16	29.5174
LINC01080	-8.80654	1.98333	-9.54762	1.04338e-17	5.98428e-16	29.5151
TMEM108	-63.5578	26.9556	-9.54256	1.07766e-17	6.17479e-16	29.4831
DPP6	-675.964	69.3944	-9.54158	1.08441e-17	6.20738e-16	29.4769
FRMD6-AS2	-8.45463	1.69444	-9.53121	1.15864e-17	6.61824e-16	29.4115
IGHV3-47	-53.7821	13.7944	-9.5312	1.15869e-17	6.61824e-16	29.4115
ATG4D	-1312.22	1157.24	-9.53108	1.15958e-17	6.61824e-16	29.4107
RP11-885N19.6	-6.1497	1.29444	-9.53079	1.16171e-17	6.62391e-16	29.4089
ARRB1	-2275.91	1764.23	-9.52897	1.1753e-17	6.69483e-16	29.3974
TMEM253	-615.857	101.544	-9.52828	1.18052e-17	6.71801e-16	29.393
TMEM9B	-2839.24	2909.89	-9.51959	1.24779e-17	7.09394e-16	29.3382
MYH11	-266089	34668.5	-9.51875	1.2545e-17	7.12517e-16	29.3329
AVPI1	-1773.89	1275.22	-9.51543	1.28136e-17	7.27065e-16	29.312
ECE1	-10376.2	7895.65	-9.51185	1.31097e-17	7.4314e-16	29.2894
SLITRK3	-103.042	18.8611	-9.51021	1.32468e-17	7.50187e-16	29.2791
HLF	-494.075	153.839	-9.50679	1.35394e-17	7.66013e-16	29.2576
RNASEL	-930.085	659.472	-9.50535	1.36642e-17	7.72325e-16	29.2485
DYRK2	-4117.38	3565.99	-9.49848	1.42762e-17	8.06138e-16	29.2052
MIR497HG	-56.6578	21.5111	-9.49361	1.4726e-17	8.30732e-16	29.1745
CLMN	-4646.37	2875.05	-9.49257	1.48242e-17	8.35462e-16	29.168
AC104024.1	-14.4855	3.02222	-9.49121	1.49532e-17	8.41922e-16	29.1594
CASQ2	-1292.06	210.644	-9.48914	1.51513e-17	8.52254e-16	29.1464
LINC00402	-19.8719	5.25556	-9.48808	1.52539e-17	8.57196e-16	29.1397
RP11-131H24.4	-24.0659	5.67222	-9.48366	1.56895e-17	8.80832e-16	29.1119
DPF3	-344.995	106.306	-9.47918	1.61444e-17	9.04813e-16	29.0837
SETBP1	-793.336	309.883	-9.47915	1.61477e-17	9.04813e-16	29.0835
RSPO2	-483.315	55.2833	-9.47554	1.65231e-17	9.24961e-16	29.0607
GFI1B	-73.6891	19.0944	-9.46391	1.77933e-17	9.9511e-16	28.9876
SLC30A8	-17.5537	3.48333	-9.45869	1.83949e-17	1.02777e-15	28.9547
LINC01537	-20.4486	5.56667	-9.45406	1.89451e-17	1.0575e-15	28.9256
GDNF	-197.638	60.8667	-9.45104	1.93124e-17	1.07698e-15	28.9066
PRADC1	-1040.28	865.617	-9.44663	1.98626e-17	1.1066e-15	28.8788
PGM5P4	-21.5366	3.71111	-9.44612	1.99266e-17	1.10911e-15	28.8757
PEG3	-349.497	89.2056	-9.44477	2.00994e-17	1.11766e-15	28.8671
PIGR	-419809	144693	-9.44435	2.01526e-17	1.11955e-15	28.8645
CTD-2135D7.5	-8.81299	2.43889	-9.44174	2.04902e-17	1.13722e-15	28.8481
RP11-416N2.3	-2.73561	0.538889	-9.44067	2.06296e-17	1.14387e-15	28.8414
CYS1	-411.416	142.067	-9.43854	2.09115e-17	1.15841e-15	28.828
TMOD1	-442.008	106.222	-9.43288	2.16783e-17	1.19975e-15	28.7924
NHSL1	-4151	2823.26	-9.43215	2.17786e-17	1.20415e-15	28.7878
MICALCL	-323.537	184.983	-9.4312	2.19108e-17	1.21032e-15	28.7819
ITIH5	-3030.33	1099.22	-9.43095	2.19462e-17	1.21113e-15	28.7803
BTD	-968.737	741.228	-9.42913	2.22011e-17	1.22404e-15	28.7689
LMOD1	-12078.6	2212.89	-9.42807	2.23512e-17	1.23115e-15	28.7622
SPECC1	-1991.57	1367.8	-9.42687	2.25234e-17	1.23946e-15	28.7546
MYL9	-64663.8	13465.5	-9.42613	2.26299e-17	1.24415e-15	28.75
PLD5	-16.0525	2.72222	-9.42055	2.34468e-17	1.28785e-15	28.7149
PTK2B	-4298.62	2985.3	-9.39992	2.67325e-17	1.46694e-15	28.5853
IGKV1D-39	-156.369	23.0778	-9.39584	2.74346e-17	1.50406e-15	28.5597
CFL2	-2200.47	668.3	-9.39425	2.7712e-17	1.51784e-15	28.5498
ACSF2	-3421.93	1832.28	-9.3928	2.79697e-17	1.53052e-15	28.5406
ABCD3	-4128.27	3416.96	-9.39228	2.80609e-17	1.53407e-15	28.5374
SYNE3	-636.512	345.689	-9.38509	2.93729e-17	1.60358e-15	28.4923
ZFR2	-7.22294	2.68333	-9.38501	2.93873e-17	1.60358e-15	28.4918
FAM163A	-69.2787	21.9556	-9.38055	3.02318e-17	1.64813e-15	28.4638
NLGN1	-98.1359	17.1056	-9.37663	3.09938e-17	1.68809e-15	28.4392
PDZRN4	-619.7	97.1333	-9.37345	3.16258e-17	1.72091e-15	28.4192
CD79A	-1772.91	494.517	-9.36927	3.24772e-17	1.76559e-15	28.393
AP001627.1	-65.2791	11.1278	-9.36878	3.2578e-17	1.76943e-15	28.3899
LGR4	-4943.58	3696.14	-9.36578	3.32045e-17	1.80177e-15	28.3711
IGKV4-1	-13158.7	3605.74	-9.36313	3.3766e-17	1.83055e-15	28.3545
FER1L6	-1312.19	298.961	-9.36109	3.4206e-17	1.85268e-15	28.3418
MPP2	-250.038	91.8667	-9.35396	3.57891e-17	1.93662e-15	28.2971
IGHV3-19	-79.7485	19.0111	-9.34745	3.73e-17	2.01651e-15	28.2562
IGKV1-17	-2580.71	508.217	-9.34711	3.73784e-17	2.01888e-15	28.2541
OCEL1	-998.238	625.472	-9.34641	3.75455e-17	2.02603e-15	28.2497
HAND2-AS1	-1079.8	128.878	-9.34365	3.82077e-17	2.05987e-15	28.2324
RP11-867G23.10	-85.497	16.6778	-9.34189	3.86385e-17	2.08117e-15	28.2214
VDR	-6918.65	5522.26	-9.34067	3.89386e-17	2.0954e-15	28.2137
HECTD3	-4386.04	4008.42	-9.33731	3.97758e-17	2.13848e-15	28.1927
CTC-558O2.1	-41.3888	12.1389	-9.33682	3.98998e-17	2.14317e-15	28.1896
SYNPO2	-28639.2	4707.54	-9.33599	4.01098e-17	2.15247e-15	28.1844
SLC18A3	-24.193	4.93889	-9.32962	4.17637e-17	2.23917e-15	28.1445
KRT27	-5.17043	0.972222	-9.32941	4.18199e-17	2.24013e-15	28.1432
B3GNT6	-2364.06	522.833	-9.3257	4.28148e-17	2.29132e-15	28.12
DCLK1	-462.871	130.328	-9.31976	4.44578e-17	2.37707e-15	28.0828
PYY2	-18.0788	8.15	-9.31826	4.48799e-17	2.39744e-15	28.0734
LIMS2	-3897.29	1115.56	-9.315	4.58183e-17	2.44533e-15	28.053
RP11-489D6.2	-4.05021	0.55	-9.31237	4.65865e-17	2.48406e-15	28.0366
NPY2R	-101.343	10.8222	-9.31119	4.69383e-17	2.50053e-15	28.0291
ARSA	-2704.61	1952.87	-9.30989	4.73247e-17	2.51882e-15	28.021
FLJ41941	-13.0811	2.09444	-9.30769	4.79888e-17	2.55184e-15	28.0073
HTR3C	-36.006	5.59444	-9.30407	4.9102e-17	2.60866e-15	27.9846
TMEM220	-1464.95	228.778	-9.29032	5.35706e-17	2.84348e-15	27.8986
IGHV3-75	-22.0903	4.96667	-9.28896	5.40314e-17	2.86533e-15	27.8901
BVES	-517.546	130.756	-9.28824	5.42778e-17	2.87579e-15	27.8856
DNAJB5	-1065.94	312.272	-9.2881	5.43275e-17	2.87581e-15	27.8847
MRGPRF-AS1	-12.368	3.29444	-9.28655	5.48644e-17	2.901e-15	27.875
IGLV1-50	-113.859	20.6722	-9.28643	5.49027e-17	2.901e-15	27.8743
AC092652.1	-13.1161	2.13889	-9.27915	5.74914e-17	3.03503e-15	27.8288
VPS4B	-3320.2	2984.29	-9.27733	5.81608e-17	3.0676e-15	27.8173
STAB1	-4887.42	2313.26	-9.27585	5.87079e-17	3.09366e-15	27.8081
IGHV3-74	-4774.05	1159.05	-9.27351	5.95826e-17	3.13692e-15	27.7935
SDPR	-2341.42	529.911	-9.27223	6.00648e-17	3.15946e-15	27.7855
IGKV2OR2-1	-19.2847	3.33889	-9.26311	6.36351e-17	3.34425e-15	27.7285
GPRIN2	-855.459	402.017	-9.26034	6.47559e-17	3.40009e-15	27.7112
HAND1	-715.485	103.728	-9.25932	6.51786e-17	3.41921e-15	27.7048
SLC30A4	-912.148	424.883	-9.25673	6.62524e-17	3.47243e-15	27.6887
SPINT1	-14548.5	11831.3	-9.25482	6.70567e-17	3.51142e-15	27.6767
LINC01133	-1454.3	666.267	-9.25259	6.80106e-17	3.55819e-15	27.6628
IGKV1D-35	-7.55136	1.45556	-9.24433	7.1657e-17	3.7456e-15	27.6112
MEP1A	-34024	7888.48	-9.24139	7.30008e-17	3.81243e-15	27.5929
ZSWIM6	-1055.28	956.239	-9.24057	7.33767e-17	3.82864e-15	27.5878
GRIK5	-337.292	74.1444	-9.23727	7.49255e-17	3.90596e-15	27.5671
KIF13B	-6920.15	4774.03	-9.23598	7.55355e-17	3.93425e-15	27.5591
PPP2R2B	-110.269	42.6944	-9.23425	7.63686e-17	3.9741e-15	27.5483
RBKS	-444.01	241.211	-9.22901	7.89365e-17	4.10406e-15	27.5156
PDE8A	-2644.42	2069.49	-9.22778	7.95547e-17	4.13253e-15	27.5079
DES	-88435.4	15807.4	-9.22633	8.02858e-17	4.1668e-15	27.4989
C1orf137	-1.14694	0.166667	-9.22569	8.06081e-17	4.17981e-15	27.4949
C14orf132	-814.822	314.872	-9.22415	8.13976e-17	4.217e-15	27.4853
AC087651.1	-0.538462	0.0388889	-9.2204	8.33481e-17	4.31422e-15	27.4619
MRGPRF	-2224.19	574.061	-9.21984	8.36427e-17	4.32564e-15	27.4584
SOCS2	-687.73	461.478	-9.21653	8.54091e-17	4.41308e-15	27.4378
ARHGEF18	-764.696	588.917	-9.21404	8.67615e-17	4.47899e-15	27.4223
ABHD11-AS1	-639.285	308.578	-9.21108	8.84024e-17	4.55967e-15	27.4038
PIK3CG	-385.713	165.606	-9.20855	8.98258e-17	4.629e-15	27.388
APBA1	-541.289	296.65	-9.20312	9.29575e-17	4.78617e-15	27.3541
SCP2	-7719.78	6699.76	-9.19957	9.50587e-17	4.89004e-15	27.3321
ADAMTSL3	-941.029	206.55	-9.19844	9.57434e-17	4.92093e-15	27.325
NEDD9	-5075.03	3229.35	-9.19607	9.71846e-17	4.9906e-15	27.3102
CCL15-CCL14	-109.595	46.6278	-9.19187	9.97905e-17	5.11992e-15	27.2841
PROB1	-321.888	239.744	-9.18834	1.02038e-16	5.23062e-15	27.2621
GGTA1P	-367.034	133.628	-9.18557	1.03837e-16	5.31817e-15	27.2448
C10orf99	-9921.89	4067.77	-9.18433	1.04651e-16	5.3552e-15	27.2371
FCRL4	-32.7877	7.81111	-9.18	1.07547e-16	5.49854e-15	27.2101
CAPN2	-15535	11925.4	-9.17699	1.09609e-16	5.5991e-15	27.1914
RP11-440I14.2	-15.5997	5.45	-9.17594	1.10337e-16	5.63132e-15	27.1849
CTD-3193O13.1	-7.5638	1.90556	-9.17527	1.10804e-16	5.65022e-15	27.1807
SMPD3	-3997.7	2121.79	-9.17271	1.12607e-16	5.73714e-15	27.1647
LINC01475	-29.2754	6.83889	-9.1707	1.14042e-16	5.80519e-15	27.1522
IGKV1D-33	-50.0396	8.26667	-9.16951	1.14899e-16	5.84375e-15	27.1448
IGLV5-37	-186.037	26.3222	-9.16643	1.17153e-16	5.95317e-15	27.1257
TP73-AS1	-188.94	94.975	-9.16614	1.17373e-16	5.95917e-15	27.1238
GNA13	-3657.81	3514.83	-9.16501	1.18208e-16	5.99636e-15	27.1168
MIR143	-18.5564	3.32222	-9.16486	1.18321e-16	5.9969e-15	27.1158
STPG1	-668.78	526.367	-9.16013	1.21896e-16	6.17273e-15	27.0865
IGHV1OR15-1	-5.0456	1.01111	-9.15632	1.24861e-16	6.31737e-15	27.0627
LANCL3	-243.11	116.294	-9.15265	1.27777e-16	6.45933e-15	27.0399
INSL5	-419.811	50.2778	-9.1522	1.28146e-16	6.47239e-15	27.0371
CROT	-1140.33	753.872	-9.14953	1.30314e-16	6.57619e-15	27.0205
PLXNA2	-4556.3	3265.31	-9.14885	1.30879e-16	6.59411e-15	27.0162
SOCS6	-2040.4	1599.89	-9.14883	1.30895e-16	6.59411e-15	27.0161
MARCKS	-11038.4	9388.48	-9.14808	1.3151e-16	6.6194e-15	27.0115
METRNL	-2362.56	1838.14	-9.14388	1.35037e-16	6.79104e-15	26.9853
SCN7A	-1605.29	186.806	-9.14362	1.35257e-16	6.79624e-15	26.9837
FOLR2	-893.666	295.261	-9.14174	1.36867e-16	6.87123e-15	26.972
CTD-2231E14.4	-1.70336	0.188889	-9.14028	1.3813e-16	6.92369e-15	26.963
FENDRR	-1735.68	602.983	-9.14026	1.38149e-16	6.92369e-15	26.9628
LINC00844	-1.94427	0.35	-9.13304	1.44575e-16	7.23956e-15	26.9179
KCNK10	-245.029	92.2056	-9.13232	1.45228e-16	7.26601e-15	26.9135
DACT3	-849.678	255.611	-9.12779	1.49431e-16	7.46987e-15	26.8853
CD27	-417.677	174.95	-9.12198	1.54995e-16	7.74142e-15	26.8492
PTPRF	-27796.9	22231.1	-9.10893	1.68256e-16	8.39656e-15	26.7681
C18orf32	-284.333	261.433	-9.10829	1.68931e-16	8.42301e-15	26.7642
RASGEF1C	-48.3938	9.71667	-9.10808	1.69157e-16	8.42709e-15	26.7629
TMEM54	-13803.6	9305.63	-9.10721	1.70085e-16	8.4661e-15	26.7575
PTH1R	-66.6997	25.1944	-9.10349	1.74111e-16	8.65914e-15	26.7344
PEX11A	-957.433	672.022	-9.1011	1.76748e-16	8.78281e-15	26.7195
ADRB2	-105.608	41.25	-9.09747	1.80828e-16	8.9779e-15	26.697
RP11-475B2.1	-7.20451	1.23889	-9.09715	1.81195e-16	8.98847e-15	26.695
CD48	-809.779	381.167	-9.0964	1.82049e-16	9.02317e-15	26.6903
CYP2B7P	-261.725	48.1	-9.09226	1.86844e-16	9.25299e-15	26.6647
SGK2	-2567.79	1366.97	-9.08626	1.94027e-16	9.59339e-15	26.6274
BVES-AS1	-20.684	4.19444	-9.08624	1.94046e-16	9.59339e-15	26.6273
GOLM1	-20378.9	13851.6	-9.08031	2.01418e-16	9.94942e-15	26.5905
MYZAP	-334.145	218.372	-9.07137	2.13054e-16	1.05153e-14	26.535
ELL2P1	-9.24367	3.57778	-9.07048	2.14239e-16	1.05648e-14	26.5296
XXyac-YM21GA2.7	-113.257	9.46111	-9.06922	2.15944e-16	1.06399e-14	26.5217
SEMA4G	-4340.28	3007.72	-9.0684	2.17065e-16	1.06862e-14	26.5166
CLDN5	-1295.08	413.611	-9.06661	2.19508e-16	1.07973e-14	26.5056
EPHX2	-5789.23	2533.81	-9.05872	2.30663e-16	1.13365e-14	26.4566
BCL2	-1031.67	496.222	-9.05748	2.3246e-16	1.14152e-14	26.449
NBPF25P	-64.9056	47.1667	-9.05608	2.34517e-16	1.15065e-14	26.4403
TCN2	-3369.27	1156.3	-9.05593	2.34729e-16	1.15072e-14	26.4394
PALM	-1013.54	382.583	-9.0553	2.35657e-16	1.15431e-14	26.4355
KRT20	-78322.2	20814.2	-9.05107	2.41998e-16	1.18437e-14	26.4092
CAPN9	-1264.01	401.817	-9.04594	2.49921e-16	1.22212e-14	26.3774
SELENBP1	-55796	18480.6	-9.04347	2.53828e-16	1.24019e-14	26.3621
UGT2A3	-6046.65	1138.13	-9.0426	2.55205e-16	1.24588e-14	26.3568
IGHV3OR16-16	-10.514	2.32222	-9.03834	2.62114e-16	1.27647e-14	26.3304
RBFOX3	-711.45	90.3944	-9.03834	2.62117e-16	1.27647e-14	26.3304
PPARD	-3506.67	2978.28	-9.03834	2.62127e-16	1.27647e-14	26.3304
GNG12	-8644.22	6674.78	-9.0326	2.71729e-16	1.32212e-14	26.2948
CNTN3	-341.947	94.6722	-9.03241	2.72045e-16	1.32255e-14	26.2937
CCBE1	-592.146	100.467	-9.03121	2.74107e-16	1.33147e-14	26.2862
IGKV3D-7	-34.5444	5.48889	-9.02026	2.93576e-16	1.42485e-14	26.2185
SYNC	-261.261	111.839	-9.01635	3.00875e-16	1.45907e-14	26.1942
RP11-646E18.2	-3.71488	0.861111	-9.01494	3.03542e-16	1.4696e-14	26.1855
MORN5	-166.72	20.7056	-9.01493	3.03549e-16	1.4696e-14	26.1855
C17orf59	-441.998	391.078	-9.01165	3.09861e-16	1.49891e-14	26.1652
ZFYVE28	-977.375	645.367	-9.00604	3.20941e-16	1.55122e-14	26.1305
TRPM4	-8614.74	5741.82	-9.00555	3.21926e-16	1.5547e-14	26.1275
TCEA3	-5127.6	2886.73	-9.0046	3.23845e-16	1.56267e-14	26.1216
HHIP	-656.911	249.994	-9.0021	3.2897e-16	1.58609e-14	26.1061
FCER1A	-132.656	40.1556	-9.00152	3.30165e-16	1.59054e-14	26.1025
VWC2	-40.0488	9.76667	-8.99348	3.47202e-16	1.67123e-14	26.0528
LRMP	-632.667	181.333	-8.99215	3.50116e-16	1.68387e-14	26.0446
RP11-167N24.6	-15.1041	2.29444	-8.98886	3.57385e-16	1.71742e-14	26.0243
RP11-296O14.3	-48.684	28.2167	-8.9862	3.63385e-16	1.74482e-14	26.0079
PPM1A	-2943.98	2852.95	-8.9734	3.93711e-16	1.88887e-14	25.9287
AL117187.1	-3.47121	0.933333	-8.97106	3.99503e-16	1.91509e-14	25.9143
TSHZ1	-2001.73	1479.69	-8.96612	4.12047e-16	1.9736e-14	25.8838
PTX3	-91.0507	33.2944	-8.96154	4.2402e-16	2.02928e-14	25.8555
IGKV3OR22-2	-6.19945	1.09444	-8.95816	4.33077e-16	2.07093e-14	25.8346
URAD	-939.782	262.322	-8.955	4.41697e-16	2.11042e-14	25.8152
TXNIP	-36825.5	21425.1	-8.95392	4.44705e-16	2.12306e-14	25.8085
SNX24	-464.696	294.25	-8.9502	4.55169e-16	2.17124e-14	25.7855
FZD5	-4891.14	4318.42	-8.94716	4.63891e-16	2.21104e-14	25.7668
CAMTA2	-2356.67	2072.22	-8.94692	4.64587e-16	2.21255e-14	25.7653
SVILP1	-71.8673	28.4	-8.94651	4.65781e-16	2.21642e-14	25.7628
RHBDL2	-1051.57	483.533	-8.94146	4.80705e-16	2.28558e-14	25.7316
RP11-521D12.4	-12.2082	1.28889	-8.9409	4.82412e-16	2.29129e-14	25.7281
PTPRZ1	-178.576	34.2444	-8.9408	4.8269e-16	2.29129e-14	25.7276
AC244250.2	-239.216	50.9833	-8.93968	4.861e-16	2.3056e-14	25.7206
ELAVL4	-135.08	27.9833	-8.93612	4.97032e-16	2.35554e-14	25.6987
PSD	-2104.57	422.578	-8.93314	5.06356e-16	2.39778e-14	25.6803
KIAA1045	-34.5702	9.31111	-8.92928	5.18707e-16	2.45374e-14	25.6565
NRSN1	-28.9212	5.24444	-8.92919	5.19014e-16	2.45374e-14	25.6559
PDE5A	-3102.73	1256.12	-8.92791	5.23161e-16	2.47134e-14	25.6481
RP11-160O5.1	-116.298	62.2556	-8.92712	5.25775e-16	2.48168e-14	25.6432
HIGD1AP1	-5.66513	2.20556	-8.92528	5.31837e-16	2.50827e-14	25.6318
ACAA1	-3382.98	2817.73	-8.92472	5.33711e-16	2.51507e-14	25.6284
HADH	-6609.1	5249.3	-8.91543	5.65553e-16	2.66298e-14	25.5712
PDXP	-131.79	75.7278	-8.91354	5.72292e-16	2.69254e-14	25.5595
RP11-182J1.1	-5.08752	1.97222	-8.91223	5.76973e-16	2.71146e-14	25.5514
KIAA0125	-262.883	87.4111	-8.91216	5.77242e-16	2.71146e-14	25.551
CHODL	-159.436	32.6944	-8.90964	5.86389e-16	2.75221e-14	25.5355
KCNMA1	-4587.62	976.167	-8.89874	6.27631e-16	2.94341e-14	25.4684
ACSS2	-9209.89	7754.57	-8.8954	6.4085e-16	3.003e-14	25.4478
RIC3	-104.873	25.7778	-8.89416	6.45821e-16	3.02386e-14	25.4402
MIXL1	-44.403	14.65	-8.88777	6.72084e-16	3.14431e-14	25.4008
PLN	-2760.74	568.033	-8.88324	6.91332e-16	3.23177e-14	25.3729
GIMAP1	-322.046	168.906	-8.87866	7.11339e-16	3.32264e-14	25.3448
PROKR1	-9.75403	2.48889	-8.87512	7.27205e-16	3.39396e-14	25.323
SUCLG2P2	-32.9019	22.1667	-8.875	7.27771e-16	3.39396e-14	25.3222
SLC6A9	-1567.49	907.333	-8.87435	7.30695e-16	3.40488e-14	25.3183
SUSD6	-4587.51	3570.34	-8.87023	7.49713e-16	3.49071e-14	25.2929
ATP6V0D2	-176.012	70.2389	-8.86931	7.54032e-16	3.50802e-14	25.2873
CNKSR2	-61.8526	20.9222	-8.86873	7.56737e-16	3.5178e-14	25.2837
ANKRD35	-114.829	47.7722	-8.86795	7.60431e-16	3.53216e-14	25.2789
KCTD9	-1654.37	1314.96	-8.8635	7.81826e-16	3.62865e-14	25.2515
AQPEP	-59.7927	14.8333	-8.86196	7.89336e-16	3.65931e-14	25.2421
IGHV3OR16-8	-80.7324	17.9444	-8.86189	7.89684e-16	3.65931e-14	25.2417
PTPRR	-1426.43	531.278	-8.85782	8.09969e-16	3.75033e-14	25.2166
RNF150	-1434.75	263.95	-8.85144	8.42776e-16	3.89914e-14	25.1774
IGHJ3P	-61.3994	17.1889	-8.84765	8.62906e-16	3.98911e-14	25.1541
CNGA1	-422.18	167.772	-8.84582	8.7278e-16	4.03157e-14	25.1429
RP11-1000B6.3	-13.0318	5.75556	-8.84431	8.81002e-16	4.06633e-14	25.1337
SDHA	-8319.68	7907.11	-8.84382	8.83688e-16	4.07551e-14	25.1306
PNCK	-685.685	129.606	-8.83882	9.11605e-16	4.19794e-14	25.1
PGM5-AS1	-60.7522	7.82778	-8.83881	9.11674e-16	4.19794e-14	25.0999
FAM110D	-89.4399	46.7889	-8.83451	9.36401e-16	4.3084e-14	25.0735
SHE	-385.304	183.6	-8.82499	9.9352e-16	4.56761e-14	25.015
KIF1C	-10904.7	9489.71	-8.82411	9.98949e-16	4.58896e-14	25.0096
ANKS1B	-87.6053	17.1833	-8.82345	1.00308e-15	4.60431e-14	25.0056
MAB21L2	-3353.66	690.778	-8.81518	1.05601e-15	4.84348e-14	24.9548
MIER1	-2700.75	2226.99	-8.81249	1.07384e-15	4.92138e-14	24.9383
RAVER2	-2749.58	2253.39	-8.80875	1.09907e-15	5.03307e-14	24.9154
RP11-756A22.7	-29.9834	9.56667	-8.80856	1.10038e-15	5.03512e-14	24.9142
FCER2	-128.69	28.5278	-8.80718	1.10985e-15	5.07444e-14	24.9058
IGKV3-7	-283.958	71.55	-8.80567	1.12026e-15	5.11807e-14	24.8965
ARPP21	-17.4712	2.94444	-8.80351	1.13541e-15	5.1832e-14	24.8833
RNF125	-879.79	479.289	-8.80144	1.1501e-15	5.24617e-14	24.8706
JPH2	-1843.48	399.733	-8.79521	1.19548e-15	5.44892e-14	24.8324
CYSLTR1	-164.579	77.9222	-8.79276	1.21385e-15	5.52834e-14	24.8174
RP11-498E2.9	-9.9134	3.03333	-8.79125	1.22526e-15	5.57593e-14	24.8081
SVIL	-10761.8	4613.03	-8.78522	1.27203e-15	5.78426e-14	24.7712
GINM1	-1498.8	1529.83	-8.78465	1.27656e-15	5.80033e-14	24.7676
GLDN	-463.502	122.589	-8.78004	1.31362e-15	5.9641e-14	24.7394
MAST3	-1490.2	1263.58	-8.77413	1.36268e-15	6.18205e-14	24.7032
SMYD1	-419.842	50.1722	-8.77378	1.36564e-15	6.19065e-14	24.7011
RP11-320N21.1	-64.0977	15.3778	-8.77335	1.36923e-15	6.20212e-14	24.6985
SOWAHB	-980.644	703.411	-8.77048	1.39383e-15	6.30863e-14	24.6809
C20orf166-AS1	-134.192	24.5	-8.76948	1.40253e-15	6.34311e-14	24.6748
MAGOH2P	-15.3436	7.07222	-8.75674	1.51783e-15	6.85926e-14	24.5968
CHL1-AS2	-8.1474	2.13333	-8.75058	1.57696e-15	7.12096e-14	24.5591
KLC4	-3964.93	3182.96	-8.749	1.59251e-15	7.18563e-14	24.5494
ATP5A1	-25255.4	20982.3	-8.74412	1.64136e-15	7.40031e-14	24.5196
CACFD1	-2865.66	2276.3	-8.74371	1.64557e-15	7.41356e-14	24.5171
RP11-308N19.1	-6.95808	1.54444	-8.7407	1.67654e-15	7.5473e-14	24.4987
MVP	-23939.5	21236.5	-8.74019	1.68185e-15	7.56534e-14	24.4956
BSG	-46822.8	39937.3	-8.73521	1.73457e-15	7.79646e-14	24.4651
NPR1	-547.454	222.161	-8.73274	1.76123e-15	7.91022e-14	24.4501
BTBD3	-2396.01	1924.03	-8.72768	1.81739e-15	8.15618e-14	24.4191
EPM2A	-389.11	200.839	-8.72702	1.82481e-15	8.1832e-14	24.4151
TRAK2	-2654.82	2583.22	-8.72646	1.83116e-15	8.20535e-14	24.4116
MAP6	-259.009	86.4667	-8.71316	1.9883e-15	8.90267e-14	24.3304
GRIA3	-49.9756	15.1722	-8.71275	1.99332e-15	8.91833e-14	24.3279
MARC2	-981.262	555.222	-8.70975	2.03067e-15	9.07847e-14	24.3096
FBXO32	-6951.53	2416.44	-8.70769	2.05676e-15	9.18806e-14	24.297
KCNMB1	-2034.56	447.306	-8.70328	2.11359e-15	9.42794e-14	24.2701
RP11-307B6.3	-15.6582	3.01111	-8.70327	2.11369e-15	9.42794e-14	24.2701
CPED1	-1657.68	524.039	-8.7022	2.12775e-15	9.48344e-14	24.2635
IGHV3-53	-1430.3	279.694	-8.69887	2.17207e-15	9.67357e-14	24.2432
GPM6A	-799.912	108.167	-8.69804	2.18322e-15	9.71584e-14	24.2381
TMEM131	-4570.4	4279.07	-8.69749	2.19066e-15	9.74153e-14	24.2348
GPR162	-120.644	69.3	-8.6945	2.23162e-15	9.9161e-14	24.2165
MEF2D	-3840.21	3138.99	-8.69265	2.2572e-15	1.00221e-13	24.2052
ADCY2	-206.271	71.4722	-8.69104	2.27977e-15	1.01147e-13	24.1954
ALAS2	-28.234	8.26667	-8.69091	2.28166e-15	1.01154e-13	24.1946
ATP2B1	-3480.08	3018.42	-8.68835	2.31803e-15	1.02688e-13	24.179
CTD-3157E16.1	-98.4528	47.35	-8.68821	2.32009e-15	1.02702e-13	24.1781
MEF2C-AS1	-30.6283	9.12222	-8.68739	2.33186e-15	1.03144e-13	24.1731
IGKV1D-8	-211.102	59.1444	-8.68452	2.37363e-15	1.04912e-13	24.1556
IL10RB	-2729.03	2407.3	-8.68195	2.41154e-15	1.06507e-13	24.14
CDH23	-165.924	90.3667	-8.67689	2.48811e-15	1.09806e-13	24.1092
SHISA3	-314.841	79.6667	-8.66061	2.75141e-15	1.21334e-13	24.0099
AC245028.1	-7.41548	1.42778	-8.65978	2.76562e-15	1.21869e-13	24.0048
CDC42SE2	-4536.86	5065.8	-8.65498	2.84874e-15	1.25437e-13	23.9756
TPM1	-30397.9	17704.4	-8.65426	2.86145e-15	1.25902e-13	23.9712
KBTBD13	-1.72455	0.4	-8.65242	2.89407e-15	1.27241e-13	23.96
ARHGEF26	-691.459	304.172	-8.65203	2.90111e-15	1.27454e-13	23.9576
EML1	-1534.33	491.178	-8.64897	2.95634e-15	1.29783e-13	23.939
TCEAL7	-165.882	67.4833	-8.64562	3.01811e-15	1.32395e-13	23.9186
FBXL22	-293.947	101.744	-8.64457	3.03779e-15	1.33159e-13	23.9122
TAS1R1	-15.234	4.32778	-8.64325	3.0625e-15	1.34141e-13	23.9042
TMEM56	-2386.56	1411.73	-8.64306	3.06626e-15	1.34205e-13	23.903
CKMT1A	-1044.38	693.278	-8.63908	3.14234e-15	1.37432e-13	23.8788
LIFR-AS1	-20.2621	6.81667	-8.63273	3.26797e-15	1.4282e-13	23.8402
RGS2	-2741.89	998.133	-8.63197	3.28335e-15	1.43385e-13	23.8355
ATP2B2	-19.2971	5.78889	-8.62909	3.34202e-15	1.45838e-13	23.8181
TMEM130	-134.221	41.55	-8.62122	3.50818e-15	1.52974e-13	23.7702
C16orf62	-1963.11	1246.44	-8.61754	3.58861e-15	1.56364e-13	23.7478
MAPK10	-235.429	93.2667	-8.61199	3.71358e-15	1.61689e-13	23.7141
RAB37	-439.627	221.278	-8.60914	3.77933e-15	1.64429e-13	23.6968
KANK2	-6760.5	3197.38	-8.60802	3.8055e-15	1.65444e-13	23.69
ASPG	-580.174	113.728	-8.59917	4.01875e-15	1.74586e-13	23.6362
SNAP91	-66.4339	14.1333	-8.59689	4.0755e-15	1.76919e-13	23.6223
TDRD10	-29.181	14.3111	-8.59546	4.11155e-15	1.78352e-13	23.6137
NPAS4	-31.2146	6.11667	-8.59129	4.21836e-15	1.82849e-13	23.5884
MYO1D	-29114.1	21646.9	-8.58198	4.46712e-15	1.93488e-13	23.5318
CTD-2022H16.2	-2.76048	0.438889	-8.58166	4.47596e-15	1.93727e-13	23.5299
RP11-345K9.2	-2.87655	0.638889	-8.5781	4.57526e-15	1.97878e-13	23.5083
IGKV3D-15	-268.693	66.3278	-8.57558	4.64659e-15	2.00814e-13	23.493
FRMD1	-1292.82	587.628	-8.57478	4.66947e-15	2.01654e-13	23.4882
SLC9A3R1	-9722.59	6042.98	-8.5712	4.77339e-15	2.05951e-13	23.4664
CD101	-210.532	112.289	-8.57111	4.77601e-15	2.05951e-13	23.4659
RP11-703I16.1	-79.5094	50.6944	-8.56128	5.07384e-15	2.18632e-13	23.4062
CCNJL	-1177.99	484.394	-8.56084	5.08752e-15	2.19043e-13	23.4036
MAN1A1	-4980.37	3251.17	-8.56073	5.09089e-15	2.19043e-13	23.4029
SLITRK2	-31.9199	7.07778	-8.55647	5.22602e-15	2.24692e-13	23.3771
ZIK1	-80.7904	43.0444	-8.54807	5.50261e-15	2.3641e-13	23.3262
RP11-285E9.6	-14.9784	6.41111	-8.54757	5.51979e-15	2.36973e-13	23.3231
ACAT1	-4164.7	2976.77	-8.54438	5.62893e-15	2.41482e-13	23.3038
APOBEC3B	-989.23	464.522	-8.5439	5.64563e-15	2.4202e-13	23.3009
FOXD3-AS1	-22.2183	5.15556	-8.53669	5.90101e-15	2.52622e-13	23.2573
HPCA	-57.1824	34.7167	-8.53668	5.90159e-15	2.52622e-13	23.2572
SIGLEC11	-36.7582	14.5889	-8.53623	5.91787e-15	2.53133e-13	23.2545
KBTBD11	-2552.18	1640.99	-8.53476	5.97159e-15	2.55244e-13	23.2456
RP11-334E6.3	-2.89452	0.622222	-8.53459	5.97787e-15	2.55325e-13	23.2445
WISP2	-444.582	96.9111	-8.52619	6.29413e-15	2.68637e-13	23.1937
B3GALT5-AS1	-487.573	63.7944	-8.52134	6.48406e-15	2.76541e-13	23.1644
IGHV3-23	-8774.93	2598.82	-8.51908	6.5748e-15	2.80207e-13	23.1506
TACR2	-2113.34	362.517	-8.51658	6.67645e-15	2.84331e-13	23.1355
FAM189A1	-729.386	252.522	-8.51493	6.74413e-15	2.87004e-13	23.1256
ANKRD53	-31.1152	14.5167	-8.51409	6.77897e-15	2.88277e-13	23.1205
STX12	-2153.11	2251.08	-8.51156	6.885e-15	2.92463e-13	23.1052
FAS	-1146.14	750.1	-8.5115	6.88744e-15	2.92463e-13	23.1048
FCRLA	-186.411	48.7444	-8.51125	6.89816e-15	2.92706e-13	23.1033
HIPK4	-14.4602	4.66111	-8.51047	6.93103e-15	2.93887e-13	23.0986
CLIP3	-1431.78	566.55	-8.50456	7.18709e-15	3.04523e-13	23.0628
WASL	-4710.68	4525.92	-8.48926	7.89376e-15	3.34223e-13	22.9703
RNF11	-2443.9	2472.14	-8.48807	7.95128e-15	3.36414e-13	22.9632
FOSL2	-9560.76	7486.43	-8.48571	8.06725e-15	3.41074e-13	22.9489
CTD-2308L22.1	-16.4569	6.57778	-8.4852	8.09217e-15	3.4188e-13	22.9459
KB-1410C5.3	-3.43482	0.505556	-8.48035	8.3365e-15	3.51947e-13	22.9165
LINC00461	-17.5421	3.95556	-8.4766	8.52979e-15	3.59848e-13	22.8939
AOC3	-5581.56	1622.71	-8.47642	8.53958e-15	3.6e-13	22.8928
TAX1BP3	-1691.31	1537.84	-8.47497	8.61539e-15	3.62934e-13	22.8841
SERINC2	-15648.3	11770.2	-8.46574	9.1161e-15	3.8375e-13	22.8284
RP11-635N19.1	-29.3155	19.9556	-8.46137	9.36358e-15	3.93884e-13	22.802
IMPA2	-3380.53	2429.46	-8.45838	9.53591e-15	4.00845e-13	22.784
AF001548.6	-57.8508	8.78889	-8.45231	9.89664e-15	4.15709e-13	22.7474
CALM1	-20645.9	21305.8	-8.44728	1.02061e-14	4.28401e-13	22.717
HSPB8	-4090.85	758.45	-8.44436	1.03897e-14	4.35793e-13	22.6994
HBA2	-1019.03	227.567	-8.44398	1.04143e-14	4.3651e-13	22.6971
IGHV4-34	-1740.5	564.356	-8.44338	1.04524e-14	4.37795e-13	22.6935
P2RY2	-503.034	345.989	-8.4432	1.04637e-14	4.37953e-13	22.6924
COX7A1	-314.327	175.606	-8.43897	1.07379e-14	4.49106e-13	22.6669
FAM214A	-1050.37	858.333	-8.42984	1.13543e-14	4.74547e-13	22.6119
GPR88	-22.1819	6.72778	-8.42963	1.13688e-14	4.74813e-13	22.6106
TPM2	-27701.5	8592.53	-8.42885	1.14229e-14	4.76732e-13	22.606
LRP10	-16899.8	14396.8	-8.42493	1.17e-14	4.87947e-13	22.5823
TNS1	-24008.2	6623.96	-8.42351	1.18019e-14	4.91846e-13	22.5738
RP11-501J20.5	-3.28835	0.872222	-8.42332	1.1815e-14	4.92043e-13	22.5727
MT1H	-2969.4	321.517	-8.42081	1.1998e-14	4.99306e-13	22.5575
IGHV4OR15-8	-13.1129	2.91111	-8.41916	1.21195e-14	5.04002e-13	22.5476
LPCAT3	-1581.56	1133.59	-8.41819	1.21913e-14	5.06627e-13	22.5418
GZMM	-121.255	45.1944	-8.41726	1.22608e-14	5.09155e-13	22.5362
INPP5A	-1400.36	1460.54	-8.41469	1.24544e-14	5.16826e-13	22.5207
HBM	-1.86135	0.35	-8.41315	1.2572e-14	5.21337e-13	22.5115
HTR3A	-54.327	16.2889	-8.41248	1.2624e-14	5.2312e-13	22.5074
POPDC2	-1054.3	202.994	-8.41155	1.26955e-14	5.25713e-13	22.5018
TMTC1	-800.573	358.861	-8.40634	1.31057e-14	5.42314e-13	22.4705
PNOC	-71.7803	26.25	-8.40182	1.3472e-14	5.57073e-13	22.4433
TMEM45B	-9451.09	7335.11	-8.40078	1.35578e-14	5.60224e-13	22.437
RP11-350G8.5	-9.84938	3.93889	-8.39761	1.38225e-14	5.70758e-13	22.418
POLD4	-1570.73	1303.63	-8.39502	1.40429e-14	5.79449e-13	22.4024
RP11-583F24.7	-2.04606	0.255556	-8.39137	1.43592e-14	5.92084e-13	22.3804
XDH	-4933.82	1542.36	-8.39028	1.44546e-14	5.95597e-13	22.3739
RP11-1036E20.9	-9.75679	2.25556	-8.39015	1.44661e-14	5.95649e-13	22.3731
BCL2L11	-1405.58	1261.7	-8.38742	1.47095e-14	6.05245e-13	22.3566
PDK2	-1941.44	1475.93	-8.38268	1.51403e-14	6.22532e-13	22.3282
KCNB2	-11.9079	3.64444	-8.38123	1.52744e-14	6.27606e-13	22.3195
ZNF667-AS1	-173.785	80.2278	-8.37205	1.61531e-14	6.63243e-13	22.2644
CDC42EP5	-3602.63	2201.33	-8.37006	1.63501e-14	6.70858e-13	22.2524
HTR7	-54.9387	14.6444	-8.36857	1.65e-14	6.76535e-13	22.2434
KRT1	-68.7503	15.0611	-8.36663	1.66962e-14	6.84099e-13	22.2318
ABCA9	-277.971	76.5667	-8.35843	1.75507e-14	7.18607e-13	22.1825
CTC-296K1.4	-36.058	7.7	-8.35761	1.76387e-14	7.21703e-13	22.1776
MBOAT1	-894.644	648.2	-8.35353	1.80822e-14	7.39334e-13	22.1531
OGN	-1638.35	320.822	-8.35021	1.84515e-14	7.53903e-13	22.1332
PPP1R12B	-15448.8	4332.77	-8.34751	1.87566e-14	7.65831e-13	22.117
GPR108	-2486.76	2765.14	-8.34612	1.89165e-14	7.71426e-13	22.1087
RP11-285G1.9	-13.2971	3.35556	-8.34609	1.892e-14	7.71426e-13	22.1085
CHRM4	-46.3901	11.8833	-8.34433	1.9123e-14	7.79157e-13	22.098
SLC25A42	-424.943	351.517	-8.33696	2.00002e-14	8.14332e-13	22.0538
PCDH11Y	-6.78766	0.933333	-8.33666	2.0037e-14	8.15261e-13	22.052
MYOCD	-1750.36	376.828	-8.33641	2.00668e-14	8.15907e-13	22.0505
MOB3A	-1722.27	1767.65	-8.33539	2.01919e-14	8.20419e-13	22.0444
IGHV3OR16-12	-23.5159	5.10556	-8.33523	2.02119e-14	8.20661e-13	22.0434
CAB39	-4756.92	5401.48	-8.33469	2.02783e-14	8.22788e-13	22.0402
PQLC1	-2727.69	2062.31	-8.33297	2.04906e-14	8.30824e-13	22.0299
IGKV1-16	-2096.59	545.211	-8.33144	2.06833e-14	8.38054e-13	22.0207
VAMP2	-2451.47	1704.89	-8.33087	2.07544e-14	8.40353e-13	22.0173
RP11-490M8.1	-39.2575	27.5778	-8.33072	2.07736e-14	8.40547e-13	22.0164
CD160	-93.6743	29.7833	-8.32845	2.10622e-14	8.51632e-13	22.0028
SLC17A1	-20.491	6.98889	-8.32661	2.12993e-14	8.60624e-13	21.9917
HIF3A	-297.706	110.333	-8.32342	2.17163e-14	8.76868e-13	21.9726
RP11-1263C18.1	-1.50161	0.222222	-8.32194	2.1912e-14	8.84158e-13	21.9638
PRRG3	-59.2962	20.7556	-8.31875	2.23408e-14	9.00838e-13	21.9447
MSRA	-848.74	593.789	-8.31692	2.25912e-14	9.10305e-13	21.9337
RP11-554A11.4	-107.297	27.6833	-8.31394	2.30041e-14	9.26304e-13	21.9158
XXyac-YM21GA2.3	-3.52556	0.344444	-8.31268	2.31808e-14	9.32776e-13	21.9083
LIPH	-4657.96	2922.68	-8.3072	2.39651e-14	9.63672e-13	21.8755
FAM162A	-3721.67	3395.81	-8.30651	2.40656e-14	9.67044e-13	21.8714
ERICH3	-13.8033	3.11667	-8.30363	2.44896e-14	9.83407e-13	21.8542
MPP5	-1831.49	1705.71	-8.30346	2.45147e-14	9.83739e-13	21.8531
LGALS3	-52887.4	38998.5	-8.30193	2.47437e-14	9.92244e-13	21.844
CASQ1	-47.3459	12.6889	-8.30067	2.49346e-14	9.99214e-13	21.8364
IGHV1OR16-1	-20.0811	4.6	-8.29954	2.51065e-14	1.00541e-12	21.8296
SUN2	-6322.39	5957.38	-8.29798	2.53448e-14	1.01426e-12	21.8203
RAB6B	-422.756	206.622	-8.29657	2.55621e-14	1.02226e-12	21.8119
RASGRP2	-302.288	160.006	-8.29182	2.63107e-14	1.05147e-12	21.7835
RCSD1	-681.247	405.339	-8.2916	2.63445e-14	1.0521e-12	21.7822
ADRA1A	-21.111	5.64444	-8.28947	2.66876e-14	1.06508e-12	21.7694
LINC01055	-16.8908	4.94444	-8.28686	2.71145e-14	1.08137e-12	21.7538
AF131217.1	-42.7176	12.4444	-8.28614	2.72319e-14	1.08532e-12	21.7495
RP11-441F2.5	-27.327	4.33889	-8.28372	2.76353e-14	1.10064e-12	21.7351
WARSP1	-2.40396	0.538889	-8.28336	2.76953e-14	1.10228e-12	21.7329
KLK15	-137.602	54.0278	-8.27579	2.89961e-14	1.15327e-12	21.6877
CAMK4	-224.645	115.733	-8.26999	3.00347e-14	1.19376e-12	21.653
MYT1L	-19.2626	3.20556	-8.26819	3.03647e-14	1.20606e-12	21.6422
IGKV1-35	-2.5357	0.416667	-8.26742	3.0506e-14	1.21085e-12	21.6377
ZC3H12C	-961.61	568.917	-8.26437	3.10748e-14	1.23258e-12	21.6194
LINC00582	-14.3284	4.78333	-8.26302	3.13297e-14	1.24185e-12	21.6114
FAM46A	-2302.81	1396.27	-8.26075	3.17643e-14	1.25823e-12	21.5978
VLDLR-AS1	-43.3584	14.85	-8.25536	3.2818e-14	1.29908e-12	21.5657
GAS7	-1956.13	1013.76	-8.25125	3.36451e-14	1.33092e-12	21.5411
IGHV3-22	-17.7011	5.03889	-8.24597	3.47379e-14	1.37322e-12	21.5096
OR2L13	-2.84247	0.516667	-8.24491	3.49626e-14	1.38117e-12	21.5033
PACSIN1	-53.977	26.8444	-8.24139	3.57151e-14	1.40994e-12	21.4823
ICAM3	-169.365	79.8667	-8.23971	3.60803e-14	1.42339e-12	21.4723
IGLV2-28	-44.082	11.2556	-8.23728	3.66142e-14	1.44301e-12	21.4578
RP11-1069G10.1	-173.691	51.1611	-8.23722	3.66271e-14	1.44301e-12	21.4574
TSPAN11	-1131.45	486.956	-8.23569	3.69682e-14	1.45547e-12	21.4483
OLFM3	-37.4261	7.2	-8.23299	3.75778e-14	1.47847e-12	21.4322
RP3-400B16.1	-16.3054	6.87222	-8.22893	3.85123e-14	1.51422e-12	21.408
RP11-566K19.11	-3.93275	0.966667	-8.22755	3.88348e-14	1.52587e-12	21.3998
WNT9A	-289.059	118.356	-8.22507	3.94209e-14	1.54786e-12	21.385
DENND1C	-1814.94	1647.6	-8.22363	3.97668e-14	1.56039e-12	21.3764
IGLV3-9	-1319.42	256.95	-8.22328	3.98516e-14	1.56267e-12	21.3743
GCOM1	-100.374	54.1056	-8.22213	4.01297e-14	1.57252e-12	21.3674
IGHV3-48	-1119.98	276.061	-8.21808	4.11232e-14	1.61037e-12	21.3433
PPP1R1A	-368.015	71.3333	-8.21636	4.15528e-14	1.6261e-12	21.3331
TRHDE	-384.75	122.883	-8.21525	4.18337e-14	1.636e-12	21.3265
RP11-875O11.1	-29.1023	16.4611	-8.21275	4.24703e-14	1.65978e-12	21.3116
KBTBD11-OT1	-59.3561	28.7	-8.21247	4.25405e-14	1.66141e-12	21.31
AARD	-26.1469	8.97222	-8.2121	4.26364e-14	1.66405e-12	21.3077
AC105398.3	-1.51958	0.205556	-8.21141	4.2816e-14	1.66994e-12	21.3036
C2CD2L	-1234.95	1161.71	-8.20556	4.43559e-14	1.72885e-12	21.2688
GPM6B	-735.491	222.089	-8.20354	4.49003e-14	1.74889e-12	21.2568
EPHA5	-23.8678	5.39444	-8.20307	4.50268e-14	1.75265e-12	21.254
ACOT11	-1785.35	1466.13	-8.20096	4.56061e-14	1.77402e-12	21.2414
P2RY8	-209.249	107.094	-8.19499	4.72786e-14	1.83785e-12	21.2059
ATP2B4	-10390.4	3763.86	-8.19464	4.73808e-14	1.8406e-12	21.2038
IGHV3-52	-75.6504	17.5056	-8.19202	4.8136e-14	1.86869e-12	21.1882
TCEAL2	-248.308	44.3944	-8.18202	5.11297e-14	1.9836e-12	21.1287
LCN10	-16.7609	3.91111	-8.18028	5.16709e-14	2.00326e-12	21.1184
TMEM140	-888.791	756.322	-8.17959	5.18857e-14	2.00845e-12	21.1143
IL17B	-16.3556	9.13333	-8.17955	5.18976e-14	2.00845e-12	21.1141
NTRK3	-130.753	37.3056	-8.17952	5.1908e-14	2.00845e-12	21.1139
FRMPD4	-78.0553	9.96667	-8.17547	5.31904e-14	2.05671e-12	21.0898
INPP5K	-1260.02	1312.52	-8.17529	5.32479e-14	2.05757e-12	21.0888
FRMD4B	-1051.73	836.539	-8.17491	5.33723e-14	2.06101e-12	21.0865
KB-1448A5.1	-5.00553	1.89444	-8.17172	5.44091e-14	2.09966e-12	21.0675
MEGF10	-51.088	17.7556	-8.17094	5.46636e-14	2.10809e-12	21.0629
RP11-390E23.6	-343.253	267.383	-8.16984	5.50295e-14	2.1208e-12	21.0563
PIP5K1B	-2849.58	2483.99	-8.16878	5.53822e-14	2.13298e-12	21.05
RP3-525N10.2	-10.0267	2.46667	-8.16589	5.6354e-14	2.16898e-12	21.0329
AADACL2	-19.8448	3.05	-8.16334	5.72277e-14	2.20116e-12	21.0177
MISP	-26554.6	20063.7	-8.16282	5.74073e-14	2.20661e-12	21.0146
FOXF1	-1732.77	818.372	-8.15945	5.85855e-14	2.25041e-12	20.9946
CRY2	-1368.62	1342.14	-8.15585	5.98703e-14	2.29825e-12	20.9733
POLRMTP1	-176.461	85.8222	-8.1545	6.03585e-14	2.31547e-12	20.9653
CCL8	-289.251	96.7167	-8.15346	6.07368e-14	2.32846e-12	20.9591
CAP2	-831.48	293.956	-8.1517	6.13874e-14	2.35185e-12	20.9486
VWA5A	-3787.47	2104.53	-8.14542	6.37529e-14	2.43936e-12	20.9114
LINC00087	-44.3671	26.6833	-8.14541	6.3755e-14	2.43936e-12	20.9113
POU3F4	-17.1299	2.26111	-8.14259	6.48466e-14	2.4795e-12	20.8946
HERPUD1	-4753.29	5069.7	-8.13833	6.65315e-14	2.54226e-12	20.8693
CLVS2	-35.7494	6.75556	-8.13813	6.66148e-14	2.54378e-12	20.8681
ROGDI	-912.486	950.339	-8.12804	7.07832e-14	2.70119e-12	20.8083
RP11-725G5.2	-15.1893	5.6	-8.12782	7.08754e-14	2.70294e-12	20.807
LYNX1	-761.253	190.572	-8.1267	7.13553e-14	2.71947e-12	20.8004
TPRG1L	-4560.49	4362.57	-8.12182	7.34838e-14	2.79876e-12	20.7714
PDE4D	-1537.81	850.022	-8.11741	7.54584e-14	2.87209e-12	20.7453
OR2W3	-34.6619	10.0722	-8.11023	7.87856e-14	2.99678e-12	20.7028
IL2	-4.38554	1.23889	-8.10998	7.89065e-14	2.99806e-12	20.7013
NCOA1	-1911.53	2124.44	-8.10994	7.89219e-14	2.99806e-12	20.7011
KIAA1683	-421.174	140.244	-8.10851	7.96039e-14	3.022e-12	20.6926
PPP1R3C	-493.72	142.783	-8.10549	8.10614e-14	3.07533e-12	20.6747
CTD-2562J17.6	-822.717	515.317	-8.10387	8.18581e-14	3.10253e-12	20.6651
BCL10	-2142.35	1916.37	-8.10381	8.18846e-14	3.10253e-12	20.6648
TMIGD2	-63.7006	28.9	-8.10131	8.3125e-14	3.14748e-12	20.65
IGHV4-59	-4410.84	1180.57	-8.09555	8.60523e-14	3.25621e-12	20.6159
GSTM2	-360.821	204.7	-8.09288	8.74416e-14	3.30664e-12	20.6001
SGCE	-653.013	312.533	-8.09236	8.77161e-14	3.31487e-12	20.597
MYO1C	-12119.5	11111.3	-8.09021	8.88566e-14	3.3558e-12	20.5843
CTD-2207O23.3	-8.66467	1.96111	-8.08934	8.93228e-14	3.37123e-12	20.5791
ANTXR2	-4471.38	3421.17	-8.088	9.00431e-14	3.39622e-12	20.5712
IGKV1D-16	-360.166	85.4611	-8.08224	9.3212e-14	3.51347e-12	20.5372
AC073900.4	-3.73607	1.07222	-8.07975	9.46149e-14	3.56326e-12	20.5224
AC246787.4	-19.3464	6.12778	-8.07968	9.46549e-14	3.56326e-12	20.522
FLNA	-128802	44433.2	-8.07855	9.52977e-14	3.58514e-12	20.5154
ITGB7	-514.733	244.211	-8.07702	9.61791e-14	3.61597e-12	20.5063
RGAG4	-226.285	125.75	-8.07679	9.63098e-14	3.61856e-12	20.505
C15orf59	-105.043	48.9278	-8.06877	1.01055e-13	3.79441e-12	20.4576
RP11-803B1.2	-4.30032	0.933333	-8.05948	1.06845e-13	4.00924e-12	20.4027
CTC-436P18.3	-42.2529	13.1833	-8.05865	1.07381e-13	4.02676e-12	20.3978
RP11-731D1.4	-16.3924	9.02222	-8.05835	1.07573e-13	4.03136e-12	20.396
SEMA3G	-1010.88	362.517	-8.05618	1.08984e-13	4.08164e-12	20.3832
SIGLEC8	-107.153	41.2778	-8.05509	1.09694e-13	4.10559e-12	20.3768
CCR12P	-1.82543	0.383333	-8.05431	1.10207e-13	4.12216e-12	20.3722
LMO3	-1159.41	229.244	-8.04698	1.15161e-13	4.30199e-12	20.3289
FBXW5	-5883.83	6090.96	-8.04697	1.15163e-13	4.30199e-12	20.3289
HEPACAM	-10.5053	2.56111	-8.04463	1.1679e-13	4.35997e-12	20.3151
KIAA1522	-10614.7	9741.89	-8.04418	1.17103e-13	4.36886e-12	20.3124
RP11-64B16.2	-52.2054	17.4111	-8.04402	1.17219e-13	4.37041e-12	20.3114
CA14	-95.9415	35.3722	-8.03885	1.20902e-13	4.50487e-12	20.281
RND2	-89.4017	31.5167	-8.03868	1.21027e-13	4.50663e-12	20.28
KLF13	-6371.13	5799.93	-8.03857	1.21106e-13	4.5067e-12	20.2793
IGLV2-33	-35.5532	7.32222	-8.03817	1.21397e-13	4.51466e-12	20.277
PER1	-3176.97	1266.87	-8.03692	1.22307e-13	4.5456e-12	20.2696
LONRF2	-456.33	77.0889	-8.03282	1.2535e-13	4.65572e-12	20.2454
MSRB3	-3607.67	1220.03	-8.03162	1.26254e-13	4.68634e-12	20.2383
ITGA7	-2056.96	837.756	-8.0293	1.28021e-13	4.7489e-12	20.2246
CAPN13	-1311.08	568.144	-8.02776	1.29205e-13	4.78978e-12	20.2156
SPHKAP	-16.8392	2.3	-8.02548	1.30979e-13	4.85246e-12	20.2021
RNU6-1065P	-5.00461	1.97222	-8.02254	1.33299e-13	4.93527e-12	20.1848
IGHV3-49	-2902.49	678.978	-8.02237	1.33439e-13	4.93734e-12	20.1838
TSPAN3	-19393.6	17709.2	-8.02165	1.34013e-13	4.95544e-12	20.1796
NPTX1	-1797.68	181.072	-8.0177	1.3722e-13	5.07079e-12	20.1563
ABCB1	-7320.16	2563.98	-8.01403	1.40263e-13	5.17995e-12	20.1347
PSEN1	-4314.5	4703.41	-8.01299	1.41139e-13	5.20901e-12	20.1286
NXPE1	-3016.26	1052.04	-8.01162	1.42298e-13	5.2485e-12	20.1205
LINC01016	-9.35836	3.39444	-8.00823	1.4521e-13	5.3525e-12	20.1006
RP11-598D12.1	-3.50299	0.75	-8.00466	1.48345e-13	5.46462e-12	20.0795
RP11-230B22.1	-17.2275	8.01667	-8.00453	1.48457e-13	5.46529e-12	20.0788
AJ011932.1	-4.69369	1.72222	-7.99882	1.53612e-13	5.6515e-12	20.0452
C1orf226	-1193.37	1082.59	-7.99674	1.55536e-13	5.7187e-12	20.0329
ARHGAP17	-2356.2	3076.97	-7.99362	1.58456e-13	5.82239e-12	20.0146
SH3BGR	-266.746	121.211	-7.99213	1.59874e-13	5.8708e-12	20.0058
NMRK2	-4.16352	0.983333	-7.98983	1.62092e-13	5.94849e-12	19.9923
ZNF229	-70.8314	27.3611	-7.98938	1.62526e-13	5.96067e-12	19.9896
LETM1	-4564.41	4107.86	-7.98902	1.62874e-13	5.96971e-12	19.9875
IGKV1-27	-1701.81	430.25	-7.98774	1.64125e-13	6.01176e-12	19.98
RHAG	-7.93459	1.1	-7.98597	1.65871e-13	6.07192e-12	19.9696
LINC01158	-3.2971	0.633333	-7.98358	1.68248e-13	6.15508e-12	19.9556
IGHV4-28	-659.493	162.444	-7.98297	1.68869e-13	6.17394e-12	19.9519
RP11-963H4.6	-2.14602	0.316667	-7.98052	1.7135e-13	6.26072e-12	19.9376
LRRC31	-1054.7	641.622	-7.97801	1.73944e-13	6.35152e-12	19.9228
PDE1C	-199.596	86.05	-7.96949	1.83011e-13	6.67843e-12	19.8727
ADD1	-7321.22	8925.77	-7.96894	1.83611e-13	6.69612e-12	19.8695
AC053503.12	-74.8158	13.9722	-7.96856	1.84028e-13	6.70713e-12	19.8673
AP000439.3	-370.006	216.178	-7.96804	1.846e-13	6.7238e-12	19.8642
RP11-375H19.2	-11.4708	4.05	-7.96731	1.85405e-13	6.74892e-12	19.8599
MEI1	-260.394	117.489	-7.96597	1.86896e-13	6.79893e-12	19.8521
GNAI1	-1083.48	629.383	-7.96469	1.8833e-13	6.84683e-12	19.8445
CNST	-1242.87	1250.05	-7.9605	1.93092e-13	7.01559e-12	19.8199
FXYD6	-1987.11	673.561	-7.95912	1.94681e-13	7.06892e-12	19.8119
TRIM9	-187.453	62.2389	-7.95807	1.95908e-13	7.10906e-12	19.8057
EHHADH	-1510.8	1057.08	-7.95691	1.97266e-13	7.15388e-12	19.7989
INAFM2	-550.377	314.372	-7.9527	2.0228e-13	7.33118e-12	19.7742
SH3BGRL2	-6476.6	5940.23	-7.95191	2.03229e-13	7.35798e-12	19.7696
CLMP	-1544.64	631.3	-7.95188	2.03272e-13	7.35798e-12	19.7694
EPB41L4A	-293.692	140.211	-7.9502	2.05322e-13	7.42758e-12	19.7595
KCNA1	-62.7531	9.39444	-7.94309	2.14202e-13	7.74403e-12	19.7178
ARHGEF25	-1078.89	388.033	-7.93997	2.18217e-13	7.88432e-12	19.6995
HDAC9	-480.649	248.372	-7.93945	2.18894e-13	7.90386e-12	19.6965
ZFYVE1	-781.826	799.178	-7.93529	2.2438e-13	8.09697e-12	19.6721
HLX-AS1	-3.07462	0.916667	-7.92324	2.41069e-13	8.69382e-12	19.6015
CXCR5	-23.152	6.82778	-7.92004	2.45699e-13	8.85531e-12	19.5827
SERINC1	-6044.6	6724.64	-7.91896	2.47282e-13	8.90688e-12	19.5764
RP11-126O1.6	-3.84293	1.05	-7.91831	2.48246e-13	8.9361e-12	19.5726
CCDC13	-30.0935	18.7722	-7.91741	2.4957e-13	8.97822e-12	19.5673
NIPAL1	-1943.44	1486.3	-7.91448	2.53961e-13	9.13055e-12	19.5502
TMEM120A	-2966.35	2060.43	-7.91413	2.54486e-13	9.14378e-12	19.5481
CKB	-65003.4	24286.4	-7.9128	2.56515e-13	9.21102e-12	19.5403
IGHV6-1	-310.655	61.6278	-7.91167	2.58241e-13	9.26732e-12	19.5337
RP11-148L24.1	-10.1248	1.68333	-7.91093	2.59383e-13	9.30259e-12	19.5294
PARK2	-154.425	94.2667	-7.91068	2.59769e-13	9.31071e-12	19.5279
AGFG2	-2682.51	2210.31	-7.90882	2.62646e-13	9.40806e-12	19.5171
SLC39A5	-8696.09	4506.73	-7.90652	2.66272e-13	9.53209e-12	19.5036
CNTN1	-419.382	91.9833	-7.90275	2.72306e-13	9.7421e-12	19.4815
IGHV1-67	-85.4818	23.4611	-7.90127	2.74704e-13	9.82159e-12	19.4729
KCNG3	-46.8793	13.5833	-7.90117	2.74864e-13	9.82159e-12	19.4723
PRKCD	-3389.39	3513.93	-7.89742	2.81065e-13	1.0037e-11	19.4503
RP11-245G13.2	-40.6269	6.46111	-7.89664	2.82372e-13	1.00775e-11	19.4458
ADAMTS1	-4460.76	1438.79	-7.89498	2.85162e-13	1.01709e-11	19.4361
DAND5	-41.9641	10.0667	-7.89211	2.90069e-13	1.03396e-11	19.4193
AC099539.1	-2.36711	0.65	-7.89193	2.90379e-13	1.03443e-11	19.4182
DDX60	-2961.14	1809.72	-7.89029	2.93219e-13	1.04391e-11	19.4087
ABHD6	-1073.96	770.528	-7.89012	2.93527e-13	1.04437e-11	19.4076
CLCNKB	-31.0041	6.38889	-7.88956	2.94505e-13	1.04721e-11	19.4044
MAGI3	-1473.29	1328.11	-7.88859	2.96194e-13	1.05258e-11	19.3987
SIGLEC17P	-43.07	18.1944	-7.88426	3.0392e-13	1.07938e-11	19.3734
CLU	-9668.56	3984.72	-7.87471	3.21641e-13	1.14162e-11	19.3176
IGKV1D-37	-4.83372	0.9	-7.87371	3.23548e-13	1.14769e-11	19.3118
CLEC4F	-22.1405	8.22778	-7.87258	3.25731e-13	1.15473e-11	19.3052
IGKV1-5	-10780.9	3180.79	-7.87112	3.28551e-13	1.16402e-11	19.2967
SYT9	-12.0608	2.73333	-7.86987	3.30999e-13	1.17199e-11	19.2894
TBC1D10A	-614.266	656.867	-7.86701	3.36659e-13	1.1913e-11	19.2727
WDR7	-767.275	667.139	-7.86496	3.40775e-13	1.20503e-11	19.2607
BTLA	-59.4841	30.8889	-7.86488	3.40952e-13	1.20503e-11	19.2602
POU3F3	-30.8213	7.32778	-7.85993	3.51092e-13	1.24012e-11	19.2314
ADORA3	-269.459	121.694	-7.85747	3.56265e-13	1.25763e-11	19.217
U91328.19	-169.144	127.533	-7.85697	3.57313e-13	1.26057e-11	19.2141
PTPRN	-182.288	73.3389	-7.85476	3.62031e-13	1.27644e-11	19.2012
NFASC	-1156.97	624.978	-7.85218	3.67604e-13	1.29531e-11	19.1861
GIPC1	-8408.3	8795.28	-7.85083	3.70545e-13	1.30489e-11	19.1783
RP11-655M14.4	-0.644404	0.0944444	-7.85064	3.70972e-13	1.3056e-11	19.1771
TMEM255A	-135.962	51.55	-7.84967	3.73117e-13	1.31236e-11	19.1715
MT1P3	-12.3708	2.06111	-7.84716	3.78697e-13	1.33119e-11	19.1569
ANKRD13A	-1903.91	2053.91	-7.84443	3.84867e-13	1.35206e-11	19.141
IKZF1	-782.317	438.722	-7.84087	3.93074e-13	1.38006e-11	19.1202
GPR31	-7.28374	2.55	-7.83878	3.97959e-13	1.39637e-11	19.108
RP11-100L22.1	-2.9217	0.827778	-7.83815	3.99464e-13	1.40081e-11	19.1043
CELF4	-43.1119	12.1556	-7.83778	4.00341e-13	1.40304e-11	19.1022
TRGV4	-12.0921	4.08889	-7.83753	4.00918e-13	1.40422e-11	19.1007
HSD17B1P1	-32.585	25.9222	-7.83627	4.03936e-13	1.41395e-11	19.0934
CTB-133G6.1	-44.0221	20.3111	-7.83454	4.0808e-13	1.42759e-11	19.0833
OLFML2A	-1721.91	845.378	-7.83433	4.08584e-13	1.4285e-11	19.0821
FOXN3	-3222.58	2526.7	-7.8337	4.1012e-13	1.43302e-11	19.0784
CTD-3157E16.2	-144.344	78.3889	-7.83241	4.13267e-13	1.44315e-11	19.0709
RAB9B	-161.727	66.7222	-7.83061	4.17698e-13	1.45775e-11	19.0604
LINC00483	-1209.83	693.778	-7.82776	4.24801e-13	1.48165e-11	19.0438
AP001171.1	-1.36066	0.122222	-7.82142	4.41029e-13	1.53734e-11	19.0069
TMC4	-6529.62	5299.04	-7.81926	4.46684e-13	1.55612e-11	18.9944
SGCA	-297.732	98.1556	-7.81679	4.53258e-13	1.57808e-11	18.98
RP11-209D14.2	-2.42423	0.827778	-7.81601	4.55352e-13	1.58442e-11	18.9754
PGR	-254.982	71.9722	-7.81273	4.64286e-13	1.61455e-11	18.9563
LLNLF-187D8.1	-2.59189	0.672222	-7.81189	4.66592e-13	1.6216e-11	18.9514
SOS2	-1960.87	1892.98	-7.80864	4.75652e-13	1.65211e-11	18.9325
BCL2L15	-3127.33	2161.92	-7.80841	4.76281e-13	1.65331e-11	18.9312
SLC27A4	-3054.51	2932.4	-7.80822	4.76835e-13	1.65425e-11	18.9301
CKMT1B	-1160.33	830.544	-7.80535	4.84975e-13	1.68149e-11	18.9134
XCL2	-22.1156	10.3278	-7.80222	4.94046e-13	1.71192e-11	18.8952
SLC46A3	-2783.32	1539.7	-7.79894	5.03696e-13	1.74433e-11	18.8761
LINC00936	-53.4569	41.25	-7.7958	5.13129e-13	1.77594e-11	18.8579
NEO1	-8150.96	6448.33	-7.79411	5.1828e-13	1.79217e-11	18.8481
RP11-456K23.1	-26.5311	14.5389	-7.79406	5.18434e-13	1.79217e-11	18.8478
IGHV1OR16-4	-3.22524	0.7	-7.79206	5.24601e-13	1.81242e-11	18.8361
FLNB	-26636.7	23085.4	-7.79081	5.28475e-13	1.82472e-11	18.8289
CLDN19	-6.2561	1.81111	-7.78829	5.36392e-13	1.85096e-11	18.8143
DPYD	-1040.77	493.167	-7.78424	5.49383e-13	1.89453e-11	18.7907
EFCAB1	-10.2708	4.85556	-7.78415	5.49665e-13	1.89453e-11	18.7902
TGFB1I1	-2540.49	1377.76	-7.78295	5.53578e-13	1.90689e-11	18.7832
UBE2QL1	-187.008	64.3444	-7.78088	5.60359e-13	1.92911e-11	18.7712
NTN4	-960.655	750.494	-7.77883	5.67207e-13	1.95153e-11	18.7593
PBXIP1	-5285.69	4362.67	-7.77107	5.93743e-13	2.04163e-11	18.7143
C20orf194	-738.191	318.661	-7.76839	6.03226e-13	2.07302e-11	18.6987
IGHJ2P	-3.56103	0.85	-7.76657	6.09725e-13	2.09412e-11	18.6882
TRAF3IP2	-1868.6	1824.89	-7.75858	6.39133e-13	2.19383e-11	18.6418
LOXL4	-206.312	98.5111	-7.75387	6.57114e-13	2.25422e-11	18.6145
RP11-307N16.7	-13.5813	2.86111	-7.75198	6.64474e-13	2.27814e-11	18.6036
ADRA2A	-1954.61	713.867	-7.75141	6.66684e-13	2.28437e-11	18.6003
CCNDBP1	-1696.16	1720.34	-7.74925	6.7522e-13	2.31226e-11	18.5878
CTD-2270F17.1	-5.00783	1.2	-7.74785	6.8081e-13	2.33004e-11	18.5797
SSPN	-1039.93	566.794	-7.74642	6.86575e-13	2.34839e-11	18.5714
DKFZp779M0652	-10.374	3.14444	-7.745	6.92331e-13	2.36669e-11	18.5632
IGHVII-51-2	-2.29802	0.483333	-7.74432	6.95108e-13	2.3748e-11	18.5592
BDH1	-3983.84	3692.96	-7.74311	7.00083e-13	2.39039e-11	18.5522
FAXDC2	-1537.07	767.406	-7.74107	7.08569e-13	2.41796e-11	18.5403
ZNF821	-118.18	120.356	-7.74047	7.11043e-13	2.42484e-11	18.5369
SNCG	-241.731	101.728	-7.74039	7.11416e-13	2.42484e-11	18.5364
RYR3	-205.814	80.05	-7.73784	7.22166e-13	2.46004e-11	18.5216
C1orf21	-3182.84	2539.27	-7.73397	7.38812e-13	2.51528e-11	18.4992
LRRC55	-53.9696	22.4667	-7.72986	7.56875e-13	2.57527e-11	18.4755
SPON1	-5233.1	2234	-7.72532	7.77336e-13	2.64217e-11	18.4492
IGKV2OR22-4	-68.5601	17.6222	-7.7253	7.77441e-13	2.64217e-11	18.4491
AGTR1	-228.603	50.0611	-7.72304	7.87861e-13	2.67602e-11	18.436
TESPA1	-122.166	70.2722	-7.72238	7.90928e-13	2.68488e-11	18.4322
SLIT3	-2841.47	964.361	-7.71638	8.19287e-13	2.77953e-11	18.3975
VWA3B	-72.9645	31.7667	-7.71336	8.33966e-13	2.82769e-11	18.38
SLC25A4	-1651.37	1635.36	-7.71301	8.35712e-13	2.83101e-11	18.378
IGLV2-34	-44.7402	10.1833	-7.71297	8.35917e-13	2.83101e-11	18.3777
C8orf88	-110.216	28.7444	-7.71177	8.4181e-13	2.84932e-11	18.3708
LGI4	-685.641	247.339	-7.70739	8.63761e-13	2.92192e-11	18.3455
TAGLN	-48757.8	14679.3	-7.70421	8.80016e-13	2.97519e-11	18.3272
IGKV1OR9-2	-14.8899	2.87778	-7.70211	8.90958e-13	3.01044e-11	18.315
MT1L	-128.875	53.3556	-7.70163	8.93459e-13	3.01714e-11	18.3122
RP11-554D14.4	-9.41962	2.72222	-7.70037	9.00092e-13	3.03779e-11	18.305
PC	-1339.95	950.133	-7.69783	9.13654e-13	3.08178e-11	18.2903
CPAMD8	-112.352	68.3778	-7.69319	9.38863e-13	3.16498e-11	18.2635
KLRF1	-16.988	7.23889	-7.69179	9.46597e-13	3.18921e-11	18.2554
CYB561D1	-797.031	762.917	-7.68513	9.84347e-13	3.314e-11	18.2169
ADAM33	-530.177	190.344	-7.68505	9.84774e-13	3.314e-11	18.2165
RP11-834C11.7	-11.6757	5.24444	-7.68408	9.90412e-13	3.33106e-11	18.2109
PAQR8	-7673.3	4553.19	-7.68333	9.94813e-13	3.34331e-11	18.2065
RHOC	-10418	9886.77	-7.68326	9.95201e-13	3.34331e-11	18.2062
IGKV2-26	-22.1902	5.02778	-7.67862	1.02268e-12	3.43365e-11	18.1794
SLC7A3	-7.13496	2.61111	-7.67846	1.02363e-12	3.43485e-11	18.1785
RP11-120E11.2	-15.8139	11.8667	-7.67808	1.0259e-12	3.44052e-11	18.1763
CRYAB	-1815.34	644.767	-7.67519	1.04341e-12	3.49723e-11	18.1596
ZNF219	-2138.34	1802.09	-7.66431	1.11212e-12	3.72536e-11	18.0969
CFP	-173.25	88.8778	-7.66337	1.11825e-12	3.74378e-11	18.0915
B3GNT5	-1817.86	1713.81	-7.66183	1.12842e-12	3.77564e-11	18.0826
MIEF2	-438.03	491.067	-7.6612	1.13255e-12	3.78731e-11	18.079
CCR2	-265.701	111.95	-7.65562	1.17024e-12	3.91108e-11	18.0468
RGP1	-2357.06	2462.02	-7.65389	1.18211e-12	3.94727e-11	18.0369
ACSM5	-41.7319	14.6667	-7.65385	1.18242e-12	3.94727e-11	18.0366
RP11-2N1.2	-21.1944	3.10556	-7.65179	1.19675e-12	3.99282e-11	18.0248
IGHV1-2	-3614.45	955.128	-7.64918	1.2152e-12	4.05209e-11	18.0097
PLEKHB2	-6577.71	7808.66	-7.64664	1.23338e-12	4.11034e-11	17.9951
IGLV2-8	-3436.77	792.828	-7.64607	1.2375e-12	4.11983e-11	17.9918
RASGRP4	-112.129	62.2	-7.64605	1.23764e-12	4.11983e-11	17.9917
PCSK6	-1276.25	1074.39	-7.6408	1.27626e-12	4.24598e-11	17.9615
TNIP1	-7078.81	8551.59	-7.63736	1.30222e-12	4.32988e-11	17.9417
VAPA	-4892.82	5083.94	-7.63683	1.30622e-12	4.34071e-11	17.9387
NIT1	-1095.71	1254.89	-7.63576	1.31444e-12	4.36554e-11	17.9325
MT2P1	-15.994	6.16111	-7.63344	1.3324e-12	4.42266e-11	17.9192
IGHVIII-67-2	-4.53017	1.02778	-7.63333	1.33323e-12	4.42291e-11	17.9185
RP11-251M1.1	-7.35191	3.79444	-7.62819	1.37393e-12	4.55536e-11	17.889
IGKV1-9	-2562.56	734.894	-7.62724	1.38158e-12	4.57813e-11	17.8835
GBP3	-4518.7	2882.04	-7.62707	1.38296e-12	4.58008e-11	17.8825
RP11-12M5.3	-7.06955	3.13333	-7.62198	1.42472e-12	4.71572e-11	17.8533
SNRK	-1368.02	1416.17	-7.6176	1.46161e-12	4.83506e-11	17.8281
TMEM155	-15.4141	6.62222	-7.617	1.46677e-12	4.84941e-11	17.8247
CPA3	-1009.68	391.861	-7.6168	1.46853e-12	4.85246e-11	17.8235
NAT2	-629.136	302.917	-7.61335	1.49835e-12	4.94819e-11	17.8037
DENND2A	-723.942	426.65	-7.61236	1.50706e-12	4.97414e-11	17.798
IGHV1OR21-1	-40.5099	10.3389	-7.60565	1.56726e-12	5.16993e-11	17.7595
DIXDC1	-1245.56	779.167	-7.60518	1.57156e-12	5.18118e-11	17.7568
AC114877.3	-1.22386	0.172222	-7.60469	1.57606e-12	5.19308e-11	17.754
RP11-341G23.3	-16.6587	5.54444	-7.60029	1.61713e-12	5.32542e-11	17.7287
IGKV2OR2-2	-2.94334	0.5	-7.59929	1.62657e-12	5.35346e-11	17.723
IGLV8-61	-1761.77	485.239	-7.59806	1.63827e-12	5.38894e-11	17.7159
TRGC2	-100.174	37.5222	-7.5972	1.64656e-12	5.41317e-11	17.711
SKIDA1	-31.6776	13.5333	-7.59569	1.66111e-12	5.45791e-11	17.7023
NLGN4X	-231.103	74.9722	-7.59472	1.67055e-12	5.48585e-11	17.6967
TUB	-242.095	103.928	-7.59379	1.67959e-12	5.51244e-11	17.6914
IGKV2-18	-13.6462	2.87778	-7.59344	1.68299e-12	5.52049e-11	17.6894
PIGS	-2989.88	3103.52	-7.59334	1.684e-12	5.52069e-11	17.6889
IGKV1OR22-5	-31.4146	7.23889	-7.5915	1.7022e-12	5.57722e-11	17.6783
GRAMD4	-3627.32	3237.81	-7.59035	1.71367e-12	5.61165e-11	17.6717
TP53INP1	-1358.63	1158.11	-7.58922	1.72495e-12	5.64545e-11	17.6652
CTC-428G20.1	-8.15246	6.20556	-7.58573	1.76045e-12	5.75839e-11	17.6452
APBB1	-785.965	434.722	-7.57613	1.86175e-12	6.08634e-11	17.5902
ADRB1	-86.4468	41.4889	-7.57442	1.88036e-12	6.14374e-11	17.5804
OTUD7A	-193.522	108.839	-7.5671	1.96227e-12	6.40779e-11	17.5385
IDH3A	-1584.94	1615.38	-7.56673	1.96654e-12	6.41813e-11	17.5363
PP14571	-37.5933	11.5833	-7.56617	1.97296e-12	6.43547e-11	17.5331
IGKV1-37	-4.75587	0.972222	-7.56403	1.99767e-12	6.51246e-11	17.5209
WLS	-3496.1	3467.78	-7.5623	2.01787e-12	6.57462e-11	17.511
SPEG	-1826.82	457.422	-7.56158	2.02641e-12	6.59638e-11	17.5069
RIPK3	-963.104	969.3	-7.56155	2.0268e-12	6.59638e-11	17.5067
GRIN3A	-108.649	52.9667	-7.55911	2.0558e-12	6.68702e-11	17.4927
CTC-296K1.3	-44.246	10.4111	-7.54873	2.18374e-12	7.09921e-11	17.4333
TBC1D9	-1087.67	770.117	-7.54857	2.18581e-12	7.102e-11	17.4324
RP11-25K19.1	-129.922	67.4611	-7.54303	2.25739e-12	7.33049e-11	17.4007
GSTM4	-2139.28	1533.99	-7.54243	2.26528e-12	7.35202e-11	17.3973
NBEA	-577.012	180.122	-7.5412	2.28142e-12	7.4003e-11	17.3903
MAST2	-5451.97	4880.02	-7.53744	2.33188e-12	7.55976e-11	17.3688
GHR	-551.324	195.417	-7.53721	2.335e-12	7.56569e-11	17.3675
IGHV5-51	-7884.11	2284.84	-7.53589	2.35303e-12	7.61988e-11	17.3599
GIMAP8	-560.698	345.489	-7.53557	2.35743e-12	7.6299e-11	17.3581
SLC8A2	-237.766	61.4056	-7.53402	2.37867e-12	7.69436e-11	17.3493
AC012507.3	-4.24781	1.36667	-7.53051	2.42772e-12	7.84868e-11	17.3292
AC090587.4	-7.20175	4.47222	-7.52947	2.44242e-12	7.89186e-11	17.3233
BEX4	-881.884	427.5	-7.52745	2.47124e-12	7.98055e-11	17.3117
OLFM1	-569.37	242.828	-7.52593	2.49315e-12	8.04686e-11	17.3031
RP11-502I4.3	-75.6808	51.9389	-7.52189	2.55232e-12	8.23328e-11	17.28
GRIN2A	-51.8397	14.2889	-7.52148	2.55842e-12	8.24699e-11	17.2777
SHOX	-7.45417	3.16111	-7.52142	2.5594e-12	8.24699e-11	17.2773
PCDH1	-5647.92	5936.37	-7.5188	2.59864e-12	8.36881e-11	17.2623
RP11-579E24.2	-6.94334	0.788889	-7.51745	2.61907e-12	8.42996e-11	17.2546
SMTN	-10690.4	6208.38	-7.51454	2.6637e-12	8.56889e-11	17.238
MUL1	-1343.76	1628.68	-7.51214	2.70091e-12	8.68383e-11	17.2244
ANGPTL5	-14.3915	2.95556	-7.51079	2.72223e-12	8.74754e-11	17.2167
XXyac-YM21GA2.4	-11.2759	3	-7.50963	2.74064e-12	8.80187e-11	17.21
TMEM132D	-25.7752	9.85556	-7.50893	2.75171e-12	8.83255e-11	17.2061
RNF185	-1068.31	1332.69	-7.50806	2.76575e-12	8.87273e-11	17.2011
PDLIM3	-3055.27	1328.62	-7.50447	2.82392e-12	9.05439e-11	17.1806
IGHV3-35	-97.4482	23.6667	-7.50128	2.87667e-12	9.21844e-11	17.1624
MMD2	-3.2082	0.638889	-7.50011	2.89622e-12	9.27602e-11	17.1557
SIPA1L2	-2809.77	1979.54	-7.49768	2.93736e-12	9.40261e-11	17.1419
JAM3	-1227.71	736.728	-7.49497	2.98378e-12	9.54598e-11	17.1265
TTC28	-750.545	476.661	-7.4921	3.03385e-12	9.7004e-11	17.1101
LDHAL6EP	-1.66651	0.3	-7.49201	3.03537e-12	9.7004e-11	17.1096
LINC00996	-68.5334	35.8778	-7.49054	3.06145e-12	9.77837e-11	17.1012
DSEL	-157.732	78.5056	-7.48932	3.08309e-12	9.84212e-11	17.0943
COX5A	-6842	6896.68	-7.4852	3.15761e-12	1.00745e-10	17.0708
ZDHHC22	-22.1838	3.57222	-7.48411	3.17753e-12	1.01325e-10	17.0646
CCDC107	-228.19	239.906	-7.48238	3.20956e-12	1.02291e-10	17.0548
CTSS	-12948.1	12079.1	-7.48121	3.23145e-12	1.02932e-10	17.0481
IGKV1OR1-1	-8.63151	1.76111	-7.4766	3.31884e-12	1.05658e-10	17.0219
ZADH2	-1763.98	1879.49	-7.47609	3.32869e-12	1.05914e-10	17.019
C14orf159	-2011.18	1764.22	-7.4755	3.34002e-12	1.06217e-10	17.0156
LSP1	-2829.73	1688.11	-7.47425	3.3643e-12	1.0693e-10	17.0085
CYP4B1	-68.1211	23.1833	-7.46898	3.46858e-12	1.10185e-10	16.9785
KRTAP13-2	-315.252	25.9778	-7.46826	3.4829e-12	1.1058e-10	16.9744
NIM1K	-20.3584	13.1889	-7.46729	3.50248e-12	1.11141e-10	16.9689
EIF4EBP2	-9217.24	9813.76	-7.46671	3.51441e-12	1.11459e-10	16.9656
FAM63A	-1270.53	1206.08	-7.46642	3.52026e-12	1.11584e-10	16.964
RP11-733O18.1	-15.6241	5.88889	-7.46621	3.5246e-12	1.11661e-10	16.9627
SLC1A1	-3206.45	1095.28	-7.46545	3.54012e-12	1.12092e-10	16.9584
PLEKHA7	-2015.12	2043.65	-7.45979	3.65782e-12	1.15756e-10	16.9263
SH2D1B	-39.4265	17.8056	-7.45732	3.71061e-12	1.17363e-10	16.9122
LINC01352	-7.72778	3.06111	-7.45603	3.73831e-12	1.18175e-10	16.9049
AMHR2	-5.87794	2.23889	-7.45164	3.83442e-12	1.21147e-10	16.8799
RP11-389G6.3	-27.3938	3.2	-7.44392	4.0094e-12	1.26607e-10	16.8361
RPL10L	-49.3238	16.7	-7.44343	4.02067e-12	1.26895e-10	16.8333
RP11-84A14.4	-20.2662	15.9667	-7.44251	4.04219e-12	1.27505e-10	16.8281
TRIM3	-755.565	762.85	-7.44145	4.06698e-12	1.28218e-10	16.8221
PCP4L1	-183.58	37.7556	-7.43826	4.14263e-12	1.30532e-10	16.804
RP11-364B14.3	-2.43298	0.588889	-7.43495	4.22245e-12	1.32975e-10	16.7852
HMGCL	-2428.33	2358.58	-7.43202	4.29453e-12	1.35166e-10	16.7686
LILRP2	-13.0009	4.86111	-7.43193	4.29665e-12	1.35166e-10	16.7681
LTK	-810.103	321.328	-7.4304	4.33477e-12	1.36292e-10	16.7594
ZMIZ1	-4827.78	5090.13	-7.42996	4.34592e-12	1.36569e-10	16.7569
IGHV1-46	-2686.25	814.983	-7.4275	4.40794e-12	1.38444e-10	16.743
WBP1L	-2082.69	2488.81	-7.42727	4.41399e-12	1.38559e-10	16.7416
CGRRF1	-318.891	339.756	-7.42521	4.46673e-12	1.40139e-10	16.7299
AC009014.3	-565.194	202.933	-7.42423	4.49198e-12	1.40856e-10	16.7244
IGKV1-8	-456.943	111.828	-7.41914	4.62591e-12	1.44978e-10	16.6955
DSCR3	-2050.82	2494.76	-7.41706	4.68158e-12	1.46644e-10	16.6838
LINC00163	-4.81115	1.30556	-7.41601	4.71014e-12	1.47446e-10	16.6778
PRR5L	-2689.44	2330.33	-7.41593	4.71225e-12	1.47446e-10	16.6774
MIR1-1HG	-3.95256	0.794444	-7.41492	4.73981e-12	1.48229e-10	16.6716
SHROOM3	-7304.29	6453.55	-7.41371	4.77302e-12	1.49127e-10	16.6648
UAP1	-3151.62	3517.15	-7.41369	4.77362e-12	1.49127e-10	16.6646
RP4-798A17.5	-12.2395	4.64444	-7.41177	4.82652e-12	1.50698e-10	16.6538
LINC00595	-30.5076	4.31111	-7.40709	4.95874e-12	1.54744e-10	16.6273
IGLV1-41	-140.636	32.4444	-7.39426	5.3391e-12	1.66525e-10	16.5546
IGLV2-5	-26.3349	7.10556	-7.39103	5.4393e-12	1.69559e-10	16.5364
FILIP1	-600.578	188.567	-7.38384	5.66912e-12	1.76629e-10	16.4957
ACADM	-2626.63	2013.84	-7.37895	5.83076e-12	1.81568e-10	16.4681
IGLV1-44	-4626.6	1242.16	-7.37766	5.87428e-12	1.82826e-10	16.4608
PRICKLE2	-722.662	337.761	-7.37515	5.95944e-12	1.85378e-10	16.4466
RP11-481J13.1	-9.08936	2.10556	-7.3749	5.96823e-12	1.85552e-10	16.4452
PLEKHG6	-3916.71	3274.78	-7.3726	6.0477e-12	1.87923e-10	16.4322
ITLN1	-12046.4	2970.48	-7.37028	6.12888e-12	1.90344e-10	16.4191
RIPK1	-1564.05	2053.61	-7.36707	6.24299e-12	1.93785e-10	16.401
XXbac-BPG181B23.7	-80.4684	68.7278	-7.36214	6.42227e-12	1.99244e-10	16.3732
MGAT5B	-18.1244	8.8	-7.36009	6.49856e-12	2.01504e-10	16.3616
KLHDC8B	-656.49	427.539	-7.35981	6.50893e-12	2.01718e-10	16.36
WNT2B	-524.841	325.833	-7.35963	6.51545e-12	2.01813e-10	16.359
RP11-396O20.1	-13.9521	2.05556	-7.35922	6.53104e-12	2.02189e-10	16.3567
NRARP	-2720.36	2067.88	-7.3577	6.58811e-12	2.03847e-10	16.3481
KLF3	-5650.54	6458.78	-7.35232	6.79508e-12	2.1014e-10	16.3177
RP11-536C5.2	-4.81161	1.76667	-7.35221	6.79918e-12	2.10156e-10	16.3171
EDNRB	-819.796	488.411	-7.35181	6.8149e-12	2.1053e-10	16.3149
RP13-122B23.8	-70.5371	43.7111	-7.34922	6.91689e-12	2.13568e-10	16.3003
ARMCX1	-438.122	226.828	-7.34766	6.97914e-12	2.15376e-10	16.2915
TRPA1	-739.199	302.033	-7.34645	7.02773e-12	2.16761e-10	16.2846
EXOC6B	-980.376	985.044	-7.34615	7.03974e-12	2.17017e-10	16.283
PCDH11X	-5.75495	1.12222	-7.34575	7.0563e-12	2.17412e-10	16.2807
PALLD	-10769.8	6261.29	-7.34535	7.07233e-12	2.17791e-10	16.2784
IGKV1D-22	-2.70152	0.416667	-7.33361	7.56485e-12	2.32817e-10	16.2123
GRIA1	-26.755	7.63889	-7.33354	7.56825e-12	2.32817e-10	16.2119
D4S234E	-239.185	140.628	-7.33341	7.5737e-12	2.32862e-10	16.2112
LHFPL2	-2094.68	2172.99	-7.33034	7.70824e-12	2.36874e-10	16.1939
GAPDHP74	-2.29019	0.644444	-7.32732	7.84301e-12	2.40889e-10	16.1768
DIRC2	-694.07	661.672	-7.32499	7.94814e-12	2.4399e-10	16.1638
RP11-832A4.7	-43.6988	18.6111	-7.32193	8.08903e-12	2.48184e-10	16.1465
FCGRT	-15385.2	11253.7	-7.32148	8.10988e-12	2.48693e-10	16.144
MMP25	-246.811	143.322	-7.317	8.32069e-12	2.54922e-10	16.1188
CCR9	-31.4431	9.82778	-7.31698	8.32175e-12	2.54922e-10	16.1186
WBSCR17	-213.43	79.6	-7.31288	8.51914e-12	2.60832e-10	16.0956
MAGI2	-221.717	153.911	-7.31121	8.6011e-12	2.63204e-10	16.0862
CDK20	-348.015	301.889	-7.30777	8.77229e-12	2.68302e-10	16.0668
KCNIP4	-311.885	98.7167	-7.30294	9.01817e-12	2.75677e-10	16.0397
SAR1B	-2269.87	2326.07	-7.30279	9.02588e-12	2.75769e-10	16.0389
NAP1L3	-135.039	62.4833	-7.29721	9.31861e-12	2.84564e-10	16.0075
TMEM74	-19.7554	6.59444	-7.29617	9.37422e-12	2.86112e-10	16.0017
PDLIM1	-11086	12227.5	-7.29365	9.51013e-12	2.90109e-10	15.9875
FTH1	-27185.3	22003.5	-7.29286	9.55322e-12	2.91271e-10	15.9831
P2RY10	-110.782	57.45	-7.29242	9.5773e-12	2.91853e-10	15.9806
BTG1	-4842.9	5116.17	-7.28959	9.73361e-12	2.96461e-10	15.9647
AKAP6	-507.399	203.939	-7.28856	9.79115e-12	2.98058e-10	15.9589
RPS6KA1	-6672.05	6246.97	-7.28466	1.00115e-11	3.04608e-10	15.9371
MYO15B	-11204.9	8393.03	-7.28433	1.00306e-11	3.0503e-10	15.9352
RP11-384P7.7	-51.1925	11.4278	-7.2842	1.00381e-11	3.05098e-10	15.9345
CASZ1	-1305.38	1278.52	-7.28368	1.0068e-11	3.05848e-10	15.9315
PRRT1	-133.553	101.4	-7.28229	1.01482e-11	3.08125e-10	15.9237
BAD	-1124.37	1300.68	-7.27743	1.0434e-11	3.16636e-10	15.8965
ZNF582-AS1	-29.9152	17.3222	-7.2768	1.04717e-11	3.17615e-10	15.8929
RALYL	-13.2893	2.51667	-7.27552	1.05485e-11	3.19778e-10	15.8858
CCL21	-2141.1	872.078	-7.27337	1.06787e-11	3.23559e-10	15.8737
LMBRD1	-2255.6	2491.38	-7.27246	1.07344e-11	3.25076e-10	15.8686
CTD-2306A12.1	-13.4827	6.18333	-7.26711	1.10675e-11	3.34992e-10	15.8386
IGHV1-17	-18.7563	4.44444	-7.26417	1.12545e-11	3.40474e-10	15.8221
OGDH	-7621.84	8978.01	-7.26381	1.12777e-11	3.41e-10	15.8201
RP11-266I3.9	-3.67711	1.05	-7.2607	1.14796e-11	3.46924e-10	15.8027
CAMK2D	-2688.67	2720.98	-7.25742	1.16962e-11	3.53287e-10	15.7843
FAIM3	-403.751	223.717	-7.25475	1.18762e-11	3.58541e-10	15.7693
DOLPP1	-1384.85	1334.4	-7.25312	1.19868e-11	3.61693e-10	15.7602
PTTG1IP	-11272.8	13603.2	-7.25143	1.21027e-11	3.65001e-10	15.7508
FBLN1	-10929.9	5112.81	-7.25049	1.21677e-11	3.66772e-10	15.7455
IGKV3OR2-5	-11.5205	1.85	-7.24994	1.22064e-11	3.67749e-10	15.7424
DUSP5	-2026.29	1171.13	-7.24908	1.22663e-11	3.69361e-10	15.7376
COL19A1	-29.9627	6.81667	-7.24862	1.22981e-11	3.70129e-10	15.735
GNAQ	-3140.22	3510.8	-7.23648	1.31795e-11	3.96451e-10	15.6671
MIR770	-1.75956	0.444444	-7.23475	1.33099e-11	4.00166e-10	15.6574
RP11-867O8.5	-14.7388	2.63333	-7.23133	1.35714e-11	4.0782e-10	15.6383
AP000892.6	-1000.5	286.839	-7.22916	1.37406e-11	4.1269e-10	15.6262
PENK	-198.945	42.5	-7.22718	1.38963e-11	4.17153e-10	15.6151
AUH	-648.194	772.389	-7.22601	1.39892e-11	4.19726e-10	15.6085
PHYKPL	-1699.1	1786.77	-7.22541	1.40363e-11	4.20924e-10	15.6052
AXL	-1995.42	1284.31	-7.22465	1.40977e-11	4.22549e-10	15.601
HSPB7	-1282.23	395.294	-7.22394	1.41543e-11	4.24026e-10	15.597
IGHV3-6	-18.4763	4.08889	-7.22305	1.42262e-11	4.25962e-10	15.592
IGHM	-36190.5	10774.9	-7.22097	1.43954e-11	4.30807e-10	15.5804
MEP1AP4	-31.2404	10.9389	-7.21928	1.45348e-11	4.34755e-10	15.571
IGHV5-78	-45.3874	18.0444	-7.21769	1.46667e-11	4.38477e-10	15.5621
NDRG1	-33271.5	19595.6	-7.21564	1.48385e-11	4.43386e-10	15.5507
CALCOCO2	-4520.65	5234.84	-7.20493	1.57709e-11	4.71007e-10	15.4908
TAGAP	-400.03	258.861	-7.20338	1.59099e-11	4.74913e-10	15.4822
FAM134B	-2316.94	1642.32	-7.19922	1.62905e-11	4.86026e-10	15.459
RP11-774O3.3	-122.9	74.3611	-7.19719	1.64798e-11	4.91424e-10	15.4477
PDCD6IP	-7832.26	9739.25	-7.19634	1.65593e-11	4.93541e-10	15.443
RP11-249C24.11	-3.19392	0.344444	-7.19554	1.66349e-11	4.95543e-10	15.4385
SLMAP	-3715.32	3461.71	-7.19534	1.66533e-11	4.95837e-10	15.4374
GBA	-1871.38	1974.16	-7.19426	1.67559e-11	4.98637e-10	15.4314
IGKV7-3	-23.0903	6.03889	-7.1879	1.73721e-11	5.16712e-10	15.3959
CTC-378H22.2	-11.433	6.23889	-7.1856	1.76003e-11	5.23233e-10	15.3831
RP11-314C9.2	-1.26992	0.283333	-7.18387	1.77745e-11	5.28142e-10	15.3734
DMPK	-1937.88	1430.54	-7.18354	1.78075e-11	5.28855e-10	15.3716
ARPIN	-2200.63	2290.99	-7.18311	1.78507e-11	5.29868e-10	15.3692
JAZF1	-556.221	328.028	-7.1809	1.8076e-11	5.36283e-10	15.3569
FEZ1	-373.214	220.894	-7.18032	1.81361e-11	5.37791e-10	15.3537
KCNA5	-70.6108	23.4889	-7.17727	1.84523e-11	5.46889e-10	15.3367
MYH15	-156.577	87.0389	-7.17596	1.85902e-11	5.50698e-10	15.3294
CLECL1	-26.8936	13.4333	-7.17247	1.89615e-11	5.61411e-10	15.31
GABRG2	-34.8798	6.17778	-7.17141	1.90753e-11	5.64496e-10	15.3041
MFN2	-5037.44	5869.68	-7.17124	1.90945e-11	5.64776e-10	15.3031
RP5-887A10.1	-11.6688	4.32778	-7.16648	1.96159e-11	5.79905e-10	15.2767
CEACAM3	-65.1796	33.5278	-7.16416	1.98754e-11	5.8728e-10	15.2638
FEZ2	-1263.58	1615.37	-7.16377	1.99197e-11	5.8829e-10	15.2616
AC007386.2	-4.47766	1.46111	-7.16018	2.0329e-11	6.00075e-10	15.2416
IL5RA	-27.4463	10.7667	-7.15996	2.03545e-11	6.00525e-10	15.2404
SLAMF7	-1675.48	747.683	-7.15985	2.03674e-11	6.00601e-10	15.2398
SOWAHA	-2037.94	880.856	-7.15904	2.04606e-11	6.03046e-10	15.2353
HIST1H3E	-62.6711	41.3167	-7.15716	2.06802e-11	6.09212e-10	15.2248
TLR7	-205.416	112.189	-7.15503	2.09303e-11	6.16268e-10	15.213
MEIS1	-988.921	438.117	-7.15367	2.10919e-11	6.20711e-10	15.2055
NCF1B	-58.0129	31.1	-7.15359	2.11025e-11	6.20713e-10	15.205
AKAP5	-428.232	265.85	-7.15301	2.11709e-11	6.22409e-10	15.2018
MIR4537	-5.10917	1.64444	-7.14862	2.17042e-11	6.37768e-10	15.1774
FRAT1	-244.988	271.706	-7.14586	2.20463e-11	6.47492e-10	15.162
PLD4	-139.705	73	-7.14453	2.22117e-11	6.52025e-10	15.1547
SEC1P	-20.9231	10.5111	-7.14198	2.25348e-11	6.61176e-10	15.1405
RP11-798K23.5	-21.8042	12.6167	-7.1416	2.25833e-11	6.62197e-10	15.1384
TEPP	-3.50069	1.44444	-7.14153	2.25923e-11	6.62197e-10	15.138
KRT8P24	-49.2764	17.2056	-7.13782	2.30723e-11	6.75926e-10	15.1174
MEF2C	-986.484	633.378	-7.13764	2.30956e-11	6.7627e-10	15.1164
SH3BP1	-2716.49	2485.47	-7.13364	2.36239e-11	6.91392e-10	15.0942
ANPEP	-157515	15517.5	-7.13089	2.39932e-11	7.01849e-10	15.079
ITPKB	-1807.85	1406.95	-7.12706	2.4519e-11	7.16871e-10	15.0577
CAMK2G	-2194.13	2579.72	-7.12496	2.48118e-11	7.25069e-10	15.046
IGLV1-62	-7.6725	1.72778	-7.12213	2.52118e-11	7.36389e-10	15.0303
[truncated: 6,659 more rows]
